# Supplementary material for: The features of polyglutamine regions depend on their evolutionary stability
Source: BMC Evol Biol. 2020 May 24;20:59. doi: 10.1186/s12862-020-01626-3 (PMC7247214; doi:10.1186/s12862-020-01626-3)
Supplement: Supplementary file 1 — Additional file 1 : Supplementary File 1. GO enrichment analysis. Results of the GO enrichment analyses per category and taxa. [file 12862_2020_1626_MOESM1_ESM.xls]

## Sheet: Hsa-Cat1
Category	Term	Count	%	PValue	Genes	List Total	Pop Hits	Pop Total	Fold Enrichment	Bonferroni	Benjamini	FDR
UP_KEYWORDS	Coiled coil	533	38.9335	1.37703e-115	Q765P7, Q8N1W1, P46940, Q8N283, Q9ULG6, Q8IUG5, B2RTY4, O75962, O15212, Q8TC71, P55196, Q6ZVL6, P55197, O75691, Q9P2D6, Q9P2D7, Q08830, P13646, O75694, Q92922, Q96Q15, P17661, Q9P2D1, Q5T0U0, Q99569, P46937, P46939, P55198, W0Z7M9, Q68DE3, Q96L93, Q9P2E9, Q9BV73, P98082, Q96L91, Q9Y4B5, Q8WXI9, Q8IWJ2, G3V140, O75376, Q6P5Q4, Q92805, F6M2K4, Q2M2I5, Q9BUW7, Q8TC92, Q9NWA0, Q8IVE3, O75570, P01106,…	1369	3036	20581	2.6393	6.00383e-113	6.00383e-113	1.94476e-112
UP_KEYWORDS	Phosphoprotein	940	68.6633	1.94287e-108	P46940, Q8N1W1, Q3ZCQ8, Q7L0Q8, Q9UGL1, O75691, P13646, O75694, Q96Q15, Q9NUY8, P46937, Q99424, P46939, P22413, Q96L93, Q5T011, Q9Y6J0, Q96L91, P98082, Q9Y4B5, Q8WXI9, Q04609, Q9NXF1, G3V140, P52569, Q92805, Q6P5Q4, Q92804, Q13315, Q96PN7, O75886, P01106, Q8NE71, Q8NDV7, Q5BKZ1, Q8NI77, P35590, Q92817, Q8WVK7, Q86XD5, P52756, O75683, E9PKC0, P07814, Q9H6L4, P51587, O15350, A0A0C4DG53, E9PGC8, Q8I…	1369	8246	20581	1.71375	8.47092e-106	4.23546e-106	2.7439e-105
UP_KEYWORDS	Alternative splicing	972	71.0007	1.39405e-52	Q8TBR7, Q8N1W1, Q8N283, Q3ZCQ8, Q13472, Q7L0Q8, Q6ZVL6, Q9UGL1, P13646, O75694, Q9UKG9, Q96Q15, Q969V3, Q9NUY8, P46937, Q9UBZ9, Q96L93, Q5T011, A0AV02, Q9Y6J0, Q96L91, P98082, Q49A92, Q9Y4B5, Q04609, Q9NXF1, G3V140, Q969W9, P52569, Q6P5Q4, Q92804, Q96H72, Q96PN7, O75886, Q8IVE3, P01106, Q8NDV3, Q8NE71, Q8NDV7, Q9Y6H5, Q5BKZ1, P35590, Q8WVK7, Q86XD5, Q8NFW5, P52756, E9PKC0, Q9H6L4, O15350, A0A0C4D…	1369	10587	20581	1.38025	6.07805e-50	2.02602e-50	1.9688e-49
GOTERM_MF_DIRECT	GO:0005515~protein binding	861	62.8926	1.71591e-39	P46940, Q3ZCQ8, Q13472, Q7L0Q8, Q9UGL1, O75691, O75694, Q96Q15, Q969V3, Q969V5, Q9NUY8, P46937, Q9UBZ9, P46939, P22413, P98082, Q96L91, Q8WXI9, Q9NXF1, G3V140, Q969W9, Q92805, Q92804, Q96H72, Q13315, Q6J9G0, O75886, Q8IVE3, P01106, Q8NE71, Q8NDV7, Q9Y6H5, Q5BKZ1, Q8NI77, P35590, Q8WVK7, Q86XD5, P52756, O75683, Q13326, P07814, Q9H6L4, P51587, O15350, E9PGC8, A0A0C4DG53, Q8IVL1, O75052, Q5VVH5, Q96…	1235	8785	16881	1.33965	1.66958e-36	1.66958e-36	2.70163e-36
UP_KEYWORDS	Nucleus	551	40.2484	1.54112e-35	P27540, Q8IUG5, Q3ZCQ8, Q9BUT9, P55197, Q9UGL1, O75691, Q02086, O75694, Q92922, Q7Z3B4, Q8IUH3, Q96Q15, Q9P2D1, Q9UBZ9, P46937, P55198, W0Z7M9, Q68DE3, Q9Y6J0, Q96L91, Q8WXI9, Q9NXF1, O75376, F6M2K4, Q92804, Q13315, Q96PN7, Q9NWA0, P01106, Q6P2Q9, A6ND36, Q8NDV3, Q9ULH7, Q8NE71, Q5BKZ1, Q9BXA9, K7EKI8, Q8NI77, Q6GQQ9, Q9BQ70, O95639, Q8NFW5, P52756, O75683, H7BYN4, Q9NY93, O95630, P51587, O15350,…	1369	5244	20581	1.57962	6.71929e-33	1.67982e-33	2.17651e-32
UP_KEYWORDS	Cytoplasm	514	37.5457	2.94172e-34	Q765P7, Q8N1W1, Q8IUG5, O75962, A8MVW5, Q9BUT9, Q8TC71, Q9P2D7, Q8IUH3, P17661, Q96Q15, Q8WUH2, Q99569, P46937, P46939, W0Z7M9, Q96L93, Q9BV73, P98082, Q9Y4B5, Q04609, Q8IWJ2, G3V140, Q9NXF1, Q8TAP6, Q6P5Q4, Q92804, O75886, Q8IVE3, A6ND36, Q8NE71, O75385, Q8NDV7, Q9UFH2, Q9Y6H5, K7EKI8, Q8NI77, Q92817, Q6GQQ9, Q8WVK7, Q9NP74, E9PKC0, Q13326, H7BYN4, P07814, O95630, Q96K76, P51587, O15350, Q96AQ6,…	1369	4816	20581	1.6045	1.28259e-31	2.56518e-32	4.15456e-31
GOTERM_CC_DIRECT	GO:0005654~nucleoplasm	356	26.0044	5.45754e-33	Q96BD5, P27540, Q7Z589, Q9H0A0, Q8IUG5, Q9C0E2, Q3ZCQ8, Q13472, P55196, P55197, O75691, Q9UGL1, O43290, Q86XR8, O43390, Q96T37, Q92922, Q8TEQ6, Q969V5, Q5T4S7, Q9NWT6, Q9UBZ9, P39880, P46937, Q9Y692, Q96JB2, P46939, Q13952, W0Z7M9, O43474, O60216, Q9UQL6, Q9UKV0, Q9Y6J0, Q96L91, Q8WXI9, Q15459, P41229, Q9NXF1, O75376, Q969W9, Q15596, O60934, Q92793, Q9UDY2, F6M2K4, F8VXC8, Q92804, Q13315, P46531,…	1280	2784	18224	1.8206	3.67293e-30	3.67293e-30	8.18697e-30
UP_KEYWORDS	Cytoskeleton	173	12.637	2.29765e-25	Q9UPN4, Q5SZL2, Q9UPN3, Q01082, Q9NR09, Q08AD1, Q8N3V7, Q9Y3P9, Q8NDL9, Q9Y2D8, A8MVW5, P0CAP2, F8W9J4, Q6UVJ0, Q96PY6, Q9P2D7, O43294, Q86XR8, Q13137, Q96LK0, O00401, O43379, Q8IYY4, Q9Y490, Q99569, Q9C0D2, Q5T4S7, H3BRF9, Q96JB5, Q15154, O15020, Q7Z7A1, P46939, P11277, Q14679, Q502W7, Q15149, Q96L93, Q9BV73, P0CAP1, A8K8P3, P67936, Q9Y4B5, Q9H6D7, P02549, C9J066, J3KQA9, Q92608, Q2M329, E7ERF0,…	1369	1138	20581	2.28542	1.00178e-22	1.66963e-23	3.24495e-22
UP_KEYWORDS	Activator	120	8.76552	4.50823e-24	P51531, P27540, Q9ULV5, Q8TEY5, P51449, F5H0I3, Q8IZQ8, A0A1W2PQJ7, Q9UHV7, Q02086, O43294, Q15532, B0QYS6, Q13772, Q00577, P15822, P46937, P35680, Q13952, Q9H4Z2, O15516, O43524, O43474, Q15911, Q92879, J3KQC0, Q8IX12, Q02446, A0A140T9R5, O15405, Q15596, Q9UPP1, P49336, Q92793, F6M2K4, P46531, Q96PN7, Q9NWA0, Q8NEZ4, Q9BQG0, P01106, Q03060, Q92585, P43699, Q9ULH7, Q8NE71, P10071, P10070, Q5BKZ1,…	1369	661	20581	2.72925	1.96559e-21	2.80798e-22	6.36692e-21
UP_KEYWORDS	Ubl conjugation	217	15.851	1.28351e-21	Q96BD5, O15212, P78318, Q6UVJ0, P55197, Q9UGL1, O43290, O43390, Q92922, Q12981, P26196, Q969V5, Q96JB5, P46937, P39880, O43474, Q03252, Q9P2E9, Q9UQL6, Q9UKV0, Q9Y6J0, J3KQC0, Q9NYJ8, Q8WXI9, Q15459, O75376, Q15596, Q92793, F8VXC8, Q86UP3, P46531, P01106, Q969H0, Q03060, Q9ULH7, P26367, Q92786, P10071, Q9ULJ6, Q9Y6H5, Q8NI77, Q9NP74, P35712, Q9NY74, H7BYN4, O95630, P51587, O15350, A0A0C4DG53, P38…	1369	1705	20581	1.91337	5.5961e-19	6.99512e-20	1.81268e-18
UP_KEYWORDS	Transcription regulation	267	19.5033	3.93967e-20	Q96BD5, P27540, Q7Z589, P29692, F5H0I3, P55197, Q9UBG7, Q9UGL1, Q02086, Q92922, Q15714, Q9P2D1, Q13772, O00401, Q9C0D4, Q00577, Q9NWT6, P39880, P46937, Q9Y692, Q13952, Q9H4Z2, O43474, W0Z7M9, J9JID5, Q9UQL6, Q9UKV0, Q8WXI9, J3KQC0, P41229, O75376, Q15596, Q92793, F8VXC8, F6M2K4, Q86UP3, P46531, Q96PN7, Q9NWA0, Q5SZG2, Q9BQG0, P01106, Q03060, P43699, Q9ULH7, Q92786, P10071, P26367, P10070, Q9ULJ6,…	1369	2332	20581	1.72126	1.7177e-17	1.90855e-18	5.56396e-17
UP_KEYWORDS	Transcription	272	19.8685	5.80106e-20	Q96BD5, P27540, Q7Z589, P29692, F5H0I3, P55197, Q9UBG7, Q9UGL1, Q02086, Q92922, Q15714, Q9P2D1, Q13772, O00401, Q9C0D4, Q00577, Q9NWT6, P39880, P46937, Q9Y692, Q13952, Q9H4Z2, O43474, W0Z7M9, J9JID5, Q9UQL6, Q9UKV0, Q8WXI9, J3KQC0, P41229, O75376, Q15596, Q92793, F8VXC8, F6M2K4, Q86UP3, P46531, Q96PN7, Q9NWA0, Q5SZG2, Q9BQG0, P01106, Q03060, P43699, Q9ULH7, Q92786, P10071, P26367, P10070, Q9ULJ6,…	1369	2398	20581	1.70523	2.52926e-17	2.52926e-18	8.19278e-17
UP_KEYWORDS	Isopeptide bond	158	11.5413	1.90016e-19	Q12906, Q96BD5, Q9UPN6, Q9HAU4, Q9ULV5, Q9C0J8, Q9UPN9, Q3T8J9, O15212, Q12830, F8W9J4, A0A1W2PQJ7, Q96PK6, D6REX3, P55197, O43318, Q9UGL1, O43290, O43390, Q92922, Q1ED39, A6NEM2, P15056, B7ZBM3, Q5VZL5, Q99569, P05556, Q969V5, P25963, H3BRF9, Q9P2N5, Q96JB5, P39880, P17844, O15516, Q03252, O43474, Q15911, O14503, Q9P2E9, Q96L93, Q9P0W2, Q96ME7, Q8WXI9, Q8IX12, Q15459, K4DI93, Q9NWH9, O75376, O14…	1369	1132	20581	2.09833	8.28468e-17	7.53153e-18	2.68357e-16
UP_KEYWORDS	Acetylation	353	25.7852	2.78111e-19	P46940, P27540, Q9UK59, Q9H0A0, P29692, O14787, P78318, O15212, Q9BUT9, P55196, Q9UGL1, Q9UKG9, O43294, O43390, Q96T37, Q92922, Q96Q15, O00401, Q9C0D5, O43379, D6RJ07, P20936, Q00577, Q5T447, Q5T4S7, Q9NWT6, E9PMT2, Q96JB2, Q9Y692, Q8IWX8, Q03252, Q9P2E9, Q9UQL6, P98082, Q96L91, Q15459, Q96G75, Q9NS69, Q8IWJ2, Q14444, O75376, Q15596, Q92793, Q9BQ61, F8VXC8, Q92804, F6M2K4, O95149, Q86UP3, P10644,…	1369	3424	20581	1.5499	1.21256e-16	1.01047e-17	3.92773e-16
GOTERM_CC_DIRECT	GO:0005737~cytoplasm	508	37.1074	5.45085e-19	P46940, P27540, O15212, Q9BUT9, Q8TC71, P55196, P55197, Q9UGL1, O75691, Q9P2D7, Q8IUH3, Q96Q15, Q99569, Q969V5, P46937, P46939, W0Z7M9, Q9Y6J0, Q9Y4B5, Q04609, Q96G75, Q92902, G3V140, Q9NXF1, Q92804, Q2M2I5, Q13315, O75886, Q8IVE3, O75570, Q8NDV3, Q8NE71, O75385, Q13233, Q9UFH2, Q9Y6H5, Q8NI77, Q92817, Q6GQQ9, Q9NP74, Q86XD5, E9PKC0, Q13326, P07814, O95630, Q9H6L4, Q96K76, P51587, O15350, E9PGC8,…	1280	5222	18224	1.38503	3.66843e-16	1.83421e-16	8.17694e-16
GOTERM_CC_DIRECT	GO:0005634~nucleus	517	37.7648	1.08948e-17	P46940, P27540, Q8IUG5, Q13472, Q9BUT9, P55197, Q9UGL1, Q02086, P13646, Q8IUH3, Q96Q15, Q9P2D1, Q13772, Q9UBZ9, P46937, P55198, W0Z7M9, Q68DE3, Q9Y6J0, Q96G75, O75376, F6M2K4, Q92804, Q13315, Q96PN7, P01106, Q6P2Q9, O75381, A6ND36, Q9ULH7, O75976, Q5BKZ1, Q9BXA9, K7EKI8, Q8NI77, Q6GQQ9, Q9BQ70, Q8NFW5, P52756, E9PKC0, H7BYN4, O95630, Q9H6L4, Q96K76, P51587, O15350, Q96AQ6, A0A0C4DG53, Q6UB99, Q9Y…	1280	5415	18224	1.35933	7.33222e-15	2.44407e-15	1.63436e-14
GOTERM_BP_DIRECT	GO:0045893~positive regulation of transcription, DNA-templated	93	6.79328	2.41753e-16	Q12906, P27540, P51531, Q13145, P51449, Q12830, Q8IZQ8, A0A1W2PQJ7, O00287, Q9UHV7, Q9UBG7, O43294, Q92922, P52952, B0QYS6, Q13772, P06400, P35680, Q99729, O43524, O15516, O43474, Q15911, P98082, A0A140T9R5, O15405, O14920, Q9NQ66, Q9UPP1, Q92793, F6M2K4, Q92804, F8VXC8, P46531, Q96PN7, O00268, P56524, P01106, P43699, Q92786, P10071, P26367, P10070, Q6PL18, P20226, Q15788, P19532, P51587, O15350,…	1207	515	16792	2.5123	8.23119e-13	8.23119e-13	4.10783e-13
UP_KEYWORDS	Methylation	138	10.0804	2.45797e-16	Q12906, Q9UPN6, Q96J94, Q86WJ1, Q9C0J8, Q9Y3Y2, Q9UPN9, Q12830, Q9BUT9, Q96AE4, Q14671, P13646, Q92922, P17661, Q1ED39, A6NEM2, O00401, Q9P2D1, P15056, P06400, Q99569, A0A0C4DFM2, Q9P2N5, Q70EL1, Q70EL4, Q99729, O43524, Q92734, Q03252, Q15149, Q96EV2, O94842, Q07890, O00159, Q9NYJ8, P34932, Q5TAX3, Q9NWH9, Q14444, H0Y493, Q15596, Q92793, Q92804, F6M2K4, A0A0C4DFN6, Q96JM2, O00268, Q8NEZ4, Q5VT52,…	1369	1001	20581	2.07256	9.68114e-14	7.43849e-15	3.10862e-13
UP_KEYWORDS	Polymorphism	940	68.6633	8.99081e-16	P46940, Q8N1W1, Q8N283, C9JXX5, Q13472, Q7L0Q8, O75691, Q08830, P13646, Q9UKG9, Q96Q15, Q07075, Q969V3, P46937, Q9UBZ9, P46939, P22413, Q8IVH4, Q96L93, A0AV02, Q9Y6J0, Q96L91, P98082, Q49A92, Q9Y4B5, Q8WXI9, Q04609, G3V140, Q969W9, P52569, Q92805, Q96H72, Q13315, Q6J9G0, Q96PN7, Q8IVE3, P01106, Q8NDV3, Q8NE71, Q8NDV7, Q9Y6H5, Q8NI77, P35590, Q92817, Q86XD5, Q8NFW5, P52756, O75683, E9PKC0, Q13326,…	1369	12043	20581	1.17343	3.87246e-13	2.76446e-14	1.25455e-12
GOTERM_CC_DIRECT	GO:0005813~centrosome	76	5.5515	9.54817e-14	Q9UPN4, Q5SZL2, Q08AD1, Q13042, Q9Y3P9, Q8IUG5, Q8IWC1, A8MVW5, Q9C099, Q6UVJ0, Q96PY6, Q9NS87, Q96SN8, Q9P209, Q8TCU4, Q86XR8, Q8N960, Q8N137, Q5TB80, Q96LK0, O43379, Q5SW79, Q96DN5, Q96CW5, Q8N4C6, Q9Y5B0, Q9C0D2, Q6EMB2, Q5T4S7, H3BRF9, Q96JB5, A0A087WX34, Q15154, Q7Z7A1, E9PKB1, Q2KHM9, O94986, Q2NKX8, Q502W7, Q9BV73, A8K8P3, Q5EBL4, Q8TD19, Q9H6D7, Q8NHQ1, C9J066, J3KQA9, E7ERF0, G3V140, Q8I…	1280	426	18224	2.54002	6.42575e-11	1.60644e-11	1.4323e-10
GOTERM_MF_DIRECT	GO:0003713~transcription coactivator activity	55	4.01753	2.39004e-13	P51531, P27540, Q8IZQ8, Q9BQA5, Q8IY57, O00287, Q9UHV7, Q03933, O43294, Q92922, Q9Y5T5, A6NEM2, Q13772, P06400, Q9UBK2, Q92830, P46937, P17844, Q9Y692, Q13952, O60244, W0Z7M9, P35637, O15164, Q99967, O14497, Q02446, Q8IX12, O75925, Q99583, Q9UGU0, Q15596, Q9GZV5, Q92793, F6M2K4, F8VXC8, Q92841, Q93074, O00268, Q14686, Q96RI1, Q9H7E2, Q92585, Q14872, Q9ULH7, Q09472, O94864, P15336, Q8IX03, Q6P1K2,…	1235	248	16881	3.03139	2.32577e-10	1.16289e-10	3.76343e-10
GOTERM_MF_DIRECT	GO:0044822~poly(A) RNA binding	148	10.8108	1.83661e-12	Q12906, Q9UPN3, Q96CM3, Q9UK59, Q01082, Q9H0A0, Q5TC82, Q9C0J8, Q9BYJ9, Q9Y3Y2, O60293, Q96PK6, Q96AE4, A5YKK6, O75691, O43290, Q9NRA8, Q14671, O43390, Q96T37, Q1ED39, Q96Q15, Q8IUH3, Q96EU6, Q8TEQ6, D6RJ07, P26196, Q00577, O60287, Q8TDD1, Q9P2N5, Q8WUQ7, P17844, Q8IWX8, Q9BSC4, Q99729, Q15149, Q96EV2, Q9P2E9, E9PAU2, A0A087WY31, A0A087WYN9, Q14789, Q92879, Q9Y4B5, O15116, Q8IX12, Q15459, Q5TAX3,…	1235	1129	16881	1.79184	1.78705e-09	5.95684e-10	2.89172e-09
GOTERM_BP_DIRECT	GO:0045944~positive regulation of transcription from RNA polymerase II promoter	131	9.56903	3.43901e-12	P51531, P27540, Q9ULG6, Q9ULV5, Q8TEY5, P78318, Q8IZQ8, A0A1W2PQJ7, Q9UHV7, Q96PK6, P55197, Q92922, P52952, Q15532, A6NEM2, B0QYS6, Q9P2D1, P06400, Q9H1B7, P25963, Q96JB5, P17844, P46937, P35680, Q9Y692, O60902, O60281, Q13952, O15516, O43524, W0Z7M9, O43474, O60216, Q9UQL6, J3KQC0, O60583, O14920, Q6NUN9, Q15596, O00468, P49336, Q92793, F6M2K4, P46531, Q96JM2, O00268, P56524, Q5SZG2, P01106, Q03…	1207	981	16792	1.85779	1.27485e-08	6.37424e-09	6.33846e-09
UP_KEYWORDS	Repressor	87	6.355	4.93713e-12	Q96BD5, Q7Z589, Q9HCK8, Q76L83, Q86YW9, Q9ULV5, Q9BW11, Q9UPN9, Q9C0A1, Q08117, Q3T8J9, O95935, Q9BQA5, Q4VX54, Q15233, Q9UHV7, Q96PK6, Q9UGL1, A5YKK6, Q7RTS1, Q04726, Q04727, Q04724, Q8N9N5, Q9Y2X9, Q9UGP4, P49750, Q15714, P06400, Q9HCS4, B7ZBM3, O75461, Q96ST3, P46937, P39880, A0A1B0GUN8, Q2M1P5, Q15911, O14503, Q9UQL6, Q9UKV0, O15164, Q99967, J3KQC0, Q8WXI9, Q8IX12, Q9P2R6, P41229, Q99583, Q8N…	1369	592	20581	2.20933	2.1526e-09	1.43507e-10	6.9727e-09
UP_KEYWORDS	DNA-binding	215	15.7049	6.23777e-12	Q96BD5, P27540, P29692, Q13472, F5H0I3, P55197, Q9UBG7, Q02086, P52952, Q9P2D1, Q9C0D4, Q00577, Q9UBZ9, P39880, Q9Y692, O60902, Q13952, Q9H4Z2, O43474, Q68DE3, J9JID5, Q9H2Z4, Q96L91, J3KQC0, Q02818, O75376, Q92804, Q86UP3, Q13315, Q96PN7, P01106, Q03060, P43699, P26367, Q92786, P10071, P10070, Q9BXA9, O95239, Q5BKZ1, P35711, Q9NQV6, Q9BWH6, Q9UMN6, P35712, Q9BQ70, Q8NFW5, O75683, P51587, O15350,…	1369	2050	20581	1.57669	2.71968e-09	1.6998e-10	8.80956e-09
UP_KEYWORDS	Chromosomal rearrangement	58	4.23667	4.28792e-11	Q5SZL2, X6RLX0, Q8IVL0, Q8NF50, Q76L83, Q8IZU9, Q9UPN9, D6REX3, P55196, Q15233, P55197, A0A087WW39, Q96T37, Q9Y5T5, Q15532, Q5M775, P42566, Q13772, P15056, P26196, H3BRF9, Q15154, Q7Z7A1, P55198, O43524, Q92734, W0Z7M9, P06753, P20700, P35637, Q9UKV0, Q8NHQ8, P55291, O15164, Q9NYJ8, Q9P2R6, Q0VF96, Q8NG31, Q9NVA2, O15409, Q92793, Q92804, Q86UP3, P04629, P01106, P35749, Q8TCJ0, Q9ULH7, A0A075B749,…	1369	334	20581	2.61063	1.86953e-08	1.09972e-09	6.05578e-08
UP_KEYWORDS	Cell cycle	90	6.57414	5.3967e-11	Q9UPN4, Q9NR09, Q13042, Q9ULG6, Q9Y3P9, Q96EA4, A8MVW5, P49916, Q9C099, Q96R06, Q6UVJ0, Q96PY6, Q8N9N5, Q9Y5T5, Q8N137, A6NEM2, Q86T82, O00401, P06400, H3BU04, O75461, Q9Y5B0, Q92878, Q6P1M3, H3BRF9, J3KNL2, Q15019, Q7Z7A1, Q9Y6X3, Q2NKX8, O94804, P40818, Q13620, Q13625, Q9BV73, O60216, Q96PU4, Q9P0W2, Q8TD19, Q15007, Q15555, Q9H6D7, Q8IX12, K4DI93, Q13111, Q8WYP5, O60583, Q7Z3K3, P57059, Q9H0Z9,…	1369	650	20581	2.08158	2.35296e-08	1.3072e-09	7.62169e-08
UP_KEYWORDS	RNA-binding	88	6.42805	9.03001e-10	Q12906, Q8N1W1, Q9Y6M1, Q9UPN6, Q8NE18, Q96J94, Q9HAU5, Q5TC82, Q9Y3Y2, Q5T481, Q9BYJ9, Q9Y5A9, Q3ZCQ8, Q8IU60, Q9BWT3, Q17RY0, Q15233, Q96PK6, Q5JTZ9, P31483, Q14671, Q6PJT7, Q9BX46, Q01780, Q96T37, O43390, Q8IUH3, Q8TEQ6, Q9UBK2, D6RJ07, Q9H6E5, P26196, Q99973, Q8TDD1, Q5SZQ8, Q9P2N5, P17844, A0A1B0GUN8, Q7Z739, Q99729, Q96EV2, O43148, E9PAU2, P35637, A0A087WY31, Q92879, Q9NW13, O15116, P62310,…	1369	665	20581	1.98941	3.93708e-07	2.07215e-08	1.2753e-06
GOTERM_CC_DIRECT	GO:0005829~cytosol	314	22.9364	3.47603e-09	Q8N1W1, G5E9C8, P46940, P80188, Q8NF50, Q9Y3P9, O75962, Q8N9B8, B2RTY4, P29692, Q13472, P78318, Q7L0Q8, P55196, O43290, O00408, Q86XR8, Q15075, P17661, Q96Q15, Q8TEQ6, O00401, P20936, P26196, Q9NWT6, P39880, P46937, W0Z7M9, Q96L93, O60216, Q9BV73, A8K8P3, Q9NYJ8, P49593, Q99570, Q8IWJ2, Q14444, Q9NQ66, Q8TAP6, O60934, Q9UDY2, Q92805, O95149, P10644, P46531, Q15311, P60006, O75886, Q8TES7, P01106,…	1280	3315	18224	1.34859	2.33936e-06	4.67873e-07	5.21446e-06
GOTERM_BP_DIRECT	GO:0000122~negative regulation of transcription from RNA polymerase II promoter	96	7.01242	4.35768e-09	Q96BD5, P51531, P42224, Q9HCK8, Q9HAU4, Q9ULV5, Q9UPN9, Q08117, Q12772, P78318, Q8IZQ8, Q12830, O95935, Q9BQA5, F5H433, Q9UMQ3, A5YKK6, P36956, O00408, Q04727, Q04724, E7EW59, Q9Y2X9, P52952, A6NEM2, P06400, O75461, Q9H1B7, Q96ST3, P15822, P35680, P17844, P39880, Q9UJQ4, O60902, O43524, O43474, Q15911, O14503, Q9H2F5, Q9UQL6, Q9UKV0, Q99967, P53539, Q8WXI9, O14497, O75925, Q9P2R6, Q99583, Q8NE35,…	1207	720	16792	1.85496	1.61538e-05	5.38463e-06	8.03163e-06
UP_KEYWORDS	Actin-binding	47	3.43316	5.47775e-09	Q765P7, Q9UPN3, Q01082, Q8N3V7, Q8IUG5, B2RTY4, Q00872, P11171, F8W9J4, O75146, Q5T1M5, Q96H55, O00401, O00160, Q9H4G0, F5GXQ8, O15020, Q8WVV4, P46939, P11277, Q13813, W0Z7M9, Q15149, P47756, P06753, P17600, P67936, O00159, Q14847, Q155Q3, P02549, O76041, Q6P5Q4, Q86TC9, H3BV44, Q7L576, Q702N8, P35749, Q9ULH7, Q8TCJ0, Q8TAM6, Q9H254, A8K0Z3, Q9Y613, A0A0A0MT60, Q9UI08, Q15746, Q8IZW8, A0A075B6E5	1369	274	20581	2.57876	2.3883e-06	1.19415e-07	7.73617e-06
GOTERM_BP_DIRECT	GO:0006366~transcription from RNA polymerase II promoter	75	5.47845	5.72104e-09	O94916, Q8TEY5, F5H0I3, Q8IZQ8, F5H433, Q9UMQ3, Q96AE4, Q7RTS1, Q68CJ9, Q03933, Q02930, O43294, E7EW59, P52952, A6NEM2, Q15714, Q9Y5B0, Q5SXM2, P15822, P31629, Q92830, Q9Y692, Q9UJQ4, O60281, Q6P4R8, Q13952, O15516, O43524, P55347, O43474, O43148, Q15911, O60216, O15164, P53539, O60583, Q96CJ1, Q99583, O75376, P61371, O75030, O75031, Q99626, O00268, P51692, P50222, P48436, P01106, Q14119, Q14872,…	1207	513	16792	2.03394	2.12077e-05	5.30196e-06	1.05444e-05
GOTERM_MF_DIRECT	GO:0044212~transcription regulatory region DNA binding	42	3.06793	8.79202e-09	P51531, Q9UGU0, O75376, Q6NUN9, Q12772, Q9BQA5, F5H433, P48380, Q96PN7, Q9HCE3, Q96SN8, P56524, Q5SZG2, E7EW59, Q9Y2X9, P52952, B0QYS6, A0A1C7CYX1, Q9HCS4, P43699, Q92786, Q5SXM2, P15822, Q9BXA9, P31629, O75541, P20226, P46937, P35712, Q9UJQ4, Q01664, Q13952, Q9H4Z2, O43474, Q15911, P19532, Q9H3D4, Q9UQL6, Q13485, Q9NSC2, O15350, Q13127, P23511	1235	213	16881	2.69526	8.5546e-06	2.13866e-06	1.38427e-05
GOTERM_MF_DIRECT	GO:0003682~chromatin binding	62	4.52885	1.32354e-08	Q96BD5, P51531, P25440, Q9HCK8, Q9BQA5, Q9UMQ3, Q15233, Q9UBG7, P36956, Q04727, Q92922, P52952, A6NEM2, Q9P2D1, Q07864, Q96ST3, Q8N0Z6, Q92830, P46937, H7C3U5, Q9UQL6, O60216, O15164, Q96L91, Q99967, Q13111, O60583, Q9P2R6, Q99583, O75179, O15405, Q9NXF1, Q15596, Q9UPP1, Q92793, P61371, F8VXC8, F6M2K4, Q93074, E9PHH0, P51692, Q14686, P56524, Q86U86, P48436, Q9H7E2, Q09472, P10071, P26367, P10070,…	1235	391	16881	2.16744	1.2878e-05	2.5756e-06	2.08386e-05
GOTERM_CC_DIRECT	GO:0005913~cell-cell adherens junction	53	3.87144	1.49811e-08	P46940, X6RLX0, Q9UPN3, Q01082, P42224, Q9Y2D8, P29692, P55196, Q6Y7W6, Q99959, A6NEM2, P42566, Q9H4G0, P26196, Q9NUQ8, P05556, Q9Y490, Q15019, O15020, Q9H2G2, Q14677, E9PMT2, Q86W92, Q13813, O60749, P40818, Q15149, P47756, A0A087WYN9, Q14847, Q9UDY2, Q9UH65, Q86UP2, Q9P2M7, Q08378, O14530, Q9UHX1, Q9UHN6, Q07157, Q9ULH7, Q5T6F2, Q9BX66, K7EKI8, P46060, P49327, Q92817, Q15942, Q86SQ0, O60763, O60…	1280	323	18224	2.33618	1.00822e-05	1.68038e-06	2.24735e-05
UP_KEYWORDS	Zinc	223	16.2893	2.01904e-08	Q8N1W1, Q96BD5, B2RTY4, Q13472, P55197, Q9UGL1, Q02086, O43294, Q15075, D6RJ07, Q8IYY4, Q07075, Q9C0D4, Q969V5, Q5T4S7, Q9P2N5, Q9P2N4, E9PMT2, Q9Y692, P46939, P55198, Q9H4Z2, P22413, O43474, J9JID5, Q9UQL6, Q9UKV0, Q8WXI9, Q9NYJ8, Q04609, P41229, Q5TAX3, Q92793, Q92804, Q96H72, Q9UDY6, Q86UP3, Q96AP4, Q96PN7, O75976, P10071, Q13233, P10070, Q9ULJ6, Q9BXA9, Q5BKZ1, Q9NQV6, Q6GQQ9, Q9UMN6, Q8IWZ5,…	1369	2348	20581	1.42781	8.80298e-06	4.19191e-07	2.85147e-05
GOTERM_MF_DIRECT	GO:0003700~transcription factor activity, sequence-specific DNA binding	118	8.61943	2.17536e-08	P27540, Q9ULV5, Q8TEY5, P51449, F5H0I3, A0A1W2PQJ7, O00287, Q96AE4, P55197, Q9UGL1, Q9UBG7, P12524, P52952, A6NEM2, Q15714, B0QYS6, P06400, B7ZBM3, Q00577, Q5SXM2, P35680, Q13952, O15516, O43524, Q99729, Q2KHR2, W0Z7M9, O43474, Q15911, O14503, P08235, Q14789, J3KQC0, Q8WXI9, Q02446, Q8WYP5, Q6NUN9, O15409, B0ZBF6, Q92793, Q9Y250, P46531, O00268, Q96PN7, Q5SZG2, P01106, Q03060, P43699, P10071, Q92…	1235	961	16881	1.67838	2.1166e-05	3.5277e-06	3.42501e-05
UP_KEYWORDS	Zinc-finger	178	13.0022	2.29827e-08	Q8N1W1, Q96BD5, Q8WYQ9, Q5TC82, B2RTY4, P52594, Q9UPN9, P36406, P51449, P49916, Q12830, O60293, A0A1W2PQJ7, P55197, Q9UGL1, A0A087WW39, Q02086, Q15075, P15056, P36508, Q96S99, D6RJ07, Q8IYY4, B7ZBM3, Q5VZL5, Q9C0D4, Q9H1B7, P15822, Q969V5, Q5T4S7, A0A0C4DFM2, H3BRF9, Q9P2N5, A0A0D9SFM0, P46939, P55198, O60281, Q70EL2, Q9H4Z2, O15016, O43474, Q15911, J9JID5, Q6ZN54, P08235, Q96ME7, Q8WXI9, Q9NYJ8,…	1369	1781	20581	1.50252	1.00204e-05	4.55476e-07	3.24583e-05
GOTERM_MF_DIRECT	GO:0003677~DNA binding	180	13.1483	6.69578e-08	Q12906, Q16531, G5E9C8, P27540, Q96A47, Q9Y3P9, Q9BW11, P52594, Q9UPN9, P29692, P51449, Q13472, F5H0I3, Q3T8J9, P49916, O00287, P55197, Q9UGL1, Q92466, Q02086, A0A087WSV8, P12524, Q92922, P52952, P36508, P06400, Q5VZL5, Q9C0D4, P15822, Q92878, Q5SXM2, A0A0C4DFM2, P35680, P80303, Q9Y692, A0A0D9SFM0, O60281, Q2NKX8, Q13952, O43524, O15516, Q2KHR2, Q68DE3, J9JID5, Q9NXL9, Q9P0W2, O94842, Q8TAK6, Q96…	1235	1674	16881	1.46977	6.51478e-05	9.30709e-06	0.000105422
GOTERM_BP_DIRECT	GO:0006351~transcription, DNA-templated	201	14.6822	7.43494e-08	Q96BD5, P27540, Q7Z589, P29692, P55197, Q9UBG7, Q9UGL1, Q02086, Q92922, Q13772, O00401, Q9P2D1, Q9C0D4, Q00577, Q9NWT6, P39880, Q9H4Z2, W0Z7M9, J9JID5, Q9UQL6, Q9UKV0, J3KQC0, Q8WXI9, P41229, Q15596, F8VXC8, Q86UP3, Q96PN7, Q9NWA0, Q5SZG2, Q9BQG0, Q03060, P43699, Q9ULH7, P26367, Q92786, Q9ULJ6, Q5BKZ1, Q9NQV6, Q9UMN6, P35712, Q9BQ70, Q8NFW5, O15350, A0A0C4DG53, Q76L83, Q9C0A1, Q5VVH5, Q4VX54, Q8I…	1207	1955	16792	1.43036	0.000275575	5.51211e-05	0.000137033
UP_KEYWORDS	Mental retardation	47	3.43316	8.49958e-08	P51531, Q8NF50, Q8IZU9, Q6UB99, F5H0I3, P78318, Q96IJ6, Q15233, Q96SN8, A6NEM2, A0A087X0R0, P15056, O43379, Q9H4G0, Q8N4C6, Q00577, O94986, Q9H4Z2, Q13813, Q2M1P5, Q13620, Q12955, O60216, P55291, Q9NW13, Q8WXI9, K4DI93, Q7Z3K3, O14497, C9J066, Q9UNP4, Q9BYW2, P41229, Q71SY5, Q8NG31, Q9UPP1, P42658, Q93074, Q96F86, E9PHH0, P56524, P42345, Q8IWS0, P46100, P35711, Q6KC79, Q7Z6Z7, Q6RI45, A7XYQ1, Q13…	1369	299	20581	2.36314	3.70575e-05	1.61122e-06	0.000120039
UP_KEYWORDS	Biological rhythms	27	1.97224	1.61141e-07	P41229, P57059, P08138, Q15596, P51449, Q92793, A0A1W2PQJ7, P78527, Q15233, Q9UGL1, Q8TC92, Q99743, Q9BQG0, Q03060, P43699, Q9UBK2, Q92786, Q09472, Q96ST3, P17844, P35398, O15516, Q6UUV9, O14503, Q92753, Q14103, J3KQC0, A0A0C4DG53, P23511	1369	125	20581	3.24726	7.0255e-05	2.92739e-06	0.000227577
UP_KEYWORDS	Chromatin regulator	45	3.28707	1.78704e-07	P41229, Q96BD5, P25440, Q7Z589, Q9HCK8, Q68CP9, O75177, O75376, Q9UPP1, Q5T5X7, Q12830, F8VXC8, Q4VX54, Q52LR7, Q9UGL1, Q9H7L9, P46379, P56524, Q8NEZ4, Q86U86, Q8N9N5, Q92922, Q9Y5T5, Q9H7E2, Q3L8U1, A6NEM2, A0A087X0R0, Q9P2D1, P06400, Q08999, Q15652, P46100, Q9UMN6, Q70CQ1, Q9H2F5, P04150, Q9UQL6, Q9P0W2, Q9UKV0, Q9Y6J0, Q96L91, A0A087X169, Q68DK7, O14497, Q9BYW2	1369	287	20581	2.35718	7.79121e-05	3.1166e-06	0.000252382
GOTERM_CC_DIRECT	GO:0005667~transcription factor complex	36	2.62966	1.84672e-07	P27540, Q9GZV5, F6M2K4, P78527, Q9UMQ3, Q96PK6, Q9UBG7, P48380, Q96PN7, Q99743, Q14686, Q9UGP4, P52952, Q03060, A0A1C7CYX1, Q9HCS4, Q08999, P43699, O75461, Q09472, Q96ST3, Q9HBZ2, P46937, P35680, Q6P1K2, Q7Z6R9, O15516, Q8NFW5, P55347, Q14209, Q15911, Q9H3D4, Q13485, Q16656, Q9UKV0, P20265, O15350, J3KQC0	1280	193	18224	2.6557	0.000124276	1.77547e-05	0.000277029
GOTERM_MF_DIRECT	GO:0098641~cadherin binding involved in cell-cell adhesion	48	3.50621	1.95066e-07	X6RLX0, P46940, Q9UPN3, Q01082, P42224, P29692, Q9UDY2, Q9UH65, Q86UP2, Q9P2M7, P55196, Q08378, Q6Y7W6, O14530, Q9UHX1, Q9UHN6, Q99959, A6NEM2, Q07157, P42566, Q9H4G0, P26196, Q9ULH7, Q5T6F2, Q9NUQ8, Q9Y490, P05556, K7EKI8, P46060, Q15019, Q9H2G2, O15020, P49327, Q14677, Q92817, Q86W92, Q13813, Q86SQ0, O60749, P40818, Q15149, O60763, P47756, O60664, A0A087WYN9, A0MZ66, P53365, Q14847	1235	290	16881	2.26243	0.000189781	2.37246e-05	0.000307122
UP_KEYWORDS	Cell division	55	4.01753	2.00506e-07	Q9NR09, Q13042, Q96EA4, A8MVW5, Q9C099, Q96R06, P49916, Q96PY6, Q9Y5T5, Q8N137, Q86T82, O00401, H3BU04, Q9Y5B0, Q6P1M3, H3BRF9, J3KNL2, Q15019, Q7Z7A1, Q9Y6X3, Q2NKX8, O60216, Q8TD19, Q15555, Q9H6D7, Q8WYP5, O60583, Q7Z3K3, P30279, Q96RW7, Q8NG31, Q9NVA2, O60566, Q8TEW0, Q9NRM7, P60006, O75935, Q14980, O14578, Q9BWU1, Q96HI0, Q9Y6D9, O14777, O75449, P48729, Q6P1K2, Q8WVK7, Q9ULW0, Q96Q89, O95271,…	1369	388	20581	2.13105	8.74167e-05	3.36232e-06	0.000283172
GOTERM_BP_DIRECT	GO:0098609~cell-cell adhesion	45	3.28707	2.75718e-07	X6RLX0, P46940, Q9UPN3, Q01082, P42224, P29692, Q9UDY2, Q9UH65, Q86UP2, Q9P2M7, Q08378, P55196, Q6Y7W6, O14530, Q9UHX1, Q9UHN6, A6NEM2, Q07157, P42566, Q9H4G0, P26196, Q9ULH7, Q5T6F2, Q9NUQ8, K7EKI8, P46060, Q15019, Q9H2G2, O15020, P49327, Q14677, Q92817, Q86W92, Q13813, Q86SQ0, O60749, P40818, Q15149, O60763, P47756, O60664, A0A087WYN9, A0MZ66, P53365, Q14847	1207	271	16792	2.31014	0.00102157	0.000170334	0.000508175
GOTERM_CC_DIRECT	GO:0043231~intracellular membrane-bounded organelle	73	5.33236	3.57241e-07	Q9UPN4, P51531, P52594, Q9Y3Y2, Q9UPN9, P51449, Q8IU60, P35568, Q8TC71, Q9Y4E1, D6REX3, O75146, A0A0A0MT16, A5YKK6, Q9NRA8, Q9UKG9, Q15036, Q13137, Q13895, P15056, P42566, Q12981, P26196, H3BU04, Q9H5N1, Q96T51, Q6P1M3, Q14677, Q99424, Q9UJQ4, Q8NDX5, Q8WWZ7, O15516, Q13813, P08069, O43933, Q15911, Q9Y2G4, P98082, P22670, Q13111, O15400, A0A0G2JPI4, Q9Y3R4, Q969W9, Q9NX95, Q92805, F6M2K4, P46379,…	1280	558	18224	1.86261	0.000240394	3.00524e-05	0.000535902
GOTERM_MF_DIRECT	GO:0043565~sequence-specific DNA binding	71	5.18627	3.96213e-07	P27540, Q96A47, Q9ULV5, Q8TEY5, Q9C0A1, P51449, Q12830, F5H433, Q03933, Q02930, E7EW59, Q9UPW0, Q9Y2X9, P52952, Q9HCS4, Q9UBK2, B7ZBM3, Q5SXM2, P15822, P31629, P35680, P39880, Q9UJQ4, O60902, P35398, O15516, P55347, O43524, Q99729, Q9H2Z4, P08235, O15164, Q14789, J3KQC0, P53539, Q8WXI9, Q9P2R6, Q9NWH9, Q8N5A5, O15409, B0ZBF6, P61371, O43365, Q86UP3, Q99626, P46531, Q9HCE3, P50222, P56524, Q96RI1,…	1235	518	16881	1.87353	0.000385441	4.28341e-05	0.000623819
UP_KEYWORDS	Bromodomain	14	1.02264	7.42382e-07	P25440, P51531, Q09472, Q9NSI6, Q6PL18, Q9UPN9, Q92830, Q92793, Q12830, Q9UIF8, Q6RI45, O15016, Q86U86, O15164	1369	39	20581	5.39668	0.000323626	1.1988e-05	0.00104845
GOTERM_CC_DIRECT	GO:0005814~centriole	25	1.82615	8.36316e-07	Q8IY31, Q8TAP6, Q9C099, Q6UVJ0, Q5T7B8, Q8TCU4, Q8N960, Q8TES7, Q8N137, Q5TB80, Q96LK0, O43379, A0A087WTU9, Q5SW79, Q8IYY4, Q96CW5, Q8N4C6, Q9C0D2, Q15154, Q5TZA2, A8K0Z3, O94986, Q9BV73, A8K8P3, Q9UPV0, Q9UJT2, C9J066	1280	113	18224	3.14989	0.000562682	6.25359e-05	0.00125457
GOTERM_MF_DIRECT	GO:0003779~actin binding	45	3.28707	9.28023e-07	Q9UPN3, Q01082, Q8N3V7, Q8IUG5, B2RTY4, Q00872, P11171, Q9Y4G6, Q6P5Q4, F8W9J4, Q9P2M7, Q86TC9, P40123, H3BV44, Q9UJC3, Q8IVE3, Q702N8, Q5T1M5, Q96H55, O00401, O00160, Q8TCJ0, Q9H4G0, P05556, Q9BX66, F5GXQ8, Q8NI77, O15020, Q8WVV4, Q9H254, Q5TZA2, P46939, P11277, A8K0Z3, Q13813, Q9Y613, A0A0A0MT60, W0Z7M9, Q15149, Q9UI08, Q15746, P47756, Q8IZW8, P17600, O00159, A0A075B6E5, Q155Q3	1235	278	16881	2.21258	0.000902559	9.02926e-05	0.00146112
GOTERM_BP_DIRECT	GO:0045892~negative regulation of transcription, DNA-templated	67	4.89408	9.78691e-07	Q12906, P51531, Q9HCK8, Q9HAU4, Q9BW11, Q9UPN9, Q08117, Q3T8J9, Q9BQA5, Q8IY57, Q4VX54, Q15233, Q9UGL1, Q04724, Q96T37, Q9Y2X9, P52952, Q9UGP4, P06400, O43520, Q00577, Q96ST3, O15516, A0A087WW73, O43474, O14503, Q15911, Q9H2F5, Q9UQL6, Q9UKV0, O15164, P98082, Q99967, J3KQC0, P49593, P41229, Q8N5A5, Q9NQ66, Q6NUN9, O15409, F8VXC8, P46531, P51397, Q9H7L9, P48380, P56524, P48436, Q9BQG0, O75381, Q03…	1207	499	16792	1.86797	0.00362143	0.000518153	0.00180381
GOTERM_CC_DIRECT	GO:0000922~spindle pole	24	1.7531	1.58688e-06	A0A087WTU9, O43379, Q9NR09, Q96CW5, Q9Y6D9, Q1MSJ5, Q9Y5B0, Q8N4C6, Q99569, Q96EA4, P46060, O75449, Q96R06, Q9ULW0, Q9NRM7, O95271, Q6P2H3, Q96SN8, Q8TCU4, Q8TES7, O00139, Q9Y4B5, Q9Y6K9, Q14980, C9J066, Q96LK0	1280	109	18224	3.13486	0.0010674	0.000106791	0.00238048
GOTERM_MF_DIRECT	GO:0003714~transcription corepressor activity	36	2.62966	1.63244e-06	Q99583, Q9ULV5, O75376, Q08117, Q9GZV5, Q3T8J9, Q01658, Q4VX54, Q8IY57, Q99626, Q9UGL1, Q04727, P56524, Q96RI1, Q9BQG0, Q9UGP4, Q9Y2X9, O75381, Q96HA7, O75461, Q92786, A0A087WWT6, Q9H2X6, Q9H4I2, Q8TDD1, P46937, O43251, Q14207, O14503, B0QYV1, Q9UKV0, Q14106, P24468, Q99967, Q96AQ6, Q8IX12, O75925	1235	203	16881	2.42403	0.00158711	0.000144387	0.00257018
GOTERM_BP_DIRECT	GO:0006357~regulation of transcription from RNA polymerase II promoter	60	4.38276	2.53474e-06	P51531, P25440, Q9ULV5, P42229, Q9UBG7, P36956, Q03933, Q02086, Q9UPW0, Q92922, Q9Y5T5, P52952, P36508, A0A1C7CYX1, P06400, Q9HCS4, P08476, B7ZBM3, Q9C0D4, Q5VZL5, Q00577, Q96RN5, Q5SXM2, Q9NSI6, Q92830, Q2TAL8, P39880, P17844, Q9Y692, Q13952, O15516, O43524, O60244, Q2KHR2, P09525, O60216, P22670, P53539, O14497, Q02446, Q9NWH9, P61371, F8VXC8, O75030, P10644, Q52LR7, Q96PN7, O00268, Q9NWA0, P51…	1207	441	16792	1.89281	0.00935229	0.00117385	0.00467168
UP_KEYWORDS	Microtubule	41	2.99489	3.91435e-06	J3KQA9, Q86VH2, Q9UPN3, Q08AD1, G3V140, Q9UIF3, Q96R06, F8W9J4, Q5T5Y3, Q9NS87, Q96SN8, Q9P2D7, Q5T7B8, Q9UJC3, Q86XR8, Q14980, Q5TB80, Q07866, A0A075B6F3, O95235, Q5SW79, Q96CW5, Q1MSJ5, Q8N4C6, Q6EMB2, Q9UFH2, Q5JR59, O95239, Q96N16, Q8NI77, O75449, Q8WVK7, Q96Q89, Q9ULW0, Q14679, H7BYN4, Q96L93, O00139, Q15555, Q9H6D7, Q96AQ6, E9PGC8, C9J066	1369	280	20581	2.20135	0.0017052	6.09502e-05	0.00552805
UP_KEYWORDS	DNA damage	48	3.50621	3.91741e-06	Q16531, Q7Z589, Q86WJ1, P49916, Q15233, Q99743, Q92466, Q96Q15, Q9UGP5, Q9NVH2, Q07864, H3BU04, Q92878, Q8N0Z6, Q96FW1, Q9UBZ9, A0A0D9SFM0, P39748, Q6P4R8, O15516, P54727, Q13620, O60216, Q9NXL9, Q99638, K4DI93, Q13111, O60934, P43351, P78527, Q9Y253, Q13315, Q52LR7, Q8N3C0, P29372, O60673, Q9Y6K9, Q96SD1, P27694, Q96HA7, P46100, Q9H2X6, P15336, Q7Z6Z7, Q13535, Q9UPV0, Q96K76, Q68DK2, P51587	1369	352	20581	2.05004	0.00170654	5.88946e-05	0.00553237
UP_KEYWORDS	Mitosis	39	2.84879	4.68484e-06	Q9NR09, Q13042, Q96EA4, Q8NG31, A8MVW5, Q96R06, Q9C099, O60566, Q9NRM7, Q96PY6, P60006, O75935, Q9Y5T5, Q14980, Q86T82, O14578, O00401, H3BU04, Q9Y6D9, Q9Y5B0, O14777, Q15019, O75449, P48729, Q8WVK7, Q9Y6X3, Q6P1K2, Q96Q89, Q9ULW0, Q2NKX8, O95271, H7BYN4, P04150, O60216, Q9UPV0, Q8TD19, O00139, Q15555, Q9H6D7	1369	262	20581	2.23783	0.00204051	6.80842e-05	0.00661615
GOTERM_CC_DIRECT	GO:0000932~cytoplasmic mRNA processing body	19	1.38787	5.64626e-06	Q9NPJ4, P26196, Q9UPQ9, Q8NDV7, Q5TC82, Q14444, Q9Y5A9, Q8IU60, Q9UPU9, Q9BX70, Q8IZD4, Q96F86, A5YKK6, Q9NRA8, Q14671, Q86TB9, Q9UGP4, O15116, P62310	1280	78	18224	3.46811	0.00379273	0.00034539	0.00846973
UP_KEYWORDS	ATP-binding	135	9.86121	7.03684e-06	P51531, Q9H0A0, Q9NWZ5, Q8IUG5, Q9NWZ3, O75962, Q86WJ1, B2RTY4, Q14289, Q9BWT3, P49916, Q96PY6, O43318, A0A0A0MT16, Q9P2D7, Q38SD2, Q96Q15, Q9P2D1, P15056, O00160, P26196, P51828, O43520, Q9NUQ8, Q92878, Q99973, Q8TDD1, P17844, A0A0D9SFM0, Q2NKX8, Q2TB90, Q2M1P5, Q14679, Q96L93, O43283, Q9NXL9, Q8TD19, Q9NU22, A0A087WYN9, Q86UK0, Q96L91, O00159, Q99570, P34932, O14920, H0Y493, P49336, Q9Y385, Q9H…	1369	1391	20581	1.45905	0.00306337	9.89652e-05	0.0099376
GOTERM_BP_DIRECT	GO:0006461~protein complex assembly	24	1.7531	7.06015e-06	P63027, P02671, Q9UBK2, O14910, Q14289, Q92793, Q5TC12, Q01664, O00505, O75030, Q8TEW0, P04233, P07814, Q9NU22, P48436, Q99747, Q9BWT7, O15273, Q8TDM6, Q8TEQ6, O75381, Q13111, O00401, P32243	1207	116	16792	2.87838	0.0258326	0.00290379	0.0130118
GOTERM_MF_DIRECT	GO:0001105~RNA polymerase II transcription coactivator activity	13	0.949598	7.33658e-06	P51531, Q9ULH7, Q86YW9, Q9H2X6, Q92793, P61371, Q8IZQ8, Q15788, Q93074, W0Z7M9, P20265, Q99967, Q9P2R6	1235	37	16881	4.80256	0.0071131	0.000594699	0.0115505
GOTERM_CC_DIRECT	GO:0005643~nuclear pore	18	1.31483	7.35459e-06	O00629, Q9Y6D9, Q9BVL2, P52594, Q9C0E2, Q9UIA9, P46060, P52948, O00505, O95149, O95271, O75694, Q9H2T7, P52292, Q53GS7, O00159, E7ESC6, Q8WYP5, Q99570	1280	72	18224	3.55937	0.00493743	0.000412386	0.0110322
GOTERM_CC_DIRECT	GO:0008091~spectrin	7	0.511322	8.25153e-06	Q01082, O15020, Q9H254, P11171, P11277, P02549, Q13813	1280	9	18224	11.0736	0.00553791	0.000427086	0.0123776
GOTERM_BP_DIRECT	GO:0006338~chromatin remodeling	20	1.46092	8.58908e-06	P06400, P51531, P46100, Q86WJ1, Q92830, Q12830, F8VXC8, Q4VX54, P03372, Q7KZ85, Q9UQL6, Q9H3D4, P56524, Q86U86, P48436, Q92922, P01106, O14497, Q9P2D1, Q9P2R6	1207	86	16792	3.23539	0.0313383	0.00317892	0.0158293
GOTERM_BP_DIRECT	GO:0055007~cardiac muscle cell differentiation	11	0.803506	9.5774e-06	Q92574, P57059, Q92786, P05556, Q8IY31, Q92830, P52952, Q12802, P35712, Q8IZQ8, O14497	1207	27	16792	5.66792	0.0348807	0.0032224	0.0176506
GOTERM_MF_DIRECT	GO:0001047~core promoter binding	17	1.24178	1.03047e-05	P06400, P43699, Q14872, Q09472, O15516, O43524, Q14209, Q15233, P46531, O43474, Q99743, Q9UQL6, P56524, Q9BQG0, Q9Y2X9, Q8IX12, Q13127	1235	64	16881	3.63078	0.00997638	0.00077097	0.016223
GOTERM_BP_DIRECT	GO:0051301~cell division	49	3.57925	1.11413e-05	Q9NR09, Q13042, Q96EA4, A8MVW5, Q96R06, Q9C099, P49916, Q96PY6, Q9Y5T5, Q86T82, O00401, P06400, H3BU04, Q9Y5B0, Q6P1M3, J3KNL2, H3BRF9, Q15019, Q7Z7A1, Q9Y6X3, Q2NKX8, O60216, Q8TD19, Q15555, Q9H6D7, O60583, Q7Z3K3, P30279, Q96RW7, Q8NG31, Q9NVA2, O60566, Q9NRM7, P60006, Q14980, Q9BWU1, Q96HI0, Q9Y6D9, O14777, O75449, P48729, Q6P1K2, Q8WVK7, Q9ULW0, Q96Q89, O95271, P04150, Q9UPV0, O00139	1207	350	16792	1.94771	0.0404597	0.00343583	0.0205325
GOTERM_BP_DIRECT	GO:0016569~covalent chromatin modification	23	1.68006	1.50357e-05	P06400, Q08999, P25440, Q7Z589, Q9HCK8, Q68CP9, O75177, P46100, O75376, Q12830, F8VXC8, Q4VX54, P46379, P04150, Q86U86, Q8N9N5, Q92922, Q9Y6J0, Q9H7E2, A0A087X169, Q3L8U1, O14497, Q9P2D1	1207	113	16792	2.83168	0.0542128	0.00427834	0.0277086
UP_KEYWORDS	Proto-oncogene	35	2.55661	1.68126e-05	P07332, P07333, P10911, Q9GZV5, Q92804, D6REX3, P55196, P55197, Q6J9G0, A0A087WW39, Q96T37, P04629, P01106, Q15532, Q5M775, P35749, Q13772, P15056, P42566, P26196, A0A087WWT6, Q13107, H3BRF9, Q15154, P46937, P55198, Q15788, O43524, Q16559, W0Z7M9, Q92734, P06753, P19532, O15068, P35637, Q12802	1369	236	20581	2.22956	0.00730354	0.000229047	0.0237416
GOTERM_MF_DIRECT	GO:0008270~zinc ion binding	124	9.05771	1.98934e-05	Q96BD5, Q8WYQ9, Q96A47, Q8NDL9, Q5TC82, P36406, Q9UPN9, Q13472, P51449, P49916, Q12830, A0A1W2PQJ7, P55197, Q9UGL1, A0A087WW39, O43294, Q15075, D6RJ07, Q07075, Q5VZL5, Q969V5, Q5T4S7, Q9NWT6, Q9P2N4, E9PMT2, A0A0D9SFM0, P46939, P55198, Q70EL2, P22413, O43474, O15016, Q15911, P08235, Q8WXI9, Q9NYJ8, Q8TE57, P41229, Q5TAX3, A0A0G2JPI4, Q9UPP1, B0ZBF6, Q92793, O00463, Q92804, Q9UIF8, Q9UDY6, Q86UP3,…	1235	1169	16881	1.4499	0.0191703	0.00138165	0.0313167
GOTERM_BP_DIRECT	GO:0030521~androgen receptor signaling pathway	13	0.949598	1.99362e-05	P06400, Q9UBK2, Q9NPJ6, Q969W9, Q15788, Q4VX54, O60244, Q93074, Q9UHV7, O43294, O14497, O75925, Q13772	1207	41	16792	4.41118	0.0712393	0.00526496	0.0367379
GOTERM_BP_DIRECT	GO:0006367~transcription initiation from RNA polymerase II promoter	27	1.97224	2.92899e-05	Q71SY5, P49336, Q9GZV5, P51449, B0ZBF6, Q92793, F6M2K4, Q93074, Q9UHV7, P46531, O00268, Q14686, Q96RI1, Q92585, Q9UBK2, Q9NPJ6, Q96RN5, P20226, P46937, P35398, O60244, Q14209, P03372, Q9UHY1, P04150, P08235, Q92753, A0A0C4DG53, A0A140T9R5, P52655	1207	152	16792	2.47124	0.102892	0.00721247	0.0539703
GOTERM_BP_DIRECT	GO:0006397~mRNA processing	30	2.19138	2.99607e-05	Q9H0Z9, Q9UPN6, Q9H0D6, Q969L4, Q9C0J8, O15234, Q5T481, Q15233, Q6PJT7, Q9UHX1, O43390, Q92945, O75934, Q6P2Q9, Q9UBK2, Q5BKZ1, Q9P2N5, O14893, A0A1B0GUN8, O43251, Q6PIY7, B0QYV1, Q7KZ85, O43143, Q15007, Q5VTL8, Q9NW13, Q92879, O15116, Q15459, P62310	1207	179	16792	2.33165	0.10512	0.00691759	0.0552062
UP_KEYWORDS	Metal-binding	299	21.8408	3.43206e-05	Q96BD5, Q8N1W1, Q9UK59, B2RTY4, Q13472, Q7L0Q8, P55197, Q9UGL1, O00408, Q02086, O43294, Q15075, Q38SD2, Q96Q15, P98160, D6RJ07, Q07075, Q8IYY4, P98164, Q9C0D4, Q969V5, Q5T4S7, Q9NWT6, Q9P2N5, Q9P2N4, E9PMT2, Q9UBZ9, Q9Y692, P46939, P55198, Q9H4Z2, P22413, O43474, J9JID5, O43283, Q9UQL6, Q9UKV0, Q8WXI9, Q9NYJ8, P49593, Q04609, P41229, Q02818, Q5TAX3, Q92793, Q92804, Q15878, Q9UDY6, Q86UP3, P46531,…	1369	3640	20581	1.2349	0.0148526	0.000453353	0.0484597
UP_KEYWORDS	Cell projection	77	5.62454	4.35236e-05	Q9UPN4, Q765P7, Q9UPN3, Q9UL16, Q5SY18, Q8N3V7, O43556, Q14289, Q15811, Q9Y2D8, Q9NPE6, F8W9J4, Q7L0Q8, Q17RY0, P16389, Q9P2D7, Q8TCU4, Q9H4E7, Q5T1M5, Q96LK0, Q07866, Q8IYY4, O43520, P05556, Q9Y490, P22459, Q6EMB2, Q96M91, A0A087WX34, Q15019, Q15154, O60749, Q14679, Q2M1P5, Q12955, Q9UHY1, Q9BV73, Q5EBL4, O00159, Q86VH2, Q8NE35, Q96JI7, Q9Y5C1, Q4G0U5, Q96M29, Q8IY31, Q14444, Q2MV58, Q9NVA2, Q9U…	1369	721	20581	1.60553	0.0187978	0.000557983	0.0614504
GOTERM_MF_DIRECT	GO:0008134~transcription factor binding	41	2.99489	4.7682e-05	P27540, Q71SY5, Q15596, O60934, Q92793, Q01658, Q8IZQ8, Q12830, Q4VX54, P78527, O00268, Q96PN7, Q04724, P56524, Q96KQ4, Q9BQG0, P01106, P52952, A0A1C7CYX1, P06400, Q9UBK2, Q00577, P26367, Q09472, P25963, Q92830, P20226, Q13952, P35398, O43251, Q14209, P03372, B0QYV1, Q9UQL6, Q9UKV0, Q92753, O15350, Q14103, P53539, A0A0C4DG53, O75925, Q13127, P52655	1235	284	16881	1.97332	0.0453358	0.00308827	0.0750469
GOTERM_MF_DIRECT	GO:0008017~microtubule binding	33	2.41052	4.84366e-05	J3KQA9, Q86VH2, Q9UPN3, P07332, Q8IWC1, G3V140, Q9NX95, Q9Y250, Q5T5Y3, Q9NS87, Q96SN8, Q5T7B8, Q9UJC3, Q9H7U1, Q86XR8, Q9Y3E1, A0A5E8, O75381, Q14980, O95235, Q5JR59, O95239, A0A024R216, Q96N16, Q8NI77, O75449, Q8WVK7, Q96Q89, Q2M1P5, H7BYN4, Q96L93, O00139, Q15555, Q9Y4B5, E9PGC8	1235	208	16881	2.16861	0.0460366	0.00294129	0.0762342
GOTERM_CC_DIRECT	GO:0005856~cytoskeleton	48	3.50621	6.00112e-05	Q9UPN3, Q9Y6M1, O43556, Q14289, Q9NPE6, P11171, F8W9J4, Q5T124, O75146, Q96SN8, O43294, Q13137, Q8NBH2, Q9H4E7, Q9H4G0, Q99569, Q9C0D2, F5GXQ8, Q16586, P46939, Q92574, Q15149, Q6XZF7, P47756, P06753, P67936, Q9Y4B5, E9PE96, Q92608, P10911, Q2MV58, Q9NX95, Q9UH65, Q8TEW0, Q8IVE3, Q9Y6V0, A0A5E8, Q99996, Q8TAM6, K7EKI8, Q92817, Q9Y613, E7ERW7, Q13326, Q9UI08, P49023, Q8IZW8, Q15643, A0A075B6E5, Q9U…	1280	371	18224	1.84205	0.039584	0.00288076	0.0899863
UP_KEYWORDS	DNA repair	39	2.84879	6.07491e-05	Q16531, Q7Z589, Q86WJ1, O60934, P49916, P43351, P78527, Q9Y253, Q15233, Q52LR7, Q92466, Q8N3C0, O60673, P29372, Q9UGP5, Q96Q15, Q96SD1, P27694, Q96HA7, Q07864, Q92878, P46100, Q8N0Z6, Q9UBZ9, Q96FW1, Q7Z6Z7, A0A0D9SFM0, Q6P4R8, P39748, P54727, Q13535, Q13620, O60216, Q9NXL9, Q9UPV0, Q96K76, Q68DK2, P51587, Q13111, K4DI93	1369	293	20581	2.00106	0.0261397	0.000756498	0.0857612
GOTERM_MF_DIRECT	GO:0016887~ATPase activity	30	2.19138	6.24963e-05	Q9UPN3, P51531, Q86VH2, Q86WJ1, F8W9J4, A0A0A0MT16, Q15311, O95477, Q9NS87, Q9P2D7, Q5T7B8, O76031, O94911, Q96H55, A0A075B6F3, O95235, Q8NE71, Q9NUQ8, Q92878, Q9UFH2, Q6PL18, Q96Q89, Q8WWZ7, Q2M1P5, H7BYN4, Q9NU22, P10909, Q86UK0, O00139, Q9H7F0	1235	183	16881	2.24079	0.0589988	0.00357072	0.0983526
GOTERM_MF_DIRECT	GO:0003705~transcription factor activity, RNA polymerase II distal enhancer sequence-specific binding	16	1.16874	6.45549e-05	P43699, P27540, Q92786, Q00577, P15336, P35680, Q01664, P55347, O14503, P48380, Q15911, Q04727, Q96RI1, P48436, P52952, P22670	1235	66	16881	3.31365	0.0608819	0.00348358	0.101591
GOTERM_MF_DIRECT	GO:0000166~nucleotide binding	47	3.43316	6.59559e-05	Q8NE35, Q9UPN6, Q9H0Z9, Q9Y6M1, Q9NWH9, O95104, Q86WJ1, Q5T481, Q92804, Q17RY0, Q15233, Q96PK6, Q9BTD8, P31483, Q8TC92, Q9UHX1, Q9BX46, O60673, Q96T37, Q01780, O43390, Q8IUH3, P78332, O00425, O14979, Q9UBK2, Q6XE24, Q9H6E5, O60266, Q07864, Q8NDV7, Q9UPQ9, D6RBZ0, Q9P2N5, Q5SZQ8, A0A1B0GUN8, O43251, Q99729, P52756, Q9HCJ3, Q96EV2, A0A087WXL6, B0QYV1, A0A1B0GU24, E9PAU2, P35637, Q14103, Q92879, Q9N…	1235	348	16881	1.84608	0.0621612	0.00337205	0.103794
GOTERM_MF_DIRECT	GO:0016922~ligand-dependent nuclear receptor binding	9	0.657414	6.85091e-05	Q9UBK2, Q92786, O75376, Q96RI1, Q15596, O15164, P61371, O14497, Q15788	1235	21	16881	5.85807	0.0644884	0.00332754	0.10781
UP_KEYWORDS	Cell junction	72	5.25931	8.26521e-05	Q5SY18, Q8N3V7, Q14289, Q15811, Q9Y2D8, P0CAP2, F8W9J4, Q7L0Q8, Q17RY0, P55196, P16389, P23763, O43294, Q9UGP4, Q99959, Q96CX2, Q9C0D5, O00161, O14910, Q99569, P05556, Q9Y490, Q68CZ2, A0A087WX34, Q8WVV4, P46939, P11230, Q86SS6, Q15149, Q6XZF7, Q12955, P0CAP1, Q08554, Q14126, Q96EV8, P17600, E9PE96, Q155Q3, Q0VF96, Q8NE35, P07332, Q86VH4, Q96RW7, O00468, Q9NVA2, Q9UDY2, Q9Y4G6, Q9Y250, Q8TEW0, Q9C…	1369	675	20581	1.60358	0.0353962	0.00100055	0.116665
GOTERM_CC_DIRECT	GO:0005819~spindle	22	1.60701	9.76217e-05	P06400, O95235, Q5SW79, Q96CW5, Q13042, Q9Y5B0, Q1MSJ5, Q9Y6D9, Q8IWC1, Q15019, A8MVW5, O75449, Q9ULW0, Q13315, H7BYN4, P33981, Q9NS87, P04150, O75935, Q9H6D7, Q5TB80, Q14980	1280	121	18224	2.58864	0.0635907	0.00437059	0.146344
GOTERM_CC_DIRECT	GO:0016592~mediator complex	11	0.803506	0.000101468	Q96PK6, Q9UHV7, Q9NPJ6, P10071, Q96RN5, Q86YW9, Q9NWA0, B4DUA7, P49336, O60244, Q93074	1280	35	18224	4.47464	0.066012	0.00425914	0.152107
GOTERM_CC_DIRECT	GO:0043234~protein complex	51	3.72535	0.000106483	P46940, Q01082, Q9HCK8, Q9Y2D8, P11171, Q6ZSG1, P55197, P36956, Q92466, Q15036, Q92922, P35354, Q96JB5, Q15154, Q9UJQ4, P46939, P39748, P11277, O60749, Q92574, Q9UQL6, Q9BV73, P10909, Q8WXI9, Q13111, P49593, Q9UBN4, Q8TAP6, P49336, Q9UMX0, P43351, F8VXC8, O75030, P10644, Q8TEW0, Q99626, P56524, Q5T7B8, P48436, P04629, P01106, O75381, Q969H0, P12110, Q8IX03, P12109, P04150, Q9H3D4, Q14766, P51587,…	1280	412	18224	1.76241	0.0691589	0.00420681	0.159618
GOTERM_MF_DIRECT	GO:0000978~RNA polymerase II core promoter proximal region sequence-specific DNA binding	47	3.43316	0.000107058	P42224, Q8N5A5, O94916, Q6NUN9, Q15596, O15409, Q12772, P61371, F8VXC8, Q9BQA5, O75030, Q9UBG7, P48380, P36956, P50222, Q92922, Q9Y2X9, P01106, P52952, A0A087X0R0, Q9P2D1, Q14872, P10071, P26367, P10070, Q9HBZ2, P20226, Q96I24, Q9Y692, Q01664, Q13952, O15516, Q2KHR2, P03372, P04150, P19532, Q13485, Q16656, Q9NSC2, P20265, P22670, O15350, O14529, Q8WXI9, P53539, P32242, P32243	1235	355	16881	1.80968	0.098931	0.00494836	0.168426
GOTERM_MF_DIRECT	GO:0019905~syntaxin binding	17	1.24178	0.000117014	P63027, O00161, O15400, Q9UL45, Q8N3L3, Q5T447, Q6P1M3, Q86SS6, O43752, A0A087WXL6, O75396, O95477, Q5T5C0, A0A087X0B7, Q99747, Q9UNK0, Q8TDW5	1235	77	16881	3.01779	0.107618	0.00516213	0.184074
GOTERM_BP_DIRECT	GO:0045665~negative regulation of neuron differentiation	14	1.02264	0.000130536	Q86YT6, P26196, Q96A47, P26367, P10071, Q8TE12, P61371, O43524, Q9NRA8, Q96SN8, O15350, O15116, Q155Q3, Q13127	1207	56	16792	3.47804	0.383642	0.028065	0.240317
GOTERM_MF_DIRECT	GO:0003684~damaged DNA binding	15	1.09569	0.000145207	P27694, Q16531, Q09472, O60934, Q92793, Q9UBZ9, P39748, Q9Y253, P54727, Q13620, Q92466, Q9H3D4, P29372, O15350, K4DI93, Q96SD1	1235	63	16881	3.25448	0.131769	0.00612452	0.228379
GOTERM_CC_DIRECT	GO:0005874~microtubule	41	2.99489	0.000149333	J3KQA9, P46940, Q86VH2, Q9UPN3, Q08AD1, G3V140, Q9UIF3, P78318, Q9NX95, Q969Q1, Q5T5Y3, Q9NS87, Q96SN8, Q9P2D7, Q5T7B8, Q9UJC3, Q86XR8, A0A5E8, Q07866, A0A075B6F3, O95235, Q5SW79, Q96CW5, Q1MSJ5, Q6EMB2, Q9UFH2, Q5JR59, O95239, Q96JB5, Q96N16, Q8NI77, O75449, Q8IVM0, Q96Q89, Q9ULW0, Q14679, H7BYN4, Q96L93, O00139, Q9H6D7, Q96AQ6, E9PGC8	1280	311	18224	1.87697	0.0956225	0.00556824	0.223783
GOTERM_BP_DIRECT	GO:0033962~cytoplasmic mRNA processing body assembly	7	0.511322	0.000149805	Q99700, Q96F86, P26196, Q5TC82, Q86TB9, Q9UGP4, P62310	1207	13	16792	7.49117	0.42614	0.0303827	0.275746
GOTERM_MF_DIRECT	'GO:0003730~mRNA 3''-UTR binding'	13	0.949598	0.000161083	Q6XE24, Q8NE35, Q9H0Z9, Q9H6E5, Q9Y6M1, Q5TC82, Q93073, Q17RY0, Q8TB72, Q14671, Q9BX46, O43390, O00425	1235	49	16881	3.62642	0.145079	0.00650981	0.253317
GOTERM_MF_DIRECT	GO:0001104~RNA polymerase II transcription cofactor activity	11	0.803506	0.000184074	Q96PK6, Q9UHV7, Q9UBK2, Q9NPJ6, Q96PN7, Q96RN5, Q86YW9, Q9NWA0, P52952, O60244, Q93074	1235	36	16881	4.17659	0.163995	0.00713921	0.289424
GOTERM_BP_DIRECT	GO:0007049~cell cycle	32	2.33747	0.000184131	P57059, Q9H0Z9, P30279, Q9ULG6, Q9Y3P9, Q96RW7, Q9NVA2, P49916, Q8TEW0, Q8N9N5, Q9Y5T5, A6NEM2, Q08999, H3BU04, Q96HI0, H3BRF9, J3KNL2, Q15019, Q5TZA2, O94804, Q14209, Q13620, Q13535, Q13625, Q9H3D4, Q96PU4, Q9P0W2, Q15007, O60583, K4DI93, Q13111, Q155Q3, Q8IX12	1207	217	16792	2.05157	0.494717	0.0352905	0.338828
GOTERM_MF_DIRECT	GO:0004843~thiol-dependent ubiquitin-specific protease activity	17	1.24178	0.0001875	Q8N5J2, Q13107, Q6GQQ9, Q96FW1, Q70EL2, Q70CQ2, Q86UV5, P40818, Q70CQ1, O95630, Q8NBR6, Q9Y4E8, Q96K76, Q9Y5T5, Q8NFA0, Q86T82, Q8TE49	1235	80	16881	2.90463	0.166778	0.00699293	0.294804
GOTERM_BP_DIRECT	GO:0017148~negative regulation of translation	14	1.02264	0.000190573	Q12906, Q9Y6M1, Q8NE35, Q00577, Q14444, Q9UPU9, Q92574, Q6Y7W6, A5YKK6, Q9NRA8, P31483, P07814, Q92879, O00425	1207	58	16792	3.35811	0.506643	0.0347094	0.350662
GOTERM_CC_DIRECT	GO:0005730~nucleolus	89	6.5011	0.000195904	Q12906, Q01082, Q14573, P42224, Q9H0A0, Q9H0D6, Q9C0J8, Q9Y3Y2, P29692, P51449, Q14146, P38432, Q9BQA5, Q4VX54, Q9Y4E1, Q15233, Q96PK6, O75691, Q6PJT7, Q04724, Q01780, O43390, Q1ED39, Q96EU6, Q9P2D1, Q13895, Q5T7V8, D6RJ07, Q9H6E5, P26196, Q8N4C6, Q96ST3, Q9NSI6, Q8TDD1, O60287, Q96JB5, Q15019, O14893, P17844, Q8WV24, P39748, Q9BSC4, O43148, Q15911, O14503, O43143, Q8N573, Q9NU22, O00159, P98082,…	1280	857	18224	1.47857	0.123533	0.00691579	0.293477
UP_KEYWORDS	Protein transport	65	4.74799	0.000198277	X6RLX0, Q9Y2D4, Q9C0E2, Q9UMZ2, Q15286, Q3ZCQ8, Q15027, O14787, O14617, Q9Y4E1, D6REX3, O60494, Q9NRA8, Q9NV70, O75694, Q15036, Q9UJC3, Q99747, Q7Z3B4, Q8WUH2, P42566, O00629, O00161, O14910, Q9H5N1, Q96T51, Q9P2N4, Q96JB2, O60749, Q9Y5W8, O43933, Q9P2E9, Q5EBL4, Q53GS7, O00159, P98082, E7ESC6, Q8WYP5, Q9NS69, Q8IWJ2, Q8TAG9, Q9UIA9, Q5T5C0, O75886, P52292, Q7Z6B0, P53992, Q6UWE0, O75381, Q9UGP8,…	1369	610	20581	1.60194	0.0828252	0.00233395	0.27966
GOTERM_BP_DIRECT	GO:0007067~mitotic nuclear division	35	2.55661	0.000206105	Q9NR09, Q13042, P55040, Q8NG31, A8MVW5, Q9C099, O60566, Q96PY6, Q9NRM7, Q9NS87, P60006, Q86U86, O75935, Q9Y5T5, Q86T82, Q14980, O14578, O00401, H3BU04, O14777, Q15019, O75449, P48729, Q8WVK7, Q6P1K2, Q96Q89, Q9ULW0, Q2NKX8, O95271, P04150, O60216, Q9UPV0, Q8TD19, Q15555, Q9H6D7	1207	248	16792	1.96341	0.534252	0.0357322	0.37919
UP_KEYWORDS	Nucleotide-binding	157	11.4682	0.000232862	P51531, Q9H0A0, Q9NWZ5, Q8IUG5, Q9NWZ3, O75962, B2RTY4, Q14289, Q86WJ1, Q15286, P36406, Q9BWT3, P49916, Q7L0Q8, Q96PY6, O43318, A0A0A0MT16, O00408, Q9P2D7, Q38SD2, Q96Q15, Q9P2D1, P15056, O00160, P26196, P51828, O43520, Q9NUQ8, Q92878, Q99973, Q8TDD1, P17844, A0A0D9SFM0, Q2NKX8, Q2TB90, Q14679, Q2M1P5, P33402, Q8IVH4, Q96L93, O43283, Q9NXL9, Q8TD19, Q9NU22, A0A087WYN9, Q86UK0, Q96L91, O00159, Q99…	1369	1788	20581	1.32006	0.0965547	0.00266853	0.328367
GOTERM_MF_DIRECT	GO:0030331~estrogen receptor binding	11	0.803506	0.000235879	Q9UBK2, Q9Y2J8, A5YKK6, Q14686, P35637, Q8TDD1, P17844, P61371, Q6P9F0, F6M2K4, Q92841, Q15788	1235	37	16881	4.06371	0.205098	0.00846533	0.370736
GOTERM_MF_DIRECT	GO:0030374~ligand-dependent nuclear receptor transcription coactivator activity	13	0.949598	0.000241925	Q9UBK2, Q9NPJ6, Q15596, Q6P9F0, F6M2K4, Q15788, O60244, Q93074, Q96PK6, Q9UHV7, Q96PN7, Q14686, Q15532, Q8IX12	1235	51	16881	3.48421	0.209763	0.00837268	0.380223
GOTERM_MF_DIRECT	GO:0001077~transcriptional activator activity, RNA polymerase II core promoter proximal region sequence-specific binding	34	2.48356	0.00024202	O94916, P61371, Q8IZQ8, O75030, P36956, P50222, P51692, Q96RI1, P48436, P01106, P52952, Q14872, P10071, P26367, P10070, Q9HBZ2, P15336, Q96I24, Q9Y692, Q01664, O60281, Q13952, O43474, P03372, P04150, P19532, Q9H3D4, Q13485, Q16656, P20265, O15350, P53539, P32242, P32243	1235	236	16881	1.96924	0.209836	0.00808829	0.380372
GOTERM_BP_DIRECT	GO:0071044~histone mRNA catabolic process	7	0.511322	0.000246248	Q13315, Q6PIY7, Q9H6E5, Q5TAX3, Q01780, Q8IU60, O15116	1207	14	16792	6.95609	0.598663	0.0406486	0.452887
GOTERM_CC_DIRECT	GO:0048471~perinuclear region of cytoplasm	68	4.96713	0.000284634	Q5SY18, P42224, Q9HAU5, Q14289, O75052, Q12830, P08133, D6REX3, O75146, Q9H7C4, O00408, Q96SN8, Q9Y3A3, Q13137, Q9H4E7, Q9H0E2, P08476, Q96S99, Q99569, P05556, Q5T447, Q9NWT6, Q15019, Q9H2G2, Q14677, Q6ZMB5, Q8IWX8, Q92574, Q13625, Q9UHY1, P09525, Q9BV73, P35637, P10909, Q8IX12, Q9UNK0, O60583, P49593, Q9UIQ6, Q9C0C7, Q8WVF2, O15400, A0A0B4J1S7, O15234, Q9UMX0, Q92805, O60566, Q96H72, O95477, Q96…	1280	621	18224	1.55902	0.174351	0.00953356	0.426135
GOTERM_CC_DIRECT	GO:0031965~nuclear membrane	32	2.33747	0.000326728	Q9NVV0, Q9UPN4, P30279, Q9NXF1, Q9NQ66, O14787, Q9UPP1, O75052, Q8IU68, O75694, Q96T37, Q7Z3B4, Q86UW9, Q5SW79, Q9BVL2, F5GXQ8, P46060, Q15154, Q86UE4, H7C3U5, P52948, A0A087WW73, Q7Z403, Q8TB72, O95271, Q9H2F5, Q9Y5Q9, P20700, P09525, Q15007, Q8WYP5, Q8NHQ1, Q8N201	1280	229	18224	1.98952	0.19742	0.0104179	0.489011
GOTERM_CC_DIRECT	GO:0016020~membrane	195	14.244	0.000346121	Q8NF50, Q9H0A0, O75694, Q15075, Q8TEQ6, Q8WUH2, P26196, Q969V3, Q969V5, Q5T4S7, Q96JB5, J3QSU6, P46937, Q96JB2, P46939, Q8IWX8, P04233, Q9P2E9, O43283, O60216, Q99570, Q02818, Q04609, Q9NS69, Q8IWJ2, Q14444, Q13591, O75376, Q11130, G5E9W2, P52569, Q86UP2, P10644, O95754, Q15311, Q9BQG0, Q6P2Q9, O75381, Q8NE71, O75976, P10070, O95239, Q9NP74, A0A0A0MT60, Q9NY93, P07814, Q14573, Q86WG5, O43246, Q9B…	1280	2200	18224	1.26196	0.20783	0.0105341	0.517966
GOTERM_BP_DIRECT	GO:0048511~rhythmic process	13	0.949598	0.000362967	P41229, P43699, P57059, Q96ST3, P17844, Q92793, P78527, Q6UUV9, Q9UGL1, Q8TC92, Q92753, J3KQC0, Q03060, P23511	1207	54	16792	3.34923	0.739659	0.0568325	0.666872
GOTERM_CC_DIRECT	GO:0016607~nuclear speck	29	2.11833	0.000389694	A0A0G2JPI4, O15234, Q9NQ66, Q9Y3Y2, Q3ZCQ8, Q15233, Q9NRA8, Q6PJT7, Q8TF01, P50222, Q86Z02, Q9Y6X2, Q96T37, P49750, Q6P2Q9, Q92585, Q9H6E5, P10071, Q9ULJ6, P10070, Q9P2N5, P48729, A0A087WW73, Q86TB9, Q15007, Q96L91, Q8WXI9, O75925, Q96CJ1, Q9P0U4	1280	201	18224	2.05417	0.230731	0.0113402	0.582995
UP_KEYWORDS	mRNA processing	40	2.92184	0.000396979	Q9H0Z9, Q9UPN6, Q9UK59, Q9H0D6, Q969L4, O15234, Q9C0J8, Q5T481, Q9BWT3, Q15233, O43290, Q9UHX1, Q92945, O43390, O75934, Q6P2Q9, Q8TEQ6, Q9H6E5, Q5BKZ1, Q5SZQ8, Q8WUQ7, O14893, P17844, A0A1B0GUN8, O95639, Q96BP3, O43251, P52756, Q6PIY7, O43148, B0QYV1, Q7KZ85, Q70CQ1, O43143, Q15007, Q92879, Q9NW13, Q5VTL8, O15116, Q15459, P62310	1369	332	20581	1.81128	0.158961	0.00442906	0.559191
GOTERM_CC_DIRECT	GO:0016605~PML body	18	1.31483	0.000438544	P06400, P27694, Q9UBK2, P46100, Q9H2X6, Q13472, O60934, Q9H254, Q4VX54, Q9H422, Q9NRA8, Q13535, O75427, E9PCK9, Q86TB9, Q86Z02, P42345, O75925	1280	98	18224	2.61505	0.255621	0.0122249	0.655853
UP_KEYWORDS	Nonsense-mediated mRNA decay	9	0.657414	0.000454473	Q9NPJ4, E9PD50, Q9HAU5, O15234, Q01780, Q92540, Q9UPR3, Q8IU60, Q96Q15, Q8IZD4	1369	29	20581	4.6656	0.17979	0.00494263	0.639937
UP_KEYWORDS	Intermediate filament	15	1.09569	0.000495872	K7EMP8, Q8N1A0, Q0D2I5, F8W9J4, Q2M2I5, P41219, Q03252, Q6A163, Q9H7C4, P20700, Q13515, P14136, P13646, P17661, Q5XKE5, Q7Z3Y9	1369	77	20581	2.92862	0.194469	0.00526059	0.69804
UP_KEYWORDS	SH3 domain	29	2.11833	0.000498779	Q92608, Q9UPN3, O75962, O76041, Q15811, Q9UDY2, F8W9J4, Q8IWW6, Q8N2Y8, Q96KQ4, O75886, Q8TEC5, P54284, Q07157, P20936, O00160, Q9BX66, P19878, Q13813, E7ERW7, Q6XZF7, O60229, Q13625, Q8TDM6, A6NNM3, Q14847, Q8TF17, O95153, Q9P2A4, P02549	1369	215	20581	2.02779	0.19549	0.00516571	0.70212
GOTERM_BP_DIRECT	GO:0006355~regulation of transcription, DNA-templated	142	10.3725	0.00050943	Q96BD5, P51531, Q7Z589, Q96A47, Q9ULV5, Q9Y3Y2, P29692, F5H0I3, Q12830, Q96AE4, A0A087WW39, P12524, A6NEM2, Q15714, B0QYS6, Q8WUH2, O00401, Q9P2D1, A0A0C4DFM2, Q8TDD1, O60902, P55198, Q13952, Q9H4Z2, O15516, Q2KHR2, Q15911, O14503, J9JID5, A3KN83, Q9H2Z4, Q9P0W2, P08235, Q8TAK6, Q96ME7, Q14789, J3KQC0, Q8IX12, Q8WYP5, A0A140T9R5, Q6NUN9, Q15596, B0ZBF6, Q92793, Q9Y250, Q9UIF8, Q9H422, Q86UP3, P46…	1207	1504	16792	1.31352	0.848768	0.0756882	0.934773
GOTERM_BP_DIRECT	GO:1901796~regulation of signal transduction by p53 class mediator	21	1.53397	0.000520349	P27694, Q09472, Q92878, Q8N0Z6, Q9H2X6, P20226, Q13472, O60934, Q9ULW0, Q13315, Q92630, O00268, Q13535, Q13625, Q99638, Q9H3D4, Q96KQ4, Q86Z02, Q8N9N5, O15164, O15350	1207	124	16792	2.35609	0.85477	0.0742745	0.954718
UP_KEYWORDS	Albinism	7	0.511322	0.000557947	P17643, Q92902, Q9UL45, Q969F9, Q96EV8, O75030, Q04671	1369	17	20581	6.19031	0.215989	0.00564292	0.785104
GOTERM_BP_DIRECT	GO:0007099~centriole replication	7	0.511322	0.000579534	O43379, Q9P209, Q96SN8, Q8N137, Q2KHM9, O94986, Q6UVJ0	1207	16	16792	6.08658	0.883394	0.0793286	1.06276
GOTERM_BP_DIRECT	GO:0007018~microtubule-based movement	16	1.16874	0.000580234	A0A075B6F3, Q86VH2, O95235, Q9UFH2, O95239, Q8NI77, Q96Q89, Q86UP2, Q2M1P5, H7BYN4, Q9NS87, Q96L93, Q5T7B8, O00139, P04629, Q07866	1207	81	16792	2.74808	0.883696	0.0765947	1.06404
GOTERM_MF_DIRECT	GO:0005524~ATP binding	143	10.4456	0.000592594	P51531, Q9H0A0, Q9NWZ5, Q8IUG5, Q9NWZ3, O75962, Q86WJ1, B2RTY4, Q14289, Q9BWT3, P49916, Q96PY6, O43318, A0A0A0MT16, Q9P2D7, Q38SD2, Q96Q15, Q9P2D1, P15056, O00160, P26196, P51828, O43520, Q9NUQ8, Q92878, Q99973, Q8TDD1, P17844, A0A0D9SFM0, Q2NKX8, Q2TB90, Q14679, Q2M1P5, P22413, Q96L93, O43283, Q9NXL9, Q8TD19, Q9NU22, A0A087WYN9, Q86UK0, Q96L91, O00159, Q99570, P34932, O14920, H0Y493, P49336, Q9Y…	1235	1495	16881	1.30745	0.438287	0.0190419	0.92895
UP_KEYWORDS	Motor protein	21	1.53397	0.000603999	A0A075B6F3, Q86VH2, O00160, O95235, Q8IUG5, Q9UFH2, O95239, B2RTY4, Q8NI77, Q96Q89, Q2M1P5, H7BYN4, Q9NS87, Q96L93, Q9P2D7, H3BV44, Q5T7B8, O00139, O00159, P35749, Q96H55, Q07866	1369	135	20581	2.33856	0.231583	0.005969	0.849649
GOTERM_BP_DIRECT	GO:0033235~positive regulation of protein sumoylation	6	0.438276	0.000606849	P27540, Q969V5, P56524, Q9Y6X2, Q9H0E2, O75925	1207	11	16792	7.58846	0.89463	0.0772223	1.11259
GOTERM_BP_DIRECT	GO:0032922~circadian regulation of gene expression	13	0.949598	0.000612956	Q9UBK2, Q15596, P08138, P51449, P35680, P35398, A0A1W2PQJ7, O15516, O14503, Q15911, Q99743, Q9BQG0, J3KQC0, A0A0C4DG53, Q03060	1207	57	16792	3.17295	0.896989	0.0753839	1.12372
GOTERM_MF_DIRECT	GO:0003723~RNA binding	62	4.52885	0.000630956	Q8N1W1, Q12906, Q96CM3, Q9UPN6, Q8NE18, Q9HAU5, P52594, Q5T481, Q3ZCQ8, Q9Y5A9, Q8IU60, Q9BWT3, Q96PK6, Q96AE4, P31483, Q14671, O43390, Q8IUH3, Q9UBK2, Q9H6E5, Q00577, Q96ST3, Q8TDD1, Q99973, Q5SZQ8, P41214, A0A1B0GUN8, Q7Z739, Q8IWX8, Q99729, O43148, A0A087WY31, P35637, Q92879, Q15459, P62310, Q8NE35, Q86Y13, O75179, O15234, Q14444, Q92841, Q92945, Q6P2Q9, P78332, O00425, Q99700, Q6XE24, P26639,…	1235	547	16881	1.5493	0.45888	0.0196152	0.988806
GOTERM_CC_DIRECT	GO:0030496~midbody	21	1.53397	0.000656495	P46940, O95235, Q9NR09, Q9Y5B0, Q99569, Q8NDL9, O95239, P55040, H3BRF9, J3KNL2, Q15019, A8MVW5, O75449, Q96R06, Q96Q89, P40818, H7BYN4, O14530, Q68DK2, O75935, Q9Y4B5	1280	129	18224	2.31773	0.357229	0.0175233	0.980308
UP_KEYWORDS	TPR repeat	24	1.7531	0.00070433	Q13042, P78527, O60293, Q92540, P42345, O43765, Q9H0C1, A0A087X0R0, Q07866, Q9C0D5, Q96HA7, O94826, Q9UFH2, P19878, Q8N0Z6, Q9Y6X3, Q96NG3, Q2NKX8, Q14154, Q8IYW2, E9PD50, Q9Y5Q9, Q9Y6J0, Q8TF17, Q8NHQ1	1369	167	20581	2.16052	0.264494	0.00680333	0.990134
UP_KEYWORDS	Centromere	21	1.53397	0.000730817	Q8NDV3, Q9Y6D9, O75177, Q96EA4, O14777, Q8NG31, P46060, Q15019, P48729, Q8WVK7, Q6P1K2, Q96R06, O60566, Q4VX54, Q2NKX8, O95271, O60216, Q9NVF7, O75935, Q8WYP5, Q8IWS0	1369	137	20581	2.30442	0.272945	0.00690545	1.02719
GOTERM_BP_DIRECT	GO:0006281~DNA repair	32	2.33747	0.000747298	Q16531, Q7Z589, Q86WJ1, O60934, P49916, P43351, Q9BQA5, F6M2K4, Q9Y253, Q13315, Q96PK6, Q52LR7, Q15233, Q92466, Q14686, Q9UGP5, Q96Q15, P42345, P27694, Q07864, Q92878, P46100, Q8N0Z6, Q9UBZ9, Q96FW1, A0A0D9SFM0, Q6P4R8, P39748, Q70EL2, Q13535, Q99638, Q9UPV0, Q13111	1207	235	16792	1.89442	0.937417	0.0882374	1.36841
GOTERM_BP_DIRECT	GO:0000086~G2/M transition of mitotic cell cycle	22	1.60701	0.000762983	Q9UPN4, A0A087WTU9, Q99996, Q9NQ66, O75330, Q8TAP6, Q15154, Q7Z7A1, Q8WV24, Q9ULW0, O94986, A0A087WW73, Q96SN8, Q9P209, Q9BV73, A8K8P3, Q8TCU4, Q9UPV0, A8MST6, Q86XR8, O75935, Q9H6D7, Q8NHQ1, O14578	1207	137	16792	2.23407	0.940955	0.0872314	1.39694
UP_KEYWORDS	Kinetochore	17	1.24178	0.000794041	Q9Y6D9, O75177, Q96EA4, O14777, Q8NG31, P46060, Q15019, P48729, Q8WVK7, Q6P1K2, Q96R06, O60566, Q2NKX8, Q9NVF7, O75935, Q8WYP5, Q8IWS0	1369	99	20581	2.58153	0.292728	0.00734184	1.11559
GOTERM_BP_DIRECT	GO:0006886~intracellular protein transport	32	2.33747	0.000802661	O15400, Q9NS69, Q9Y3P9, Q9UMZ2, Q9UIA9, P08138, Q9Y6Y8, O14787, O14617, O75886, Q15036, Q99747, P53992, Q8WUH2, Q8TDW5, Q07866, Q8IV36, Q96CN4, P41214, Q96JB2, Q9Y2I9, Q9UPU7, O60749, Q9Y5W8, O43752, O60763, P04233, O43147, A0A087WXL6, O15397, Q9H2T7, E7ESC6, Q9UNK0	1207	236	16792	1.8864	0.949037	0.0888252	1.46908
GOTERM_CC_DIRECT	GO:0045111~intermediate filament cytoskeleton	12	0.876552	0.000812382	K7EMP8, P51531, Q92817, F8W9J4, Q2M2I5, Q9UHH9, Q86SQ0, Q15149, E9PD50, Q9NU22, P13646, P14136, Q92540, P17661	1280	52	18224	3.28558	0.421291	0.020817	1.21176
GOTERM_MF_DIRECT	GO:0001046~core promoter sequence-specific DNA binding	11	0.803506	0.000868982	Q92786, Q8IZQ8, P35398, O15516, P03372, Q15911, Q16656, P48436, J3KQC0, A0A0C4DG53, Q13127, Q03060, P23511	1235	43	16881	3.49668	0.570824	0.0260877	1.35945
GOTERM_CC_DIRECT	GO:0071564~npBAF complex	6	0.438276	0.000881388	P51531, Q8WUB8, Q92922, Q15532, F8VXC8, O14497	1280	12	18224	7.11875	0.447574	0.0217393	1.31406
GOTERM_CC_DIRECT	GO:0031201~SNARE complex	12	0.876552	0.000961137	O00161, P63027, O43752, O75396, O15400, Q9UL45, Q5T5C0, P23763, Q99747, A0A087X0B7, Q9UNK0, Q12981	1280	53	18224	3.22358	0.476467	0.0228477	1.43216
UP_KEYWORDS	Actin capping	7	0.511322	0.00109026	Q01082, P47756, O15020, Q9H254, P11277, P02549, Q13813	1369	19	20581	5.5387	0.378496	0.00985967	1.5288
GOTERM_MF_DIRECT	GO:0042826~histone deacetylase binding	18	1.31483	0.00110609	P10071, O75376, Q92830, Q9UPR3, Q6KC79, Q8IZQ8, Q01664, O43474, Q9H7L9, Q99638, Q9UQL6, Q02086, P56524, Q6BDS2, Q9UKV0, P52292, Q14103, Q8IWS0	1235	102	16881	2.41215	0.659322	0.0321042	1.72736
GOTERM_BP_DIRECT	GO:0071108~protein K48-linked deubiquitination	8	0.584368	0.00113131	Q70CQ2, P40818, Q8N5J2, Q8NBR6, Q6GQQ9, Q96FW1, Q86T82, Q8TE49	1207	24	16792	4.63739	0.984946	0.119403	2.06468
GOTERM_CC_DIRECT	GO:0001725~stress fiber	12	0.876552	0.00113169	Q15746, Q8N3V7, P06753, P49023, O76041, Q9BX66, Q9NVA2, P67936, O00159, Q15942, A0A5E8, Q9Y613	1280	54	18224	3.16389	0.533296	0.0259357	1.68429
UP_KEYWORDS	Helicase	21	1.53397	0.00125798	Q8IVL1, P51531, P26196, Q9HCK8, P46100, Q86WJ1, Q8TDD1, P17844, A0A0D9SFM0, Q96C10, Q92841, Q2NKX8, Q14147, Q9NY93, Q9NXL9, O43143, Q8N3C0, A0A087WYN9, Q96L91, Q3L8U1, Q9P2D1	1369	143	20581	2.20773	0.422371	0.011138	1.76204
GOTERM_BP_DIRECT	GO:0030900~forebrain development	11	0.803506	0.00132327	P46531, W0Z7M9, Q9UBK2, P43699, P98164, P46100, P24468, Q13976, O14497, Q9BYW2, P32243	1207	46	16792	3.32683	0.992617	0.134433	2.41099
GOTERM_CC_DIRECT	GO:0014731~spectrin-associated cytoskeleton	5	0.36523	0.00134403	Q01082, Q12955, P11171, P11277, P02549	1280	8	18224	8.89844	0.595514	0.0297206	1.99734
GOTERM_CC_DIRECT	GO:0000242~pericentriolar material	7	0.511322	0.0014464	Q96PY6, O95271, Q6P2H3, Q96SN8, Q8N4C6, Q15154, O94986, C9J066	1280	19	18224	5.24539	0.622481	0.0309351	2.14795
UP_KEYWORDS	Primary microcephaly	7	0.511322	0.00147063	O43379, Q96SN8, Q8NG31, P78364, O94986, Q6UVJ0, Q9H4Z2	1369	20	20581	5.26176	0.473586	0.0127514	2.05704
GOTERM_BP_DIRECT	GO:0051693~actin filament capping	6	0.438276	0.00149719	Q01082, O15020, Q9H254, P11277, P02549, Q13813	1207	13	16792	6.42101	0.996129	0.146742	2.72376
UP_KEYWORDS	mRNA transport	17	1.24178	0.00167398	Q9Y6M1, Q9BVL2, P52594, O15234, Q9UIA9, Q9Y3Y2, P52948, O95271, Q7KZ85, O75694, Q9H2T7, Q92945, Q53GS7, O00159, Q7Z3B4, E7ESC6, O00425, Q8WYP5	1369	106	20581	2.41105	0.518315	0.0142208	2.33835
GOTERM_CC_DIRECT	GO:0072686~mitotic spindle	10	0.73046	0.00181391	H7BYN4, Q99569, Q9Y6D9, Q8NDL9, P55040, P46060, Q92830, Q96R06, Q14980, Q9Y6K9	1280	41	18224	3.47256	0.705322	0.0374637	2.6868
GOTERM_MF_DIRECT	GO:0003777~microtubule motor activity	15	1.09569	0.00183065	A0A075B6F3, Q86VH2, O95235, Q9UFH2, O95239, Q8NI77, Q96Q89, Q2M1P5, H7BYN4, Q96L93, Q9NS87, Q9P2D7, Q5T7B8, O00139, Q07866	1235	80	16881	2.5629	0.831843	0.0510858	2.84371
UP_KEYWORDS	Ubl conjugation pathway	66	4.82104	0.00201131	Q16531, Q9NR09, Q13042, Q9HAU4, P36406, Q9UPN9, Q969Q1, Q9P2G9, Q92466, Q9Y6X2, Q14139, Q8TEC5, Q9Y4E8, Q9NVF7, Q9Y5T5, Q86T82, G3V1Q5, Q96ME1, Q5T447, Q969V5, Q5T4S7, Q13107, Q96FW1, A0A0D9SFM0, Q70EL2, Q70EL4, P40818, Q70CQ2, P54727, Q70CQ1, Q92630, Q13620, Q96PU4, O15164, Q8NFA0, Q9BZV1, Q9P0J7, K4DI93, O95155, O75925, Q7L5Y6, Q8N5J2, A0A0G2JPI4, Q86Y13, Q969W9, Q9Y385, O95376, Q6UWE0, Q9BYM8,…	1369	680	20581	1.45914	0.584309	0.0167393	2.80336
GOTERM_MF_DIRECT	GO:0004402~histone acetyltransferase activity	11	0.803506	0.0021245	Q52LR7, Q09472, Q9H2F5, O94864, Q92830, Q15596, P15336, P51587, Q92793, Q15788, O15516	1235	48	16881	3.13244	0.87373	0.05741	3.29305
UP_KEYWORDS	Disease mutation	205	14.9744	0.0022503	G5E9C8, Q8NF50, Q6UVJ0, P16389, P13646, Q969F9, O75694, Q16821, P52952, P17661, P98160, Q9P2D1, O43379, P20936, P98164, Q00577, J3QSU6, Q8WVV4, Q9H4Z2, P22413, Q03252, Q8IVH4, O60216, P14410, Q8TF17, Q9NYJ8, C9J066, P41229, Q92902, O60934, Q9UDY2, Q92793, P42658, P10644, Q13315, P46531, Q86Y56, Q6P2Q9, P43699, Q99996, P26367, P10071, P10070, P19878, Q13976, Q13326, A0A087WXL6, O95630, Q9P219, P51…	1369	2550	20581	1.20858	0.625528	0.0183621	3.13158
GOTERM_BP_DIRECT	GO:0007411~axon guidance	23	1.68006	0.00226744	G5E9C8, P43699, Q01082, Q99985, P10071, P07333, P26367, P10070, Q8TE12, P08138, O15020, P18433, Q9H254, P11277, Q13813, O95754, Q9UI08, Q12955, Q13485, P04629, A0A075B6E5, P02549, P32243	1207	159	16792	2.01245	0.999778	0.208439	4.09755
UP_KEYWORDS	mRNA splicing	31	2.26443	0.00229399	Q9H0Z9, Q9UPN6, Q969L4, O15234, Q5T481, Q15233, O43290, Q9UHX1, O43390, Q92945, O75934, Q6P2Q9, Q8TEQ6, Q5BKZ1, Q5SZQ8, Q8WUQ7, O14893, P17844, Q96BP3, O43251, P52756, B0QYV1, Q7KZ85, Q70CQ1, O43143, Q15007, Q5VTL8, Q9NW13, Q92879, O15116, Q15459, P62310	1369	260	20581	1.79247	0.632609	0.0183723	3.19146
GOTERM_MF_DIRECT	GO:0008013~beta-catenin binding	15	1.09569	0.00232909	Q9UBN4, Q9HCS4, Q9HCK8, Q09472, Q86YW9, P10071, P35398, Q93074, O43524, O43474, P03372, P49023, Q9NSC2, P48436, Q8TDM6, A0A0C4DG53	1235	82	16881	2.50039	0.896569	0.0610787	3.60476
GOTERM_BP_DIRECT	GO:0016070~RNA metabolic process	5	0.36523	0.00248841	Q99700, B0QYV1, Q9H0D6, O15234, Q8TDD1, O43251	1207	9	16792	7.72899	0.999903	0.220905	4.48826
GOTERM_MF_DIRECT	GO:0005200~structural constituent of cytoskeleton	18	1.31483	0.00256477	K7EMP8, Q01082, Q9H4G0, Q96CW5, Q9Y490, O14777, O00468, K7EKI8, O15020, Q9H254, P11171, Q9Y4G6, P11277, Q13813, Q12955, Q13515, P14136, P17661, P02549	1235	110	16881	2.23672	0.917811	0.0653033	3.96266
GOTERM_MF_DIRECT	GO:0046966~thyroid hormone receptor binding	8	0.584368	0.00265566	Q9UHV7, Q9NPJ6, Q15652, Q14686, P35637, O75376, A0A5E8, F6M2K4, Q93074	1235	27	16881	4.05002	0.924784	0.065823	4.10035
UP_KEYWORDS	Cilium	26	1.8992	0.00278617	Q9UL16, Q86VH2, Q96M29, Q4G0U5, Q8IY31, Q9UIF3, Q9NPE6, Q9H7X7, Q5T655, Q9P2D7, Q8TCU4, A0A087X298, Q86VV8, A0A075B6F3, A0A087WTU9, Q8IYY4, P10071, Q9UFH2, Q6EMB2, A0A087WX34, Q96MC2, Q14679, Q8IYW2, Q2M1P5, Q9BV73, O14830, Q5EBL4	1369	207	20581	1.88828	0.703725	0.0218748	3.86375
UP_KEYWORDS	Serine/threonine-protein kinase	42	3.06793	0.00285782	Q07002, P57059, Q9NWZ3, O75962, O14920, H0Y493, P49336, O60566, Q9H422, P78527, Q9NRM7, Q13315, Q96PY6, O43318, P33981, Q9NSY1, Q9BQI3, Q86Z02, H0Y4E8, Q38SD2, P42345, Q96Q15, O14578, P15056, O75460, Q9BWU1, O75385, Q9Y3S1, Q13233, Q9H2X6, Q9H2G2, P48729, Q13976, O94804, X6R456, Q92630, Q13535, O60229, Q15746, O43283, Q8TD19, Q9UL54, Q99570	1369	393	20581	1.60664	0.712862	0.0220356	3.96125
GOTERM_BP_DIRECT	GO:0030520~intracellular estrogen receptor signaling pathway	7	0.511322	0.00287836	Q96PK6, Q9Y2J8, P03372, B0QYV1, Q14686, Q8TDD1, F6M2K4, O14497, O43251	1207	21	16792	4.63739	0.999977	0.24512	5.17409
UP_KEYWORDS	Triplet repeat expansion	8	0.584368	0.00296527	Q99700, Q9H1B7, Q96RN5, Q01668, P20226, A0A140T9R5, A0A1W2PQJ7, Q96EK4	1369	30	20581	4.00896	0.726041	0.0224593	4.10731
GOTERM_CC_DIRECT	GO:0010494~cytoplasmic stress granule	9	0.657414	0.00296868	Q99700, Q8TB72, P26196, P31483, Q14671, Q14444, Q5TC82, Q92945, Q9BUT9	1280	36	18224	3.55937	0.864785	0.0588315	4.362
GOTERM_MF_DIRECT	GO:0046983~protein dimerization activity	22	1.60701	0.00300995	Q99583, Q92902, O75461, Q9BW11, Q75V66, Q15596, Q12772, Q15788, O75030, O15516, Q16559, Q13315, Q14209, Q68DE3, P36956, Q99743, P19532, P51692, P12524, Q8TAK6, P01106, B0QYS6	1235	150	16881	2.00476	0.946768	0.0724492	4.63532
GOTERM_CC_DIRECT	GO:0030529~intracellular ribonucleoprotein complex	20	1.46092	0.00305435	O14979, Q99700, P46940, Q12906, P57772, O15234, Q99973, Q96N16, D6RBZ0, P48729, P17844, Q93073, Q99729, Q96PK6, P07814, Q92630, Q9UHX1, O43390, B7Z4B8, Q92879, Q14103	1280	136	18224	2.09375	0.872383	0.058754	4.48521
GOTERM_CC_DIRECT	GO:0005871~kinesin complex	11	0.803506	0.00340333	Q86VH2, H7BYN4, O95235, Q96L93, Q5T7B8, O95239, Q8NI77, O00139, Q96Q89, Q2M1P5, Q07866	1280	53	18224	2.95495	0.899173	0.0634505	4.98555
UP_KEYWORDS	Translocation	14	1.02264	0.00351671	Q9NS69, Q9BVL2, Q9UIA9, Q3ZCQ8, P52948, O95271, Q9P2E9, O75694, Q9H2T7, Q53GS7, O00159, Q7Z3B4, E7ESC6, O75381, Q8WYP5	1369	84	20581	2.5056	0.784757	0.026135	4.85362
GOTERM_MF_DIRECT	GO:0008022~protein C-terminus binding	25	1.82615	0.00352944	Q99700, Q9H190, Q09472, P19878, Q6KC79, P46937, Q12772, P38432, F8W9J4, O00505, Q93074, P55196, Q14207, O43933, Q9BV73, Q9Y6X2, Q15036, Q8N960, P98082, O00159, P51587, P98160, O75925, E7EPN9, Q07157	1235	182	16881	1.87759	0.967942	0.0824108	5.41468
GOTERM_BP_DIRECT	GO:0034644~cellular response to UV	10	0.73046	0.0035414	Q13535, Q09472, Q9H3D4, P35354, Q96K76, P21246, Q92793, P01106, O15350, Q969H0	1207	44	16792	3.16186	0.999998	0.286243	6.32955
GOTERM_CC_DIRECT	GO:0008385~IkappaB kinase complex	5	0.36523	0.00359802	X6RLX0, O43318, O43283, O14920, Q9Y6K9	1280	10	18224	7.11875	0.911596	0.0651642	5.26361
GOTERM_MF_DIRECT	GO:0031625~ubiquitin protein ligase binding	35	2.55661	0.00366182	Q9C0C7, Q9Y2F9, A0A0B4J1S7, O15234, Q6NUN9, P08138, Q9UPR3, A6QL63, Q9Y385, Q9BX70, O00463, Q4VX54, P10644, P46379, Q9H0E2, Q9Y6K9, Q969H0, Q969K4, P06400, Q9UBK2, P26367, P12277, Q9Y6H5, Q969V5, P25963, P46060, P36941, Q96FW1, A0A0D9SFM0, Q8IVM0, A8K0Z3, Q13620, P10909, K4DI93, Q9UNK0, O75925	1235	287	16881	1.66693	0.97183	0.0833785	5.61232
GOTERM_BP_DIRECT	GO:0000281~mitotic cytokinesis	8	0.584368	0.00372096	P40818, P20936, H7BYN4, O95235, Q01082, Q12955, O95630, O95239	1207	29	16792	3.83784	0.999999	0.292122	6.64015
GOTERM_CC_DIRECT	GO:0030027~lamellipodium	22	1.60701	0.00407004	Q765P7, Q9Y5C1, O94827, Q5SY18, P05556, Q14289, Q15811, Q9UH65, O60749, Q92574, Q9UI08, Q15746, Q9UHY1, P47756, P49023, P16389, Q8IVE3, A0A087X165, Q7L576, A0MZ66, A0A075B6E5, Q9P2A4, O00401	1280	160	18224	1.95766	0.935734	0.0714971	5.93462
GOTERM_MF_DIRECT	GO:0000900~translation repressor activity, nucleic acid binding	5	0.36523	0.00417283	Q8NE35, Q00577, Q92879, Q9ULR5, Q17RY0	1235	10	16881	6.83441	0.9829	0.0923286	6.37165
GOTERM_MF_DIRECT	GO:0008140~cAMP response element binding protein binding	5	0.36523	0.00417283	Q6UUV9, P57059, P15336, J3KQC0, Q6UUV7, Q03060	1235	10	16881	6.83441	0.9829	0.0923286	6.37165
GOTERM_CC_DIRECT	GO:0035097~histone methyltransferase complex	7	0.511322	0.00422515	Q14686, Q8NEZ4, Q9UKV0, Q9UMN6, F6M2K4, A0A087X0R0, Q9P0U4, Q9H4Z2	1280	23	18224	4.33315	0.942129	0.0722455	6.15414
GOTERM_BP_DIRECT	GO:0006978~DNA damage response, signal transduction by p53 class mediator resulting in transcription of p21 class mediator	6	0.438276	0.00423908	Q9H0Z9, Q9H3D4, Q9H2X6, P51587, O15350, Q01664	1207	16	16792	5.21707	1	0.31893	7.53099
GOTERM_BP_DIRECT	GO:0010832~negative regulation of myotube differentiation	6	0.438276	0.00423908	P46531, Q7RTS1, Q9UQL6, P56524, P52952, Q8IZQ8	1207	16	16792	5.21707	1	0.31893	7.53099
UP_KEYWORDS	Homeobox	30	2.19138	0.00488118	Q96A47, Q9C0A1, P61371, O43365, Q9UMQ3, Q86UP3, Q99626, P50222, Q86Z02, P52952, Q5XKR4, P43699, Q92786, P26367, Q9H2X6, Q8TE12, Q9H4I2, P14859, P35680, P39880, O60902, Q8NFW5, P55347, Q15911, Q9H2Z4, Q6ZSZ6, P20265, O14529, P32242, P32243	1369	262	20581	1.7214	0.881567	0.0355135	6.67715
GOTERM_MF_DIRECT	GO:0051059~NF-kappaB binding	8	0.584368	0.00502331	Q13625, P09525, Q96BH1, Q9Y6X2, P25963, Q9NWT6, Q96JB5, Q86UE4	1235	30	16881	3.64502	0.992553	0.1077	7.62273
UP_KEYWORDS	Nuclear pore complex	10	0.73046	0.00519626	O95271, Q9BVL2, O75694, Q9UIA9, Q9H2T7, Q53GS7, O00159, Q7Z3B4, E7ESC6, Q8WYP5, P52948	1369	50	20581	3.00672	0.89684	0.0371503	7.09359
GOTERM_CC_DIRECT	GO:0005815~microtubule organizing center	21	1.53397	0.00520956	Q9UPN4, Q2M329, Q9NR09, Q96CW5, E7ERF0, Q9Y490, A0A075B749, Q1MSJ5, Q96EA4, Q8NI77, J3KNL2, O75449, O60566, O94986, Q6ZP82, Q9NRM7, Q96SN8, P04150, Q9BV73, O94830, Q9BZV1, Q5M775	1280	153	18224	1.95417	0.970258	0.0861907	7.53629
GOTERM_CC_DIRECT	GO:0030057~desmosome	7	0.511322	0.00530422	Q99569, Q14126, Q08554, K7EKI8, Q92817, Q8WVV4, Q99959	1280	24	18224	4.1526	0.972103	0.0855944	7.66819
GOTERM_MF_DIRECT	GO:0001102~RNA polymerase II activating transcription factor binding	9	0.657414	0.00541324	P06400, O14503, Q09472, Q96ST3, Q9H2X6, O75376, P15336, Q92793, P61371	1235	38	16881	3.23735	0.994915	0.113108	8.19108
GOTERM_BP_DIRECT	GO:0042771~intrinsic apoptotic signaling pathway in response to DNA damage by p53 class mediator	8	0.584368	0.00552883	Q92630, P46379, Q09472, Q9H3D4, Q9H2X6, Q86Z02, P51587, O15350	1207	31	16792	3.59024	1	0.386969	9.71371
GOTERM_BP_DIRECT	GO:1901216~positive regulation of neuron death	6	0.438276	0.00565474	Q13625, Q96KQ4, P10909, Q6NUN9, P42345, Q4VX54	1207	17	16792	4.91018	1	0.386684	9.92415
GOTERM_BP_DIRECT	GO:0060285~cilium-dependent cell motility	5	0.36523	0.00580195	A0A075B6F3, P48380, Q9P2D7, Q9UFH2, Q96MC2	1207	11	16792	6.32372	1	0.387519	10.1696
GOTERM_BP_DIRECT	GO:0006600~creatine metabolic process	5	0.36523	0.00580195	P17540, P12277, P51692, P06732, P42229	1207	11	16792	6.32372	1	0.387519	10.1696
GOTERM_BP_DIRECT	GO:0007016~cytoskeletal anchoring at plasma membrane	5	0.36523	0.00580195	Q9H4G0, Q12955, Q9Y490, Q9H254, Q9Y4G6	1207	11	16792	6.32372	1	0.387519	10.1696
GOTERM_CC_DIRECT	GO:0090544~BAF-type complex	4	0.292184	0.00587131	Q68CP9, Q86U86, F8VXC8, O14497	1280	6	18224	9.49167	0.980995	0.0921349	8.4547
GOTERM_MF_DIRECT	GO:0005158~insulin receptor binding	8	0.584368	0.0060868	P22413, P08069, Q9BX66, O14654, P35568, Q99704, O60496, O60749	1235	31	16881	3.52744	0.997369	0.12367	9.16513
GOTERM_BP_DIRECT	GO:0010830~regulation of myotube differentiation	4	0.292184	0.00626714	Q9H0Z9, P57059, Q9UQL6, Q9BX46	1207	6	16792	9.27479	1	0.404228	10.9412
GOTERM_MF_DIRECT	GO:0005484~SNAP receptor activity	9	0.657414	0.00638311	O00161, P63027, O43752, O75396, O15400, P23763, A0A087X0B7, Q9UNK0, Q12981	1235	39	16881	3.15434	0.998032	0.126677	9.59056
GOTERM_MF_DIRECT	GO:0004407~histone deacetylase activity	9	0.657414	0.00638311	Q96BD5, Q9H7L9, Q96ST3, Q9UQL6, Q9P0W2, P56524, Q9UKV0, Q9NSC2, Q13127	1235	39	16881	3.15434	0.998032	0.126677	9.59056
GOTERM_BP_DIRECT	GO:0007275~multicellular organism development	54	3.94449	0.00640053	Q9UPN4, X6RLX0, Q96J94, P52594, Q08117, O14905, A5YKK6, Q04724, Q9UJC3, Q8N9N5, Q9UGP4, Q9BY79, Q5VZL5, P15822, P31629, Q9P2N4, Q8WUQ7, Q2TAL8, P39880, Q9UJQ4, Q8NDX5, Q92576, Q9H2Z4, Q2VWP7, P98082, P78364, Q5VTY9, J3KQC0, A0A140T9R5, Q99583, P07332, P07333, Q96KR1, O43365, O75030, Q99626, P46531, O95376, Q96PN7, P50222, Q9UHN6, Q8IXK0, Q03060, P26367, P36941, Q96SI1, P35712, Q13535, Q9NRN5, Q16…	1207	521	16792	1.44195	1	0.403966	11.1612
GOTERM_MF_DIRECT	GO:0016817~hydrolase activity, acting on acid anhydrides	4	0.292184	0.00658866	Q9HCK8, Q3L8U1, Q96C10, Q9P2D1	1235	6	16881	9.11255	0.998391	0.1279	9.88459
GOTERM_MF_DIRECT	GO:0004674~protein serine/threonine kinase activity	42	3.06793	0.00661377	Q07002, P57059, Q9NWZ3, O75962, O14920, H0Y493, P49336, O60566, Q9H422, P78527, Q9NRM7, Q13315, Q96PY6, O43318, P33981, Q9NSY1, Q86Z02, H0Y4E8, Q38SD2, P42345, Q96Q15, O14578, P15056, O75460, Q9BWU1, O75385, Q9Y3S1, Q13233, Q9H2X6, Q9H2G2, P48729, Q13976, O94804, X6R456, Q92630, Q13535, O60229, Q9UHY1, O43283, Q8TD19, Q9UL54, O60583, Q99570	1235	376	16881	1.52684	0.99843	0.125858	9.92044
GOTERM_BP_DIRECT	GO:0007062~sister chromatid cohesion	16	1.16874	0.00665076	Q8NDV3, Q9Y6D9, Q8NG31, O14777, Q96EA4, Q8NI77, P46060, Q8WVK7, Q6P1K2, P52948, O60566, Q2NKX8, O60216, O00139, Q8WYP5, Q969H0	1207	103	16792	2.16112	1	0.409221	11.5727
GOTERM_MF_DIRECT	GO:0042802~identical protein binding	74	5.40541	0.00696947	Q9H190, P42224, Q9HAU4, P19623, P36406, P38432, Q15233, Q9P209, Q04724, Q9UJC3, Q9Y4E8, Q38SD2, P17661, A6NEM2, A0A087X0R0, P42566, P15056, P06400, K7EMP8, P08476, O75460, Q969V5, P25963, Q13107, J3KNL2, Q15154, Q9H2G2, O94804, Q86SS6, P08069, Q92734, P04233, Q13625, P09525, O43283, P35637, Q6BDS2, Q53GS7, Q15555, Q13111, Q8NHQ1, Q8IWJ2, G3V140, O15234, Q9BXD5, Q9Y6C2, P43351, Q9UMX0, O00463, Q96…	1235	749	16881	1.35046	0.998892	0.129666	10.4269
GOTERM_CC_DIRECT	GO:0000777~condensed chromosome kinetochore	14	1.02264	0.00746408	Q9Y6D9, O75177, Q8NG31, O14777, P46060, Q15019, P48729, Q96R06, O60566, Q2NKX8, Q9NVF7, O75935, Q8WYP5, Q8IWS0	1280	87	18224	2.29109	0.99354	0.113125	10.6305
GOTERM_MF_DIRECT	GO:0050681~androgen receptor binding	9	0.657414	0.00747909	P06400, Q9UBK2, Q09472, O43294, P17844, O75925, Q4VX54, Q15788, Q13772	1235	40	16881	3.07549	0.999327	0.13592	11.148
GOTERM_BP_DIRECT	GO:0006974~cellular response to DNA damage stimulus	26	1.8992	0.00780552	Q86WJ1, Q92537, P43351, F6M2K4, Q8TC71, Q13315, Q99743, Q14686, P01106, Q9Y5T5, Q9Y6K9, Q969H0, H3BU04, Q92878, Q6KC79, P15336, Q96FW1, P46937, A0A0D9SFM0, Q13535, Q92630, Q99638, Q9NXL9, Q9H3D4, Q96K76, O15350, Q9UL54	1207	208	16792	1.73902	1	0.454023	13.4483
GOTERM_BP_DIRECT	GO:0044255~cellular lipid metabolic process	9	0.657414	0.00785822	Q9P2D6, Q96ST3, Q6UXH0, Q14686, O75376, Q15596, Q92793, Q3L8U1, F6M2K4, Q15788	1207	41	16792	3.05389	1	0.449455	13.533
GOTERM_CC_DIRECT	GO:0031410~cytoplasmic vesicle	28	2.04529	0.00789456	Q96JI7, Q92902, P07332, P52594, Q9UMX0, Q9NX95, F8W9J4, Q13315, Q9Y2J4, Q8N2Y8, Q674R7, Q15036, Q15075, Q13137, P04629, O15240, Q07866, O00401, P63027, Q86YT6, Q07075, Q9NRR5, Q8WV24, A8K0Z3, O00159, Q9UL54, Q8TF17, Q9BQS8	1280	235	18224	1.69638	0.995176	0.116664	11.2101
GOTERM_BP_DIRECT	GO:0051297~centrosome organization	8	0.584368	0.00792449	P07332, Q96SN8, Q9Y2D8, Q15154, Q8N960, A8MVW5, Q9H6D7, Q5TZA2	1207	33	16792	3.37265	1	0.445596	13.6393
GOTERM_BP_DIRECT	GO:0001701~in utero embryonic development	24	1.7531	0.00797522	Q86YT6, Q9HCK8, P05556, P10071, Q9HBZ2, Q9ULJ6, P10070, Q96ST3, Q8IUG5, Q6UB99, Q2MV58, A0A087WX34, Q92830, P35590, O14905, O14672, P35712, Q9BQA5, Q9H4Z2, P46531, Q13485, P01106, A0A087X0R0, Q9P2D1	1207	187	16792	1.78552	1	0.441227	13.7207
GOTERM_BP_DIRECT	GO:0008380~RNA splicing	22	1.60701	0.0080081	Q9UBK2, Q9UPN6, Q9H0Z9, Q969L4, Q5BKZ1, Q5T481, Q5SZQ8, O14893, O43251, P52756, Q15233, B0QYV1, Q7KZ85, Q8TA86, Q9UHX1, O43143, Q92945, Q15007, O75934, Q5VTL8, Q6P2Q9, Q9NW13, O15116	1207	166	16792	1.84378	1	0.436272	13.7734
GOTERM_MF_DIRECT	GO:0016874~ligase activity	32	2.33747	0.00830515	Q9NR09, Q86Y13, Q9HAU4, A0A0G2JPI4, P36406, Q9UPN9, P49916, Q969Q1, Q6ZSG1, O95376, Q9Y6X2, Q14139, Q8TEC5, Q6UWE0, Q9BYM8, G3V1Q5, Q86UW9, Q86YT6, Q6EMB2, Q5T447, Q969V5, Q5T4S7, Q15751, Q7Z6Z7, A0A0D9SFM0, Q96PU4, Q96BH1, Q9H992, O15164, Q9P0J7, O75925, O95155	1235	270	16881	1.62001	0.999701	0.147098	12.3052
GOTERM_MF_DIRECT	GO:0002039~p53 binding	12	0.876552	0.00885991	D6RJ07, Q9HCK8, Q13625, Q09472, Q9H3D4, Q96KQ4, Q99973, O15164, Q8N9N5, Q92793, O15350, Q4VX54	1235	67	16881	2.44815	0.999826	0.153395	13.0744
GOTERM_CC_DIRECT	GO:0000790~nuclear chromatin	24	1.7531	0.00888711	P51531, P42224, Q9NQ66, O75376, Q92793, F8VXC8, P48380, O00268, Q92922, H3BU04, P26367, Q92878, Q92830, P20226, Q15788, A0A087WW73, O43474, P03372, Q9H3D4, Q13485, Q99967, Q8WXI9, O14497, Q7Z3K3, Q13111	1280	193	18224	1.77047	0.99754	0.127629	12.5334
GOTERM_MF_DIRECT	GO:0001228~transcriptional activator activity, RNA polymerase II transcription regulatory region sequence-specific binding	15	1.09569	0.00896998	Q09472, Q8TEY5, P15336, Q8IZQ8, P55347, O43524, Q9UMQ3, Q7RTS1, Q68CJ9, O60216, Q03933, Q13485, P52952, Q13127, Q96CJ1	1235	95	16881	2.15824	0.999844	0.152461	13.2262
GOTERM_BP_DIRECT	GO:0006396~RNA processing	15	1.09569	0.00926283	O14979, Q9H0D6, Q8TDD1, A0A1B0GUN8, Q8IWX8, O60293, Q92841, P52756, Q14147, A0A087WYN9, Q01780, Q14103, B7Z4B8, P78332, Q15459	1207	97	16792	2.15137	1	0.47842	15.7615
GOTERM_CC_DIRECT	GO:0030054~cell junction	47	3.43316	0.00935546	Q15811, P0CAP2, Q8IU60, P11171, Q17RY0, P55196, Q96SN8, Q92466, P23763, P16389, Q96CX2, Q99959, Q9C0D5, Q99569, O15020, Q9NWU2, P46939, P11230, Q86SS6, Q6XZF7, P0CAP1, Q96EV8, P17600, E9PE96, Q8NE35, Q86VH4, Q96RW7, Q9NVA2, O00468, Q9UDY2, Q9Y250, Q8TEW0, Q9C0C4, Q9P2M7, Q5T5C0, Q9UHX1, Q8TES7, O75934, Q9Y6V0, Q702N8, P20309, Q9UPA5, Q07157, P63027, Q6IQ23, Q9UPU9, E9PKC0, A0A087X165, O15350, A0A…	1280	459	18224	1.45787	0.998211	0.131141	13.1514
GOTERM_BP_DIRECT	GO:0008589~regulation of smoothened signaling pathway	6	0.438276	0.00942497	P10070, Q2MV58, A0A087WX34, Q92793, A0A0C4DG53, P35398, P32243	1207	19	16792	4.39332	1	0.477993	16.0153
UP_KEYWORDS	Translation regulation	15	1.09569	0.0096391	Q8NE35, Q9Y6M1, Q96J94, Q9UPQ9, Q8NDV7, O15234, Q9C0B0, Q9UPU9, Q8TB72, A5YKK6, A0A1B0GU24, P07814, Q14671, O00425, Q9ULR5	1369	105	20581	2.14766	0.985346	0.066888	12.7849
GOTERM_MF_DIRECT	GO:0005089~Rho guanyl-nucleotide exchange factor activity	13	0.949598	0.00971038	Q8N1W1, G5E9C8, O94827, Q5SY18, O75962, P10911, Q15811, Q9ULL1, O60229, Q6XZF7, O15068, Q07890, Q12802, Q8TER5	1235	77	16881	2.30772	0.999925	0.161232	14.2413
GOTERM_CC_DIRECT	GO:0016461~unconventional myosin complex	4	0.292184	0.00974113	O00160, H3BV44, Q8IUG5, B2RTY4, O00159	1280	7	18224	8.13571	0.998623	0.133433	13.6572
GOTERM_CC_DIRECT	GO:0014069~postsynaptic density	23	1.68006	0.00996568	G5E9C8, Q9C0D5, Q86YT6, O14910, Q01082, Q8NE35, Q99569, Q8N3V7, Q14289, O14672, Q9Y250, Q17RY0, Q9C0C4, Q15147, O14514, O75146, O60229, P40123, A0A087X165, Q96EV8, P17600, Q9Y6V0, E9PE96, Q9UPA5	1280	184	18224	1.77969	0.998818	0.133606	13.9505
UP_KEYWORDS	Guanine-nucleotide releasing factor	19	1.38787	0.010108	Q92608, G5E9C8, Q8N1W1, Q8NF50, Q92902, Q86WG5, O75962, Q8N9B8, P10911, Q15751, Q8TDF6, Q3MIN7, Q9ULL1, E7ERW7, O60229, Q9NRD0, O15068, Q12802, Q07890, Q8TER5	1369	149	20581	1.91704	0.98808	0.0689513	13.3662
GOTERM_BP_DIRECT	GO:0007221~positive regulation of transcription of Notch receptor target	4	0.292184	0.0103848	P46531, Q96T37, A0A140T9R5, Q92585	1207	7	16792	7.94982	1	0.505197	17.5026
GOTERM_CC_DIRECT	GO:0000145~exocyst	6	0.438276	0.0107752	Q9Y2D4, Q03169, Q9NV70, Q8TAG9, Q15019, A8K0Z3	1280	20	18224	4.27125	0.999318	0.140924	15
GOTERM_BP_DIRECT	GO:0035329~hippo signaling	7	0.511322	0.0108516	Q9NRM7, Q9Y2J4, Q9GZV5, Q8IX03, P46937, Q9UDY2, Q07157	1207	27	16792	3.60686	1	0.514349	18.2169
GOTERM_BP_DIRECT	GO:0034453~microtubule anchoring	5	0.36523	0.0111984	G3V140, Q8IWJ2, Q86XR8, Q15154, O75381	1207	13	16792	5.35084	1	0.519246	18.7438
GOTERM_BP_DIRECT	GO:0006511~ubiquitin-dependent protein catabolic process	23	1.68006	0.0113097	Q15011, Q8TCJ0, Q9HAU4, Q13107, Q9UPU5, Q70EL2, Q70EL4, Q70CQ2, Q86UV5, P40818, O95376, Q70CQ1, Q13620, P46379, Q9NRD0, Q9Y4E8, Q14139, Q96K76, Q8NFA0, Q9H0E2, Q9Y5T5, Q86T82, K4DI93, O95155	1207	182	16792	1.75813	1	0.516626	18.9121
GOTERM_CC_DIRECT	GO:0000118~histone deacetylase complex	8	0.584368	0.0114051	Q96BD5, Q96PN7, Q9UQL6, P56524, O75376, Q9UKV0, A0A1C7CYX1, Q9P2R6	1280	36	18224	3.16389	0.999556	0.145763	15.8083
GOTERM_BP_DIRECT	GO:0007010~cytoskeleton organization	21	1.53397	0.0115069	Q9UPN3, Q01082, Q5VZL5, Q9NSI6, O00468, K7EKI8, O15020, Q2TAL8, F8W9J4, P11277, Q7L0Q8, Q13813, Q6RI45, Q5T5Y3, P40123, P47756, P13646, P48436, Q9Y6V0, Q9UGP4, P17661, E9PE96	1207	161	16792	1.81463	1	0.516729	19.2097
GOTERM_BP_DIRECT	GO:0031175~neuron projection development	15	1.09569	0.0119992	P06400, Q9UL45, O75385, Q08AD1, Q14289, A0A024R216, Q15286, Q15751, Q15019, Q5T5Y3, W0Z7M9, Q13620, P47756, Q96EV8, Q9Y3E1, K4DI93, O95155	1207	100	16792	2.08683	1	0.52566	19.948
GOTERM_MF_DIRECT	GO:0036459~thiol-dependent ubiquitinyl hydrolase activity	12	0.876552	0.0122277	Q86UV5, Q70CQ2, P40818, Q70CQ1, Q13107, Q9Y4E8, Q9UPU5, Q8NFA0, Q70EL1, Q70EL2, Q86T82, Q70EL4	1235	70	16881	2.34323	0.999994	0.195595	17.6101
GOTERM_CC_DIRECT	GO:0005882~intermediate filament	16	1.16874	0.0125186	K7EMP8, Q8N1A0, Q0D2I5, F8W9J4, Q2M2I5, P41219, Q8NEH6, Q6A163, Q9H7C4, Q13515, P14136, P13646, Q5TF58, P17661, Q5XKE5, Q99959, Q7Z3Y9	1280	113	18224	2.01593	0.999792	0.155967	17.2196
GOTERM_BP_DIRECT	GO:0035023~regulation of Rho protein signal transduction	13	0.949598	0.0125786	Q8N1W1, G5E9C8, O94827, Q5SY18, O75962, P10911, Q15811, Q9ULL1, O60229, Q6XZF7, O15068, Q07890, Q12802, Q8TER5	1207	81	16792	2.23282	1	0.536643	20.8089
UP_KEYWORDS	Limb-girdle muscular dystrophy	7	0.511322	0.0127512	O14979, Q15149, Q13326, Q75V66, O15273, P17661, Q16586	1369	30	20581	3.50784	0.996285	0.0849842	16.5767
GOTERM_BP_DIRECT	GO:0043547~positive regulation of GTPase activity	56	4.09058	0.0128802	P46940, G5E9C8, Q8N1W1, Q5SY18, Q01082, Q8NF50, Q86WG5, B2RTY4, P52594, Q8N9B8, O75962, Q15811, Q15027, P18433, P35568, P55196, P20936, Q9H5N1, P05556, Q99569, Q6P1M3, O15020, P11277, Q9ULL1, Q13813, A0A087WW73, Q9Y5W8, O43147, Q6XZF7, O15068, Q9P2F8, Q07890, P02549, Q92608, Q92902, P10911, Q9NQ66, Q9UPP2, O00468, Q3MIN7, Q8IWW6, Q15311, Q5T5C0, H3BV44, Q9UJF2, Q9NRD0, O43157, P04629, Q99996, O94…	1207	565	16792	1.37891	1	0.53935	21.2536
UP_KEYWORDS	Thiol protease	19	1.38787	0.0130816	Q96HI0, Q8N5J2, Q13107, Q9UPU5, Q6GQQ9, Q96FW1, Q70EL2, Q70EL4, Q70CQ2, Q86UV5, P40818, Q70CQ1, Q8NBR6, Q9Y4E8, Q96K76, Q8NFA0, Q9Y5T5, Q86T82, Q8TE49	1369	153	20581	1.86692	0.996789	0.0858006	16.9701
GOTERM_BP_DIRECT	GO:0010628~positive regulation of gene expression	30	2.19138	0.013365	P80188, A0A0B4J1S7, O75052, Q9BQA5, O75030, Q96AE4, Q9UGL1, Q04724, Q9Y6X2, P01106, P42345, A6NEM2, A0A087X0R0, P15056, P08476, P43699, Q86VI3, Q5T6F2, P26367, J3QSU6, Q96I24, Q14157, O43474, Q12955, Q96EV8, O14529, Q99967, P06850, Q14103, P49593	1207	262	16792	1.593	1	0.546933	21.9633
GOTERM_CC_DIRECT	GO:0071565~nBAF complex	5	0.36523	0.0136821	P51531, O75177, Q92922, F8VXC8, O14497	1280	14	18224	5.08482	0.999906	0.166229	18.6708
GOTERM_CC_DIRECT	GO:0090498~extrinsic component of Golgi membrane	3	0.219138	0.014076	Q8IV36, Q02818, Q08378	1280	3	18224	14.2375	0.999928	0.167623	19.1567
GOTERM_MF_DIRECT	GO:0008139~nuclear localization sequence binding	7	0.511322	0.0140928	O00629, Q9BVL2, P25963, P52292, O14787, O00505, P52948	1235	28	16881	3.41721	0.999999	0.21855	20.0256
KEGG_PATHWAY	hsa04910:Insulin signaling pathway	17	1.24178	0.0142919	G5E9C8, Q9UBK2, P30613, Q9BX66, O14920, P49327, P35568, Q2TB90, P10644, Q92574, P52790, P36956, O14654, Q16821, Q07890, P42345, P15056	440	138	6879	1.92594	0.966534	0.171994	16.9153
GOTERM_BP_DIRECT	GO:0007492~endoderm development	6	0.438276	0.0146373	P46531, P43699, Q96L93, Q13485, Q12830, Q93074	1207	21	16792	3.97491	1	0.574327	23.7973
GOTERM_BP_DIRECT	GO:0021553~olfactory nerve development	3	0.219138	0.0147232	Q9NSC2, P04629, Q9P2D1	1207	3	16792	13.9122	1	0.570837	23.9197
GOTERM_BP_DIRECT	GO:0019218~regulation of steroid metabolic process	3	0.219138	0.0147232	P51692, P51449, A0A0C4DG53, P35398	1207	3	16792	13.9122	1	0.570837	23.9197
GOTERM_BP_DIRECT	GO:0034334~adherens junction maintenance	3	0.219138	0.0147232	P55196, Q8NHQ8, Q99959	1207	3	16792	13.9122	1	0.570837	23.9197
GOTERM_BP_DIRECT	GO:0048009~insulin-like growth factor receptor signaling pathway	5	0.36523	0.014801	A0A087WW73, Q6Y7W6, P08069, Q9NQ66, P35568, O75420	1207	14	16792	4.96864	1	0.567223	24.0303
GOTERM_BP_DIRECT	GO:0021549~cerebellum development	8	0.584368	0.014881	Q9UBK2, Q8TE12, O15409, A0A087WX34, P21246, Q14103, Q15788, Q9C0C4	1207	37	16792	3.00804	1	0.563745	24.1439
GOTERM_CC_DIRECT	GO:0042383~sarcolemma	13	0.949598	0.0152979	P12110, P05556, O43556, O75052, Q16586, P46939, Q13326, Q15149, Q9H7C4, Q12955, P12109, Q96EV8, P17661	1280	85	18224	2.1775	0.999969	0.177787	20.6468
GOTERM_BP_DIRECT	GO:0043928~exonucleolytic nuclear-transcribed mRNA catabolic process involved in deadenylation-dependent decay	7	0.511322	0.0154097	Q96F86, P26196, Q86TB9, Q8IU60, O15116, P62310, Q8IZD4	1207	29	16792	3.35811	1	0.571126	24.8907
UP_KEYWORDS	Host-virus interaction	38	2.77575	0.0154208	Q16531, Q9NWZ5, P42224, O75179, P36406, Q92793, Q4VX54, P22897, O00268, P52292, Q96T37, Q9BYM8, A6NEM2, O43765, Q9Y6K9, P02652, Q969H0, Q07866, P06400, Q9Y490, Q09472, P05556, Q92878, Q5T4S7, P25963, P20226, Q92830, P36941, Q15942, O95639, Q96C10, O00505, P52948, Q6UUV9, Q7KZ85, O15350, O60583, Q6UUV7	1369	385	20581	1.48384	0.998859	0.0989942	19.7066
GOTERM_BP_DIRECT	GO:0006260~DNA replication	20	1.46092	0.0154394	P27694, Q07864, H3BU04, Q92878, Q96ST3, Q13472, O60934, Q9UBZ9, P49916, F6M2K4, P52948, P39748, Q9Y253, Q96PK6, Q13315, Q13535, Q9NXL9, Q99638, Q14686, Q9UGP5, Q13111	1207	155	16792	1.79512	1	0.566535	24.9325
GOTERM_BP_DIRECT	GO:0016575~histone deacetylation	9	0.657414	0.0156423	Q96PK6, Q96BD5, Q9H7L9, Q96ST3, Q9UQL6, Q9P0W2, P56524, Q9UKV0, Q9NSC2	1207	46	16792	2.72195	1	0.566091	25.2172
GOTERM_BP_DIRECT	GO:1903076~regulation of protein localization to plasma membrane	4	0.292184	0.0157363	Q01082, O15400, O60229, Q9UNK0	1207	8	16792	6.95609	1	0.563142	25.3487
GOTERM_BP_DIRECT	GO:1900246~positive regulation of RIG-I signaling pathway	4	0.292184	0.0157363	Q8TB72, O75179, Q14671, Q96C10	1207	8	16792	6.95609	1	0.563142	25.3487
GOTERM_MF_DIRECT	GO:0051015~actin filament binding	18	1.31483	0.0158564	Q9UPN3, Q9UL45, Q9Y490, Q8TAM6, O76041, F5GXQ8, P46939, Q9Y4G6, P11277, O75146, P06753, P47756, Q7L576, P67936, A0MZ66, Q14847, P02549, P35749	1235	132	16881	1.86393	1	0.238785	22.2485
GOTERM_BP_DIRECT	GO:0051726~regulation of cell cycle	17	1.24178	0.0159808	P06400, Q99583, Q07002, Q9BWU1, Q08999, Q09472, P05556, Q9H2X6, Q9NQ66, P49336, A0A087WW73, Q13315, Q92574, Q14209, Q14671, Q96PU4, Q9Y5T5, A0A5E8	1207	124	16792	1.90731	1	0.563704	25.6897
UP_KEYWORDS	Kinase	65	4.74799	0.0160377	Q9NWZ5, P30613, Q9NWZ3, O75962, Q14289, P06732, Q9UHH9, Q96PY6, O43318, Q9BQI3, Q86Z02, Q38SD2, Q96Q15, O60496, P15056, O75460, Q9Y3S1, Q9H2G2, O94804, Q2TB90, P08069, Q92630, O43283, Q8TD19, Q9NYJ8, Q99570, Q07002, P17540, P57059, P07332, P07333, P21709, O14920, H0Y493, P49336, O60566, P78527, Q9H422, P10644, Q9NRM7, Q13315, Q6J9G0, P33981, Q9NSY1, H0Y4E8, P04629, P42345, Q9Y6K9, O14578, Q9BWU1,…	1369	735	20581	1.3295	0.999132	0.101299	20.4142
GOTERM_BP_DIRECT	GO:0060291~long-term synaptic potentiation	8	0.584368	0.0171422	K7EMP8, P63027, Q14573, Q14289, P14136, A0A087X0B7, P21246, P06850, P15056	1207	38	16792	2.92888	1	0.584405	27.2898
GOTERM_BP_DIRECT	GO:0030522~intracellular receptor signaling pathway	8	0.584368	0.0171422	P27540, Q96RI1, Q15596, Q92753, P24468, P51449, A0A0C4DG53, P35398, Q15788	1207	38	16792	2.92888	1	0.584405	27.2898
GOTERM_CC_DIRECT	GO:0016282~eukaryotic 43S preinitiation complex	5	0.36523	0.0176398	Q7L2H7, O15372, A0A087WYN9, Q99613, Q9Y262	1280	15	18224	4.74583	0.999994	0.198929	23.4312
GOTERM_CC_DIRECT	GO:0016514~SWI/SNF complex	5	0.36523	0.0176398	P06400, P51531, Q92922, F8VXC8, O14497	1280	15	18224	4.74583	0.999994	0.198929	23.4312
GOTERM_BP_DIRECT	GO:0007623~circadian rhythm	12	0.876552	0.0176743	Q15233, Q9UBK2, P36956, Q92786, Q99743, Q09472, P50416, O75376, O43390, P04629, P51449, O15516	1207	75	16792	2.22595	1	0.590699	28.0118
GOTERM_BP_DIRECT	GO:0051028~mRNA transport	9	0.657414	0.0177	O95271, Q9Y6M1, Q7KZ85, Q9UIA9, Q92945, Q9H2T7, O00159, E7ESC6, O00425, Q8WYP5	1207	47	16792	2.66403	1	0.586331	28.0466
GOTERM_BP_DIRECT	GO:0060271~cilium morphogenesis	18	1.31483	0.0177756	Q86VH2, Q8IYY4, Q4G0U5, Q8IY31, Q2MV58, Q9Y2D8, A0A087WX34, Q15019, Q9GZV5, Q15154, Q96PY6, P46531, P48380, Q5T7B8, Q5EBL4, Q9UPV0, Q8TES7, Q5TB80	1207	136	16792	1.84132	1	0.583065	28.1484
GOTERM_BP_DIRECT	GO:1900087~positive regulation of G1/S transition of mitotic cell cycle	6	0.438276	0.0178481	A0A087WW73, Q13620, P30279, O75179, Q969L4, Q9NQ66, Q7L2J0, K4DI93	1207	22	16792	3.79423	1	0.579797	28.2462
GOTERM_CC_DIRECT	GO:0005911~cell-cell junction	21	1.53397	0.0179396	P46940, O00161, Q9UBN4, O14910, O94827, Q5SY18, Q9H4G0, Q86VI3, Q9Y490, Q99569, Q9UHE8, A0A087WX34, Q16586, Q9Y4G6, Q8TEW0, P55196, O14514, P19397, Q14126, Q6UX39, Q9UGP4, Q99959	1280	172	18224	1.7383	0.999995	0.198691	23.7809
GOTERM_CC_DIRECT	GO:0030018~Z disc	16	1.16874	0.0180989	Q8N3V7, Q8IUG5, O76041, Q01668, P0CAP2, O75052, Q969Q1, F8W9J4, Q86TC9, Q9H7C4, Q12955, P47756, P56524, P0CAP1, Q8NBH2, O15273, P17661	1280	118	18224	1.93051	0.999995	0.197082	23.9662
GOTERM_BP_DIRECT	GO:0000077~DNA damage checkpoint	7	0.511322	0.0181226	Q13315, Q9NVH2, Q13535, Q99638, O60934, Q9BQA5, O15516	1207	30	16792	3.24618	1	0.580709	28.615
UP_KEYWORDS	Hermansky-Pudlak syndrome	4	0.292184	0.0181749	Q92902, Q9UL45, Q969F9, Q96EV8	1369	9	20581	6.6816	0.999664	0.112512	22.821
GOTERM_MF_DIRECT	GO:0042809~vitamin D receptor binding	5	0.36523	0.0202187	Q9UHV7, Q9NPJ6, Q14106, O60244, Q93074	1235	15	16881	4.55628	1	0.290122	27.501
GOTERM_MF_DIRECT	GO:0046965~retinoid X receptor binding	5	0.36523	0.0202187	Q71SY5, Q14686, P35637, Q96RI1, F6M2K4, Q15788	1235	15	16881	4.55628	1	0.290122	27.501
GOTERM_BP_DIRECT	GO:0016925~protein sumoylation	16	1.16874	0.0202951	P27694, Q96HI0, Q9BVL2, Q969V5, P46060, P43351, Q8NDX5, P52948, O75030, O60216, O75694, Q9Y6X2, Q7Z3B4, P78364, Q8IXK0, O75925	1207	117	16792	1.90252	1	0.61792	31.4706
GOTERM_MF_DIRECT	GO:0004386~helicase activity	13	0.949598	0.0204114	Q8IVL1, P51531, Q14147, P26196, Q9NXL9, P46100, Q96L91, Q3L8U1, A0A0D9SFM0, Q96C10, Q92841, Q2NKX8, Q9P2D1	1235	85	16881	2.09053	1	0.288299	27.7251
GOTERM_BP_DIRECT	GO:0006936~muscle contraction	15	1.09569	0.0208097	P17540, Q9Y490, Q9BX66, Q16586, Q6P5Q4, P46939, Q969Q1, P11230, Q15746, P06753, P49023, Q0VAK6, P67936, P17661, P35749	1207	107	16792	1.95031	1	0.622598	32.1309
GOTERM_MF_DIRECT	GO:0003774~motor activity	11	0.803506	0.0209107	Q9P2M7, Q0VF96, O00160, Q9NS87, H3BV44, Q8IUG5, B2RTY4, O00139, O00159, P35749, Q96H55, Q07866	1235	66	16881	2.27814	1	0.290147	28.303
GOTERM_BP_DIRECT	GO:0006607~NLS-bearing protein import into nucleus	6	0.438276	0.0214914	O00629, P52292, O14787, Q7Z3B4, O00505, Q9P2R6	1207	23	16792	3.62926	1	0.630012	32.9965
GOTERM_MF_DIRECT	GO:0000979~RNA polymerase II core promoter sequence-specific DNA binding	10	0.73046	0.0216591	Q14872, P42224, P26367, Q09472, Q03933, P51692, Q9NRM2, P20226, P46937, Q9H4Z2	1235	57	16881	2.39804	1	0.294802	29.161
GOTERM_CC_DIRECT	GO:0016459~myosin complex	9	0.657414	0.0221517	Q9P2M7, Q0VF96, O00160, H3BV44, Q8IUG5, B2RTY4, Q96LC9, O00159, P35749, Q96H55	1280	50	18224	2.56275	1	0.232399	28.5404
GOTERM_CC_DIRECT	GO:0005671~Ada2/Gcn5/Ada3 transcription activator complex	5	0.36523	0.0222405	O43318, Q92830, Q01658, Q14157, A6NEM2	1280	16	18224	4.44922	1	0.229703	28.6377
GOTERM_BP_DIRECT	GO:0007507~heart development	22	1.60701	0.022344	P10071, Q09472, P10070, Q5T481, Q96MC2, Q9BQ70, O60902, F6M2K4, P78527, Q93074, Q13315, P46531, Q14686, Q9NSC2, Q9UKV0, P21246, P52952, Q12802, Q702N8, Q99967, Q9NYJ8, Q99959, Q9H013	1207	183	16792	1.6725	1	0.63997	34.0644
GOTERM_BP_DIRECT	GO:0042921~glucocorticoid receptor signaling pathway	4	0.292184	0.0223603	Q96PK6, P04150, Q14686, F6M2K4, O14497	1207	9	16792	6.18319	1	0.635783	34.0847
GOTERM_BP_DIRECT	GO:0008360~regulation of cell shape	18	1.31483	0.0229908	P20936, P07332, P07333, Q8TAM6, Q13145, Q14289, Q9NSI6, P48729, Q9NP74, Q7L0Q8, Q6RI45, X6R456, Q7L576, O43157, P21246, Q9UGP4, Q9UL54, P02549	1207	140	16792	1.78871	1	0.641724	34.8638
GOTERM_MF_DIRECT	GO:0031593~polyubiquitin binding	6	0.438276	0.023022	P54727, Q9NRR5, P46379, Q86Y13, Q9UMX0, P42566	1235	23	16881	3.56578	1	0.306164	30.6989
GOTERM_MF_DIRECT	GO:0005198~structural molecule activity	28	2.04529	0.0234433	Q8N1A0, Q8IWC1, Q0D2I5, P11171, Q9NPE6, Q9Y4G6, Q2M2I5, Q9H7C4, P13646, Q5TF58, O75935, Q5XKE5, P17661, Q14980, K7EMP8, P02671, Q9H4G0, Q96CW5, Q9UBC9, H9KVB3, Q92817, Q5TZA2, P41219, Q6A163, Q03252, P20700, P14136, Q7Z3Y9, E9PGC8	1235	247	16881	1.5495	1	0.306761	31.168
GOTERM_BP_DIRECT	GO:0030518~intracellular steroid hormone receptor signaling pathway	5	0.36523	0.023997	Q9UHV7, Q9NPJ6, P03372, O60244, Q93074	1207	16	16792	4.34756	1	0.653305	36.0891
GOTERM_BP_DIRECT	GO:0033365~protein localization to organelle	5	0.36523	0.023997	P26367, Q9BV73, O14617, Q96JB2, Q5TZA2	1207	16	16792	4.34756	1	0.653305	36.0891
UP_KEYWORDS	Protein biosynthesis	18	1.31483	0.0243923	Q969K4, Q7L2H7, P57772, P26639, P29692, P41214, A0A087WUT6, Q9Y262, P26640, P07814, Q9NRA8, Q5JTZ9, Q9BQI3, O15372, P43897, A0A087WYN9, O75570, Q99613	1369	152	20581	1.78029	0.999979	0.146438	29.4438
GOTERM_BP_DIRECT	GO:0016579~protein deubiquitination	14	1.02264	0.0246543	P40818, Q86UV5, Q70CQ2, Q70CQ1, O95630, Q13107, Q9Y4E8, Q9UPU5, Q96FW1, Q8NFA0, Q70EL1, Q70EL2, Q86T82, Q70EL4	1207	99	16792	1.96738	1	0.659055	36.8778
GOTERM_BP_DIRECT	GO:0016032~viral process	32	2.33747	0.0249546	Q16531, Q9NWZ5, O75179, P36406, Q92793, Q4VX54, O00268, O75694, Q96T37, Q13137, Q9BYM8, Q7Z3B4, O43765, P02652, Q969H0, Q07866, P06400, Q9Y490, Q09472, Q92878, Q9BVL2, Q5T4S7, P25963, P20226, Q92830, P36941, Q15942, P52948, Q6UUV9, Q7KZ85, O15350, Q6UUV7	1207	299	16792	1.48893	1	0.659312	37.2351
GOTERM_BP_DIRECT	GO:0019827~stem cell population maintenance	9	0.657414	0.025028	O43474, Q5TAX3, P26196, Q9NRA8, Q6KC79, A0A087X169, O15116, O60244, Q93074	1207	50	16792	2.50419	1	0.656209	37.3221
GOTERM_MF_DIRECT	GO:0005085~guanyl-nucleotide exchange factor activity	16	1.16874	0.0250317	Q92608, G5E9C8, Q8N1W1, Q8NF50, O94827, Q5SY18, Q92902, Q9HCU5, O75962, Q8N9B8, P10911, Q15811, Q8TDF6, E7ERW7, O60229, O15068, Q12802, Q07890	1235	118	16881	1.8534	1	0.319825	32.9097
GOTERM_MF_DIRECT	GO:0001190~transcriptional activator activity, RNA polymerase II transcription factor binding	5	0.36523	0.0254332	O43474, P46531, Q96RI1, P52952, O15516	1235	16	16881	4.27151	1	0.319985	33.3434
GOTERM_CC_DIRECT	GO:0016235~aggresome	7	0.511322	0.0255004	Q8WVF2, O15016, Q9H0D6, Q9Y6J0, Q14146, Q9UMX0, P42566	1280	33	18224	3.02008	1	0.255208	32.1247
GOTERM_CC_DIRECT	GO:0016604~nuclear body	7	0.511322	0.0255004	Q15911, Q9H2X6, O75177, Q92793, Q9H0E2, Q86UE4, Q8TEQ6	1280	33	18224	3.02008	1	0.255208	32.1247
GOTERM_BP_DIRECT	GO:0030511~positive regulation of transforming growth factor beta receptor signaling pathway	6	0.438276	0.0255858	Q13485, Q9H2X6, O43294, P98082, Q99967, Q8IZQ8	1207	24	16792	3.47804	1	0.660256	37.9798
GOTERM_BP_DIRECT	GO:0042787~protein ubiquitination involved in ubiquitin-dependent protein catabolic process	19	1.38787	0.0262471	Q969K4, Q16531, Q96G75, Q9Y2F9, Q13042, Q86Y13, Q9HAU4, Q5T447, Q5T4S7, A6QL63, Q7Z6Z7, Q6ZSG1, Q9BX70, O60566, O95376, Q13620, Q9P2G9, P60006, K4DI93, O95155	1207	153	16792	1.72766	1	0.665638	38.751
GOTERM_MF_DIRECT	GO:0032266~phosphatidylinositol-3-phosphate binding	7	0.511322	0.0264535	Q96S99, Q9Y5W8, Q96L93, H3BRF9, Q68DK2, Q9Y4E1, Q8TEW0	1235	32	16881	2.99006	1	0.326482	34.4337
UP_KEYWORDS	Tumor suppressor	20	1.46092	0.0265204	P06400, P20936, Q08999, P57059, P07332, O60443, Q92537, Q9Y250, O60566, Q13315, Q92574, Q9NRM7, Q86U86, O15164, Q8N9N5, Q9UGP4, P98082, P51587, O75204, O15350	1369	177	20581	1.69871	0.999992	0.1562	31.5865
GOTERM_CC_DIRECT	GO:0044614~nuclear pore cytoplasmic filaments	3	0.219138	0.0268448	P46060, Q53GS7, P52948	1280	4	18224	10.6781	1	0.263042	33.5159
KEGG_PATHWAY	hsa04120:Ubiquitin mediated proteolysis	16	1.16874	0.0276901	Q16531, Q9NR09, Q13042, Q9HAU4, Q13233, Q15751, Q7Z6Z7, Q9Y385, Q13620, Q92466, Q9Y6X2, Q14139, K4DI93, O75925, Q969H0, O95155, Q7L5Y6	440	137	6879	1.82588	0.998676	0.241284	30.336
GOTERM_BP_DIRECT	GO:0034088~maintenance of mitotic sister chromatid cohesion	3	0.219138	0.0280474	P06400, Q6KC79, Q9Y6X3	1207	4	16792	10.4341	1	0.686161	40.8048
GOTERM_BP_DIRECT	GO:0031087~deadenylation-independent decapping of nuclear-transcribed mRNA	3	0.219138	0.0280474	Q9NPJ4, Q96F86, Q8IZD4	1207	4	16792	10.4341	1	0.686161	40.8048
GOTERM_BP_DIRECT	GO:2000741~positive regulation of mesenchymal stem cell differentiation	3	0.219138	0.0280474	P48436, P35711, F5H0I3, P35712	1207	4	16792	10.4341	1	0.686161	40.8048
GOTERM_CC_DIRECT	GO:0097431~mitotic spindle pole	4	0.292184	0.0284959	Q96SN8, Q8N4C6, Q96Q89, Q14980, C9J066	1280	10	18224	5695	1	0.273092	35.1881
GOTERM_CC_DIRECT	GO:0030864~cortical actin cytoskeleton	8	0.584368	0.028812	Q765P7, P40123, P0CAP1, Q6P1M3, Q8IVE3, P0CAP2, Q12802, P46939, Q14847	1280	43	18224	2.64884	1	0.271919	35.5038
GOTERM_MF_DIRECT	GO:0034056~estrogen response element binding	3	0.219138	0.0290049	P03372, O15405, O15164	1235	4	16881	10.2516	1	0.34783	37.0874
GOTERM_BP_DIRECT	GO:0000398~mRNA splicing, via spliceosome	25	1.82615	0.0292651	Q9BRD0, Q9UK59, O15234, Q5SZQ8, Q8WUQ7, P17844, Q96BP3, P52756, Q15233, Q9HCJ3, O43290, Q70CQ1, E9PAU2, O43143, P35637, Q96T37, O43390, O75934, B7Z4B8, Q14103, Q6P2Q9, Q8TEQ6, Q8IX12, Q15459, P62310	1207	222	16792	1.56669	1	0.697838	42.1569
GOTERM_BP_DIRECT	GO:0071310~cellular response to organic substance	5	0.36523	0.0296407	Q86VI3, C9JIZ6, P34810, P20265, O14529	1207	17	16792	4.09182	1	0.69861	42.568
GOTERM_BP_DIRECT	GO:0000375~RNA splicing, via transesterification reactions	6	0.438276	0.0301472	Q9UK59, Q92945, O75934, O14893, Q6P2Q9, O15116	1207	25	16792	3.33892	1	0.700961	43.118
GOTERM_BP_DIRECT	GO:0048709~oligodendrocyte differentiation	6	0.438276	0.0301472	Q9UBN4, P46531, P43699, P10071, P48436, Q8TAK6	1207	25	16792	3.33892	1	0.700961	43.118
GOTERM_BP_DIRECT	GO:0048589~developmental growth	6	0.438276	0.0301472	P10071, P10070, Q9ULJ6, Q13485, Q6KC79, Q8NFW5	1207	25	16792	3.33892	1	0.700961	43.118
GOTERM_BP_DIRECT	GO:0001578~microtubule bundle formation	6	0.438276	0.0301472	O95235, P07332, Q96SN8, Q9H7U1, Q9Y4B5, A0A5E8	1207	25	16792	3.33892	1	0.700961	43.118
GOTERM_BP_DIRECT	GO:0000290~deadenylation-dependent decapping of nuclear-transcribed mRNA	4	0.292184	0.0302664	Q86TB9, Q8IU60, O15116, Q8IZD4	1207	10	16792	5.56487	1	0.698585	43.2466
GOTERM_BP_DIRECT	GO:0034501~protein localization to kinetochore	4	0.292184	0.0302664	P33981, Q96EA4, Q8NG31, O60566	1207	10	16792	5.56487	1	0.698585	43.2466
GOTERM_CC_DIRECT	GO:0005794~Golgi apparatus	76	5.5515	0.031035	Q9UPN3, O43556, Q9UMZ2, Q8TEY5, A8MVW5, O14617, O60494, O43290, Q8IU68, O00408, Q96SN8, A0A087WSV8, Q15036, Q86XR8, Q9Y3A3, Q9NP58, Q9H013, Q5T7V8, P98164, H3BU04, O43520, F5GXQ8, Q14677, P39880, P80303, Q96JB2, P40818, Q7Z403, Q12955, O14503, Q9UQL6, P10909, P17600, Q14789, Q8NFA0, P14410, Q9UNP4, Q02818, Q9Y5C1, P07332, A0A0G2JPI4, Q8IWJ2, Q11130, Q92805, Q96H72, Q9BWQ6, Q08378, O95477, Q6P2H3,…	1280	863	18224	1.25382	1	0.285939	37.6833
GOTERM_MF_DIRECT	GO:0033558~protein deacetylase activity	4	0.292184	0.0316949	Q96ST3, Q9UQL6, P56524, Q9UKV0	1235	10	16881	5.46753	1	0.369259	39.7762
GOTERM_BP_DIRECT	GO:0007420~brain development	22	1.60701	0.0321288	P43699, Q9HCK8, P12277, Q92786, Q9HBZ2, Q9NQ66, Q96JB5, Q6KC79, Q9UPP1, Q12830, F6M2K4, P78527, Q9H4Z2, Q8NFW5, A0A087WW73, Q13315, Q15911, P46379, Q96SN8, Q14686, Q9HCL0, Q9NP58, P51587, P42345	1207	190	16792	1.61088	1	0.716631	45.2223
GOTERM_CC_DIRECT	GO:0034451~centriolar satellite	6	0.438276	0.0322866	Q9UPN4, Q9P209, Q9Y2D8, Q15154, Q96R06, Q2KHM9	1280	26	18224	3.28558	1	0.291861	38.8798
GOTERM_BP_DIRECT	GO:0042384~cilium assembly	16	1.16874	0.0323035	A0A087WTU9, Q86VH2, Q8IYY4, Q9C0D2, Q8IY31, Q9Y2D8, Q96M91, A0A087WX34, Q15154, Q15019, Q96PY6, P48380, Q8TCU4, Q5T7B8, Q9UPV0, Q8TES7, Q5TB80	1207	124	16792	1.79512	1	0.714897	45.4042
GOTERM_CC_DIRECT	GO:0005776~autophagosome	10	0.73046	0.0338654	Q9C0C7, A0A087WXL6, Q9NRR5, O75385, Q674R7, Q13137, Q9UMX0, A8K0Z3, Q99570, Q9BQS8	1280	64	18224	2.22461	1	0.300026	40.3588
UP_KEYWORDS	Synaptosome	9	0.657414	0.0338835	O00161, P63027, O14910, P16389, P23763, Q7L576, Q15811, Q9UPU9, Q9UPA5	1369	57	20581	2.37373	1	0.19322	38.5428
UP_KEYWORDS	Neurodegeneration	29	2.11833	0.0344094	Q71SY5, Q5SY18, Q96JI7, Q86WG5, Q9HCG7, P42658, Q69YN2, Q13315, Q6Y7W6, P23763, Q6UWE0, O94830, Q9Y6V0, Q92562, Q99700, O94827, O14773, Q9Y6H5, F5GXQ8, P20226, O15020, O14672, Q92734, O15040, P35637, Q9NZJ4, Q68DK2, Q9P219, Q8TF17, Q96HY7, E9PE96	1369	293	20581	1.48797	1	0.193478	39.0135
GOTERM_BP_DIRECT	GO:0002053~positive regulation of mesenchymal cell proliferation	6	0.438276	0.0351885	P42224, Q9H3D4, O15409, P48436, P01106, O60902	1207	26	16792	3.2105	1	0.742064	48.3275
GOTERM_CC_DIRECT	GO:0010008~endosome membrane	21	1.53397	0.0357273	P17643, Q96S99, Q8N5C8, Q9GZU1, Q9NWZ3, Q969W9, Q9UHE8, Q15286, O14617, O60749, Q04671, O43318, P22897, O60494, O60664, Q15036, Q96EV8, P34810, Q9NP58, Q9NYJ8, Q92562	1280	185	18224	1.61615	1	0.309941	42.06
GOTERM_MF_DIRECT	GO:0008565~protein transporter activity	11	0.803506	0.0359497	O00629, O60763, Q9NRA8, Q96T51, O15397, P52292, O14787, O14617, Q96JB2, O00505, O95149	1235	72	16881	2.08829	1	0.403264	43.8104
GOTERM_CC_DIRECT	GO:0014704~intercalated disc	8	0.584368	0.0359757	Q12955, P05556, P47756, Q14126, P17661, Q99959, Q9Y613, Q07157	1280	45	18224	2.53111	1	0.307902	42.2834
GOTERM_MF_DIRECT	GO:0005516~calmodulin binding	22	1.60701	0.0359912	P46940, P63027, O00160, Q01082, O60266, Q86VI3, Q08AD1, Q4G0U5, Q5T4S7, Q9UBL0, P55040, Q9NQ66, P17844, P11171, Q13813, A0A087WW73, Q5T5Y3, Q15746, Q96SN8, Q15075, O00159, P35749, Q07157	1235	189	16881	1.59108	1	0.399205	43.8484
GOTERM_BP_DIRECT	GO:0007043~cell-cell junction assembly	5	0.36523	0.0360028	Q9Y490, Q99569, Q96RI1, Q9Y4G6, Q07157	1207	18	16792	3.86449	1	0.746647	49.1254
GOTERM_BP_DIRECT	GO:0007219~Notch signaling pathway	15	1.09569	0.036023	Q86YT6, Q09472, O14672, P35680, Q92793, Q9Y264, P46531, P09525, Q9H3D4, Q96RI1, P48436, P01106, A0A140T9R5, Q86UW9, Q92585	1207	115	16792	1.81463	1	0.743344	49.1451
UP_KEYWORDS	Alternative promoter usage	12	0.876552	0.0360401	Q9UBK2, P51449, Q9UDY2, P46939, F8W9J4, P35398, P03372, Q9H3D4, Q96RI1, Q92753, O15350, J3KQC0, A0A0C4DG53, Q03060	1369	90	20581	2.00448	1	0.199303	40.4521
GOTERM_CC_DIRECT	GO:0005929~cilium	18	1.31483	0.0360713	Q9UL16, Q86VH2, O60266, P10071, Q6EMB2, Q4G0U5, Q8IY31, Q96M91, A0A087WX34, Q9Y2I9, Q9H7X7, Q2M1P5, Q14679, Q5T655, Q9BV73, Q5EBL4, A0A087X298, Q86WI1	1280	151	18224	1.69719	1	0.304829	42.3692
GOTERM_BP_DIRECT	GO:0000731~DNA synthesis involved in DNA repair	7	0.511322	0.036585	Q13315, Q07864, Q92878, Q13472, O60934, P51587, Q9Y253	1207	35	16792	2.78244	1	0.745373	49.6887
GOTERM_CC_DIRECT	GO:0031594~neuromuscular junction	9	0.657414	0.0370086	Q9H7C4, Q12955, P05556, P56524, P55291, P21246, P17661, P46939, P10644	1280	55	18224	2.32977	1	0.307756	43.2042
UP_KEYWORDS	Initiation factor	9	0.657414	0.037104	Q7L2H7, Q9NRA8, Q9BQI3, O15372, A0A087WYN9, P41214, Q99613, A0A087WUT6, Q9Y262	1369	58	20581	2.3328	1	0.202141	41.3736
UP_KEYWORDS	Cilium biogenesis/degradation	17	1.24178	0.0372344	Q9UPN4, Q86VH2, Q4G0U5, Q8IY31, Q2MV58, Q9Y2D8, Q15154, Q9UIF3, Q5TZA2, O94986, Q8IYW2, Q96PY6, Q5T7B8, Q9UPV0, Q86Y56, Q8TES7, Q5TB80	1369	148	20581	1.72683	1	0.200341	41.4856
UP_KEYWORDS	Ligase	33	2.41052	0.0385152	Q86Y13, A0A0G2JPI4, P36406, Q9UPN9, P30520, P49916, Q969Q1, Q6ZSG1, Q5JTZ9, Q9Y6X2, Q8TEC5, Q14139, Q6UWE0, Q9BYM8, G3V1Q5, Q86UW9, Q86YT6, Q6EMB2, Q5T447, Q969V5, Q5T4S7, P26639, A0A0D9SFM0, Q14679, P26640, P07814, Q96PU4, Q96BH1, Q9H992, O15164, Q9P0J7, O75925, O95155	1369	347	20581	1.42971	1	0.204136	42.5754
UP_KEYWORDS	Golgi apparatus	68	4.96713	0.0385439	X6RLX0, Q9UPN3, Q9NR09, O43556, Q9UMZ2, Q8TEY5, P36406, Q9HCG7, A8MVW5, O14617, Q12772, Q8IZ52, Q7L0Q8, P36956, Q96SN8, A0A087WSV8, Q9Y3A3, Q9NP58, Q9Y2C2, Q5T7V8, O43520, F5GXQ8, Q3V5L5, P80303, P39880, Q96JB2, Q8WWZ7, P04233, Q6XZF7, Q12955, P17600, Q8NFA0, Q14789, Q9UNP4, Q02818, P07332, Q7Z7M8, Q8IWJ2, Q8IY31, Q969W9, Q11130, G5E9W2, Q9NX95, Q92805, Q96H72, Q08378, Q7Z6B0, P53992, O94830, P42…	1369	812	20581	1.25897	1	0.201879	42.5997
GOTERM_BP_DIRECT	GO:0006888~ER to Golgi vesicle-mediated transport	19	1.38787	0.0386292	Q01082, Q9HCU5, Q15286, Q9Y6Y8, O15020, Q9H254, Q96JB2, P11277, Q13813, D6REX3, O60763, O75396, Q12955, Q9UHY1, P53992, O94830, O75935, Q14789, P02549	1207	160	16792	1.65207	1	0.761107	51.6203
GOTERM_CC_DIRECT	GO:0016363~nuclear matrix	13	0.949598	0.0387001	Q15233, Q9UPN6, A0A087WWT6, P20700, O95239, Q9BX66, Q5BKZ1, O43294, Q99973, Q9H254, Q8WYP5, Q14980, Q9P0U4	1280	97	18224	1.90812	1	0.315772	44.6825
GOTERM_BP_DIRECT	GO:0090051~negative regulation of cell migration involved in sprouting angiogenesis	4	0.292184	0.0394406	O43474, P46531, Q9UQL6, P50222	1207	11	16792	5.05897	1	0.765014	52.3674
GOTERM_BP_DIRECT	GO:0035195~gene silencing by miRNA	4	0.292184	0.0394406	A5YKK6, A0A1B0GU24, Q8NDV7, Q9UGP4	1207	11	16792	5.05897	1	0.765014	52.3674
GOTERM_BP_DIRECT	GO:0060213~positive regulation of nuclear-transcribed mRNA poly(A) tail shortening	4	0.292184	0.0394406	A5YKK6, Q8NE35, A0A1B0GU24, Q9UPQ9	1207	11	16792	5.05897	1	0.765014	52.3674
GOTERM_BP_DIRECT	GO:0006468~protein phosphorylation	44	3.21402	0.040029	Q12906, Q07002, P57059, Q9NR09, P07332, Q14289, O75962, O14920, H0Y493, P49336, O60566, Q9H422, Q9NRM7, Q13315, Q96PY6, Q9NSY1, Q86Z02, Q53R41, H0Y4E8, P04629, Q38SD2, P42345, O14578, Q92585, P15056, O75460, Q9BWU1, Q14CZ7, O75385, Q9Y3S1, Q13233, Q9H2X6, P48729, O14672, Q13976, O94804, Q92630, O60229, Q15746, Q9UHY1, O43283, Q8TD19, Q12802, O60583, Q99570	1207	456	16792	1.3424	1	0.766867	52.9023
GOTERM_CC_DIRECT	GO:0051233~spindle midzone	5	0.36523	0.0400889	Q99569, Q9Y5B0, P55040, Q96Q89, O60566	1280	19	18224	3.74671	1	0.321469	45.8693
GOTERM_BP_DIRECT	GO:0046777~protein autophosphorylation	20	1.46092	0.0402285	O75460, P57059, P07332, O75385, Q9Y3S1, P07333, P21709, Q14289, H0Y493, Q9H2G2, O94804, Q13315, P08069, P33981, Q13535, Q9BQI3, O43283, O15164, P04629, Q96Q15, P42345	1207	172	16792	1.6177	1	0.765339	53.0824
GOTERM_BP_DIRECT	GO:0072332~intrinsic apoptotic signaling pathway by p53 class mediator	6	0.438276	0.0407197	Q14209, D6RJ07, Q13625, Q96KQ4, Q9BQG0, P17844	1207	27	16792	3.0916	1	0.766329	53.5229
GOTERM_BP_DIRECT	GO:0043065~positive regulation of apoptotic process	31	2.26443	0.0408621	G5E9C8, Q5SY18, P10911, O75962, Q15811, P08138, P78527, Q9UHH9, Q13315, Q9NRM7, P46531, O75146, Q9H7L9, P21246, Q02127, D6RJ07, Q9BWU1, O94827, P05556, Q96LC9, P35354, Q01664, Q15788, O43524, P52756, O60229, O15068, P10909, Q07890, Q12802, O15350, Q13127	1207	300	16792	1.43759	1	0.764348	53.65
GOTERM_BP_DIRECT	GO:0010507~negative regulation of autophagy	7	0.511322	0.0413339	Q8N5C8, P51397, A0A0B4J1S7, Q15751, P42345, Q9NYJ8, A8K0Z3	1207	36	16792	2.70515	1	0.765172	54.0684
UP_KEYWORDS	Cardiomyopathy	11	0.803506	0.0417793	Q86TC9, Q5JTZ9, Q9Y2Z2, P43897, Q14126, Q5T481, O15273, P17661, Q99959, A0A0A0MQS9, P15056	1369	81	20581	2.0416	1	0.214671	45.2682
GOTERM_CC_DIRECT	GO:0031465~Cul4B-RING E3 ubiquitin ligase complex	3	0.219138	0.0426765	Q16531, Q13620, Q92466, K4DI93	1280	5	18224	8.5425	1	0.334801	48.0174
UP_KEYWORDS	Alternative initiation	13	0.949598	0.0431598	Q9Y6M1, Q15746, O60229, P04150, Q96EV8, P20265, Q96T37, P49916, Q99704, P39748, Q92841, Q8NBJ4, P52655	1369	104	20581	1.8792	1	0.218557	46.3713
GOTERM_BP_DIRECT	GO:0051591~response to cAMP	8	0.584368	0.0443817	P42224, P36956, P30613, Q14289, O15240, P53539, J3KQC0, Q03060, P15056	1207	46	16792	2.41951	1	0.786455	56.6865
GOTERM_BP_DIRECT	GO:1904354~negative regulation of telomere capping	3	0.219138	0.044539	Q13315, Q92878, O60934	1207	5	16792	8.34731	1	0.784634	56.8177
GOTERM_BP_DIRECT	GO:0061038~uterus morphogenesis	3	0.219138	0.044539	Q9UGL1, Q6KC79, O14905	1207	5	16792	8.34731	1	0.784634	56.8177
GOTERM_MF_DIRECT	GO:0070530~K63-linked polyubiquitin binding	5	0.36523	0.0455321	Q6GQQ9, Q6P2Q9, Q9NYJ8, Q9Y6K9, Q8TE49	1235	19	16881	3.59706	1	0.471987	51.9879
KEGG_PATHWAY	hsa04068:FoxO signaling pathway	15	1.09569	0.0459386	G5E9C8, Q08999, Q8TCJ0, Q09472, P30279, O14920, Q92793, P35568, O43524, Q13315, P08069, Q13485, O14654, Q07890, P15056	440	134	6879	1.75008	0.999985	0.30923	45.4137
GOTERM_MF_DIRECT	GO:0000980~RNA polymerase II distal enhancer sequence-specific DNA binding	10	0.73046	0.0459736	Q99626, Q15233, P15822, P50222, Q96RI1, Q92922, P15336, Q8WXI9, F8VXC8, Q93074	1235	65	16881	2.1029	1	0.470603	52.3364
UP_KEYWORDS	LIM domain	10	0.73046	0.04847	Q96A47, P49023, Q8TE12, O76041, O43294, E9PMT2, Q9UGP4, P61371, Q14847, Q15942	1369	72	20581	2.088	1	0.239824	50.425
GOTERM_CC_DIRECT	GO:0005938~cell cortex	15	1.09569	0.0496175	P02671, Q8TAM6, Q96RW7, Q14289, Q15019, F8W9J4, Q8TEW0, Q92574, Q9UHY1, Q13515, P49023, P53365, Q12802, Q14980, Q9P0K7	1280	123	18224	1.73628	1	0.374479	53.3931
GOTERM_BP_DIRECT	GO:0061014~positive regulation of mRNA catabolic process	4	0.292184	0.0498496	A5YKK6, Q5TC82, O43390, Q92945	1207	12	16792	4.63739	1	0.818722	61.0335
GOTERM_BP_DIRECT	GO:0048596~embryonic camera-type eye morphogenesis	4	0.292184	0.0498496	P26367, Q9H2X6, Q86Z02, Q99967	1207	12	16792	4.63739	1	0.818722	61.0335
GOTERM_BP_DIRECT	'GO:0061158~3''-UTR-mediated mRNA destabilization'	4	0.292184	0.0498496	Q8NE35, Q5TC82, Q92945, Q14103	1207	12	16792	4.63739	1	0.818722	61.0335
GOTERM_BP_DIRECT	GO:0030728~ovulation	4	0.292184	0.0498496	A0A087WTU9, Q8TCU4, P35354, P01106, Q9UMN6	1207	12	16792	4.63739	1	0.818722	61.0335
UP_KEYWORDS	Autophagy	15	1.09569	0.0503561	Q9C0C7, P51397, A0A087WXL6, O75385, Q9NRR5, O15040, A0A0B4J1S7, Q674R7, Q13137, Q2TAZ0, Q6UWE0, Q9H0E2, Q9UMX0, B0QYS6, Q12981	1369	130	20581	1.73465	1	0.245418	51.7949
UP_KEYWORDS	Charcot-Marie-Tooth disease	8	0.584368	0.0505762	Q96JI7, Q5SY18, O94827, Q71SY5, Q86WG5, Q6UWE0, Q8TF17, Q92562, Q96HY7	1369	51	20581	2.35821	1	0.243735	51.9524
GOTERM_BP_DIRECT	GO:0002052~positive regulation of neuroblast proliferation	5	0.36523	0.0509034	Q5XKR4, P46531, P10071, P26367, Q9H4Z2	1207	20	16792	3.47804	1	0.822575	61.8224
GOTERM_BP_DIRECT	GO:0030318~melanocyte differentiation	5	0.36523	0.0509034	P17643, Q9UL45, P10071, O75030, Q04671	1207	20	16792	3.47804	1	0.822575	61.8224
GOTERM_BP_DIRECT	GO:0051568~histone H3-K4 methylation	5	0.36523	0.0509034	Q8NEZ4, Q8WWB3, Q9UMN6, A0A087X0R0, Q9P0U4	1207	20	16792	3.47804	1	0.822575	61.8224
GOTERM_CC_DIRECT	GO:0045202~synapse	20	1.46092	0.0511477	X6RLX0, P63027, Q8NE35, Q96JI7, Q6ZSJ9, Q15811, O00468, Q15019, P11230, Q9Y4G6, Q9UPU9, Q17RY0, Q6UUV9, Q6XZF7, Q9Y6X2, A0A087X165, Q7L576, Q9Y6V0, A0A075B6E5, P20309, E9PE96	1280	181	18224	1.5732	1	0.379659	54.5062
GOTERM_BP_DIRECT	GO:0043524~negative regulation of neuron apoptotic process	16	1.16874	0.0515888	Q9C0C7, P20936, Q9UBK2, O15405, Q14289, Q9H2X6, Q15811, P61371, Q7Z6R9, Q17RY0, Q8TB73, O95630, Q8N573, P04629, O15350, P15056	1207	132	16792	1.68632	1	0.824058	62.3274
GOTERM_CC_DIRECT	GO:0031252~cell leading edge	7	0.511322	0.0527571	P46940, Q8NF50, Q9Y2D8, Q9H2G2, A0MZ66, F8W9J4, Q86SQ0	1280	39	18224	2.55545	1	0.385135	55.6502
GOTERM_MF_DIRECT	GO:0030674~protein binding, bridging	11	0.803506	0.0532068	Q96PK6, P02671, A0A087WXL6, Q12955, Q92878, Q92817, O15273, Q8IX03, P39880, Q9UDY2, Q969H0	1235	77	16881	1.95269	1	0.517486	57.7188
GOTERM_BP_DIRECT	GO:0045214~sarcomere organization	6	0.438276	0.0532763	Q86TC9, P05556, P52952, O15273, Q6P5Q4, P10644	1207	29	16792	2.87838	1	0.831407	63.5438
GOTERM_BP_DIRECT	GO:0006294~nucleotide-excision repair, preincision complex assembly	6	0.438276	0.0532763	P54727, P27694, Q16531, Q13620, Q92466, Q86WJ1, K4DI93	1207	29	16792	2.87838	1	0.831407	63.5438
GOTERM_BP_DIRECT	GO:0060412~ventricular septum morphogenesis	6	0.438276	0.0532763	P46531, Q92786, Q13485, Q96T37, P52952, Q99967	1207	29	16792	2.87838	1	0.831407	63.5438
GOTERM_MF_DIRECT	GO:0030506~ankyrin binding	5	0.36523	0.0537349	Q15149, Q01082, Q01668, Q9H254, P11277	1235	20	16881	3.41721	1	0.516272	58.0886
GOTERM_BP_DIRECT	GO:0000910~cytokinesis	8	0.584368	0.0540204	H7BYN4, O95235, Q15286, Q68DK2, O75935, P51587, Q8WYP5, O14578	1207	48	16792	2.3187	1	0.833062	64.0683
GOTERM_CC_DIRECT	GO:0005635~nuclear envelope	18	1.31483	0.0543419	Q8NE71, Q9BVL2, F5GXQ8, P46060, P0CAP2, P80303, Q9NPE6, F8W9J4, P52948, Q9Y217, Q8NEH6, P36956, P20700, P0CAP1, A0A087WSV8, O15397, E9PCK9, O75694, Q7Z3B4, Q12981	1280	159	18224	1.61179	1	0.390295	56.7503
GOTERM_BP_DIRECT	GO:0006406~mRNA export from nucleus	13	0.949598	0.0544391	Q9BRD0, Q9BVL2, Q9HAU5, O15234, P52594, Q9Y3Y2, Q9UPR3, P52948, E9PD50, O75694, Q53GS7, Q92540, Q7Z3B4, Q96Q15	1207	100	16792	1.80858	1	0.832848	64.3603
UP_KEYWORDS	SH3-binding	9	0.657414	0.0562679	P40818, P98164, Q9UI08, Q13625, O14672, A0A075B6E5, O14578, Q9H013, P42566	1369	63	20581	2.14766	1	0.265031	55.8642
GOTERM_CC_DIRECT	GO:0000776~kinetochore	11	0.803506	0.0565767	P33981, Q9Y6D9, Q96ST3, O75177, O14777, P46060, Q8NI77, Q9NVF7, Q96R06, P52948, O60566	1280	81	18224	1.93349	1	0.398925	58.2585
UP_KEYWORDS	Wnt signaling pathway	19	1.38787	0.0567973	Q9HCS4, Q9UPN3, Q9HCK8, A6NFA1, Q08117, P48729, O14905, Q70CQ2, O95271, Q969G9, Q04726, Q04727, Q9Y2J4, Q04724, O43294, Q9P219, P98082, Q9UP38, Q155Q3	1369	181	20581	1.57811	1	0.264471	56.2126
GOTERM_BP_DIRECT	GO:0007224~smoothened signaling pathway	10	0.73046	0.0576906	Q92630, P10071, P26367, P10070, Q96F81, Q8IY31, Q9H2X6, Q86Z02, Q15019, Q5VTY9	1207	69	16792	2.01626	1	0.847821	66.5527
GOTERM_BP_DIRECT	GO:0050890~cognition	7	0.511322	0.0578251	A7XYQ1, Q8TA86, Q7L576, Q96N16, Q6KC79, O14529, Q9P2D1	1207	39	16792	2.49706	1	0.846066	66.6406
GOTERM_BP_DIRECT	GO:0001756~somitogenesis	7	0.511322	0.0578251	Q13315, Q86YT6, Q99985, Q09472, Q92830, O15273, P78527	1207	39	16792	2.49706	1	0.846066	66.6406
GOTERM_CC_DIRECT	GO:0097440~apical dendrite	4	0.292184	0.0580596	Q9UBK2, Q8NE35, Q14289, P10909	1280	13	18224	4.38077	1	0.403145	59.232
GOTERM_BP_DIRECT	GO:0006293~nucleotide-excision repair, preincision complex stabilization	5	0.36523	0.0594366	P27694, Q16531, Q13620, Q92466, Q86WJ1, K4DI93	1207	21	16792	3.31242	1	0.851746	67.6767
GOTERM_BP_DIRECT	GO:0097150~neuronal stem cell population maintenance	5	0.36523	0.0594366	P46531, Q92786, Q15154, Q15532, O43524	1207	21	16792	3.31242	1	0.851746	67.6767
GOTERM_BP_DIRECT	GO:0000132~establishment of mitotic spindle orientation	5	0.36523	0.0594366	Q96SN8, P26367, O14777, Q96EA4, Q14980	1207	21	16792	3.31242	1	0.851746	67.6767
GOTERM_BP_DIRECT	GO:0035264~multicellular organism growth	11	0.803506	0.0598359	Q16559, G5E9C8, Q6Y7W6, Q02086, P46100, Q6UB99, Q92830, O15020, Q9GZV5, P42345, A0A087X0R0	1207	80	16792	1.91292	1	0.851333	67.9287
GOTERM_CC_DIRECT	GO:1990454~L-type voltage-gated calcium channel complex	3	0.219138	0.0610791	Q01668, O75052, P54284	1280	6	18224	7.11875	1	0.415443	61.149
GOTERM_CC_DIRECT	GO:0016012~sarcoglycan complex	3	0.219138	0.0610791	Q13326, O43556, Q16586	1280	6	18224	7.11875	1	0.415443	61.149
GOTERM_CC_DIRECT	GO:1990124~messenger ribonucleoprotein complex	3	0.219138	0.0610791	Q8NE35, O15116, Q17RY0	1280	6	18224	7.11875	1	0.415443	61.149
GOTERM_BP_DIRECT	GO:0036159~inner dynein arm assembly	4	0.292184	0.0614449	Q9P2D7, Q86Y56, A0A087X298, Q9UIF3	1207	13	16792	4.28067	1	0.856693	68.9253
GOTERM_BP_DIRECT	GO:0007009~plasma membrane organization	4	0.292184	0.0614449	Q765P7, Q01082, Q12955, P02549	1207	13	16792	4.28067	1	0.856693	68.9253
GOTERM_BP_DIRECT	GO:0016180~snRNA processing	4	0.292184	0.0614449	Q9NVH2, Q9H6E5, Q96HW7, Q8N201	1207	13	16792	4.28067	1	0.856693	68.9253
GOTERM_BP_DIRECT	GO:0071300~cellular response to retinoic acid	10	0.73046	0.0621837	O43474, O95477, Q14289, P13646, P48436, J3QSU6, Q92753, P46937, P01106, O14905	1207	70	16792	1.98745	1	0.857835	69.3731
GOTERM_MF_DIRECT	GO:0070412~R-SMAD binding	5	0.36523	0.0626812	P26367, Q13485, Q9UPN9, Q969W9, Q8IZQ8	1235	21	16881	3.25448	1	0.568198	63.9108
GOTERM_MF_DIRECT	GO:0031369~translation initiation factor binding	5	0.36523	0.0626812	Q7L2H7, Q9Y4P3, Q53GS7, Q92879, Q99613	1235	21	16881	3.25448	1	0.568198	63.9108
GOTERM_CC_DIRECT	GO:0031901~early endosome membrane	14	1.02264	0.0630417	Q96T51, O15400, Q969W9, Q6ZMB5, A8K0Z3, O60749, Q9Y4E1, Q9Y5W8, Q96L93, O75886, Q15075, P04629, Q92562, P42566	1280	116	18224	1.71832	1	0.421775	62.3496
GOTERM_BP_DIRECT	GO:0009299~mRNA transcription	3	0.219138	0.0636749	P29692, P17844, Q9H422	1207	6	16792	6.95609	1	0.862326	70.2583
GOTERM_BP_DIRECT	GO:0043124~negative regulation of I-kappaB kinase/NF-kappaB signaling	7	0.511322	0.0640817	P03372, P42224, Q04724, Q96RI1, Q6GQQ9, A0A0C4DG53, P35398, Q8TE49	1207	40	16792	2.43463	1	0.861913	70.4956
GOTERM_MF_DIRECT	GO:0008536~Ran GTPase binding	6	0.438276	0.0641398	Q9C0E2, O15397, Q9UIA9, P46060, Q9H2T7, O14787, E7ESC6	1235	30	16881	2.73377	1	0.572019	64.7849
GOTERM_MF_DIRECT	GO:0043021~ribonucleoprotein complex binding	6	0.438276	0.0641398	E9PD50, P57772, Q3ZCQ8, Q92540, Q9UPR3, Q93073, Q8IWS0	1235	30	16881	2.73377	1	0.572019	64.7849
GOTERM_MF_DIRECT	GO:0003724~RNA helicase activity	4	0.292184	0.0641626	P26196, O43143, P17844, Q92841	1235	13	16881	4.20579	1	0.567409	64.7984
GOTERM_MF_DIRECT	GO:0017137~Rab GTPase binding	16	1.16874	0.0649	X6RLX0, Q96CN4, O75385, Q9Y3P9, Q8IY31, Q6P1M3, P08138, Q9Y2I9, Q9UPU7, Q9BWQ6, O43147, Q5T5C0, Q96L93, Q8N2Y8, O75204, Q8TDW5	1235	134	16881	1.6321	1	0.567015	65.2326
GOTERM_BP_DIRECT	GO:0007179~transforming growth factor beta receptor signaling pathway	12	0.876552	0.0650564	Q9P2M7, O43318, P05556, Q13145, P49023, Q13485, Q9H2X6, Q9Y4E8, Q99967, Q15942, Q8WUH2, Q8TEW0	1207	92	16792	1.81463	1	0.863977	71.0568
GOTERM_MF_DIRECT	GO:0070087~chromo shadow domain binding	3	0.219138	0.0657345	P46100, Q6KC79, Q13111	1235	6	16881	6.83441	1	0.567188	65.7179
GOTERM_MF_DIRECT	GO:0004111~creatine kinase activity	3	0.219138	0.0657345	P17540, P12277, P06732	1235	6	16881	6.83441	1	0.567188	65.7179
GOTERM_BP_DIRECT	GO:0043967~histone H4 acetylation	6	0.438276	0.0678381	Q09472, Q9H2F5, P51587, Q96L91, Q5T5X7, Q15788	1207	31	16792	2.69268	1	0.873405	72.6035
GOTERM_MF_DIRECT	GO:0032947~protein complex scaffold	7	0.511322	0.0686424	Q99996, A5YKK6, Q15811, Q15019, Q8IX03, Q12802, Q99959	1235	40	16881	2.39204	1	0.578906	67.3599
GOTERM_BP_DIRECT	GO:0000717~nucleotide-excision repair, DNA duplex unwinding	5	0.36523	0.0686785	P54727, Q16531, Q13620, Q92466, Q86WJ1, K4DI93	1207	22	16792	3.16186	1	0.874671	73.0551
GOTERM_CC_DIRECT	GO:0012507~ER to Golgi transport vesicle membrane	8	0.584368	0.0698335	D6REX3, O75396, O60763, P04233, P36956, P53992, Q9Y6Y8, Q12772	1280	52	18224	2.19038	1	0.451998	66.2423
GOTERM_CC_DIRECT	GO:0030425~dendrite	32	2.33747	0.0700978	Q8NE35, Q96JI7, P42224, O43556, Q14289, Q14444, Q8IZU9, Q12830, Q17RY0, Q15147, P16389, Q9Y6X2, O43390, A0A087X0B7, P04629, P42345, A6NEM2, P20309, Q9UPA5, Q14980, Q9C0D5, Q00577, P46060, Q9UPU9, Q6UUV9, Q12955, Q9H3D4, Q9NZJ4, A0A087X165, P17600, O15116, Q9UL54	1280	335	18224	1.36	1	0.44925	66.3859
GOTERM_CC_DIRECT	GO:0005847~mRNA cleavage and polyadenylation specificity factor complex	4	0.292184	0.0701626	Q9H6E5, Q9C0J8, P48729, O95639	1280	14	18224	4.06786	1	0.445591	66.421
GOTERM_CC_DIRECT	GO:0000784~nuclear chromosome, telomeric region	15	1.09569	0.0720798	P27694, Q16531, Q9H0A0, Q00577, Q92878, P46100, O60934, P39748, P78527, Q13315, O95271, Q13535, O94842, P51587, Q96SD1	1280	130	18224	1.64279	1	0.450841	67.4448
GOTERM_MF_DIRECT	GO:0000987~core promoter proximal region sequence-specific DNA binding	5	0.36523	0.0723572	O43474, Q9NQL9, Q13485, Q92793, Q9P0U4	1235	22	16881	3.10655	1	0.594336	69.3505
GOTERM_MF_DIRECT	GO:0035257~nuclear hormone receptor binding	5	0.36523	0.0723572	P42224, Q09472, O75376, Q15596, Q15788	1235	22	16881	3.10655	1	0.594336	69.3505
GOTERM_BP_DIRECT	GO:0006887~exocytosis	11	0.803506	0.0731418	P63027, O75396, O14910, Q96FV2, Q03169, Q5T5C0, P23763, Q9NV70, Q6P1M3, A0A087X165, A8K0Z3	1207	83	16792	1.84378	1	0.889166	75.3383
GOTERM_MF_DIRECT	GO:0042803~protein homodimerization activity	65	4.74799	0.0733055	Q9UPN4, Q9H190, Q7Z589, P80188, P42224, Q86WG5, P19623, O95935, F8W9J4, Q4VX54, P08133, O75146, Q7RTS1, O60494, O00408, Q68CJ9, Q13613, Q9BQI3, Q03933, Q86XR8, Q15075, Q13137, P52952, O75208, O75460, Q9NQL9, P35354, F5GXQ8, Q9NWT6, Q9H2G2, P35680, O94804, O60749, P22413, A0A087WW73, O14503, Q9UHY1, O43283, Q9Y4B5, P17643, J3KQA9, O15405, P07333, Q9NQ66, O14920, O15409, Q9GZV5, Q96H72, P33981, Q5S…	1235	730	16881	1.21709	1	0.594795	69.8401
GOTERM_BP_DIRECT	GO:0031529~ruffle organization	4	0.292184	0.074166	P07333, Q7L576, P53365, P42345	1207	14	16792	3.97491	1	0.890785	75.8358
GOTERM_BP_DIRECT	GO:0033700~phospholipid efflux	4	0.292184	0.074166	A0A0A0MT16, O95477, Q86UK0, P02652	1207	14	16792	3.97491	1	0.890785	75.8358
GOTERM_BP_DIRECT	GO:0007064~mitotic sister chromatid cohesion	4	0.292184	0.074166	O60216, Q6KC79, Q9Y6X3, Q7Z3K3	1207	14	16792	3.97491	1	0.890785	75.8358
GOTERM_BP_DIRECT	GO:0040029~regulation of gene expression, epigenetic	4	0.292184	0.074166	Q9UQL6, P56524, Q9UKV0, Q9H4Z2	1207	14	16792	3.97491	1	0.890785	75.8358
GOTERM_BP_DIRECT	GO:1900153~positive regulation of nuclear-transcribed mRNA catabolic process, deadenylation-dependent decay	4	0.292184	0.074166	A5YKK6, Q8NE35, A0A1B0GU24, Q9UPQ9	1207	14	16792	3.97491	1	0.890785	75.8358
GOTERM_BP_DIRECT	GO:0070208~protein heterotrimerization	4	0.292184	0.074166	P12110, P12109, Q9BVL2, Q7Z3B4	1207	14	16792	3.97491	1	0.890785	75.8358
GOTERM_BP_DIRECT	GO:0007613~memory	9	0.657414	0.0747545	Q6UUV9, A0A087WW73, Q14573, O60229, Q8TE12, Q9NQ66, P35354, Q9UMN6, Q96AB6, P39748	1207	62	16792	2.01951	1	0.890905	76.1173
GOTERM_MF_DIRECT	GO:0003743~translation initiation factor activity	9	0.657414	0.0751137	Q7L2H7, Q9NRA8, Q9BQI3, O15372, A0A087WYN9, P41214, Q99613, A0A087WUT6, Q9Y262	1235	61	16881	2.01671	1	0.599634	70.7534
GOTERM_BP_DIRECT	GO:0003007~heart morphogenesis	6	0.438276	0.0758654	Q9ULJ6, Q6KC79, P52952, P42345, A0A087X0R0, Q9P2D1	1207	32	16792	2.60853	1	0.892753	76.6403
GOTERM_BP_DIRECT	GO:0070911~global genome nucleotide-excision repair	6	0.438276	0.0758654	P54727, Q16531, Q13620, Q92466, Q86WJ1, Q70EL2, K4DI93	1207	32	16792	2.60853	1	0.892753	76.6403
GOTERM_BP_DIRECT	GO:0007032~endosome organization	6	0.438276	0.0758654	P40818, Q96S99, O43752, A0A087WXL6, Q9UJC3, O75204	1207	32	16792	2.60853	1	0.892753	76.6403
GOTERM_BP_DIRECT	GO:0000722~telomere maintenance via recombination	6	0.438276	0.0758654	P27694, Q07864, Q92878, Q99973, P51587, P39748	1207	32	16792	2.60853	1	0.892753	76.6403
GOTERM_BP_DIRECT	GO:0045444~fat cell differentiation	10	0.73046	0.0769681	A0A087WW73, A0A087WTU9, O43474, P36956, Q09472, Q6UXH0, Q8TCU4, Q9NQ66, Q6KC79, P15336, Q96EK7, O75925	1207	73	16792	1.90578	1	0.89452	77.1488
GOTERM_MF_DIRECT	GO:0001076~transcription factor activity, RNA polymerase II transcription factor binding	4	0.292184	0.0773745	Q13485, P15336, P46937, Q8IZQ8	1235	14	16881	3.90538	1	0.60656	71.859
GOTERM_BP_DIRECT	GO:0001658~branching involved in ureteric bud morphogenesis	7	0.511322	0.0777386	P10071, Q13485, Q9NSC2, P48436, P01106, O14905, Q8TE57	1207	42	16792	2.3187	1	0.895189	77.4978
GOTERM_CC_DIRECT	GO:0090575~RNA polymerase II transcription factor complex	6	0.438276	0.0781185	Q15233, P27540, Q13485, Q9H2X6, D6RBZ0, P52952, Q99729	1280	33	18224	2.58864	1	0.474818	70.4822
UP_KEYWORDS	Synapse	32	2.33747	0.0782424	Q8NE35, Q86VH4, Q8N3V7, Q15811, O00468, Q9NVA2, Q9Y4G6, Q9Y250, Q17RY0, Q9C0C4, Q5T5C0, P16389, P23763, Q7L576, Q9Y6V0, Q96CX2, P20309, Q9UPA5, Q9C0D5, P63027, O00161, O14910, P11230, Q9UPU9, P46939, Q86SS6, Q6XZF7, Q12955, A0A087X165, P17600, Q96EV8, A0A075B6E5, E9PE96	1369	357	20581	1.34755	1	0.344845	68.3564
GOTERM_BP_DIRECT	GO:0001731~formation of translation preinitiation complex	5	0.36523	0.0786126	Q7L2H7, O15372, P41214, Q99613, Q9Y262	1207	23	16792	3.02439	1	0.89617	77.8876
GOTERM_BP_DIRECT	GO:0043044~ATP-dependent chromatin remodeling	5	0.36523	0.0786126	Q9HCK8, Q92922, Q8WXI9, F8VXC8, O14497	1207	23	16792	3.02439	1	0.89617	77.8876
GOTERM_BP_DIRECT	'GO:0006295~nucleotide-excision repair, DNA incision, 3''-to lesion'	5	0.36523	0.0786126	P27694, Q16531, Q13620, Q92466, Q86WJ1, K4DI93	1207	23	16792	3.02439	1	0.89617	77.8876
UP_KEYWORDS	Calmodulin-binding	16	1.16874	0.0809343	P46940, O00160, Q01082, O60266, Q86VI3, Q4G0U5, Q5T4S7, Q9UBL0, P55040, P11171, Q13813, Q15746, Q96SN8, O00159, P35749, Q07157	1369	152	20581	1.58248	1	0.351381	69.6368
GOTERM_CC_DIRECT	GO:0030139~endocytic vesicle	8	0.584368	0.0821162	O60494, P98164, A0A087WXL6, Q5SY18, O94827, O15400, O95477, Q15276, Q15811	1280	54	18224	2.10926	1	0.488563	72.3452
GOTERM_BP_DIRECT	GO:0007030~Golgi organization	10	0.73046	0.0823347	O60763, Q7RTS1, O43520, F5GXQ8, Q9Y6Y8, Q14789, P48729, Q15643, Q96JB2, O14578	1207	74	16792	1.88002	1	0.90552	79.4773
GOTERM_BP_DIRECT	GO:0000724~double-strand break repair via homologous recombination	10	0.73046	0.0823347	Q13315, P27694, Q96HA7, Q9NXL9, Q92878, O60934, Q68DK2, P51587, P49916, P39748	1207	74	16792	1.88002	1	0.90552	79.4773
GOTERM_MF_DIRECT	GO:0000977~RNA polymerase II regulatory region sequence-specific DNA binding	22	1.60701	0.0824358	Q99583, Q96BD5, P43699, P10071, Q8TE12, Q8TEY5, P15336, P35680, P39880, Q7Z6R9, P35398, Q8NFW5, Q9UMQ3, Q16559, Q7RTS1, Q9UN79, Q68CJ9, Q03933, Q13485, O14529, A0A0C4DG53, O95625, Q96CJ1	1235	208	16881	1.44574	1	0.626494	74.1937
GOTERM_MF_DIRECT	GO:0030215~semaphorin receptor binding	5	0.36523	0.0827436	O95754, Q99985, Q13591, O43157, Q9C0C4	1235	23	16881	2.97148	1	0.623624	74.3296
GOTERM_MF_DIRECT	GO:0008307~structural constituent of muscle	7	0.511322	0.0831026	Q15149, P06753, O76041, Q00872, P67936, O15273, P35749	1235	42	16881	2.27814	1	0.621035	74.4873
GOTERM_MF_DIRECT	GO:0015631~tubulin binding	7	0.511322	0.0831026	Q9Y3P9, Q96SN8, Q8IWC1, Q8NDL9, A0A024R216, Q9Y3E1, Q8IWS0, Q14679	1235	42	16881	2.27814	1	0.621035	74.4873
GOTERM_CC_DIRECT	GO:0033290~eukaryotic 48S preinitiation complex	4	0.292184	0.0832933	Q7L2H7, O15372, Q99613, Q9Y262	1280	15	18224	3.79667	1	0.489697	72.8724
GOTERM_CC_DIRECT	GO:0005662~DNA replication factor A complex	4	0.292184	0.0832933	P27694, Q96HA7, Q00577, O75934	1280	15	18224	3.79667	1	0.489697	72.8724
GOTERM_CC_DIRECT	GO:0005605~basal lamina	4	0.292184	0.0832933	P14543, O00468, Q6UX39, A0A0A0MQS9	1280	15	18224	3.79667	1	0.489697	72.8724
GOTERM_CC_DIRECT	GO:0031235~intrinsic component of the cytoplasmic side of the plasma membrane	4	0.292184	0.0832933	P20936, Q9UJF2, P11277, P02549	1280	15	18224	3.79667	1	0.489697	72.8724
UP_KEYWORDS	Developmental protein	75	5.47845	0.0837039	Q9UPN4, Q96A47, Q96J94, Q99985, P52594, P08138, P51449, O14905, O95935, A5YKK6, Q03169, Q9UJC3, Q8N9N5, P52952, Q8IUH3, Q9BY79, Q9NQL9, Q8NI99, Q8TE12, Q8WUQ7, P39880, O60902, Q8NDX5, Q9H4Z2, Q9H2Z4, Q2VWP7, Q8TAK6, P98082, Q99967, P78364, Q5VTY9, J3KQC0, Q155Q3, A0A140T9R5, Q9P2R6, Q9C0C7, P57059, Q2MV58, Q13591, O00468, Q96KR1, P61371, O43365, O75030, Q9C0C4, Q99626, P46531, Q9BY76, O95754, P48…	1369	949	20581	1.18811	1	0.358007	70.9038
GOTERM_CC_DIRECT	GO:0005884~actin filament	9	0.657414	0.0838072	Q92574, P46940, A0A0A0MT60, A0A087WXL6, P06753, P47756, P67936, Q12802, Q6P5Q4, Q5T1M5	1280	65	18224	1.97135	1	0.487981	73.0997
GOTERM_BP_DIRECT	GO:0010718~positive regulation of epithelial to mesenchymal transition	6	0.438276	0.084382	P46531, Q13145, Q13485, O43294, Q9GZV5, P98082	1207	33	16792	2.52949	1	0.909545	80.3049
GOTERM_BP_DIRECT	GO:0035194~posttranscriptional gene silencing by RNA	3	0.219138	0.0849909	A0A1B0GU24, Q9UPQ9, Q8NDV7	1207	7	16792	5.96236	1	0.909587	80.545
GOTERM_BP_DIRECT	GO:0019054~modulation by virus of host process	3	0.219138	0.0849909	O00629, P52292, O00505	1207	7	16792	5.96236	1	0.909587	80.545
GOTERM_BP_DIRECT	GO:0035735~intraciliary transport involved in cilium morphogenesis	3	0.219138	0.0849909	Q9UPN4, Q9Y2D8, Q15154	1207	7	16792	5.96236	1	0.909587	80.545
GOTERM_BP_DIRECT	GO:0021798~forebrain dorsal/ventral pattern formation	3	0.219138	0.0849909	P43699, P10071, P26367	1207	7	16792	5.96236	1	0.909587	80.545
GOTERM_BP_DIRECT	GO:2000766~negative regulation of cytoplasmic translation	3	0.219138	0.0849909	Q8NE35, Q9C0B0, Q17RY0	1207	7	16792	5.96236	1	0.909587	80.545
GOTERM_BP_DIRECT	GO:2000096~positive regulation of Wnt signaling pathway, planar cell polarity pathway	3	0.219138	0.0849909	Q969G9, Q9Y2G4, P98082	1207	7	16792	5.96236	1	0.909587	80.545
GOTERM_BP_DIRECT	GO:0003209~cardiac atrium morphogenesis	3	0.219138	0.0849909	G5E9C8, P46531, O60902	1207	7	16792	5.96236	1	0.909587	80.545
GOTERM_BP_DIRECT	GO:0060059~embryonic retina morphogenesis in camera-type eye	3	0.219138	0.0849909	Q92786, Q9H2X6, Q86Z02	1207	7	16792	5.96236	1	0.909587	80.545
GOTERM_BP_DIRECT	GO:1904837~beta-catenin-TCF complex assembly	7	0.511322	0.0851349	Q9HCS4, Q04726, Q09472, Q04727, Q04724, Q92793, P01106	1207	43	16792	2.26477	1	0.908386	80.6013
GOTERM_BP_DIRECT	GO:0045429~positive regulation of nitric oxide biosynthetic process	7	0.511322	0.0851349	O43474, P03372, Q14289, P35354, P10909, O75052, P42345	1207	43	16792	2.26477	1	0.908386	80.6013
GOTERM_BP_DIRECT	GO:0030155~regulation of cell adhesion	7	0.511322	0.0851349	P07332, Q99569, Q14289, P48436, E9PMT2, A0A0C4DGW9, A0A0A0MQS9	1207	43	16792	2.26477	1	0.908386	80.6013
UP_KEYWORDS	WD repeat	26	1.8992	0.0852321	Q9C0C7, Q9Y597, Q9C0J8, D6REX3, A4D1P6, Q04726, Q5T5C0, Q9Y4P3, Q92466, Q04727, Q04724, Q8TEQ6, Q969H0, O43379, Q96DN5, Q9HCU5, Q6P1M3, Q99973, Q9NSI6, Q15751, Q96BP3, Q6RI45, Q9BSC4, O15040, Q9Y485, Q99570	1369	281	20581	1.39101	1	0.360103	71.5817
GOTERM_CC_DIRECT	GO:0045171~intercellular bridge	7	0.511322	0.0853077	Q9UPN4, H7BYN4, Q9H6E5, Q96ST3, Q15286, Q02446, Q96EK4	1280	44	18224	2.26506	1	0.49047	73.7531
GOTERM_CC_DIRECT	GO:0005876~spindle microtubule	7	0.511322	0.0853077	Q13042, O95239, O75376, O00139, Q8WVK7, Q96R06, Q14980	1280	44	18224	2.26506	1	0.49047	73.7531
GOTERM_MF_DIRECT	GO:1990247~N6-methyladenosine-containing RNA binding	3	0.219138	0.0876656	A0A087WY31, Q9BYJ9, Q9Y5A9, Q7Z739	1235	7	16881	5.85807	1	0.637398	76.4147
GOTERM_BP_DIRECT	GO:1900034~regulation of cellular response to heat	10	0.73046	0.0879209	Q13315, P27694, Q13535, Q09472, Q9BVL2, O75694, Q92793, Q7Z3B4, P42345, P52948	1207	75	16792	1.85496	1	0.914078	81.6617
GOTERM_BP_DIRECT	GO:0043149~stress fiber assembly	4	0.292184	0.0879431	P05556, Q9BX66, Q14289, Q15942	1207	15	16792	3.70991	1	0.912615	81.6699
GOTERM_BP_DIRECT	GO:2000060~positive regulation of protein ubiquitination involved in ubiquitin-dependent protein catabolic process	4	0.292184	0.0879431	Q14289, Q96JB5, P10909, Q969H0	1207	15	16792	3.70991	1	0.912615	81.6699
GOTERM_CC_DIRECT	GO:0017053~transcriptional repressor complex	8	0.584368	0.0886944	Q99626, P10071, Q96ST3, P56524, O75376, Q01664, F8VXC8, Q13127	1280	55	18224	2.07091	1	0.500683	75.1737
GOTERM_BP_DIRECT	GO:0048675~axon extension	5	0.36523	0.089218	Q96JI7, O75385, P05556, Q7L576, O43157	1207	24	16792	2.89837	1	0.914301	82.1364
GOTERM_BP_DIRECT	GO:0030866~cortical actin cytoskeleton organization	5	0.36523	0.089218	Q9H4G0, Q9Y490, Q6P1M3, O14920, P11171	1207	24	16792	2.89837	1	0.914301	82.1364
GOTERM_BP_DIRECT	GO:0043087~regulation of GTPase activity	9	0.657414	0.0928072	P46940, Q15311, Q86VI3, Q86WG5, P21709, Q9UJF2, O43157, P42345, Q13976	1207	65	16792	1.9263	1	0.921346	83.3903
GOTERM_BP_DIRECT	GO:0035019~somatic stem cell population maintenance	9	0.657414	0.0928072	Q99626, O43474, Q13485, P21709, Q9NSC2, P48436, P46937, Q9UJQ4, P15056	1207	65	16792	1.9263	1	0.921346	83.3903
GOTERM_BP_DIRECT	GO:0045787~positive regulation of cell cycle	6	0.438276	0.0933788	Q9ULG6, O75179, Q92786, P01106, Q99967, A6NEM2	1207	34	16792	2.45509	1	0.921232	83.5821
GOTERM_CC_DIRECT	GO:0000785~chromatin	11	0.803506	0.0936171	P06400, P30279, O75179, Q15652, O60216, O94842, Q6KC79, Q9Y6X3, O15350, H7C3U5, Q8WYP5	1280	89	18224	1.75969	1	0.516614	77.1111
GOTERM_BP_DIRECT	GO:0030324~lung development	10	0.73046	0.0937263	P46531, P43699, P36956, P10071, P46379, Q92786, Q09472, P10070, P21246, P06850	1207	76	16792	1.83055	1	0.920617	83.6977
GOTERM_MF_DIRECT	GO:0042162~telomeric DNA binding	5	0.36523	0.0938165	E9PD50, Q9HAU5, Q92540, Q9UPR3, Q14103, Q96Q15	1235	24	16881	2.84767	1	0.659386	78.7975
GOTERM_MF_DIRECT	GO:0043015~gamma-tubulin binding	5	0.36523	0.0938165	Q96CW5, G3V140, Q86XR8, P51587, Q155Q3	1235	24	16881	2.84767	1	0.659386	78.7975
GOTERM_MF_DIRECT	GO:0017124~SH3 domain binding	14	1.02264	0.0944602	G5E9C8, P98164, A0A0B4J1S7, O14672, P40818, Q86TC9, Q9UI08, Q13625, Q99638, Q8N4X5, A0A075B6E5, O14578, Q9H013, P42566	1235	119	16881	1.6081	1	0.657924	79.0334
UP_KEYWORDS	Elliptocytosis	3	0.219138	0.0946052	P11171, P11277, P02549	1369	8	20581	5.6376	1	0.388844	75.4287
GOTERM_BP_DIRECT	GO:0051092~positive regulation of NF-kappaB transcription factor activity	15	1.09569	0.0961536	X6RLX0, Q8N5C8, P25963, O14920, Q86UE4, O00463, O15516, O43318, O43283, Q96BH1, P10909, P04629, Q9BYM8, Q9NYJ8, Q9Y6K9	1207	133	16792	1.56904	1	0.924571	84.484
GOTERM_CC_DIRECT	GO:0000139~Golgi membrane	51	3.72535	0.0970597	X6RLX0, P36406, Q15286, Q8TEY5, Q9HCG7, A8MVW5, O14617, Q12772, Q7L0Q8, Q8IZ52, D6REX3, P36956, Q9NP58, Q92562, Q9Y2C2, Q3V5L5, P39880, Q96JB2, Q8WWZ7, Q92734, P04233, Q68DE3, Q14789, A0A140T9R5, Q9UNP4, Q7Z7M8, Q8IY31, Q969W9, Q11130, Q9Y6Y8, G5E9W2, Q9NX95, Q08378, P46531, P53992, P42345, Q14980, Q96CN9, Q9Y2E8, Q9H3P7, Q9HCU5, Q96FL9, O14672, Q8N428, O43752, O95271, O75396, O60763, Q9UL01, O14…	1280	591	18224	1.22862	1	0.526155	78.3812
GOTERM_MF_DIRECT	GO:0019899~enzyme binding	32	2.33747	0.0985309	P42224, O75962, O15234, Q96EA4, Q9NQ66, F6M2K4, Q9BQA5, Q4VX54, P78527, P46531, Q9H7L9, Q14686, Q9Y6X2, Q5XKE5, Q8IWS0, O75460, P43699, Q9BWU1, D6RJ07, Q9H6E5, A0A075B749, P25963, Q99973, P35354, P20226, P17844, Q15788, A0A087WW73, P03372, Q15911, Q99638, B7Z4B8, O75925, O95155	1235	333	16881	1.31352	1	0.670147	80.4692
GOTERM_MF_DIRECT	GO:0051219~phosphoprotein binding	6	0.438276	0.098921	P06400, P00750, O15405, Q9Y4P3, P42345, Q8IWS0	1235	34	16881	2.41215	1	0.667671	80.6019
GOTERM_BP_DIRECT	GO:0032869~cellular response to insulin stimulus	10	0.73046	0.0997502	P22413, P63027, P42224, P30613, Q9UQL6, Q9BX66, Q9UKV0, P01106, P35568, P78527	1207	77	16792	1.80678	1	0.930616	85.5833
GOTERM_BP_DIRECT	GO:0001843~neural tube closure	10	0.73046	0.0997502	Q92574, Q92830, Q99967, Q9UJQ4, Q96Q89, O14497, A0A087X0R0, Q9BYW2, Q9C0C4, Q93074	1207	77	16792	1.80678	1	0.930616	85.5833

## Sheet: Hsa-Cat2
Category	Term	Count	%	PValue	Genes	List Total	Pop Hits	Pop Total	Fold Enrichment	Bonferroni	Benjamini	FDR
UP_KEYWORDS	Coiled coil	104	39.3939	1.32774e-22	P51531, P54259, Q6ZW49, Q12830, P23246, Q8IZQ8, F8W9J4, Q4VCS5, Q8IY92, Q9Y6Q9, A0A0C4DGH3, A0A0A0MQW9, Q9P1Z9, Q8WXH0, Q5JV73, Q9NZ56, Q13137, Q00839, Q15714, Q96JK9, Q9P2D1, A0A0A0MTS7, Q9H1B7, Q9ULU4, P78424, Q6ZU52, Q13950, Q9Y6R9, O60885, P24043, P40818, Q96EV2, Q15149, Q9NU22, Q9H9Q4, O60313, J3KQA9, Q16787, Q8NE86, Q6P995, Q96QZ7, O15409, Q9UGI6, O00461, Q9H0G5, P42858, Q8IWI9, Q99700, Q9U…	264	3036	20581	2.67051	3.57163e-20	3.57163e-20	1.74473e-19
UP_KEYWORDS	Phosphoprotein	179	67.803	5.7331e-20	P54253, P51531, P54259, Q6ZW49, Q8IZQ8, P23246, A0A087WWM5, Q12830, Q9NZB8, F8W9J4, Q4VCS5, Q8IY92, A0A1W2PQJ7, Q9Y6Q9, Q6NYC8, A0A0A0MQW9, A0A0C4DGH3, Q8WXH0, Q13137, Q9NZ56, Q00839, Q15714, P56645, Q9P2D1, Q08J23, E9PGF5, Q9H1B7, A0A0A0MTS7, Q6P988, Q9ULU4, Q76MJ5, Q13950, Q9Y6R9, O60885, Q147X3, Q93009, P40818, P46087, Q15149, Q96EV2, O95785, Q9NU22, Q6ZSS7, Q9H9Q4, Q02447, Q9UJV8, Q5THR3, P10…	264	8246	20581	1.69228	1.5422e-17	7.71101e-18	7.53362e-17
UP_KEYWORDS	Alternative splicing	201	76.1364	9.20556e-17	Q5T1Q4, Q8NEE8, P23246, A0A087WWM5, Q8IY92, Q5T953, O00408, Q8WXH0, Q7Z3B4, Q00839, Q15714, Q13772, Q9P2D1, Q08J23, E9PGF5, Q8NCT3, P78424, Q6ZU52, Q8TC41, Q13950, A6NFN9, P46087, O95785, Q76LX8, O60313, Q9UJV8, Q5THR3, J3KQA9, Q8IVW6, Q8NE86, A0A0X1KG68, Q2M2I8, Q96SA4, O76083, Q9UGI6, Q8IWI9, Q8WUY3, Q8TCY9, Q9ULH7, Q01826, Q8NDV7, Q8WX93, P10070, A8MVX0, Q96P47, O76074, Q86YA3, O43251, Q6ZU67,…	264	10587	20581	1.48008	2.9865e-14	9.99201e-15	1.44329e-13
UP_KEYWORDS	Nucleus	128	48.4848	9.83754e-16	P54253, P51531, P54259, Q6ZW49, Q12830, P23246, Q8IZQ8, F8W9J4, Q8IY92, A0A1W2PQJ7, Q9Y6Q9, O14512, Q8WXH0, P55316, Q9NZ56, Q7Z3B4, Q00839, Q15714, Q96JK9, P56645, Q9P2D1, Q08J23, A0A0A0MTS7, Q9H1B7, Q9UM63, P78424, Q13950, O60885, Q93009, P40818, P46087, O95785, Q86XK2, Q9NU22, Q9H9Q4, Q02447, Q9UJV8, Q5THR3, Q8IVW6, A0A0X1KG68, Q96RE7, P47974, O15409, P46531, Q9H0G5, Q96JM7, P42858, A8CG34, Q8N…	264	5244	20581	1.90287	2.68785e-13	6.71685e-14	1.31006e-12
GOTERM_CC_DIRECT	GO:0005634~nucleus	127	48.1061	6.63181e-14	P54253, P51531, P54259, Q6ZW49, Q8IZQ8, Q12830, P23246, Q9NZB8, F8W9J4, A0A1W2PQJ7, Q9Y6Q9, O14512, O00408, Q8WXH0, P55316, Q13137, Q00839, Q15714, Q96JK9, P56645, Q9P2D1, Q13772, Q08J23, Q9H1B7, Q9UM63, Q9ULU4, P78424, Q13950, O60885, Q93009, O95785, Q86XK2, Q9NU22, Q9H9Q4, Q02447, Q9UJV8, Q7Z5J8, Q5THR3, J3KQA9, Q8IVW6, A0A0X1KG68, Q96RE7, P47974, O15409, O95049, P46531, Q9H0G5, Q96JM7, P42858,…	240	5415	18224	1.78089	1.84259e-11	1.84259e-11	8.75411e-11
UP_KEYWORDS	Triplet repeat expansion	11	4.16667	2.34846e-12	Q99700, P54253, P10275, F5H211, Q9H1B7, Q96RN5, P42858, A0A1C7CYY9, P54259, O15265, A0A1W2PQJ7	264	30	20581	28.5847	6.31734e-10	1.26347e-10	3.08601e-09
UP_KEYWORDS	Methylation	42	15.9091	3.77139e-11	Q8IVW6, Q9UGU0, Q8NE35, O75179, P54259, P14866, Q9NX05, Q8TAE6, Q2M2I8, P23246, Q12830, Q12778, Q93074, Q9Y6Q9, Q9HCE9, Q7Z417, Q14686, Q8NHH9, Q9H307, Q8IWI9, Q00839, Q15637, Q9P2D1, A0A1C7CYX1, Q99700, Q96RN5, Q12888, Q92615, A8MVX0, Q13950, P49454, O75069, O43251, Q96DT7, Q15149, O14686, Q96EV2, P04150, O95785, Q9HCD6, Q5JVS0, Q8NB15	264	1001	20581	3.27098	1.01451e-08	1.69084e-09	4.95583e-08
UP_KEYWORDS	Activator	33	12.5	1.07566e-10	P51531, Q9UGU0, Q8NE35, Q86YW9, P23246, Q12778, Q8IZQ8, A0A1W2PQJ7, O15047, Q93074, Q9Y6Q9, P10275, P46531, P38398, Q14686, Q13495, Q9H307, Q96JK9, Q9P0K8, Q13772, Q10571, Q9ULH7, Q9NR55, Q9UM63, Q96RN5, P10070, Q12888, Q9Y261, Q9NQV7, Q8IZL2, Q9Y6H1, Q02447, Q9P0U4	264	661	20581	3.89202	2.89352e-08	4.13359e-09	1.41347e-07
UP_KEYWORDS	Transcription	68	25.7576	3.47525e-10	P54253, P51531, Q86YW9, P54259, Q6ZW49, Q12830, Q12778, P23246, Q8IZQ8, Q9Y6Q9, O75592, P55316, Q9H307, Q15714, Q96JK9, O15265, P56645, Q9P0K8, Q9P2D1, A0A1C7CYX1, Q13772, Q10571, Q9NR55, Q96RN5, Q9UM63, P78424, Q76MJ5, Q9H160, Q9UJQ4, Q13950, O60885, O14686, Q8IZL2, Q9UNY4, Q02447, Q92570, Q8NB15, Q5THR3, Q9UGU0, Q8IVW6, Q96RE7, O15409, O15047, Q93074, P10275, P46531, F5H211, Q96JM7, P38398, Q14…	264	2398	20581	2.21066	9.34841e-08	1.16855e-08	4.56667e-07
UP_KEYWORDS	Isopeptide bond	43	16.2879	4.44111e-10	P54253, Q9UGU0, Q96RE7, P14866, P23246, Q12830, F8W9J4, A0A1W2PQJ7, Q4VCS5, Q8IY92, P10275, P46531, F5H211, Q7Z417, Q9H0G5, Q5JSZ5, P38398, Q9H307, Q8IWI9, Q00839, O15265, A0A1C7CYX1, Q08J23, Q9ULH7, Q01826, A0A0A0MTS7, Q12888, Q9ULU4, Q9H160, Q9UJQ4, O60885, Q8N715, Q93009, Q3KQU3, Q96DT7, P46087, O14686, P04150, O95785, P10244, Q02447, O15446, Q9P0U4	264	1132	20581	2.96131	1.19466e-07	1.3274e-08	5.83588e-07
GOTERM_CC_DIRECT	GO:0005654~nucleoplasm	75	28.4091	6.2962e-10	P54253, P51531, P54259, Q6ZW49, Q9H583, Q12830, Q12778, P23246, Q8IY92, A0A1W2PQJ7, Q9Y6Q9, Q8WXH0, Q68CR1, Q9H307, Q00839, Q96JK9, O15265, A0A1C7CYX1, Q08J23, Q9H1B7, Q96RN5, Q9UM63, Q9H160, Q9UJQ4, Q13950, P49454, O60885, Q93009, P40818, O14686, Q8IZL2, Q9H9Q4, Q02447, O60313, Q92570, Q9UGU0, O15504, Q8IVW6, A0A0X1KG68, Q96QZ7, O95104, P14866, O15047, Q93074, O00461, P10275, P46531, F5H211, P42…	240	2784	18224	2.04562	1.75034e-07	8.75171e-08	8.31585e-07
UP_KEYWORDS	Transcription regulation	66	25	7.69823e-10	P54253, P51531, Q86YW9, P54259, Q6ZW49, Q12778, Q12830, P23246, Q8IZQ8, Q9Y6Q9, O75592, P55316, Q9H307, Q15714, Q96JK9, O15265, P56645, Q9P0K8, Q9P2D1, Q13772, A0A1C7CYX1, Q10571, Q9NR55, Q96RN5, Q9UM63, P78424, Q76MJ5, Q9H160, Q9UJQ4, Q13950, O60885, O14686, Q8IZL2, Q9UNY4, Q02447, Q92570, Q8NB15, Q5THR3, Q9UGU0, Q8IVW6, Q96RE7, O15409, O15047, Q93074, P10275, P46531, F5H211, Q96JM7, P38398, Q14…	264	2332	20581	2.20637	2.07082e-07	2.07082e-08	1.01159e-06
UP_KEYWORDS	Ubl conjugation	54	20.4545	1.02954e-09	P54253, Q02833, O60447, P23246, Q12778, Q12830, F8W9J4, A0A1W2PQJ7, Q8IY92, Q4VCS5, Q5JSZ5, O75592, Q9H307, Q00839, O15265, P56645, A0A1C7CYX1, Q8IY63, Q08J23, Q96S59, Q96RN5, Q9ULU4, Q9H160, Q9UJQ4, O60885, Q93009, P40818, O14686, P46087, O95785, Q02447, Q9UGU0, Q8NE35, Q96RE7, P14866, Q9Y4G8, O60566, P10275, P46531, F5H211, Q7Z417, Q9H0G5, P38398, P42858, Q8IWI9, Q9ULH7, Q01826, Q12888, Q8N715,…	264	1705	20581	2.46906	2.76945e-07	2.51768e-08	1.35287e-06
GOTERM_BP_DIRECT	GO:0045944~positive regulation of transcription from RNA polymerase II promoter	35	13.2576	3.57659e-07	Q8IVW6, P51531, Q9UGU0, Q86YW9, Q12778, Q8IZQ8, A0A1W2PQJ7, Q9Y6Q9, Q93074, P10275, P46531, P38398, Q14686, Q58WW2, O15265, Q96JK9, Q9P0K8, Q9P2D1, P22004, Q9ULH7, Q9H1B7, Q9UM63, P10070, Q12888, O75909, Q9UJQ4, O60885, Q9Y261, O14686, Q8IZL2, P04150, Q9Y6H1, P10244, Q02447, Q92570	227	981	16792	2.63922	0.000472357	0.000472357	0.000585126
GOTERM_CC_DIRECT	GO:0005737~cytoplasm	105	39.7727	5.91396e-07	P54253, P54259, Q12830, P23246, F8W9J4, Q4VCS5, Q8IY92, Q6NYC8, Q9Y6Q9, A0A0C4DGH3, A0A0A0MQW9, O14512, O00408, Q8WXH0, Q13137, Q15714, P56645, E9PGF5, Q08J23, Q9ULU4, Q8TC41, Q13950, Q147X3, O60885, P40818, Q15149, Q86XK2, Q9NU22, Q02447, O60313, Q7Z5J8, J3KQA9, A0A0X1KG68, Q96RE7, Q96QZ7, P47974, Q2M2I8, Q9Y4G8, Q9UGI6, P42858, Q8NEZ2, Q8IWI9, Q99700, Q8WUY3, Q8TCY9, Q8WX93, Q92615, Q96P47, O43…	240	5222	18224	1.52681	0.000164395	5.48012e-05	0.000781097
UP_KEYWORDS	Cytoplasm	95	35.9848	3.80655e-06	P54253, Q9UBL6, Q9BX97, Q9UEW8, Q02833, P54259, Q96NL6, Q96M02, O60447, A0A1B0GU45, Q8TAE6, Q12830, Q12778, P23246, F8W9J4, A0A1W2PQJ7, Q6NYC8, Q9Y6Q9, A0A0C4DGH3, O14512, O00408, Q8WXH0, Q13137, Q9NZ56, Q9NXG0, Q53S48, Q00839, Q15714, O15265, P56645, E9PGF5, Q8IZT6, Q08J23, Q96S59, A0A0A0MTS7, Q96RN5, O60346, Q9UJQ4, Q8N8E3, A0A0C4DG24, P49454, Q147X3, Q93009, Q3KQU3, Q8IYL2, P40818, Q15149, Q7Z…	264	4816	20581	1.5378	0.00102344	8.53266e-05	0.00500191
GOTERM_MF_DIRECT	GO:0003682~chromatin binding	18	6.81818	2.28679e-05	P51531, Q01826, O75179, P10070, Q9ULU4, Q9H160, Q12778, Q13950, P23246, O60885, P49454, Q93074, P10275, F8WBW8, Q14686, Q02447, O15265, Q9P2D1	228	391	16881	3.40847	0.00692781	0.00692781	0.0306158
GOTERM_BP_DIRECT	GO:0006351~transcription, DNA-templated	49	18.5606	2.40801e-05	P54253, P51531, Q9UGU0, Q86YW9, Q96RE7, P54259, O15409, Q6ZW49, Q12830, Q12778, P23246, O15047, Q9Y6Q9, P10275, F5H211, Q96JM7, P38398, Q13495, O75592, P55316, Q9H307, Q14774, Q8IWI9, Q15637, O15265, P56645, Q9P2D1, A0A1C7CYX1, Q13772, Q9ULH7, Q10571, Q01826, Q9UM63, Q12888, Q9H160, Q76MJ5, O60885, Q9NQV7, Q9Y261, Q96DT7, O14686, P04150, Q5JVS0, Q9Y6H1, Q02447, Q92570, Q8NB15, Q5THR3, Q9P0U4	227	1955	16792	1.85407	0.0313096	0.0157793	0.0393876
UP_KEYWORDS	Chromosomal rearrangement	16	6.06061	2.82099e-05	Q9ULH7, Q10571, Q01826, Q12888, O60447, O15409, A0A087WWM5, Q12778, P23246, O60885, Q9H5P4, Q8IZL2, Q9H9Q4, A1L167, Q92570, Q13772	264	334	20581	3.73453	0.00755985	0.000583566	0.0370631
GOTERM_CC_DIRECT	GO:0016363~nuclear matrix	9	3.40909	4.12117e-05	P54253, F5H211, Q01826, P54259, Q6ZW49, P23246, P49454, O15265, Q9P0U4	240	97	18224	7.04536	0.0113917	0.00286017	0.0544176
GOTERM_BP_DIRECT	GO:0045893~positive regulation of transcription, DNA-templated	20	7.57576	7.20479e-05	P51531, P10070, Q12888, Q9H160, Q8IZQ8, Q12778, Q13950, Q12830, Q9Y261, A0A1W2PQJ7, Q9Y6Q9, Q93074, P10275, P46531, P38398, Q14686, Q02447, Q9P0K8, Q9P0U4, Q13772	227	515	16792	2.87276	0.0907896	0.0312282	0.117804
UP_KEYWORDS	Polymorphism	185	70.0758	7.46471e-05	P54253, P51531, P54259, Q6ZW49, Q8NEE8, Q9NZB8, F8W9J4, Q8IY92, A0A1W2PQJ7, Q9Y6Q9, Q6NYC8, A0A0A0MQW9, Q5T953, Q9P1Z9, O00408, Q8WXH0, Q86Y38, P55316, Q13137, Q9NZ56, Q00839, Q15714, Q96JK9, P56645, Q9P2D1, Q13772, Q08J23, E9PGF5, Q9UM63, Q9H1B7, A0A0A0MTS7, Q9ULU4, Q76MJ5, Q6ZU52, Q8TC41, Q13950, O60885, P24043, P40818, A6NFN9, P46087, Q15149, Q96EV2, Q86XK2, Q76LX8, Q9NU22, Q6ZSS7, Q9H9Q4, Q02…	264	12043	20581	1.19757	0.0198805	0.00143332	0.0980461
GOTERM_MF_DIRECT	GO:0005515~protein binding	147	55.6818	0.000112737	P54253, P51531, P54259, Q6ZW49, Q8IZQ8, P23246, Q12830, A0A087WWM5, F8W9J4, Q4VCS5, Q8IY92, A0A1W2PQJ7, Q9Y6Q9, Q6NYC8, A0A0C4DGH3, O14512, O00408, Q8WXH0, P55316, Q13137, Q7Z3B4, Q00839, Q15714, P56645, Q9P2D1, E9PGF5, A0A0A0MTS7, Q9ULU4, Q6ZU52, Q13950, O60885, Q147X3, Q93009, P40818, P46087, Q15149, O95785, Q86XK2, Q76LX8, Q9NU22, Q9H9Q4, Q02447, O60313, J3KQA9, Q8IVW6, Q8NE86, Q96QZ7, P47974,…	228	8785	16881	1.23891	0.0336933	0.016991	0.150849
UP_KEYWORDS	RNA-binding	22	8.33333	0.000138581	P54253, Q8NE35, Q9H0Z9, Q08J23, O75179, Q8NDV7, O95104, Q92615, P47974, Q5T481, P14866, P23246, Q7Z5Q1, O15047, O43251, Q96EV2, P46087, Q7Z417, Q9H0G5, P04150, Q15637, Q00839	264	665	20581	2.57907	0.0365945	0.00248231	0.18195
GOTERM_CC_DIRECT	GO:0035097~histone methyltransferase complex	5	1.89394	0.000209948	O14686, Q14686, Q6ZW49, O15047, Q9P0U4	240	23	18224	16.5072	0.0567008	0.0116065	0.276939
GOTERM_BP_DIRECT	GO:0006367~transcription initiation from RNA polymerase II promoter	10	3.78788	0.000219272	P10275, P46531, Q96RN5, Q8IZL2, P04150, Q14686, Q53S48, Q92570, Q96JK9, Q93074	227	152	16792	4.86668	0.251504	0.0698621	0.358123
GOTERM_BP_DIRECT	GO:0006355~regulation of transcription, DNA-templated	38	14.3939	0.000235439	P51531, Q9UGU0, P47974, Q12830, O15047, Q9Y6Q9, P10275, P46531, F5H211, Q96JM7, A8CG34, O75592, Q14774, Q9H307, Q8IWI9, Q15637, Q15714, Q9P2D1, Q10571, Q01826, Q9ULU4, O75909, Q76MJ5, P78424, Q9H160, Q9UJQ4, Q13950, Q9NQV7, Q96DT7, O14686, P04150, Q9UNY4, Q5JVS0, P56179, Q02447, Q8NB15, Q5THR3, Q9P0U4	227	1504	16792	1.86901	0.267324	0.0603147	0.38448
UP_KEYWORDS	Acetylation	66	25	0.000492002	P51531, Q9UEW8, P54259, Q96NL6, Q8TAE6, Q9H583, Q12830, Q12778, P23246, Q9NZB8, Q6NYC8, Q9Y6Q9, Q8WXH0, Q9H307, Q9NXG0, Q00839, Q96JK9, Q9P0K8, A0A1C7CYX1, Q08J23, Q10571, Q96S59, O60346, Q9ULU4, Q9Y6R9, P49454, Q147X3, O60885, Q93009, P46087, Q15149, Q96EV2, O14686, Q7Z7E8, Q9NU22, Q6ZSS7, Q02447, O60313, Q6YN16, Q9UGU0, Q8IVW6, Q8NE86, O75179, Q6VY07, O95104, P14866, Q2M2I8, O60566, Q93074, Q9H…	264	3424	20581	1.5027	0.123993	0.00823968	0.644591
GOTERM_MF_DIRECT	GO:0044822~poly(A) RNA binding	30	11.3636	0.000596474	O15504, Q9UGU0, Q9H0Z9, Q8NE35, O75179, O95104, P47974, P14866, Q9NX05, Q9H583, P23246, Q7Z5Q1, Q7Z417, Q9H0G5, Q5JSZ5, Q9H307, Q15637, Q00839, Q99700, E9PGF5, Q08J23, Q8NDV7, Q92615, O43251, Q15149, Q96EV2, P46087, Q96FQ6, Q9HBL0, Q9UJV8, O15446	228	1129	16881	1.96739	0.165884	0.0586693	0.795735
UP_KEYWORDS	Cytoskeleton	29	10.9848	0.000706125	J3KQA9, Q02833, Q4G0U5, Q96NL6, Q96M02, O60447, A0A1B0GU45, F8W9J4, O60566, Q6NYC8, Q8WXH0, Q13137, Q9NZ56, Q9NXG0, O15265, Q08J23, Q8IZT6, E9PGF5, Q8WX93, Q8TF72, Q8N8E3, P35236, P49454, Q9C0B2, Q3KQU3, Q15149, P04150, Q9UPV0, Q9HBL0, O95613	264	1138	20581	1.98664	0.173053	0.0111151	0.923922
UP_KEYWORDS	Spinocerebellar ataxia	5	1.89394	0.000796724	Q99700, P54253, F5H211, A0A1C7CYY9, O15265	264	33	20581	11.8119	0.192978	0.0118407	1.04189
GOTERM_MF_DIRECT	GO:0001105~RNA polymerase II transcription coactivator activity	5	1.89394	0.00148479	P51531, Q9ULH7, Q86YW9, Q8IZQ8, Q93074	228	37	16881	10.0053	0.363462	0.106785	1.96995
GOTERM_MF_DIRECT	GO:0003713~transcription coactivator activity	11	4.16667	0.00198654	P51531, Q9UGU0, Q9ULH7, Q8IZL2, P38398, Q14686, Q8IZQ8, Q96JK9, Q9Y6Q9, Q13772, Q93074	228	248	16881	3.28401	0.453657	0.113879	2.62748
GOTERM_BP_DIRECT	GO:0030521~androgen receptor signaling pathway	5	1.89394	0.00218997	P10275, P38398, Q9Y6Q9, Q13772, Q93074	227	41	16792	9.02117	0.944763	0.382877	3.52314
GOTERM_BP_DIRECT	GO:0051568~histone H3-K4 methylation	4	1.51515	0.00231565	O14686, Q6ZW49, O15047, Q9P0U4	227	20	16792	14.7947	0.95323	0.354353	3.72174
GOTERM_MF_DIRECT	GO:0044212~transcription regulatory region DNA binding	10	3.78788	0.00241179	P51531, P10275, Q9UGU0, O14686, P38398, P14866, Q9UJQ4, P23246, Q9Y261, A0A1C7CYX1	228	213	16881	3.47603	0.520048	0.115157	3.18157
GOTERM_BP_DIRECT	GO:0071321~cellular response to cGMP	3	1.13636	0.00261041	O00408, Q9Y3Q4, Q9Y4G8	227	6	16792	36.9868	0.968345	0.350536	4.18605
GOTERM_MF_DIRECT	GO:0000166~nucleotide binding	13	4.92424	0.0027046	Q8NE35, Q9H0Z9, O94886, Q8NDV7, Q92615, O95104, Q5T481, P14866, P23246, Q7Z5Q1, O15047, O43251, Q96EV2	228	348	16881	2.76584	0.561025	0.110963	3.5614
GOTERM_BP_DIRECT	GO:0007221~positive regulation of transcription of Notch receptor target	3	1.13636	0.00362221	P46531, Q8IZL2, Q96JK9	227	7	16792	31.703	0.991718	0.412938	5.76387
GOTERM_BP_DIRECT	GO:0046069~cGMP catabolic process	3	1.13636	0.00362221	O00408, O76083, O76074	227	7	16792	31.703	0.991718	0.412938	5.76387
GOTERM_MF_DIRECT	GO:0030552~cAMP binding	4	1.51515	0.00394235	O00408, Q9Y3Q4, O60741, Q9Y4G8	228	24	16881	12.3399	0.69906	0.139383	5.1518
UP_KEYWORDS	Chromatin regulator	11	4.16667	0.00399192	O14686, Q01826, P04150, Q96JM7, Q9H160, Q12830, O60885, Q9Y261, Q9NQV7, O15047, Q9P2D1	264	287	20581	2.98795	0.659035	0.0550567	5.12037
GOTERM_BP_DIRECT	GO:0016569~covalent chromatin modification	7	2.65152	0.00425258	P04150, Q96JM7, Q9H160, Q12830, O60885, Q9Y261, Q9P2D1	227	113	16792	4.58243	0.99641	0.430481	6.73452
UP_KEYWORDS	DNA-binding	41	15.5303	0.00449904	P54253, Q8IVW6, P51531, Q9UGU0, A0A0X1KG68, P47974, O15409, P23246, Q12778, P10275, P38398, P55316, Q14774, Q9H307, Q8IWI9, Q00839, Q8IXK0, Q9P0K8, Q9P2D1, A0A1C7CYX1, Q9NR55, Q01826, Q9UM63, P10070, Q12888, P78424, Q9UJQ4, Q13950, Q9Y261, Q96DT7, P04150, Q9UNY4, P10244, Q9H9Q4, P56179, Q02447, Q9UJV8, Q92570, Q96T25, Q8NB15, Q9P0U4	264	2050	20581	1.55917	0.702688	0.0588461	5.7532
UP_KEYWORDS	Neurodegeneration	11	4.16667	0.00460562	Q99700, P54253, P10275, F5H211, P42858, A0A1C7CYY9, P54259, Q9Y6H1, Q8NEZ2, O60313, O15265	264	293	20581	2.92676	0.711129	0.0574177	5.88571
GOTERM_CC_DIRECT	GO:0045111~intermediate filament cytoskeleton	5	1.89394	0.00477076	P51531, Q15149, Q8WXH0, Q9NU22, F8W9J4	240	52	18224	7.30128	0.735376	0.198743	6.12083
GOTERM_BP_DIRECT	GO:0016925~protein sumoylation	7	2.65152	0.00503701	O15504, P38398, Q12888, A8CG34, Q02447, Q7Z3B4, Q8IXK0	227	117	16792	4.42577	0.998732	0.454704	7.92928
GOTERM_MF_DIRECT	GO:0051371~muscle alpha-actinin binding	3	1.13636	0.00609	A0A0A0MTS7, Q8WX93, Q9UMS6	228	9	16881	24.6798	0.843863	0.18644	7.85387
GOTERM_CC_DIRECT	GO:0097539~ciliary transition fiber	3	1.13636	0.00719083	Q96NL6, Q9UPV0, P49454	240	10	18224	22.78	0.865511	0.249196	9.09159
GOTERM_BP_DIRECT	GO:0030217~T cell differentiation	4	1.51515	0.00747161	Q9H9Q4, Q02447, Q13950, Q9P2D1	227	30	16792	9.86314	0.99995	0.562023	11.5465
GOTERM_MF_DIRECT	GO:0008270~zinc ion binding	27	10.2273	0.00792193	Q9UGU0, Q5T481, Q12830, A0A1W2PQJ7, P10275, Q6ZT12, P07902, P38398, O75592, Q8IXK0, Q15637, P10070, Q9ULU4, Q9H160, A8K979, O43255, Q86YA3, O95487, O14686, P04150, Q9UNA0, Q9UNY4, Q76LX8, Q86XK2, Q8N3F8, Q92570, Q9P0U4	228	1169	16881	1.71006	0.910888	0.214775	10.1022
GOTERM_BP_DIRECT	GO:0000122~negative regulation of transcription from RNA polymerase II promoter	19	7.19697	0.00867256	P22004, P51531, Q8NE35, Q01826, Q9NR55, Q9H1B7, P10070, P54259, O15409, Q9UJQ4, P23246, Q8IZQ8, Q12778, Q12830, P46531, O00408, Q02447, Q92570, P56645	227	720	16792	1.95208	0.99999	0.587331	13.2813
GOTERM_MF_DIRECT	GO:0000978~RNA polymerase II core promoter proximal region sequence-specific DNA binding	12	4.54545	0.00875907	P10275, Q8IVW6, Q9NR55, P04150, P10070, O15409, P10244, Q13950, Q92570, Q9Y261, Q9P0K8, Q9P2D1	228	355	16881	2.50274	0.931058	0.215834	11.1127
UP_KEYWORDS	Actin-binding	10	3.78788	0.00893152	Q9ULH7, Q15149, E9PGF5, Q8WX93, Q8WXH0, Q8TF72, Q9NZ56, Q9UMS6, Q9HBL0, F8W9J4, Q6NYC8	264	274	20581	2.84519	0.910487	0.103896	11.1208
GOTERM_MF_DIRECT	GO:0035925~mRNA 3'-UTR AU-rich region binding	3	1.13636	0.00914087	Q8NE35, P47974, Q7Z5Q1	228	11	16881	20.1926	0.938677	0.207556	11.57
GOTERM_MF_DIRECT	GO:0043565~sequence-specific DNA binding	15	5.68182	0.0104036	P10070, O15409, Q9UJQ4, Q12778, Q12830, Q9Y261, P10275, P46531, P04150, P55316, Q9Y6H1, Q14774, P56179, Q92570, Q9P0K8	228	518	16881	2.144	0.958383	0.21695	13.0671
GOTERM_BP_DIRECT	GO:0006397~mRNA processing	8	3.0303	0.0107809	Q9H0Z9, Q9H0G5, Q9UNY4, P14866, Q5T481, Q76MJ5, P23246, O43251	227	179	16792	3.30608	0.999999	0.640405	16.2498
GOTERM_BP_DIRECT	GO:0031581~hemidesmosome assembly	3	1.13636	0.0108905	Q16787, Q15149, F8W9J4	227	12	16792	18.4934	0.999999	0.618768	16.4015
GOTERM_MF_DIRECT	GO:0008022~protein C-terminus binding	8	3.0303	0.0116798	Q99700, P54253, Q96QZ7, Q96NL6, P49454, F8W9J4, Q93009, Q93074	228	182	16881	3.25448	0.971888	0.22517	14.5564
UP_KEYWORDS	Zinc-finger	35	13.2576	0.0119543	O15504, Q9UGU0, P47974, O15409, Q12830, A0A1W2PQJ7, P10275, Q6ZT12, P38398, O75592, Q8IXK0, Q15637, Q6ZWE6, Q9H1B7, Q9UM63, P10070, Q9ULU4, Q9H160, Q96P47, O43255, Q8TC41, Q9UJQ4, Q9NQV7, Q8IYL2, Q96DT7, O14686, P04150, O95785, Q86XK2, Q96JP5, Q02447, Q92570, Q96T25, Q8NB15, Q9P0U4	264	1781	20581	1.53203	0.960643	0.131212	14.6178
GOTERM_MF_DIRECT	GO:0001104~RNA polymerase II transcription cofactor activity	4	1.51515	0.0123596	Q96RN5, Q86YW9, Q12888, Q93074	228	36	16881	8.22661	0.977194	0.222793	15.3399
GOTERM_CC_DIRECT	GO:0005694~chromosome	6	2.27273	0.0124415	P38398, Q86XK2, A0A1B0GU45, O60885, Q9NQV7, O15446	240	105	18224	4.33905	0.969206	0.352771	15.2407
UP_KEYWORDS	Bromodomain	4	1.51515	0.0134341	P51531, Q9ULU4, Q12830, O60885	264	39	20581	7.99573	0.973702	0.140664	16.283
UP_KEYWORDS	Ubl conjugation pathway	17	6.43939	0.0143672	O43255, Q8TC41, Q93009, A0A0C4DGH3, P40818, Q6ZT12, F5H211, O14512, Q7Z7E8, Q8NBR6, P38398, Q86XK2, O75592, Q58WW2, Q9UF56, Q96JP5, A1L167	264	680	20581	1.94896	0.979612	0.144195	17.3176
GOTERM_MF_DIRECT	GO:0001077~transcriptional activator activity, RNA polymerase II core promoter proximal region sequence-specific binding	9	3.40909	0.0147077	P10275, Q8IVW6, P04150, P10070, P10244, Q13950, Q92570, Q8IZQ8, Q9P0K8	228	236	16881	2.82354	0.988939	0.245365	17.9957
GOTERM_MF_DIRECT	GO:0047555~3',5'-cyclic-GMP phosphodiesterase activity	3	1.13636	0.0147286	O00408, O76083, O76074	228	14	16881	15.8656	0.98901	0.233056	18.0191
GOTERM_BP_DIRECT	GO:1900153~positive regulation of nuclear-transcribed mRNA catabolic process, deadenylation-dependent decay	3	1.13636	0.0147527	P50616, Q8NE35, P47974	227	14	16792	15.8515	1	0.706858	21.5847
GOTERM_MF_DIRECT	GO:0008134~transcription factor binding	10	3.78788	0.0149174	P10275, P42858, Q9Y6H1, Q12830, Q8IZQ8, P49454, Q9Y261, Q93009, O43251, A0A1C7CYX1	228	284	16881	2.60702	0.989632	0.224181	18.2291
UP_KEYWORDS	Epidermolysis bullosa	3	1.13636	0.0153071	Q16787, Q15149, F8W9J4	264	15	20581	15.5917	0.984227	0.147511	18.3477
GOTERM_BP_DIRECT	GO:0000226~microtubule cytoskeleton organization	5	1.89394	0.0153798	F5H211, O95613, F8W9J4, O15265, Q3KQU3	227	71	16792	5.20941	1	0.700124	22.3972
GOTERM_CC_DIRECT	GO:0005814~centriole	6	2.27273	0.0166388	P42858, Q96M02, Q96NL6, Q9UPV0, Q9NXG0, O95613	240	113	18224	4.03186	0.990576	0.404454	19.8771
GOTERM_BP_DIRECT	GO:0045892~negative regulation of transcription, DNA-templated	14	5.30303	0.0177863	P54253, P51531, Q96RE7, O15409, Q76MJ5, Q13950, Q12778, P23246, P49454, O43251, P46531, P38398, P55316, Q02447	227	499	16792	2.07541	1	0.73208	25.4427
GOTERM_CC_DIRECT	GO:0005635~nuclear envelope	7	2.65152	0.0185446	O15504, A8CG34, Q8WXH0, A0A1B0GU45, Q7Z3B4, P49454, F8W9J4	240	159	18224	3.34298	0.994504	0.405705	21.904
UP_KEYWORDS	mRNA splicing	9	3.40909	0.0190009	Q9H0Z9, Q9H0G5, Q9UNY4, Q5T481, Q9H307, Q15637, Q00839, P23246, O43251	264	260	20581	2.69856	0.994261	0.173972	22.2821
GOTERM_BP_DIRECT	GO:0010613~positive regulation of cardiac muscle hypertrophy	3	1.13636	0.0191143	Q92570, O76083, O76074	227	16	16792	13.87	1	0.738629	27.0748
UP_KEYWORDS	Repressor	15	5.68182	0.0205064	P54253, Q8NE35, Q9NR55, Q01826, Q86YW9, P10070, Q96RE7, O15409, P23246, Q93074, Q02447, Q15637, Q8IWI9, Q15714, Q5THR3	264	592	20581	1.9753	0.996203	0.180496	23.8349
GOTERM_MF_DIRECT	GO:0030553~cGMP binding	3	1.13636	0.0214386	O00408, Q9Y4G8, O76074	228	17	16881	13.0658	0.998623	0.293016	25.1874
GOTERM_CC_DIRECT	GO:0005819~spindle	6	2.27273	0.021685	Q08J23, P04150, O60447, Q9NZ56, P49454, Q3KQU3	240	121	18224	3.76529	0.997745	0.425393	25.1407
GOTERM_BP_DIRECT	GO:0050885~neuromuscular process controlling balance	4	1.51515	0.023887	A0A1C7CYZ0, A0A1C7CYY9, Q92570, O43251	227	46	16792	6.43248	1	0.797474	32.6679
GOTERM_MF_DIRECT	GO:0042800~histone methyltransferase activity (H3-K4 specific)	3	1.13636	0.0239076	O14686, O15047, Q9P0U4	228	18	16881	12.3399	0.999361	0.307751	27.6758
UP_KEYWORDS	S-adenosyl-L-methionine	7	2.65152	0.0245992	Q8IYL2, Q08J23, P46087, O14686, Q9NZB8, Q9NQV7, O15047	264	174	20581	3.13625	0.998769	0.206286	27.9125
GOTERM_MF_DIRECT	GO:0008013~beta-catenin binding	5	1.89394	0.024653	P10275, Q86YW9, Q12778, O15047, Q93074	228	82	16881	4.5146	0.999494	0.303268	28.4119
UP_KEYWORDS	Tumor suppressor	7	2.65152	0.0264622	Q8IVW6, Q10571, P38398, O60346, Q96M02, Q9H307, O60566	264	177	20581	3.0831	0.999264	0.213744	29.7009
GOTERM_BP_DIRECT	GO:0003365~establishment of cell polarity involved in ameboidal cell migration	2	0.757576	0.0267372	Q8IY63, Q4VCS5	227	2	16792	73.9736	1	0.81819	35.8132
GOTERM_BP_DIRECT	GO:1900248~negative regulation of cytoplasmic translational elongation	2	0.757576	0.0267372	Q8NE35, Q7Z5Q1	227	2	16792	73.9736	1	0.81819	35.8132
GOTERM_MF_DIRECT	GO:0003730~mRNA 3'-UTR binding	4	1.51515	0.028097	Q9H0Z9, Q8NE35, P47974, Q7Z5Q1	228	49	16881	6.04404	0.999827	0.325516	31.7235
GOTERM_BP_DIRECT	GO:0006338~chromatin remodeling	5	1.89394	0.0288064	P51531, Q01826, Q12830, O60885, Q9P2D1	227	86	16792	4.30079	1	0.827109	38.0096
UP_KEYWORDS	cGMP	3	1.13636	0.0291178	O00408, O76083, O76074	264	21	20581	11.1369	0.999647	0.226182	32.1795
GOTERM_MF_DIRECT	GO:0030374~ligand-dependent nuclear receptor transcription coactivator activity	4	1.51515	0.0311487	Q14686, Q58WW2, Q9Y6Q9, Q93074	228	51	16881	5.80702	0.999934	0.341804	34.539
GOTERM_BP_DIRECT	GO:0075733~intracellular transport of virus	4	1.51515	0.0312164	O15504, A8CG34, Q8NEZ2, Q7Z3B4	227	51	16792	5.80185	1	0.838216	40.4789
GOTERM_BP_DIRECT	GO:0097150~neuronal stem cell population maintenance	3	1.13636	0.0320139	P46531, Q8IZT6, Q12778	227	21	16792	10.5677	1	0.833193	41.2753
GOTERM_BP_DIRECT	GO:0007492~endoderm development	3	1.13636	0.0320139	P46531, Q12830, Q93074	227	21	16792	10.5677	1	0.833193	41.2753
GOTERM_CC_DIRECT	GO:0030529~intracellular ribonucleoprotein complex	6	2.27273	0.0336183	Q99700, Q9H0G5, P38398, P47974, P14866, Q00839	240	136	18224	3.35	0.999926	0.54716	36.3427
UP_KEYWORDS	Developmental protein	20	7.57576	0.0360658	P22004, Q9ULH7, Q10571, P10070, P47974, Q8TF72, Q9Y4G8, A0A087WWM5, P49454, Q9Y261, Q93009, A0A0C4DGH3, P46531, P55316, Q9NZ56, P56179, Q8NEM7, Q8IXK0, Q96T25, Q6DKJ4	264	949	20581	1.64296	0.999949	0.265658	38.2874
UP_KEYWORDS	DNA damage	10	3.78788	0.037668	P38398, Q12888, Q9UPV0, Q6ZW49, Q9H9Q4, Q9NZ56, P23246, O60885, Q8IY92, Q93009	264	352	20581	2.21473	0.999967	0.268738	39.6219
GOTERM_MF_DIRECT	GO:0004114~3',5'-cyclic-nucleotide phosphodiesterase activity	3	1.13636	0.0378412	O00408, O76083, O76074	228	23	16881	9.65732	0.999992	0.386531	40.3413
GOTERM_BP_DIRECT	GO:0001501~skeletal system development	6	2.27273	0.0378875	P22004, P10070, P13942, P56179, A0A1W2PQJ7, Q9P2D1	227	137	16792	3.23972	1	0.870087	46.841
UP_KEYWORDS	Cell cycle	15	5.68182	0.0403713	Q8IZT6, Q8TCY9, Q9H0Z9, Q08J23, A0A0X1KG68, Q8TDN4, O60447, O75909, O43255, P49454, O60566, P40818, P04150, P38398, Q9UPV0	264	650	20581	1.79904	0.999985	0.27822	41.8129
GOTERM_BP_DIRECT	GO:0071108~protein K48-linked deubiquitination	3	1.13636	0.0409869	P40818, F5H211, Q8NBR6	227	24	16792	9.2467	1	0.880725	49.5743
GOTERM_BP_DIRECT	GO:0001701~in utero embryonic development	7	2.65152	0.0411059	P10275, P46531, Q6ZT12, P10070, Q9HCD6, Q4VCS5, Q9P2D1	227	187	16792	2.76906	1	0.871734	49.6766
UP_KEYWORDS	Guanine-nucleotide releasing factor	6	2.27273	0.0426968	A0A1C7CYZ0, Q96PE2, A8MVX0, O75064, Q9Y4G8, Q12967	264	149	20581	3.13926	0.999992	0.284924	43.6388
GOTERM_BP_DIRECT	GO:0006366~transcription from RNA polymerase II promoter	13	4.92424	0.0449811	Q8IVW6, Q9NR55, Q9UM63, P10070, O75909, P78424, Q9UJQ4, Q8IZQ8, Q13950, P04150, P10244, Q15714, Q9P0K8	227	513	16792	1.87457	1	0.885977	52.9025
UP_KEYWORDS	Calmodulin-binding	6	2.27273	0.0458365	A0A0A0MQW9, Q8IZT6, P27987, A0A0A0MTS7, Q4G0U5, O95613, Q9UGI6	264	152	20581	3.0773	0.999997	0.295733	46.0201
GOTERM_BP_DIRECT	GO:0050679~positive regulation of epithelial cell proliferation	4	1.51515	0.0470226	P46531, P22004, P56179, Q92570	227	60	16792	4.93157	1	0.888525	54.5229
GOTERM_CC_DIRECT	GO:0016607~nuclear speck	7	2.65152	0.0495575	Q9H0G5, Q8IZL2, P10070, Q9H307, Q96JK9, O15047, Q9P0U4	240	201	18224	2.64444	0.999999	0.662749	48.8965
GOTERM_BP_DIRECT	GO:0016032~viral process	9	3.40909	0.0497269	O15504, Q01826, O75179, Q6VY07, A8CG34, Q13137, Q7Z3B4, O60885, Q93009	227	299	16792	2.22663	1	0.894174	56.5888
GOTERM_MF_DIRECT	GO:0046966~thyroid hormone receptor binding	3	1.13636	0.0507025	Q14686, Q9Y6Q9, Q93074	228	27	16881	8.22661	1	0.468856	50.1785
GOTERM_CC_DIRECT	GO:0000794~condensed nuclear chromosome	3	1.13636	0.051783	A0A0A0MTS7, P38398, O60885	240	28	18224	8.13571	1	0.652101	50.4546
UP_KEYWORDS	Mitosis	8	3.0303	0.0519305	Q08J23, Q8IZT6, A0A0X1KG68, P04150, Q9UPV0, O75909, P49454, O60566	264	262	20581	2.38041	0.999999	0.321388	50.3789
UP_KEYWORDS	Zinc	40	15.1515	0.0524562	O15504, Q9UGU0, P47974, O15409, Q12830, O76083, A0A1W2PQJ7, P10275, Q6ZT12, P07902, P38398, O75592, Q8IXK0, Q15637, Q6ZWE6, Q9UM63, Q9H1B7, P10070, Q9ULU4, Q9H160, Q96P47, O43255, Q8TC41, Q9UJQ4, Q9NQV7, Q8IYL2, Q96DT7, O14686, P04150, Q9UNA0, O95785, Q86XK2, Q76LX8, Q96JP5, Q8N3F8, Q02447, Q92570, Q96T25, Q8NB15, Q9P0U4	264	2348	20581	1.32808	0.999999	0.317115	50.7392
GOTERM_BP_DIRECT	GO:0060742~epithelial cell differentiation involved in prostate gland development	2	0.757576	0.0527627	P10275, C9JIZ6	227	4	16792	36.9868	1	0.900725	58.8027
GOTERM_BP_DIRECT	GO:0006303~double-strand break repair via nonhomologous end joining	4	1.51515	0.0530155	P38398, Q12888, Q6ZW49, Q9H9Q4	227	63	16792	4.69673	1	0.894463	58.9823
GOTERM_CC_DIRECT	GO:0000151~ubiquitin ligase complex	5	1.89394	0.0538477	Q6ZT12, P38398, Q86XK2, Q8TC41, Q93074	240	108	18224	3.51543	1	0.641509	51.8607
GOTERM_BP_DIRECT	GO:0048477~oogenesis	3	1.13636	0.0542139	Q8IZT6, O14686, Q9NZ56	227	28	16792	7.92574	1	0.892605	59.8233
UP_KEYWORDS	Metal-binding	58	21.9697	0.0548752	Q12830, F8W9J4, Q9NZB8, A0A1W2PQJ7, Q6ZT12, O00408, O75592, P13942, Q9UM63, Q9H1B7, A0A0A0MTS7, O60346, Q9ULU4, Q76MJ5, Q9H160, Q9UJQ4, Q8TC41, Q8IYL2, O14686, O95785, A0A1C7CYY9, Q76LX8, Q86XK2, Q02447, Q92570, Q8NB15, Q5THR3, Q9UGU0, O15504, A0A0X1KG68, P47974, O15409, O76083, Q86X52, P10275, P46531, P07902, P38398, Q15637, Q8IXK0, Q6ZWE6, Q8WUY3, Q9H0K1, P10070, A8K979, Q96P47, O43255, O76074,…	264	3640	20581	1.24219	1	0.322455	52.3664
GOTERM_CC_DIRECT	GO:0005856~cytoskeleton	10	3.78788	0.0571726	Q15149, Q9UEW8, E9PGF5, Q07283, Q5JV73, Q8TF72, Q13137, Q9HBL0, P35236, F8W9J4, Q6NYC8	240	371	18224	2.04672	1	0.64045	54.0477
GOTERM_MF_DIRECT	GO:0002039~p53 binding	4	1.51515	0.0614206	P42858, Q12888, O60885, Q93009	228	67	16881	4.42027	1	0.523434	57.2056
GOTERM_CC_DIRECT	GO:0005923~bicellular tight junction	5	1.89394	0.0615784	Q8IY63, Q96QZ7, O95049, Q9Y4G8, Q4VCS5	240	113	18224	3.35988	1	0.646307	56.8043
UP_KEYWORDS	Cell division	10	3.78788	0.0619056	Q08J23, Q8IZT6, A0A0X1KG68, P04150, Q8TDN4, Q9UPV0, O60447, O75909, P49454, O60566	264	388	20581	2.00924	1	0.349334	56.8179
GOTERM_BP_DIRECT	GO:0006974~cellular response to DNA damage stimulus	7	2.65152	0.0625042	P38398, Q12888, Q14686, O75909, Q9NZ56, Q12778, O60885	227	208	16792	2.4895	1	0.918544	65.2127
GOTERM_MF_DIRECT	GO:0003677~DNA binding	31	11.7424	0.0633347	P54253, Q8IVW6, Q9UGU0, A0A0X1KG68, P47974, O15409, P10275, P38398, Q9H307, P55316, Q8IWI9, Q8IXK0, Q00839, A0A1C7CYX1, Q01826, Q9UM63, Q12888, Q9H160, P78424, Q13950, Q9Y261, Q96DT7, O14686, P04150, Q9UNY4, Q9H9Q4, Q9UJV8, Q92570, Q96T25, Q8NB15, Q9P0U4	228	1674	16881	1.3711	1	0.521302	58.3595
GOTERM_BP_DIRECT	GO:0007411~axon guidance	6	2.27273	0.0640937	Q96S59, P10070, O43255, A0A087WWM5, Q92570, P24043	227	159	16792	2.79146	1	0.917922	66.1651
UP_KEYWORDS	mRNA processing	9	3.40909	0.0641076	Q9H0Z9, Q9H0G5, Q9UNY4, Q5T481, Q9H307, Q15637, Q00839, P23246, O43251	264	332	20581	2.11333	1	0.352538	58.131
GOTERM_BP_DIRECT	GO:1990090~cellular response to nerve growth factor stimulus	3	1.13636	0.0649802	Q9Y4G8, Q8N3F8, Q12830	227	31	16792	7.15873	1	0.915026	66.6857
GOTERM_BP_DIRECT	GO:0021942~radial glia guided migration of Purkinje cell	2	0.757576	0.0655144	O14512, O43251	227	5	16792	29.5894	1	0.911005	66.9957
GOTERM_BP_DIRECT	GO:0048752~semicircular canal morphogenesis	2	0.757576	0.0655144	Q92570, Q9P2D1	227	5	16792	29.5894	1	0.911005	66.9957
GOTERM_CC_DIRECT	GO:0048471~perinuclear region of cytoplasm	14	5.30303	0.0671082	Q99700, P10645, Q9BX97, Q9Y3Q4, P54259, Q9Y4G8, Q12830, P49454, O60566, O76083, O95487, O00408, Q9NZ56, Q13137	240	621	18224	1.71186	1	0.657973	60.0479
GOTERM_MF_DIRECT	GO:0003723~RNA binding	13	4.92424	0.0675362	P54253, Q99700, Q8NE35, O75179, Q5T481, P14866, O15047, O43251, Q7Z417, P04150, P38398, Q00839, Q15637	228	547	16881	1.75962	1	0.531953	60.7923
GOTERM_MF_DIRECT	GO:0008094~DNA-dependent ATPase activity	3	1.13636	0.0686122	P51531, Q9UNY4, Q12830	228	32	16881	6.9412	1	0.525318	61.3937
GOTERM_BP_DIRECT	GO:0006409~tRNA export from nucleus	3	1.13636	0.0687156	O15504, A8CG34, Q7Z3B4	227	32	16792	6.93502	1	0.915821	68.7974
GOTERM_CC_DIRECT	GO:0030018~Z disc	5	1.89394	0.0698633	A0A0A0MTS7, Q8WX93, Q8WXH0, Q9UMS6, F8W9J4	240	118	18224	3.21751	1	0.653431	61.5785
UP_KEYWORDS	Disease mutation	42	15.9091	0.071275	P51531, Q6VY07, Q5T481, O15409, A0A087WWM5, O60566, Q9NZB8, Q93074, Q86X52, P10275, P46531, C9JIZ6, P07902, P42858, P38398, Q8WXH0, P55316, Q86Y38, Q8NEZ2, P13942, O15265, P56645, Q9P2D1, Q08J23, Q8IZT6, A0A0A0MTS7, P10070, Q9Y3Q4, P78424, Q9UJQ4, Q13950, A0A0C4DG24, P24043, Q15149, O14686, P04150, Q76LX8, A0A1C7CYY9, O60741, Q9UPV0, Q9H9Q4, O60313	264	2550	20581	1.28402	1	0.377234	62.1541
GOTERM_BP_DIRECT	GO:0010827~regulation of glucose transport	3	1.13636	0.0725199	O15504, A8CG34, Q7Z3B4	227	33	16792	6.72487	1	0.921918	70.8186
UP_KEYWORDS	Chromosome	10	3.78788	0.0728954	P38398, Q12888, Q86XK2, A0A1B0GU45, P49454, O60885, O60566, Q9NQV7, O15047, O15446	264	400	20581	1.94896	1	0.377179	63.0127
GOTERM_BP_DIRECT	GO:0008380~RNA splicing	6	2.27273	0.0739838	Q9H0Z9, Q9H0G5, Q9UNY4, Q5T481, P23246, O43251	227	166	16792	2.67374	1	0.921009	71.563
GOTERM_CC_DIRECT	GO:1990124~messenger ribonucleoprotein complex	2	0.757576	0.0761623	Q8NE35, Q7Z5Q1	240	6	18224	25.3111	1	0.667509	64.8766
GOTERM_CC_DIRECT	GO:0016592~mediator complex	3	1.13636	0.0768372	Q96RN5, Q86YW9, Q93074	240	35	18224	6.50857	1	0.652983	65.214
UP_KEYWORDS	cAMP	3	1.13636	0.0771768	O00408, Q9Y3Q4, O60741	264	36	20581	6.49653	1	0.388006	65.1954
GOTERM_BP_DIRECT	GO:0042048~olfactory behavior	2	0.757576	0.0780952	Q6ZT12, Q9P2D1	227	6	16792	24.6579	1	0.927188	73.5596
GOTERM_BP_DIRECT	GO:0007417~central nervous system development	5	1.89394	0.0788912	P54259, P78424, Q9H9Q4, A0A087WWM5, Q9P2D1	227	120	16792	3.08223	1	0.924579	73.9306
GOTERM_CC_DIRECT	GO:0010494~cytoplasmic stress granule	3	1.13636	0.0806768	Q99700, Q7Z417, Q92615	240	36	18224	6.32778	1	0.654561	67.0771
GOTERM_MF_DIRECT	GO:0000981~RNA polymerase II transcription factor activity, sequence-specific DNA binding	6	2.27273	0.0813328	P55316, O15409, Q02447, Q13950, Q12778, Q9Y261	228	171	16881	2.59788	1	0.576679	67.8864
GOTERM_MF_DIRECT	GO:0003779~actin binding	8	3.0303	0.0820875	Q15149, E9PGF5, Q8WX93, Q8WXH0, Q9NZ56, Q9UMS6, Q9HBL0, F8W9J4, Q6NYC8	228	278	16881	2.13063	1	0.56827	68.2379
UP_KEYWORDS	DNA repair	8	3.0303	0.0829248	P38398, Q12888, Q9UPV0, Q6ZW49, Q9H9Q4, P23246, Q8IY92, Q93009	264	293	20581	2.12856	1	0.403974	67.9388
UP_KEYWORDS	DNA recombination	4	1.51515	0.0853133	P38398, Q6ZW49, P23246, Q8IY92	264	81	20581	3.84979	1	0.406354	69.0189
GOTERM_BP_DIRECT	GO:0001843~neural tube closure	4	1.51515	0.085426	O95487, Q8TF72, Q9UJQ4, Q93074	227	77	16792	3.84278	1	0.935641	76.797
UP_KEYWORDS	Pseudohermaphroditism	2	0.757576	0.0861064	P10275, P04150	264	7	20581	22.2738	1	0.402703	69.37
GOTERM_CC_DIRECT	GO:0005930~axoneme	4	1.51515	0.0879394	P10070, Q4G0U5, P49454, Q9C0B2	240	80	18224	3.79667	1	0.671294	70.3514
GOTERM_CC_DIRECT	GO:0042788~polysomal ribosome	2	0.757576	0.0882821	Q7Z417, Q92615	240	7	18224	21.6952	1	0.657192	70.4982
GOTERM_CC_DIRECT	GO:0045120~pronucleus	2	0.757576	0.0882821	P14866, P49454	240	7	18224	21.6952	1	0.657192	70.4982
GOTERM_BP_DIRECT	GO:0048813~dendrite morphogenesis	3	1.13636	0.0883772	A0A1C7CYY9, O94991, O43251	227	37	16792	5.99786	1	0.937836	77.992
GOTERM_CC_DIRECT	GO:0005829~cytosol	53	20.0758	0.0898396	Q9UEW8, Q96NL6, O60447, Q12778, F8W9J4, Q9NZB8, Q4VCS5, P27987, O00408, Q9NZ56, A0A1C7CYZ0, Q8IY63, Q96S59, A0A0A0MTS7, O60346, Q8TC41, O94988, P49454, Q93009, P40818, Q15149, Q7Z7E8, O95613, O15504, Q9H0Z9, Q96PE2, Q6VY07, P47974, Q9Y4G8, O60566, O76083, P10275, P46531, F5H211, P07902, Q5VT97, P42858, Q12967, Q8NDV7, P10070, Q92615, Q8TDN4, P06727, O43255, P35236, O76074, Q8IZD4, O95487, Q96FQ6,…	240	3315	18224	1.21402	1	0.648932	71.157
UP_KEYWORDS	Mental retardation	8	3.0303	0.0901445	P51531, Q08J23, Q8IZT6, O14686, Q6VY07, P55316, Q9NZ56, Q93074	264	299	20581	2.08584	1	0.411055	71.1016
GOTERM_MF_DIRECT	GO:0034046~poly(G) binding	2	0.757576	0.0904316	P54253, Q00839	228	7	16881	21.1541	1	0.593617	71.8936
GOTERM_BP_DIRECT	GO:0035726~common myeloid progenitor cell proliferation	2	0.757576	0.0905073	P27987, Q92570	227	7	16792	21.1353	1	0.938266	78.8184
GOTERM_BP_DIRECT	GO:0042297~vocal learning	2	0.757576	0.0905073	P42858, O15409	227	7	16792	21.1353	1	0.938266	78.8184
GOTERM_BP_DIRECT	GO:2000766~negative regulation of cytoplasmic translation	2	0.757576	0.0905073	Q8NE35, Q7Z5Q1	227	7	16792	21.1353	1	0.938266	78.8184
GOTERM_BP_DIRECT	GO:0060982~coronary artery morphogenesis	2	0.757576	0.0905073	O95487, P46531	227	7	16792	21.1353	1	0.938266	78.8184
GOTERM_BP_DIRECT	GO:0060740~prostate gland epithelium morphogenesis	2	0.757576	0.0905073	P10275, P46531	227	7	16792	21.1353	1	0.938266	78.8184
GOTERM_BP_DIRECT	GO:0030522~intracellular receptor signaling pathway	3	1.13636	0.0924897	P10275, Q92570, Q9Y6Q9	227	38	16792	5.84002	1	0.938396	79.5612
GOTERM_BP_DIRECT	GO:0000381~regulation of alternative mRNA splicing, via spliceosome	3	1.13636	0.0924897	Q9H0G5, P14866, O43251	227	38	16792	5.84002	1	0.938396	79.5612
GOTERM_BP_DIRECT	GO:2001237~negative regulation of extrinsic apoptotic signaling pathway	3	1.13636	0.0924897	P10275, P42858, O43255	227	38	16792	5.84002	1	0.938396	79.5612
UP_KEYWORDS	Cell junction	14	5.30303	0.0925459	Q8IY63, E9PGF5, Q8NE35, Q8WX93, P54259, Q96QZ7, Q8TF72, O95049, Q9Y4G8, F8W9J4, Q4VCS5, Q15149, Q8WXH0, Q9H307, Q9HBL0	264	675	20581	1.61691	1	0.413233	72.0879
GOTERM_MF_DIRECT	GO:0004843~thiol-dependent ubiquitin-specific protease activity	4	1.51515	0.0930715	P40818, F5H211, Q8NBR6, Q93009	228	80	16881	3.70197	1	0.593409	72.9665
GOTERM_MF_DIRECT	GO:0018024~histone-lysine N-methyltransferase activity	3	1.13636	0.0965161	O14686, Q9NQV7, O15047	228	39	16881	5.69534	1	0.596469	74.3094
GOTERM_BP_DIRECT	GO:0002062~chondrocyte differentiation	3	1.13636	0.0966569	P10070, P13942, Q13950	227	39	16792	5.69027	1	0.942564	81.0436
GOTERM_MF_DIRECT	GO:0003700~transcription factor activity, sequence-specific DNA binding	19	7.19697	0.0974481	Q9UGU0, Q9NR55, Q9UM63, P10070, P47974, O15409, P78424, Q9UJQ4, Q13950, Q9Y261, A0A1W2PQJ7, P10275, P46531, P04150, P10244, P56179, Q8IWI9, Q15714, A0A1C7CYX1	228	961	16881	1.46384	1	0.589565	74.662
UP_KEYWORDS	Tight junction	4	1.51515	0.0978202	Q8IY63, Q96QZ7, O95049, Q4VCS5	264	86	20581	3.62597	1	0.425253	74.1461
GOTERM_BP_DIRECT	GO:0030036~actin cytoskeleton organization	5	1.89394	0.0986741	A0A1C7CYZ0, F5H211, Q96PE2, Q8WX93, Q4VCS5	227	130	16792	2.84514	1	0.942679	81.7244
GOTERM_BP_DIRECT	GO:0006511~ubiquitin-dependent protein catabolic process	6	2.27273	0.0995863	P40818, Q6ZT12, F5H211, Q86XK2, O43255, Q93009	227	182	16792	2.43869	1	0.940872	82.0247

## Sheet: Hsa-Cat3
Category	Term	Count	%	PValue	Genes	List Total	Pop Hits	Pop Total	Fold Enrichment	Bonferroni	Benjamini	FDR
UP_KEYWORDS	Polymorphism	392	80.3279	2.93985e-25	Q9ULG6, Q5JTV8, O15213, O95976, Q8NHS9, Q8TC71, Q8NI51, Q96QP1, Q4U2R8, O75695, Q96PP9, A0A0A0MRA8, Q13751, Q5JU67, E7EV90, P46934, Q86YC2, Q8NAT2, Q8N9S9, O15230, B0QYK5, P47902, Q9P2E2, Q96PQ0, Q8IZF2, G3V140, Q8IWJ2, Q92805, Q6UWZ7, Q8IYK2, Q8NFU7, Q9H8L6, Q49A88, B1AKI9, O95644, Q8NCR9, A4D0V7, Q8N9T8, A8MPX8, J3KQ26, Q9Y6H3, Q6ZSB9, Q9NXX6, Q9NP70, Q4ZHG4, Q96Q06, Q13438, Q96B21, Q5JSP0, Q9B…	488	12043	20581	1.37277	9.55452e-23	9.55452e-23	3.97646e-22
UP_KEYWORDS	Coiled coil	148	30.3279	7.87763e-19	Q6ZUS5, A0A0A6YYI3, Q9ULG6, Q5JTV8, Q6ZW49, Q9H3S7, P35247, Q6ZU64, Q14142, Q96HJ3, Q8TC71, O75146, O14513, P17861, Q96PP9, Q7Z591, P98161, A0A0A0MRA8, Q9ULL8, Q9NX58, Q96DN5, Q13751, Q5JU67, Q9Y3X0, Q8IYB5, E9PMT2, Q8WUQ7, P78424, Q7Z7A1, Q6PK04, Q9HC07, Q8N998, Q99871, Q86YC2, Q502W7, Q15149, O15230, A8K8P3, Q7RTX7, Q9P0W8, Q9P2E2, Q96KN7, E7EUR8, Q92887, Q8IWJ2, G3V140, O95810, Q9UPP2, Q92805,…	488	3036	20581	2.05592	2.56023e-16	1.28011e-16	1.06553e-15
UP_KEYWORDS	Cilium	20	4.09836	5.2706e-07	P56715, A0A087WTU9, Q9UL16, O75665, A8MTZ0, Q4G0X9, Q5JU67, P10071, Q9H3S7, A6NGG8, Q6ZU64, Q9C0B2, Q5TD94, P57679, P08F94, O75695, Q7RTX7, P98161, Q8N841, Q96KN7	488	207	20581	4.0748	0.00017128	5.70966e-05	0.000712901
UP_KEYWORDS	Alternative splicing	304	62.2951	8.0693e-07	Q9NQW1, Q9ULG6, A0A0A6YYI3, Q5JTV8, O95264, P50607, Q6ZU64, Q8NHS9, Q9BUT9, Q96HJ3, Q8TC71, Q8NI51, Q9BRF8, Q8NFF2, Q4U2R8, Q96QP1, P49790, Q7Z591, Q9C0F0, P98161, Q9UIL8, Q86XR2, A0A0A0MRA8, O43379, Q9ULL8, Q96DN5, Q5JU67, E7EV90, P46934, P78424, E9PMT2, Q92667, Q9HC07, O15228, Q96P26, Q99871, Q02078, Q8N9S9, Q8NAT2, O15230, B0QYK5, A8K8P3, P47902, Q9P2E2, P49593, Q8IZF2, P20963, Q8IWJ2, G3V140,…	488	10587	20581	1.21101	0.000262218	6.55609e-05	0.00109145
GOTERM_CC_DIRECT	GO:0005813~centrosome	28	5.7377	3.85853e-06	Q14999, G3V140, Q8IWC1, Q5VT06, A0A087WUH9, Q49A88, P08F94, Q6ZN84, Q13426, A8MST6, Q9P2G4, A0A087WTU9, O43379, O75665, Q96DN5, Q99996, Q0P6D6, Q7Z7A1, Q96RT7, E9PKB1, P49454, Q99871, Q502W7, Q9BVA0, A8K8P3, Q13416, P51587, Q8WXU2, Q9P2H0	433	426	18224	2.76633	0.00139582	0.00139582	0.00530354
UP_KEYWORDS	Ciliopathy	14	2.86885	9.32856e-06	A0A087WTU9, O75665, A8MTZ0, Q4G0X9, A6NGG8, P49454, Q8N427, Q5TD94, P57679, Q9H799, P08F94, Q8WXU2, P98161, Q96KN7	488	126	20581	4.68602	0.0030272	0.000606175	0.0126171
UP_KEYWORDS	Cell projection	34	6.96721	0.000252429	P56715, Q9UL16, A8MTZ0, Q8N350, Q9H3S7, Q6ZU64, Q9H799, A0A087WUH9, P08F94, O75695, P38935, O94763, P98161, Q8N841, A0A087WTU9, Q4G0X9, O75665, Q5JU67, P10071, Q96MT7, A6NGG8, Q96M96, Q6UVK1, Q8NDM7, Q5TD94, Q9C0B2, P57679, Q92508, Q7RTX7, Q9P0W8, O60469, Q9P2H0, Q9P2E2, Q96KN7	488	721	20581	1.9888	0.0787739	0.0135819	0.340897
UP_KEYWORDS	Phosphoprotein	234	47.9508	0.000258445	A0A0A6YYI3, Q9ULG6, Q5JTV8, O15213, Q8TC71, Q96HJ3, Q9BUT9, Q9BRF8, P49790, Q7Z591, P98161, A0A0A0MRA8, O43379, Q9ULL8, Q9NX58, Q9C0D6, E7EV90, E9PMT2, P46934, Q92667, O15228, Q6UVK1, Q99871, Q86YC2, Q02078, Q99676, Q8NAT2, P49593, Q8IZF2, P20963, G3V140, Q8IWJ2, Q92805, Q6UWZ7, F8VXC8, Q8IYK2, Q8NFU7, Q49A88, Q9NWA0, O95644, Q9BQG0, Q8N9T8, Q9BW85, J3KQ26, P43699, Q99996, P10071, P35716, Q3B726,…	488	8246	20581	1.19679	0.0805738	0.0119291	0.349009
GOTERM_CC_DIRECT	GO:0036064~ciliary basal body	10	2.04918	0.000531318	A0A087WTU9, O75665, P08F94, O75695, Q9H3S7, Q9P0W8, P49454, Q9P2E2, P57679, Q8N841	433	98	18224	4.29467	0.175014	0.0917124	0.727846
GOTERM_MF_DIRECT	GO:0008017~microtubule binding	15	3.07377	0.000578998	P56715, G3V140, Q8IWC1, Q96MT7, Q658L1, Q5VT06, Q96RT7, O15527, Q9P2P6, Q8N427, Q9BVA0, Q86Y91, Q9BW19, Q9P2E2, Q9P2G4	411	208	16881	2.96199	0.258329	0.258329	0.834217
GOTERM_CC_DIRECT	GO:0005930~axoneme	9	1.84426	0.000609726	P56715, Q4G0X9, P10071, Q9P0W8, P49454, Q9P2E2, Q9C0B2, Q5TD94, Q96KN7	433	80	18224	4.73487	0.198114	0.0709531	0.83484
UP_KEYWORDS	DNA repair	18	3.68852	0.00065548	Q9NUS5, P54278, Q96HA7, O15287, Q6ZW49, P43351, O15527, Q6UWZ7, Q9NXX6, Q86YC2, O15360, Q8IYD8, Q13426, P18887, Q9NW38, P51587, Q96AY2, Q2YD98	488	293	20581	2.59091	0.191925	0.0262859	0.882973
GOTERM_CC_DIRECT	GO:0005578~proteinaceous extracellular matrix	17	3.48361	0.000697174	Q9Y6N6, P12111, O95428, Q9UBB9, Q9UKP4, O94769, Q6XPR3, Q9UHI8, P35247, Q9NP70, B0QYK5, P58397, O00585, Q6UX39, Q05996, O95389, Q6NUI6	433	268	18224	2.66975	0.223117	0.0611657	0.954042
UP_KEYWORDS	Fanconi anemia	5	1.02459	0.000904853	O15287, O15360, P51587, Q9NW38, Q86YC2	488	19	20581	11.0985	0.25488	0.0321615	1.21699
UP_KEYWORDS	Cytoskeleton	45	9.22131	0.000956072	Q14999, P56715, Q02833, Q8IWC1, G3V140, Q5VT06, Q9H3S7, A0A087WUH9, Q49A88, P08F94, Q6ZN84, A8MST6, Q86Y91, Q9P2G4, A0A0A0MRA8, Q8N841, A0A087WTU9, O43379, Q9ULL8, O75665, Q99996, Q8IZT6, Q96RT7, Q7Z7A1, Q96M96, P49454, Q9P2P6, Q99871, Q5TD94, Q9C0B2, P57679, Q502W7, Q9BVA0, Q15149, C9IZC6, Q6XZF7, A8K8P3, Q8IYE0, Q5JSP0, Q9BW19, P51587, Q9P0W8, Q9P2E2, Q9P2H0, Q9BTC0	488	1138	20581	1.6677	0.267192	0.030609	1.28547
UP_KEYWORDS	Extracellular matrix	16	3.27869	0.00130641	Q13751, Q9Y6N6, P12111, Q9UKP4, O94769, Q6XPR3, Q9UHI8, P35247, Q9NP70, Q9H8L6, O15230, B0QYK5, P58397, Q6UY14, Q05996, Q6NUI6	488	258	20581	2.61545	0.346138	0.0378872	1.75266
GOTERM_BP_DIRECT	GO:0006874~cellular calcium ion homeostasis	9	1.84426	0.00155893	Q8NFF2, Q8NHX9, P08F94, P41180, P23276, Q9HC07, P07686, P21917, P21918	396	93	16792	4.10362	0.941269	0.941269	2.61747
GOTERM_MF_DIRECT	GO:0004222~metalloendopeptidase activity	10	2.04918	0.00173913	O95428, Q9UKP4, Q9Y6H3, P58397, P23276, Q9UHI8, Q6UY14, Q9UQC9, Q9Y6L7, Q9H013	411	113	16881	3.63478	0.592686	0.361788	2.48626
UP_KEYWORDS	Zymogen	14	2.86885	0.00182669	P36269, P09848, Q9Y5Q5, P00751, P16519, P58397, Q9UKP4, Q9UHI8, O60235, P07686, Q9Y6L7, J3KPJ0, Q9BQR3, Q9H013	488	214	20581	2.75906	0.448006	0.0483122	2.44272
UP_KEYWORDS	DNA recombination	8	1.63934	0.00306385	Q7Z4M0, Q13426, Q6ZW49, P51587, P43351, Q96AY2, Q9NXX6, Q86YC2	488	81	20581	4.16535	0.631118	0.073845	4.06557
GOTERM_CC_DIRECT	GO:0005929~cilium	11	2.2541	0.00325719	Q9UL16, Q4G0X9, O75665, P10071, Q5JU67, P08F94, P50607, A6NGG8, P98161, Q9P2E2, P57679	433	151	18224	3.066	0.693037	0.210382	4.38536
UP_KEYWORDS	Disease mutation	82	16.8033	0.00335723	Q14999, P31785, Q8TBZ6, P41180, P07686, P31213, Q6XR72, Q8NFF2, O15360, Q9HAZ2, O75695, P34059, Q13426, P38935, P98161, O43379, Q15466, Q9ULL8, O75665, Q8IZT6, H9KVB3, Q13751, P12111, Q9Y6N6, Q7Z6J9, P78424, Q9HC07, Q96M96, O15228, O43526, P50336, Q02078, Q15149, Q502W6, Q96MS0, P03971, Q9NW13, Q96KN7, P56715, P54278, Q92887, O15287, Q9UM01, A0A0A0MTR7, Q14692, Q6UWZ7, Q96CV9, P22309, Q9H799, P00…	488	2550	20581	1.35619	0.664769	0.0750974	4.44674
GOTERM_CC_DIRECT	GO:0005730~nucleolus	34	6.96721	0.00440957	O15287, Q15572, Q9H6F5, A0A0A6YYI3, Q9UBB9, Q8TBZ6, O15213, Q14146, A0A0A0MTR7, Q14692, O15381, P49790, Q9BQG0, Q9P275, Q8N9T8, Q76FK4, Q9NX58, Q8WXF8, Q7Z6J9, Q8IY81, Q3B726, Q9BYG3, Q6PK04, Q5TD94, Q99871, J3KTH2, Q9H875, P04818, P46013, Q15646, Q9GZR7, Q96AY2, Q9NW13, P29590	433	857	18224	1.66976	0.798062	0.234045	5.89368
UP_KEYWORDS	DNA damage	18	3.68852	0.00451625	Q9NUS5, P54278, Q96HA7, O15287, Q6ZW49, P43351, O15527, Q6UWZ7, Q9NXX6, Q86YC2, O15360, Q8IYD8, Q13426, P18887, Q9NW38, P51587, Q96AY2, Q2YD98	488	352	20581	2.15663	0.770328	0.0934178	5.93886
GOTERM_CC_DIRECT	GO:0043240~Fanconi anaemia nuclear complex	4	0.819672	0.00486784	O15287, O15360, Q8IYD8, Q9NW38	433	15	18224	11.2234	0.829063	0.223028	6.48734
GOTERM_BP_DIRECT	GO:0000086~G2/M transition of mitotic cell cycle	10	2.04918	0.00513323	A0A087WTU9, P48681, Q99996, O75665, A8K8P3, A8MST6, O75330, Q7Z7A1, Q99871, Q96CV9	396	137	16792	3.09519	0.999913	0.99068	8.37742
UP_KEYWORDS	Primary ciliary dyskinesia	5	1.02459	0.00658849	Q4G0X9, Q8WXU2, P49454, Q5TD94, Q8N427	488	32	20581	6.58972	0.883323	0.125647	8.55304
GOTERM_BP_DIRECT	GO:0010923~negative regulation of phosphatase activity	6	1.22951	0.00679046	Q9H788, Q6ZMY3, A8K8P3, Q9BYG3, O75864, O94763	396	51	16792	4.98871	0.999996	0.983865	10.9378
GOTERM_BP_DIRECT	GO:0032331~negative regulation of chondrocyte differentiation	4	0.819672	0.00687333	Q9UKP4, P58397, P48436, Q6NUI6	396	17	16792	9.97742	0.999996	0.956413	11.064
GOTERM_BP_DIRECT	GO:0035082~axoneme assembly	4	0.819672	0.00687333	P56715, Q6NUN7, Q9C0B2, Q5TD94	396	17	16792	9.97742	0.999996	0.956413	11.064
GOTERM_CC_DIRECT	GO:0005737~cytoplasm	148	30.3279	0.00790289	Q14999, Q9NWZ3, A0A0C4DH17, Q9NY43, Q9H3S7, P50607, Q96A49, Q14142, Q8TC71, Q9BUT9, D6REX3, O75146, Q8NI51, Q9BRF8, O15027, Q96QP1, Q8NFF2, B5MC67, P17861, O75695, P49790, Q9BW04, P38935, P98161, A0A0A0MRA8, Q15466, Q9ULL8, P35869, Q8IYB5, E9PMT2, Q8WUQ7, P46934, Q7Z7A1, Q96P26, Q8N998, Q99871, Q502W7, Q9Y239, Q02078, Q15149, Q502W6, O15018, Q9BUK6, Q9P0W8, Q8WYP3, Q05932, P56715, P20963, P54278,…	433	5222	18224	1.19284	0.943426	0.301644	10.3323
UP_KEYWORDS	Hydrolase	56	11.4754	0.00801227	Q9UKP4, Q9H3S7, P07686, O15527, Q9BRF8, P34059, Q96PP9, Q68CJ6, Q8IYD8, Q6DHV7, Q9P275, P38935, Q9BQR3, Q9H013, Q9NVH0, Q00722, Q9NPH0, Q9BTY2, Q9UHI8, Q96P26, Q70CQ1, Q5VYY2, Q9UNY4, P42694, P49593, P54278, O60423, P36269, P0C025, P16519, Q9Y3R4, A0A0A0MTR7, O60235, J3KPJ0, Q96FZ2, P00751, Q68J44, P58397, Q9Y6V7, P09848, Q9Y6H3, P23276, Q6UWW8, Q9UQC9, Q96C10, P38567, Q9Y5Q5, Q14147, Q8N4P3, P54…	488	1671	20581	1.41338	0.926794	0.14255	10.31
UP_KEYWORDS	Cytoplasm	138	28.2787	0.00818227	Q14999, Q9NQW1, Q9NWZ3, A0A0C4DH17, Q9H3S7, P50607, Q8TC71, Q9BUT9, D6REX3, O75146, Q96M53, Q9BRF8, Q8NI51, Q6QHF9, Q8NFF2, P17861, Q96PP9, Q9BW04, P38935, Q9P2G4, Q9P2G3, A0A0A0MRA8, O43379, Q15466, Q9ULL8, P35869, P46934, Q7Z7A1, Q96P26, Q99871, Q8N998, Q502W7, Q9Y239, Q15149, Q8NAT2, Q502W6, A8K8P3, O15018, Q9P0W8, Q9P2E2, Q8WYP3, Q05932, P56715, O15287, G3V140, Q8IWJ2, O95810, Q9UPP2, P29728,…	488	4816	20581	1.20848	0.93076	0.137865	10.5177
GOTERM_BP_DIRECT	GO:0016337~single organismal cell-cell adhesion	8	1.63934	0.00980692	Q15223, P13598, P08F94, P01040, P06729, P48436, E9PMT2, P98161	396	101	16792	3.35874	1	0.972164	15.4262
GOTERM_MF_DIRECT	GO:0044822~poly(A) RNA binding	41	8.40164	0.0105338	O95628, Q9H6F5, A0A0A6YYI3, Q8TBZ6, Q9HC36, O15213, Q6ZU64, Q9H5Q4, Q14692, O15381, Q8NEZ4, Q53R41, Q9BQG0, Q9P275, Q8N9T8, P78332, Q76FK4, P28799, Q9Y6V7, Q9NX58, Q9Y3X0, Q8IY81, Q8WUQ7, Q9BYG3, Q92667, Q6PK04, Q9BYC8, Q13084, Q14147, Q15149, Q02040, P42694, Q9HCD5, P46013, Q15646, Q9GZR7, Q9NW13, Q9Y3D9, O00411, Q9BTC0, Q9BYN8	411	1129	16881	1.49158	0.995765	0.838205	14.2017
GOTERM_BP_DIRECT	GO:1903546~protein localization to photoreceptor outer segment	3	0.614754	0.010718	P50607, A6NGG8, Q9P0W8	396	7	16792	18.1732	1	0.961738	16.7395
GOTERM_BP_DIRECT	GO:0051593~response to folic acid	3	0.614754	0.010718	P04818, P50553, O15527	396	7	16792	18.1732	1	0.961738	16.7395
GOTERM_BP_DIRECT	GO:0060041~retina development in camera-type eye	6	1.22951	0.0115964	P56715, Q15223, Q9Y6N6, P48436, P50607, Q96KN7	396	58	16792	4.38662	1	0.951572	17.9873
UP_KEYWORDS	Glycosidase	7	1.43443	0.0131302	P09848, P54802, Q9Y3R4, Q9BTY2, P07686, O15527, P38567	488	82	20581	3.60023	0.986371	0.202348	16.3707
GOTERM_BP_DIRECT	GO:0001822~kidney development	7	1.43443	0.015833	Q9H799, P08F94, P35716, Q6N021, Q9UHI8, P98161, P49454	396	86	16792	3.45149	1	0.973347	23.763
GOTERM_BP_DIRECT	GO:0034765~regulation of ion transmembrane transport	8	1.63934	0.0158972	Q8TDN2, Q8TDN1, O95180, Q8NHX9, Q7RTX7, P46934, O43526, Q9ULQ1	396	111	16792	3.05615	1	0.96065	23.8475
UP_KEYWORDS	Neurogenesis	13	2.66393	0.0163083	O43379, P35716, P46934, F8VXC8, Q9NQV8, Q02078, P48681, Q96MS0, Q92858, Q8WXU2, O60469, P50553, Q96T25	488	250	20581	2.19306	0.995223	0.234476	19.9409
UP_KEYWORDS	Methyltransferase	11	2.2541	0.016841	Q8WVE0, Q9BTF0, Q8TBZ6, Q8NEZ4, P04818, Q8IY81, Q9HC36, Q6IPR3, Q9H5Q4, Q9NQV8, P57071	488	193	20581	2.40371	0.995994	0.231146	20.5253
GOTERM_BP_DIRECT	GO:0030198~extracellular matrix organization	11	2.2541	0.0178126	P02671, P13598, Q13751, O15230, Q9Y6N6, P12111, O94769, P20702, P48436, P04004, Q6UY14	396	196	16792	2.37982	1	0.961831	26.3284
GOTERM_BP_DIRECT	GO:0030155~regulation of cell adhesion	5	1.02459	0.0180758	O15230, P48436, E9PMT2, P98161, P29590	396	43	16792	4.9307	1	0.950861	26.6633
GOTERM_CC_DIRECT	GO:0005814~centriole	8	1.63934	0.018078	A0A087WTU9, O43379, A0A087WUH9, O75665, A8K8P3, O75695, Q8IYE0, Q9P2P6	433	113	18224	2.97966	0.998645	0.519914	22.1792
UP_KEYWORDS	Cone-rod dystrophy	4	0.819672	0.0184252	Q8TDN2, A0A087WTU9, Q96JP9, Q96KN7	488	24	20581	7.02903	0.997628	0.240222	22.2401
GOTERM_BP_DIRECT	GO:0007517~muscle organ development	7	1.43443	0.0184667	Q02078, O95180, O15230, P12111, P17861, P49454, P57679	396	89	16792	3.33515	1	0.940531	27.1581
GOTERM_BP_DIRECT	GO:0006302~double-strand break repair	6	1.22951	0.0194437	Q9NVH0, Q13426, P51587, P43351, Q96AY2, Q6UWZ7	396	66	16792	3.85491	1	0.935713	28.381
GOTERM_MF_DIRECT	GO:0043015~gamma-tubulin binding	4	0.819672	0.0197172	O75665, G3V140, P51587, Q96RT7	411	24	16881	6.8455	0.999966	0.923382	25.027
GOTERM_BP_DIRECT	GO:0031214~biomineral tissue development	4	0.819672	0.0202436	Q9UBB9, Q6UX39, A1E959, Q9NP70	396	25	16792	6.78465	1	0.929651	29.3677
GOTERM_BP_DIRECT	GO:0048709~oligodendrocyte differentiation	4	0.819672	0.0202436	P43699, P10071, P48436, P04004	396	25	16792	6.78465	1	0.929651	29.3677
UP_KEYWORDS	Innate immunity	13	2.66393	0.0216826	Q9Y239, P02671, Q9BQ95, P00751, Q9NWZ3, Q9BZW8, Q15646, Q8WUQ7, P35247, P29728, Q96C10, Q8WXG1, P29590	488	261	20581	2.10063	0.999195	0.266373	25.6588
UP_KEYWORDS	Activator	25	5.12295	0.0259338	P43699, Q9BYH8, P35869, P10071, O75469, Q6ZSB9, Q8NFU7, Q02078, Q8NI51, O95644, Q9NWA0, Q9HAZ2, P17861, Q8NEZ4, Q9HCD5, Q92858, Q7Z591, Q7Z5L9, P47902, Q9BQG0, P38935, P50553, Q9HAW0, Q9UIL8, P29590	488	661	20581	1.59509	0.999804	0.299402	29.9114
GOTERM_BP_DIRECT	GO:0046548~retinal rod cell development	3	0.614754	0.0263808	P56715, A0A087WTU9, P54802	396	11	16792	11.5647	1	0.960777	36.524
GOTERM_BP_DIRECT	GO:0019511~peptidyl-proline hydroxylation	3	0.614754	0.0263808	Q8NFU7, Q8N543, Q6N021	396	11	16792	11.5647	1	0.960777	36.524
GOTERM_MF_DIRECT	GO:0008168~methyltransferase activity	7	1.43443	0.0269412	Q9BTF0, Q8TBZ6, Q8NEZ4, Q9HC36, Q6IPR3, Q9NQV8, P57071	411	94	16881	3.05863	0.999999	0.940303	32.6339
GOTERM_BP_DIRECT	GO:0086010~membrane depolarization during action potential	4	0.819672	0.0273857	O95180, Q8NHX9, Q7RTX7, Q9ULQ1	396	28	16792	6.05772	1	0.957292	37.6287
GOTERM_BP_DIRECT	GO:0036297~interstrand cross-link repair	5	1.02459	0.0278284	O15287, O15360, Q8IYD8, Q9NW38, Q96AY2	396	49	16792	4.32694	1	0.951029	38.1096
GOTERM_BP_DIRECT	GO:0000724~double-strand break repair via homologous recombination	6	1.22951	0.0301547	Q9NUS5, Q96HA7, Q9NVH0, P51587, P18887, Q86YC2	396	74	16792	3.43817	1	0.954534	40.5797
GOTERM_BP_DIRECT	GO:0002089~lens morphogenesis in camera-type eye	3	0.614754	0.0311717	Q15223, C9IZC6, P35716	396	12	16792	10.601	1	0.951609	41.6301
GOTERM_BP_DIRECT	GO:0034453~microtubule anchoring	3	0.614754	0.0362757	G3V140, Q8IWJ2, Q5VT06	396	13	16792	9.78555	1	0.965157	46.6432
GOTERM_BP_DIRECT	GO:0006622~protein targeting to lysosome	3	0.614754	0.0362757	Q8IWJ2, P46934, O14964	396	13	16792	9.78555	1	0.965157	46.6432
GOTERM_CC_DIRECT	GO:0072372~primary cilium	6	1.22951	0.0377374	P10071, P08F94, O75695, A6NGG8, P98161, Q9P2E2	433	78	18224	3.23752	0.999999	0.751556	41.0661
UP_KEYWORDS	Biomineralization	4	0.819672	0.0393286	Q9UBB9, Q6UX39, A1E959, Q9NP70	488	32	20581	5.27177	0.999998	0.406428	41.8825
GOTERM_BP_DIRECT	GO:0042475~odontogenesis of dentin-containing tooth	5	1.02459	0.0401935	P10071, O15230, Q6UX39, A1E959, Q9NP70	396	55	16792	3.85491	1	0.971261	50.2133
GOTERM_CC_DIRECT	GO:0043231~intracellular membrane-bounded organelle	21	4.30328	0.044289	P28799, Q99996, Q15572, Q9Y3R4, Q9Y6H3, Q8IUC4, Q9HC07, P29728, Q92805, Q9BSF0, O14964, Q8TC71, D6REX3, Q15223, O75146, Q96Q06, Q9BQG0, O94763, P35658, P25105, Q9BQS8	433	558	18224	1.58395	1	0.774801	46.3484
GOTERM_BP_DIRECT	GO:0045494~photoreceptor cell maintenance	4	0.819672	0.0451521	P56715, P50607, Q9P0W8, Q96JP9	396	34	16792	4.98871	1	0.977984	54.4099
GOTERM_BP_DIRECT	GO:0006310~DNA recombination	6	1.22951	0.0459408	Q7Z4M0, Q13426, Q6ZW49, P43351, P38935, Q9NXX6	396	83	16792	3.06535	1	0.975653	55.0459
GOTERM_BP_DIRECT	GO:0021892~cerebral cortex GABAergic interneuron differentiation	2	0.409836	0.0464942	P43699, P50553	396	2	16792	42.404	1	0.972798	55.4871
GOTERM_BP_DIRECT	GO:0051445~regulation of meiotic cell cycle	2	0.409836	0.0464942	Q8IZT6, Q8NHS9	396	2	16792	42.404	1	0.972798	55.4871
UP_KEYWORDS	Epidermolysis bullosa	3	0.614754	0.0478745	Q15149, Q13751, Q8NEV8	488	15	20581	8.43484	1	0.458402	48.4988
GOTERM_BP_DIRECT	GO:0051216~cartilage development	5	1.02459	0.049915	P04818, P48436, P98161, O43365, P57679	396	59	16792	3.59356	1	0.975802	58.1254
GOTERM_BP_DIRECT	GO:0070125~mitochondrial translational elongation	6	1.22951	0.0500061	Q13084, Q92552, Q8TAE8, Q9BYC8, Q9Y3D9, Q9BYN8	396	85	16792	2.99323	1	0.972265	58.1937
GOTERM_BP_DIRECT	GO:0090307~mitotic spindle assembly	4	0.819672	0.0520754	O75665, Q9BW19, Q96RT7, Q96CA5	396	36	16792	4.71156	1	0.97265	59.7151
GOTERM_BP_DIRECT	GO:0070126~mitochondrial translational termination	6	1.22951	0.0521156	Q13084, Q92552, Q8TAE8, Q9BYC8, Q9Y3D9, Q9BYN8	396	86	16792	2.95842	1	0.968984	59.7441
UP_KEYWORDS	Helicase	8	1.63934	0.0538502	Q9Y6V7, Q14147, Q9UNY4, P42694, Q8IYD8, Q9GZR7, P38935, Q96C10	488	143	20581	2.35939	1	0.486396	52.7031
UP_KEYWORDS	S-adenosyl-L-methionine	9	1.84426	0.0554122	Q8TBZ6, Q8NEZ4, Q8IY81, Q9HC36, Q6IPR3, Q9H5Q4, Q8WXG1, Q9NQV8, P57071	488	174	20581	2.18142	1	0.484018	53.7484
GOTERM_BP_DIRECT	GO:0006461~protein complex assembly	7	1.43443	0.0561995	P02671, Q9UM01, O15360, Q02410, P48436, Q9BYG3, P29590	396	116	16792	2.55886	1	0.973324	62.5932
GOTERM_MF_DIRECT	GO:0034237~protein kinase A regulatory subunit binding	3	0.614754	0.0564228	Q99996, Q92667, Q9BSF0	411	16	16881	7.70119	1	0.993226	56.8306
GOTERM_CC_DIRECT	GO:0032391~photoreceptor connecting cilium	4	0.819672	0.0567819	P56715, Q9P0W8, Q9P2E2, Q96KN7	433	37	18224	4.55003	1	0.828552	55.225
GOTERM_BP_DIRECT	GO:0048704~embryonic skeletal system morphogenesis	4	0.819672	0.0633549	P28356, P10071, P35716, O43365	396	39	16792	4.34913	1	0.981016	67.1329
UP_KEYWORDS	Amelogenesis imperfecta	3	0.614754	0.0666125	Q13751, Q8NFF2, Q9NP70	488	18	20581	7.02903	1	0.538164	60.6398
GOTERM_BP_DIRECT	GO:0010508~positive regulation of autophagy	4	0.819672	0.0673454	A0A087WUH9, P17861, Q6PJ69, Q9ULQ1	396	40	16792	4.2404	1	0.983202	69.434
GOTERM_BP_DIRECT	GO:1902414~protein localization to cell junction	2	0.409836	0.0689263	Q15223, Q96A59	396	3	16792	28.2694	1	0.982667	70.303
GOTERM_BP_DIRECT	GO:0006391~transcription initiation from mitochondrial promoter	2	0.409836	0.0689263	Q9H5Q4, O00411	396	3	16792	28.2694	1	0.982667	70.303
GOTERM_BP_DIRECT	GO:0006211~5-methylcytosine catabolic process	2	0.409836	0.0689263	Q8NFU7, Q6N021	396	3	16792	28.2694	1	0.982667	70.303
GOTERM_CC_DIRECT	GO:0030120~vesicle coat	2	0.409836	0.0694463	D6REX3, Q9NQW1	433	3	18224	28.0585	1	0.865237	62.8173
GOTERM_CC_DIRECT	GO:0005610~laminin-5 complex	2	0.409836	0.0694463	Q13751, O15230	433	3	18224	28.0585	1	0.865237	62.8173
UP_KEYWORDS	Metalloprotease	8	1.63934	0.0698998	Q9UKP4, Q9Y6H3, P58397, P23276, Q9UHI8, Q9UQC9, Q9Y6L7, Q9H013	488	152	20581	2.21969	1	0.543887	62.474
UP_KEYWORDS	Calcium channel	5	1.02459	0.0710146	O95180, Q8NHX9, Q7RTX7, Q9ULQ1, A0A0G2JMR5	488	66	20581	3.19501	1	0.538035	63.0779
GOTERM_MF_DIRECT	GO:0072345~NAADP-sensitive calcium-release channel activity	2	0.409836	0.0711117	Q8NHX9, Q9ULQ1	411	3	16881	27.382	1	0.99565	65.5953
UP_KEYWORDS	WD repeat	12	2.45902	0.0712956	D6REX3, O43379, Q9NQW1, Q9BVA0, Q96DN5, P54198, Q96MT7, O15213, Q8NAA4, Q8NDM7, Q6RI45, Q86YC2	488	281	20581	1.80103	1	0.528202	63.2286
GOTERM_BP_DIRECT	GO:0042384~cilium assembly	7	1.43443	0.0726729	A0A087WTU9, Q9H799, A8MTZ0, O15230, P08F94, Q9P2H0, Q8N427	396	124	16792	2.39378	1	0.984303	72.2704
GOTERM_BP_DIRECT	GO:0022008~neurogenesis	4	0.819672	0.0756593	O43379, Q9HAZ2, P50553, Q9P2E2	396	42	16792	4.03848	1	0.985071	73.7501
GOTERM_BP_DIRECT	GO:0007155~cell adhesion	17	3.48361	0.0763489	Q13751, Q9Y6N6, P12111, P06729, Q9UQC9, P38567, Q9NP70, Q15223, P13598, Q02410, P20702, O15018, Q6UX39, P04004, O60469, O95389, Q9P266	396	459	16792	1.57052	1	0.983805	74.0811
GOTERM_BP_DIRECT	GO:0000042~protein targeting to Golgi	3	0.614754	0.0793957	Q8IWJ2, Q92805, Q96CV9	396	20	16792	6.36061	1	0.98463	75.4969
UP_KEYWORDS	Calcium transport	6	1.22951	0.083107	O95180, Q8NFF2, Q8NHX9, Q7RTX7, Q9ULQ1, A0A0G2JMR5	488	98	20581	2.58209	1	0.574504	69.0742
GOTERM_BP_DIRECT	GO:0006508~proteolysis	18	3.68852	0.083535	Q14999, P36269, P16519, O95428, Q9Y6H3, P23276, Q9UHI8, O60235, Q9UQC9, J3KPJ0, Q96FZ2, Q8N436, P00751, A0A0A0MS08, Q6UY14, Q9Y6L7, J3QT09, Q9BQR3	396	500	16792	1.52655	1	0.986209	77.304
GOTERM_MF_DIRECT	GO:0001158~enhancer sequence-specific DNA binding	3	0.614754	0.08389	P17861, P35716, P48436	411	20	16881	6.16095	1	0.996487	71.8419
GOTERM_BP_DIRECT	GO:0071347~cellular response to interleukin-1	5	1.02459	0.0860309	Q9UKP4, P58397, O00585, P48436, Q8WUQ7	396	71	16792	2.9862	1	0.986451	78.3322
GOTERM_CC_DIRECT	GO:0005788~endoplasmic reticulum lumen	9	1.84426	0.0867111	Q8TAV3, Q13438, P12111, O00584, Q9UKP4, P06727, Q6UWW8, Q6UY14, R4GMU1	433	192	18224	1.97286	1	0.904184	71.256
GOTERM_BP_DIRECT	GO:0046618~drug export	2	0.409836	0.090832	Q96FL8, O75469	396	4	16792	21.202	1	0.988163	80.188
GOTERM_CC_DIRECT	GO:0005958~DNA-dependent protein kinase-DNA ligase 4 complex	2	0.409836	0.0915087	Q9Y6H3, Q13426	433	4	18224	21.0439	1	0.90134	73.2634
GOTERM_MF_DIRECT	GO:0070579~methylcytosine dioxygenase activity	2	0.409836	0.0936763	Q8NFU7, Q6N021	411	4	16881	20.5365	1	0.996444	75.8933
GOTERM_MF_DIRECT	GO:0052634~C-19 gibberellin 2-beta-dioxygenase activity	2	0.409836	0.0936763	Q8NFU7, Q6N021	411	4	16881	20.5365	1	0.996444	75.8933
GOTERM_MF_DIRECT	GO:0018602~2,4-dichlorophenoxyacetate alpha-ketoglutarate dioxygenase activity	2	0.409836	0.0936763	Q8NFU7, Q6N021	411	4	16881	20.5365	1	0.996444	75.8933
GOTERM_MF_DIRECT	GO:0000907~sulfonate dioxygenase activity	2	0.409836	0.0936763	Q8NFU7, Q6N021	411	4	16881	20.5365	1	0.996444	75.8933
GOTERM_MF_DIRECT	GO:0001730~2'-5'-oligoadenylate synthetase activity	2	0.409836	0.0936763	Q15646, P29728	411	4	16881	20.5365	1	0.996444	75.8933
GOTERM_MF_DIRECT	GO:0019798~procollagen-proline dioxygenase activity	2	0.409836	0.0936763	Q8NFU7, Q6N021	411	4	16881	20.5365	1	0.996444	75.8933
GOTERM_MF_DIRECT	GO:0034792~hypophosphite dioxygenase activity	2	0.409836	0.0936763	Q8NFU7, Q6N021	411	4	16881	20.5365	1	0.996444	75.8933
GOTERM_MF_DIRECT	GO:0052635~C-20 gibberellin 2-beta-dioxygenase activity	2	0.409836	0.0936763	Q8NFU7, Q6N021	411	4	16881	20.5365	1	0.996444	75.8933
GOTERM_CC_DIRECT	GO:0031362~anchored component of external side of plasma membrane	3	0.614754	0.0948876	P36269, P08F94, J3KPJ0	433	22	18224	5.73924	1	0.895192	74.5983
GOTERM_CC_DIRECT	GO:0031012~extracellular matrix	12	2.45902	0.0953705	Q9H8L6, P48681, Q8N436, Q15149, O15230, P12111, P01040, P58397, P04004, Q6UY14, Q05996, Q6NUI6	433	296	18224	1.70626	1	0.881673	74.784
GOTERM_MF_DIRECT	GO:0019902~phosphatase binding	4	0.819672	0.0956614	Q9H788, A8K8P3, O75864, Q7Z5V6	411	45	16881	3.65093	1	0.994419	76.6458
GOTERM_BP_DIRECT	GO:0031100~organ regeneration	4	0.819672	0.0982745	P22309, Q05932, Q15466, P46013	396	47	16792	3.60885	1	0.990896	82.7718

## Sheet: Gga-Cat1
Category	Term	Count	%	PValue	Genes	List Total	Pop Hits	Pop Total	Fold Enrichment	Bonferroni	Benjamini	FDR
UP_KEYWORDS	Coiled coil	184	32.7402	2.70598e-35	A0A1D5NWV4, Q90634, Q5ZL19, A0A1D5P1Y1, F1P179, A0A1D5PNE9, E1BVH0, A0A1D5NW24, E1C0V8, E1BWM3, F1NGB1, F1NBT0, P83038, A0A1D5NVQ6, E1BWW3, Q5F454, F1P4P9, E1C6X2, E1BV94, F1NC47, F1P1V3, A0A1D5PFG2, E1C7R9, E1C837, E1BVP1, Q5ZMP2, E1BXP3, R4GH14, A0A1D5PL23, Q76KB2, R4GIU7, E1BQV7, F1P0U3, E1C066, A0A1L1RRB7, A0A1D5NVH3, F1P2F7, E1C063, A0A1D5PYK1, F1NW64, F1NP26, P0CB05, F1N8E4, F1NHY2, E1BS39,…	499	1728	11626	2.48087	4.89782e-33	4.89782e-33	3.33616e-32
GOTERM_CC_DIRECT	GO:0005634~nucleus	122	21.7082	1.38002e-06	A0A1D5NWV4, A0A1D5PEV1, A0A1D5P1Y1, A0A1D5PX69, A0A1L1RVP3, E1C0L6, F1NXG3, A0A1I7Q431, A0A1D5PSE4, E1BWM3, E1BRG3, E1C3T7, E1BV94, F1NDA1, F1NE32, Q04982, E1C833, A0A1D5PL23, R4GIU7, R4GM88, A0A1D5PKJ9, F1P1F3, F1NI11, F1P2F7, A0A1D5PIB1, F1N8E4, E1BS39, F1NUX4, R4GJH4, A0A1D5P778, A0A1L1RX89, R4GI70, A0A1D5NXI5, A0A1D5PCU3, E1C0E8, A0A1L1RPT1, F1NX72, Q4JIM4, A0A1D5P775, A0A1D5PET4, R9PXM9, Q5Z…	431	1905	10057	1.49436	0.000506341	0.000506341	0.00190072
GOTERM_MF_DIRECT	GO:0003677~DNA binding	40	7.11744	3.45855e-06	R9PXM9, Q01795, A0A1D5P1Y1, A0A1D5NTL9, F1NQT0, Q5ZI72, Q5ZJ02, F1NAA2, A0A1D5PNE9, A0A1I7Q431, F1P568, E1BY42, Q9PWE8, E1BWB0, E1BRG3, F1NZ23, A0A1D5NXF5, Q6JLB1, F1NK30, F1NPI7, A0A1D5P2P6, F1NAU5, F1NMU1, F1NE18, A1IIE6, Q5ZJK3, A0A1D5PL23, F1P0U3, F1P1F3, E1C1G7, F1P2F7, A0A1D5PMT9, F1NRP9, E1C5C9, F1N8E4, F1NT94, A0A1D5PEZ2, A0A1D5PYW2, F1NX72, E1C7U9, F1NST0, A0A1D5P775	361	426	8532	2.21919	0.00130303	0.00130303	0.00478232
UP_KEYWORDS	Nucleus	76	13.5231	7.13222e-06	A0A1D5NWV4, A0A1D5P1Y1, A0A1D5NTL9, A0A1D5PEV1, E1BYI1, Q5ZKB9, Q98934, A0A1D5PQK8, E1BVH0, F1NXG3, Q9DEB6, A0A1I7Q431, A0A1D5PSE4, F1NEA7, P83038, Q6JLB1, A0A1D5PVD7, F1NTY0, P10157, Q5ZLP8, F1NH28, Q04982, A0A1D5PK20, A0A1D5PL23, R4GM88, Q5ZIP4, F1P2F7, E1BXW9, A0A1D5P919, A0A1D5NZ24, Q5ZHP7, F1NRP9, A0A1D5PIB1, Q8JHU1, F1NP26, Q5ZKM0, F1N8E4, Q9W689, F1NT94, A0A1D5PCG0, A0A1D5NXI5, A0A1D5PYW2,…	499	1056	11626	1.67679	0.0012901	0.00064526	0.00879287
GOTERM_CC_DIRECT	GO:0005654~nucleoplasm	65	11.5658	8.34947e-05	A0A1D5NTL9, A0A1D5PM27, Q5ZLF7, A0A1D5P954, F1NPP8, E1BVA4, F1NXG3, F1NPI7, A0A1D5P2P6, F1NTY0, P10157, F1NCA1, F1NU16, F1NYH9, F1NA92, F1NIT2, A0A1D5PZ01, Q5ZHP7, E1BQR4, A0A1D5PIB1, A0A1D5PYK1, E1BZI6, F1NW64, F1NRP9, Q5F428, E1C2F1, A0A1L1RX89, F1NQY0, A0A1L1RV09, A0A1D5PYW2, Q5ZM26, F1NX72, A0A167VDT2, Q5ZI72, Q5ZJ02, F1NEH5, F1P1G7, F1P157, F1N8V0, E1BUF4, A0A1D5PM87, F1NZ23, F1NK30, E1C473,…	431	932	10057	1.62738	0.0301791	0.0152051	0.114938
GOTERM_CC_DIRECT	GO:0005813~centrosome	24	4.27046	0.000190809	A0A1D5PWH3, A0A1D5PNE9, A0A1D5PME6, A0A1D5PB91, F1P2I6, E1C530, E1BVA4, F1N8V0, P0CB05, A0A1D5P1C4, E1BQM2, F1NKL4, A0A1D5P6H2, E1C2G3, A0A1L1RZ47, Q1G7G9, F1NYS6, F1P4A5, Q5ZK19, E1C6R0, E1C951, F1NB74, Q8AV28, Q4JIM4, A0A1D5PL93	431	236	10057	2.37296	0.0676375	0.0230742	0.262485
GOTERM_MF_DIRECT	GO:0003682~chromatin binding	22	3.91459	0.00021721	A0A167VDT2, F1NCM6, A0A1D5NTL9, Q5ZIZ5, F1NME8, F1NJ66, E1BX21, E1C1G7, E1BVH0, E1BXW9, F1NP26, P83038, E1BWB0, A0A1D5PM87, E1C473, A0A1D5PLW9, P50211, F1NMU1, E1C8H5, F1NXK0, F1NE18, F1NH28, A0A1D5P775	361	211	8532	2.46424	0.0786331	0.0401214	0.299935
GOTERM_MF_DIRECT	GO:0000166~nucleotide binding	20	3.55872	0.000678007	A0A1D5PET4, A0A1D5PEV1, Q5ZIZ5, R4GM88, A0A1D5PKJ9, F1NQT0, Q5ZI72, F1P4T6, F1NAU7, A0A1D5PMT9, A0A1D5P954, F1P1G7, F1NW30, F1P1X0, E1C0P0, A0A1D5PEA6, E1C525, Q5ZLP8, Q5F4B6, Q5F4A4, A0A1D5PUZ0	361	198	8532	2.38731	0.225622	0.0817006	0.933469
GOTERM_BP_DIRECT	GO:0055007~cardiac muscle cell differentiation	5	0.88968	0.000737787	R9PXM9, F1N8N7, E1C066, E1BQY3, Q9PWE8, A0A1D5PL73	414	10	8994	10.8623	0.700604	0.700604	1.23136
UP_KEYWORDS	Transcription	34	6.04982	0.000950803	R9PXM9, A0A1D5P1Y1, A0A1D5NTL9, Q98934, Q5ZI72, A0A1D5PQK8, F1NEH5, E1C4U8, Q9DEB6, F1P568, Q9PWE8, F1NEA7, P83038, F1NZ23, Q6JLB1, A0A1D5PVD7, P10157, Q5ZJK3, A0A1D5PK20, F1NSK6, A0A1D5PL23, P53413, E1C214, Q5ZIP4, F1NY57, F1P2F7, Q5ZHP7, A0A1D5P919, F1NRP9, A0A1D5PIB1, F1NP26, Q8JHU1, A0A1D5PZQ0, E1BS39, Q9W689, A0A1D5NXI5, A0A1D5P775	499	433	11626	1.82945	0.15817	0.0557765	1.16594
GOTERM_BP_DIRECT	GO:0033962~cytoplasmic mRNA processing body assembly	5	0.88968	0.00111757	F1NKL4, Q5ZKB9, A0A1D5PZ01, A0A1D5NZF2, E1BZI9	414	11	8994	9.87484	0.839125	0.598907	1.85963
GOTERM_CC_DIRECT	GO:0005814~centriole	9	1.60142	0.00115644	Q1G7G9, E1C8S5, F1P1V3, F1NGR2, F1P2I6, E1C3D6, E1BZA0, Q8AV28, P0CB05, E1C2W2	431	50	10057	4.20014	0.346008	0.100724	1.58108
GOTERM_MF_DIRECT	GO:0043565~sequence-specific DNA binding	25	4.4484	0.00115667	A0A167VDT2, R9PXM9, F1NM26, E1BYI1, A0A1L1RVP3, Q98934, E1C4U8, E1BVH0, F1NXG3, A0A1D5PSE4, Q9PWE8, A0A1D5NVQ6, P83038, R4GLZ3, P10157, F1NSK6, P53413, F1NY57, F1NWA0, A0A1D5PMT9, F1NRP9, A0A1D5PIB1, F1NP26, Q8JHU1, A0A1D5PE92, A0A1D5NTG3, A0A1D5PQG0	361	289	8532	2.04449	0.353587	0.103341	1.58761
UP_KEYWORDS	Zinc-finger	31	5.51601	0.00123076	A0A1D5PXQ1, Q98934, Q5ZJ02, E1BVY1, E1BY42, E1BU01, F1P1L9, A0A1D5PLW9, E1C2G3, F1NTY0, E1C7R9, Q04982, E1BSS0, E1C214, Q5ZIP4, F1NME8, A0A1D5NWC3, E1C3M0, A0A1D5PSM7, F1P2F7, A0A1D5PYE9, A0A1D5PIB1, Q8JHU1, E1BZI9, F1NT94, E1C3S2, F1NYR2, A0A1D5PCU3, F1NS44, E1C0E8, A0A1L1RPT1, A0A1D5P775	499	387	11626	1.8663	0.199808	0.0542017	1.50685
GOTERM_MF_DIRECT	GO:0003714~transcription corepressor activity	11	1.9573	0.00125483	F1P4G3, F1P4X5, A0A1D5PVD7, F1NTK9, P49337, F1P568, A0A1D5PYW2, F1NRP9, A0A1L1RPT1, F1NP26, A0A1D5PZQ0, P83038	361	76	8532	3.42076	0.377099	0.09033	1.72126
GOTERM_MF_DIRECT	GO:0001078~transcriptional repressor activity, RNA polymerase II core promoter proximal region sequence-specific binding	9	1.60142	0.00155963	E1C473, A0A1D5PX69, A0A1D5PVD7, F1NY57, Q5ZI70, F1P568, A0A1D5NTG3, E1BS39, E1BWB0	361	53	8532	4.01338	0.444806	0.0934172	2.13518
GOTERM_BP_DIRECT	GO:0035735~intraciliary transport involved in cilium morphogenesis	4	0.711744	0.00173289	E1BU32, E1C6R0, A0A1D5P6C2, Q8AV28	414	6	8994	14.4831	0.941223	0.611191	2.8696
GOTERM_MF_DIRECT	GO:0003700~transcription factor activity, sequence-specific DNA binding	24	4.27046	0.00200745	R9PXM9, Q5ZJK3, F1NSK6, A0A167VDT2, R4GIU7, P53413, E1BZC6, Q90979, E1BX21, F1NY57, E1BVH0, A0A1D5P919, F1NXG3, Q9DEB6, A0A1D5PIB1, Q9PWE8, A0A1D5PE92, A0A1D5NVQ6, E1BS39, A0A1D5NTG3, E1C135, F1NC32, A0A1D5PYW2, E1C1W0, A0A1D5P775	361	284	8532	1.99727	0.531195	0.102574	2.7404
GOTERM_MF_DIRECT	GO:0000978~RNA polymerase II core promoter proximal region sequence-specific DNA binding	16	2.84698	0.00287274	Q5ZJK3, F1NM26, Q90979, Q01795, A0A1D5PX69, F1NY57, Q5ZI70, F1NXG3, A0A1D5PIB1, A0A1I7Q431, Q8JHU1, A0A1D5NTG3, E1C473, Q6JLB1, F1NC32, A0A1L1RKP9, A0A1D5P775	361	159	8532	2.3783	0.661957	0.126784	3.90001
GOTERM_MF_DIRECT	GO:0044822~poly(A) RNA binding	41	7.29537	0.00287758	Q5ZIZ5, Q5ZKB9, E1C0L6, Q5ZI72, Q5ZJ02, A0A1D5P954, F1P1G7, E1BU24, E1C0C3, A0A1D5PEY1, E1C2P9, F1P1X0, F1NTY0, E1BV31, A0A1D5P6Q5, E1C525, E1BVP1, F1NU16, E1C7J9, A0A1L1RKL9, E1BXP3, F1NHI3, Q5ZIP4, A0A1D5PKJ9, Q5ZLE6, A0A1D5PZ01, F1NAU7, F1NTK9, E1BXW9, Q5F428, A0A1D5PE85, E1BZT5, F1NKL4, A0A1D5P778, F1P4X5, A0A1D5P6Z4, A0A1L1RX89, Q5ZME7, A0A1D5PEA6, A0A1D5P797, A0A1D5PS34, A0A1D5PV32	361	605	8532	1.60167	0.662575	0.113711	3.90645
GOTERM_BP_DIRECT	GO:0060173~limb development	7	1.24555	0.00296238	R9PXM9, F1NM26, Q76KB2, F1NY39, P32760, F1NR30, Q9PWE8, O73755, A0A1D5P775	414	32	8994	4.75226	0.992154	0.702377	4.85843
GOTERM_MF_DIRECT	GO:0003723~RNA binding	18	3.20285	0.00320889	F1NV23, A0A1D5PEV1, Q5ZKB9, F1P179, Q5ZI72, A0A1D5PHS9, A0A1D5P5T8, A0A1D5NZ24, E1BXW9, F1P1G7, F1NRP9, Q5ZLM1, Q5ZME7, F1NDA1, F1NB74, E1BV31, F1NU16, A0A1D5PUZ0	361	193	8532	2.20424	0.702309	0.114117	4.34702
UP_KEYWORDS	Transcription regulation	31	5.51601	0.00366629	R9PXM9, A0A1D5P1Y1, A0A1D5NTL9, Q98934, Q5ZI72, A0A1D5PQK8, F1NEH5, Q9DEB6, F1P568, Q9PWE8, F1NEA7, P83038, F1NZ23, A0A1D5PVD7, P10157, Q5ZJK3, A0A1D5PK20, F1NSK6, A0A1D5PL23, P53413, E1C214, Q5ZIP4, F1P2F7, Q5ZHP7, A0A1D5P919, F1NRP9, A0A1D5PIB1, F1NP26, Q8JHU1, A0A1D5PZQ0, E1BS39, Q9W689, A0A1D5NXI5, A0A1D5P775	499	416	11626	1.73619	0.485633	0.124503	4.42743
GOTERM_MF_DIRECT	GO:0004843~thiol-dependent ubiquitin-specific protease activity	8	1.42349	0.00371228	R4GJH4, Q9W689, E1C214, R9PXQ8, E1C3M0, A0A1D5P1U9, F1P541, F1NZV6	361	48	8532	3.93906	0.753929	0.119677	5.01282
UP_KEYWORDS	Bromodomain	5	0.88968	0.00401232	E1BSS0, A0A1D5NTL9, F1P2F7, F1NJP2, A0A1D5PC01	499	16	11626	7.28081	0.516977	0.114216	4.83585
GOTERM_BP_DIRECT	GO:0045944~positive regulation of transcription from RNA polymerase II promoter	31	5.51601	0.00450097	A0A167VDT2, R9PXM9, Q01795, E1BUS5, A0A1D5PX69, E1BX21, A0A1L1RVP3, A0A1D5PQK8, F1NEH5, Q9DEB6, A0A1I7Q431, F1P568, Q9PWE8, A0A1L4FLT3, P83038, F1NZ23, F1NE32, P10157, F1NCA1, Q5ZJK3, A0A1D5PK20, E1C214, F1NFB5, A0A1D5PMT9, Q5ZHP7, F1NP26, Q8JHU1, A0A1D5NTG3, E1C135, F1NC32, P50211, A0A1D5PFT4, E1BWJ3, A0A1D5NV71, A0A1D5P775	414	395	8994	1.70497	0.999371	0.771046	7.29332
GOTERM_CC_DIRECT	GO:0016020~membrane	42	7.47331	0.0048222	Q5ZIZ5, A0A1L1RSI5, Q5ZKB9, F1P179, A0A1D5PEI6, A0A1D5P4V8, F1NPP8, E1BX04, R4GF29, E1BY42, F1NIS1, F1NBT0, F1P4P9, A0A1D5PM87, F1NPI7, F1NEG1, F1P1X0, A0A1D5NZF2, E1C525, A0A1D5PFI9, A0A1D5PL93, E1C7J9, A0A1D5PUZ0, A0A1L1RKL9, F1P4R5, Q5ZIP4, Q5ZLE6, A0A1D5PZ01, F1NTK9, F1NRP9, A0A1D5PHS5, A0A1D5P8W2, Q5F428, F1P4X9, E1BQM2, E1BZT5, F1NKL4, E1C6E8, A0A1L1RX89, A0A1L1RML1, F1NGR2, F1NPS0, E1BWJ3,…	431	633	10057	1.54823	0.830352	0.29869	6.44099
GOTERM_BP_DIRECT	GO:0006351~transcription, DNA-templated	31	5.51601	0.00551182	R9PXM9, A0A1D5P1Y1, A0A1D5NTL9, A0A1D5PX69, Q98934, Q5ZI72, A0A1D5PQK8, F1NEH5, E1C4U8, F1P568, E1BVY1, Q9PWE8, F1NEA7, P83038, A0A1D5PVD7, P10157, Q5ZJK3, A0A1D5PK20, F1NSK6, A0A1D5PL23, P53413, E1C214, F1NY57, F1P2F7, Q5ZHP7, A0A1D5P919, F1NRP9, A0A1D5PIB1, F1NP26, A0A1D5PZQ0, Q9W689, F1NC32, A0A1D5NXI5, A0A1D5P775	414	401	8994	1.67946	0.99988	0.778028	8.86101
GOTERM_CC_DIRECT	GO:0005737~cytoplasm	107	19.0391	0.0061386	A0A1D5PEV1, F1P179, F1NBT0, Q5F454, E1C3T7, E1C2G3, E1BVP1, Q04982, R4GM88, E1BQV7, R4GIU7, F1P4G3, A0A1D5PIB1, E1BQM7, F1N8E4, R4GJH4, A0A1D5PCG0, A0A1L1RX89, A0A1L1RV09, R4GI70, A0A1D5NXI5, F1N843, A0A1D5PCU3, A0A1L1RPT1, F1NX72, A0A1D5P775, A0A1D5PET4, R9PXM9, Q5ZI72, A0A1D5P4V8, F1NR30, E1BUF6, R4GF29, F1N8V0, E1BUF4, F1P568, P49337, Q9PWE8, F1P1L9, E1BUN6, A0A1D5PLW4, A0A1D5PL93, F1NE72, A0A…	431	1984	10057	1.25844	0.895629	0.313833	8.13119
GOTERM_CC_DIRECT	GO:0016605~PML body	8	1.42349	0.00629891	E1BUN6, F1P4G3, F1P1F3, F1NT94, F1NC77, E1C8H5, E1BWW3, F1NUX4	431	52	10057	3.58986	0.901629	0.282001	8.33508
GOTERM_BP_DIRECT	GO:0006974~cellular response to DNA damage stimulus	9	1.60142	0.00642572	E1BUS5, R4GJH4, E1C473, E1C214, F1NPA4, E1BQK9, F1NMU1, F1NCA1, Q4JIM4	414	61	8994	3.20527	0.999973	0.777936	10.2569
UP_KEYWORDS	DNA-binding	37	6.58363	0.0081932	R9PXM9, Q01795, A0A1D5P1Y1, A0A1D5NTL9, F1NM26, E1BYI1, F1NQT0, Q98934, Q5ZI72, Q5ZJ02, F1NAA2, E1C4U8, F1NXG3, Q9DEB6, A0A1I7Q431, F1P568, A0A1D5PSE4, Q9PWE8, F1NEA7, A0A1D5NXF5, F1NZ23, Q6JLB1, P10157, Q5ZJK3, F1NSK6, P53413, A0A1D5PL23, F1P1F3, F1NY57, F1P2F7, A0A1D5P919, A0A1D5PIB1, Q8JHU1, F1N8E4, E1BS39, P50211, A0A1D5PQG0, A0A1D5PYW2, A0A1D5P775	499	554	11626	1.55604	0.774419	0.191622	9.64547
UP_KEYWORDS	Zinc	38	6.76157	0.00956991	Q5ZI20, A0A1D5PXQ1, Q98934, Q5ZJ02, F1NCP5, E1BVY1, E1BY42, E1BU01, P83038, F1P1L9, A0A1D5PLW9, E1C2G3, F1NTY0, E1C7R9, Q04982, A0A1D5NWT1, E1BSS0, P53413, E1C214, F1NME8, Q5ZIP4, A0A1D5NWC3, E1C3M0, A0A1D5PSM7, F1NB68, F1P2F7, A0A1D5PYE9, A0A1D5PIB1, F1NP26, Q8JHU1, E1BZI9, F1NT94, P50211, E1C3S2, F1NYR2, A0A1D5PCU3, A0A1L1RPT1, E1C0E8, F1NS44, A0A1D5P775	499	579	11626	1.5291	0.824567	0.195522	11.1797
GOTERM_MF_DIRECT	GO:0001228~transcriptional activator activity, RNA polymerase II transcription regulatory region sequence-specific binding	8	1.42349	0.00964964	R9PXM9, E1BSS0, A0A1D5PM87, Q01795, E1BYI1, F1NEH5, A0A1D5P919, Q5ZHP7, A0A1I7Q431, Q9PWE8, R4GLZ3	361	57	8532	3.3171	0.974154	0.262605	12.5481
GOTERM_BP_DIRECT	GO:0006511~ubiquitin-dependent protein catabolic process	10	1.77936	0.0107489	R4GJH4, E1C214, R9PXQ8, E1C3M0, A0A1D5P1U9, Q5ZI32, F1P541, F1P006, F1NS44, F1NZV6	414	80	8994	2.71558	1	0.890007	16.5916
GOTERM_CC_DIRECT	GO:0010494~cytoplasmic stress granule	5	0.88968	0.011056	F1NV23, Q5ZKB9, F1P1X0, A0A1D5PZ01, E1BZI9	431	21	10057	5.55574	0.983095	0.399517	14.1978
GOTERM_BP_DIRECT	GO:0006366~transcription from RNA polymerase II promoter	11	1.9573	0.0115752	R9PXM9, Q01795, F1NZ23, Q6JLB1, F1NKF0, F1NEH5, F1NWA0, Q5ZHP7, Q9DEB6, A0A1I7Q431, Q9PWE8, A1IIE6, A0A1D5NTG3, E1BS39	414	95	8994	2.51548	1	0.879221	17.7535
GOTERM_BP_DIRECT	GO:0035520~monoubiquitinated protein deubiquitination	3	0.533808	0.0118663	R4GJH4, Q9W689, A0A1D5P1U9	414	4	8994	16.2935	1	0.857804	18.1592
GOTERM_BP_DIRECT	GO:0045893~positive regulation of transcription, DNA-templated	17	3.02491	0.0132871	R9PXM9, E1C214, Q98934, F1NEH5, A0A1D5PMT9, E1BUF6, Q5ZHP7, P49337, Q9PWE8, A0A1D5P8W2, F1NYG9, A0A1D5NVQ6, F1NT94, A0A1L1RML1, A0A1D5PQG0, E1C7R9, E1AWU3, E1C113, Q4JIM4	414	189	8994	1.95407	1	0.86289	20.1125
GOTERM_MF_DIRECT	GO:0003713~transcription coactivator activity	10	1.77936	0.0142655	E1BSS0, E1C214, F1NT94, E1BQY3, A0A1D5PLW4, F1N8A3, E1C7R9, A0A1D5PMT9, E1BXW9, E1BWJ3	361	91	8532	2.59718	0.995559	0.340768	18.0189
GOTERM_BP_DIRECT	GO:0007224~smoothened signaling pathway	7	1.24555	0.0145387	F1P4G3, Q1G7G9, A0A1D5PME6, A0A1D5P6C2, F1NYG9, E1C5M1, A0A1D5P775	414	44	8994	3.45619	1	0.86388	21.7966
GOTERM_MF_DIRECT	GO:0030374~ligand-dependent nuclear receptor transcription coactivator activity	5	0.88968	0.0146074	A0A1D5PK20, E1BUS5, F1P4X5, A0A1D5PFT4, A0A1D5PMT9	361	23	8532	5.1379	0.996103	0.327167	18.4112
GOTERM_MF_DIRECT	GO:0003730~mRNA 3'-UTR binding	5	0.88968	0.0146074	F1NV23, A0A1D5PET4, R4GM88, Q5ZLP8, A0A1D5P3C8, E1BZI9	361	23	8532	5.1379	0.996103	0.327167	18.4112
GOTERM_MF_DIRECT	GO:0019905~syntaxin binding	5	0.88968	0.0146074	Q5ZL19, A0A1D5P6H2, E1BWS2, F1P3I0, F1P0Q4	361	23	8532	5.1379	0.996103	0.327167	18.4112
GOTERM_MF_DIRECT	GO:0036459~thiol-dependent ubiquitinyl hydrolase activity	4	0.711744	0.0155403	R4GJH4, R9PXQ8, E1C3M0, E1BU81	361	13	8532	7.27211	0.997273	0.325408	19.4728
GOTERM_BP_DIRECT	GO:0006606~protein import into nucleus	6	1.06762	0.0163524	A0A1D5PCG0, Q5ZLF7, A0A1L1RX89, A0A1D5PXQ1, F1NPS0, A0A1D5NZ24	414	33	8994	3.94993	1	0.874111	24.178
GOTERM_MF_DIRECT	GO:0003676~nucleic acid binding	18	3.20285	0.0167459	F1NE72, A0A1D5PEV1, F1NHI3, F1NYH9, F1NVH0, A0A1D5P954, F1NW30, A0A1D5P0E4, A0A1D5NTG3, F1NPI7, F1NQY0, A0A1D5PLW4, A0A1D5PEA6, Q5F4B6, A0A1D5PGH7, A0A1D5NW99, A0A1D5PUZ0, A0A1D5P775	361	229	8532	1.85772	0.998282	0.328282	20.8258
GOTERM_CC_DIRECT	GO:0031201~SNARE complex	6	1.06762	0.0176353	Q5ZL19, A0A1D5P6H2, F1NC47, E1BWS2, F1P0S2, Q5ZMP2	431	36	10057	3.88902	0.998541	0.515938	21.7343
GOTERM_BP_DIRECT	GO:0009791~post-embryonic development	7	1.24555	0.0178721	F1N973, F1NY57, F1NV02, Q4JIM4, A0A1D5PV32, R4GLZ3, F1NUX4	414	46	8994	3.30592	1	0.878129	26.1207
GOTERM_BP_DIRECT	GO:0016579~protein deubiquitination	6	1.06762	0.0184702	R4GJH4, R9PXQ8, E1C3M0, E1BU81, F1P541, F1NZV6	414	34	8994	3.83376	1	0.868774	26.8723
GOTERM_BP_DIRECT	GO:0000301~retrograde transport, vesicle recycling within Golgi	3	0.533808	0.0191791	E1C947, F1NXB9, F1NHU0	414	5	8994	13.0348	1	0.861612	27.754
GOTERM_BP_DIRECT	GO:0006886~intracellular protein transport	13	2.31317	0.0200954	E1BTY4, F1P0U3, Q5ZL19, F1P4R5, E1BWS2, A0A1D5P997, F1P0S2, F1N8F2, F1NZX7, F1NXB9, A0A1D5NTC8, F1P3I0, Q5ZMP2	414	134	8994	2.10761	1	0.857896	28.8787
GOTERM_CC_DIRECT	GO:0005643~nuclear pore	5	0.88968	0.0204355	F1NFR4, Q5ZLF7, A0A1L1RX89, F1P157, E1BRU0	431	25	10057	4.66682	0.999488	0.531281	24.7518
GOTERM_CC_DIRECT	GO:0045171~intercellular bridge	5	0.88968	0.0204355	Q5F4C5, E1BX21, A0A1D5PLW4, E1C7R9, E1BVA4	431	25	10057	4.66682	0.999488	0.531281	24.7518
GOTERM_MF_DIRECT	GO:0046872~metal ion binding	36	6.40569	0.022563	Q5ZJ02, F1NCP5, E1BU01, A0A1D5NVQ6, P83038, E1BWB0, F1NIN5, F1P1L9, F1P217, A0A1D5P2P6, A0A1D5PLW4, Q5F3B9, F1NTY0, Q04982, E1BZC6, Q5ZIP4, A0A1D5NWC3, F1N8N7, F1NVH0, F1NWA0, A0A1D5PYE9, F1NP26, E1C5C9, A0A1D5PE92, A0A1D5NTG3, A0A1D5P0E4, F1NXG0, F1NQY0, A0A1D5PNS2, A0A1D5PIF0, A0A1D5PYW2, A0A1L1RPT1, E1C1W0, A0A1D5PJ02, A0A1D5PGH7, A0A1D5NW99, Q5F4A4, A0A1D5P775	361	586	8532	1.45194	0.999817	0.397157	27.0627
GOTERM_CC_DIRECT	GO:0000790~nuclear chromatin	10	1.77936	0.0226612	Q5ZJK3, A0A167VDT2, F1NC32, F1NK30, F1NEG1, Q5ZI70, A0A1D5P919, A0A1D5P6C2, F1NXK0, A0A1D5PZQ0	431	97	10057	2.40558	0.999778	0.534554	27.0728
GOTERM_BP_DIRECT	GO:0006357~regulation of transcription from RNA polymerase II promoter	16	2.84698	0.0230362	Q90979, A0A1D5P1Y1, A0A1D5PQK8, A0A1D5P919, F1NXG3, Q9DEB6, A0A1D5P6C2, E1BY42, A0A1D5P8W2, E1BWB0, F1NC32, E1BQY3, A0A1D5PLW4, E1C1W0, P10157, A0A1D5NV71	414	185	8994	1.87889	1	0.879443	32.3781
GOTERM_MF_DIRECT	GO:0001106~RNA polymerase II transcription corepressor activity	4	0.711744	0.0232292	E1C2F1, A0A1D5PLW9, E1BX21, E1BVH0	361	15	8532	6.30249	0.999858	0.388758	27.7472
GOTERM_MF_DIRECT	GO:0008139~nuclear localization sequence binding	4	0.711744	0.0232292	A0A1D5PCG0, Q5ZLF7, A0A1L1RX89, A0A1D5PXQ1	361	15	8532	6.30249	0.999858	0.388758	27.7472
GOTERM_BP_DIRECT	GO:0006338~chromatin remodeling	6	1.06762	0.0232297	A0A167VDT2, E1BVH0, A0A1L1RPT1, F1NP26, E1C8H5, A0A1D5PC01, P83038	414	36	8994	3.62077	1	0.86752	32.6027
GOTERM_CC_DIRECT	GO:0031410~cytoplasmic vesicle	8	1.42349	0.0237718	E1C2G3, F1N8N7, R4GH92, A0A1D5PLX3, Q5ZKV5, F1NUN3, A0A1D5P206, Q4JIM4	431	67	10057	2.78616	0.999854	0.520878	28.2059
GOTERM_BP_DIRECT	GO:0090398~cellular senescence	4	0.711744	0.0239774	A0A1D5PM27, F1NT94, A0A1D5PCM8, E1BWW3	414	14	8994	6.20704	1	0.86232	33.4636
GOTERM_BP_DIRECT	GO:0001731~formation of translation preinitiation complex	4	0.711744	0.0239774	Q5ZLE6, F1NDA1, Q5ZJ64, Q5F428, A0A1L1RKL9	414	14	8994	6.20704	1	0.86232	33.4636
GOTERM_MF_DIRECT	GO:0005096~GTPase activator activity	12	2.13523	0.0272111	F1P0U3, F1NIE8, A0A1D5PH95, A0A1D5P6H3, E1BVM2, A0A1D5NU51, F1N8F2, F1P3Y3, A0A1L1RLY0, A0A1D5PFI9, F1NKX8, A0A1L1RJY0	361	135	8532	2.10083	0.99997	0.421552	31.7152
GOTERM_BP_DIRECT	GO:1904153~negative regulation of retrograde protein transport, ER to cytosol	3	0.533808	0.0279023	Q5ZJQ8, A0A1L1RND8, F1NCV8	414	6	8994	10.8623	1	0.88941	37.8154
GOTERM_BP_DIRECT	GO:0045892~negative regulation of transcription, DNA-templated	14	2.4911	0.0283858	F1NSK6, Q5ZIZ5, A0A1D5P1Y1, Q01795, P49337, A0A1I7Q431, O73755, F1NP26, P83038, R4GJH4, F1NC32, F1NT94, P50211, F1NNJ0, A0A1L1RPT1, A0A1D5P775	414	157	8994	1.93723	1	0.882203	38.3326
GOTERM_BP_DIRECT	GO:0030326~embryonic limb morphogenesis	5	0.88968	0.029398	R9PXM9, A0A167VDT2, Q9PWE8, O73755, F1NYG9, Q4JIM4	414	26	8994	4.17781	1	0.879951	39.4023
GOTERM_BP_DIRECT	GO:0042384~cilium assembly	9	1.60142	0.0298915	F1NC32, A0A1D5P6H2, Q1G7G9, E1BU32, E1C6R0, E1C3D6, E1BVA4, E1BZA0, Q8AV28	414	80	8994	2.44402	1	0.873328	39.9175
GOTERM_CC_DIRECT	GO:0012505~endomembrane system	7	1.24555	0.0315519	F1P0U3, Q5ZL19, F1N8F2, F1NRL3, F1NUX4, F1P0S2, Q5ZMP2	431	56	10057	2.91676	0.999992	0.595495	35.6977
GOTERM_BP_DIRECT	GO:0002244~hematopoietic progenitor cell differentiation	6	1.06762	0.0317432	A0A1D5PKJ9, E1BX21, F1N843, A0A1D5NV71, E1C833, Q4JIM4	414	39	8994	3.34225	1	0.878566	41.8139
GOTERM_CC_DIRECT	GO:0005852~eukaryotic translation initiation factor 3 complex	3	0.533808	0.0332044	Q5ZLE6, Q5ZJ64, Q5F428, A0A1L1RKL9	431	7	10057	10.0003	0.999996	0.587372	37.1925
GOTERM_CC_DIRECT	GO:0005694~chromosome	5	0.88968	0.0335838	A0A1D5NWV4, F1NPI7, F1P1F3, F1NPA4, F1NX72	431	29	10057	4.02312	0.999996	0.566472	37.5312
GOTERM_BP_DIRECT	GO:0048278~vesicle docking	4	0.711744	0.0344748	Q5ZL19, E1BZA0, F1P0S2, Q5ZMP2	414	16	8994	5.43116	1	0.889732	44.5091
GOTERM_BP_DIRECT	GO:0007507~heart development	10	1.77936	0.0356611	R9PXM9, E1BSS0, E1C3S2, P32760, F1NR30, E1AP05, F1P568, Q9PWE8, A0A1L1RPT1, A0A1D5P775, A0A1D5NTG3	414	98	8994	2.2168	1	0.888928	45.6426
GOTERM_MF_DIRECT	GO:0005543~phospholipid binding	5	0.88968	0.0359202	A0A1D5NU51, F1NF09, A0A1D5P797, F1NRL3, F1NV02	361	30	8532	3.93906	0.999999	0.498201	39.7
GOTERM_MF_DIRECT	GO:0035091~phosphatidylinositol binding	7	1.24555	0.0372193	E1BTY4, A0A1D5PLW9, A0A1D5PUY9, A0A1D5PCR1, F1NZX7, A0A1D5PLX3, E1C1G0	361	59	8532	2.80408	0.999999	0.493852	40.8139
GOTERM_BP_DIRECT	GO:0034063~stress granule assembly	3	0.533808	0.0378914	F1NV23, F1NKL4, A0A1D5PZ01	414	7	8994	9.31056	1	0.895044	47.7149
GOTERM_BP_DIRECT	GO:0007252~I-kappaB phosphorylation	3	0.533808	0.0378914	A0A1D5PT87, E1C063, A0A1L4FLT3	414	7	8994	9.31056	1	0.895044	47.7149
GOTERM_CC_DIRECT	GO:0072686~mitotic spindle	4	0.711744	0.039281	E1C625, A0A1D5PHS5, A0A1D5NX41, E1BRU0	431	18	10057	5.18536	1	0.601155	42.4167
GOTERM_MF_DIRECT	GO:0008565~protein transporter activity	6	1.06762	0.0398843	A0A1D5PCG0, Q5ZLF7, A0A1L1RX89, A0A1D5NZ24, A0A1D5PYE9, F1NXB9	361	45	8532	3.15125	1	0.50216	43.0395
GOTERM_MF_DIRECT	GO:0000977~RNA polymerase II regulatory region sequence-specific DNA binding	9	1.60142	0.0399125	R9PXM9, E1BZC6, E1C135, F1NME8, A0A1D5PLW9, F1NEH5, Q5ZHP7, Q9DEB6, Q9PWE8, F1NEA7, F1NBU3	361	92	8532	2.31206	1	0.487078	43.0627
UP_KEYWORDS	Cytoplasm	41	7.29537	0.040338	A0A1D5PEV1, Q5ZKB9, Q5ZI72, F1NJ60, A0A1D5P4V8, F1NCP5, F1P2I6, F1P157, F1N8V0, Q5ZJ64, A0A1D5PL73, F1P1L9, F1NK30, F1P1V3, A0A1D5NZF2, Q5ZLP8, A0A1D5NWT1, Q04982, A0A1L1RKL9, Q5ZJK3, F1NFR4, R4GM88, Q5ZLE6, F1NB68, E1BXW9, A0A1D5NZ24, A0A1D5P919, A0A1D5PL45, Q5ZKM0, P0CB05, Q5F428, F1N8E4, E1BQM2, F1P0Q4, R4GJH4, A0A1D5PCG0, Q1G7G9, Q90687, A0A1D5NXI5, F1P006, F1N843, Q8AV28, F1NB74, Q5F4A4, A0A…	499	703	11626	1.35881	0.99942	0.563103	39.808
GOTERM_BP_DIRECT	GO:0000184~nuclear-transcribed mRNA catabolic process, nonsense-mediated decay	4	0.711744	0.040475	A0A1D5PE85, A0A1D5PSK6, A0A1D5PHS9, E1C525	414	17	8994	5.11168	1	0.902509	50.0226
GOTERM_CC_DIRECT	GO:0017053~transcriptional repressor complex	5	0.88968	0.0416394	E1C2F1, A0A1D5PLW9, E1BX21, F1NP26, P83038, A0A1D5P775	431	31	10057	3.76357	1	0.600752	44.3334
GOTERM_BP_DIRECT	GO:0008104~protein localization	5	0.88968	0.0419664	F1NZ23, E1C4G2, F1NRP9, E1C929, Q5ZIF2	414	29	8994	3.74563	1	0.903201	51.3108
GOTERM_BP_DIRECT	GO:0000122~negative regulation of transcription from RNA polymerase II promoter	20	3.55872	0.0422195	E1BSS0, A0A167VDT2, F1P4G3, E1BX21, A0A1D5PQK8, A0A1D5NVH3, F1NRP9, F1P568, F1NP26, Q8JHU1, F1NEA7, F1NYG9, P83038, A0A1D5PLW9, P50211, E1BQY3, A0A1D5PYW2, F1NE32, A0A1D5NX41, Q4JIM4, A0A1D5P775	414	270	8994	1.60923	1	0.897071	51.5262
GOTERM_CC_DIRECT	GO:0090575~RNA polymerase II transcription factor complex	4	0.711744	0.0452101	Q5ZIZ5, Q01795, F1P4G3, A0A1I7Q431, Q8JHU1	431	19	10057	4.91244	1	0.610648	47.1231
GOTERM_BP_DIRECT	GO:0007067~mitotic nuclear division	7	1.24555	0.0456151	E1BTY4, E1C214, F1NK30, R9PXQ8, F1P2I6, A0A1D5PHS5, F1NXK0, P0CB05	414	57	8994	2.66794	1	0.907821	54.3319
GOTERM_CC_DIRECT	GO:0005667~transcription factor complex	11	1.9573	0.0473733	E1BSS0, A0A167VDT2, A0A1D5P1Y1, Q90979, E1BUS5, E1C135, E1BYI1, E1BX21, E1C1W0, P10157, F1NEA7	431	128	10057	2.00527	1	0.60837	48.7494
GOTERM_BP_DIRECT	GO:0000722~telomere maintenance via recombination	3	0.533808	0.0490123	F1NEG1, Q5ZM26, E1BWW3	414	8	8994	8.14674	1	0.916953	56.9855
GOTERM_BP_DIRECT	GO:0002042~cell migration involved in sprouting angiogenesis	3	0.533808	0.0490123	F1N8N7, F1NR30, O73755	414	8	8994	8.14674	1	0.916953	56.9855
GOTERM_BP_DIRECT	GO:0051301~cell division	8	1.42349	0.049494	E1BWA7, E1C214, F1NK30, R9PXQ8, F1P2I6, F1NXK0, P0CB05, E1BW90, A0A1D5PL93	414	73	8994	2.38078	1	0.912796	57.3498
GOTERM_BP_DIRECT	GO:0051091~positive regulation of sequence-specific DNA binding transcription factor activity	6	1.06762	0.0497981	E1C3T7, E1BSS0, F1P4G3, E1BQY3, A0A1D5PMT9, F1NP26, P83038	414	44	8994	2.96245	1	0.907887	57.5782
GOTERM_BP_DIRECT	GO:0006355~regulation of transcription, DNA-templated	25	4.4484	0.0545761	A0A1D5NWV4, F1NM26, Q5ZIZ5, A0A1D5NTL9, Q5ZI72, A0A1D5PSE4, A0A1D5PC01, F1NZ23, A0A1D5P2P6, F1NAU5, F1NSK6, F1P4R5, A0A1D5PL23, P53413, E1BZC6, Q5ZIP4, F1NME8, F1P2F7, F1NRP9, Q5F371, A0A1D5PZQ0, A0A1D5NTG3, Q9W689, F1P4X5, A0A1D5NXI5	414	370	8994	1.46788	1	0.921708	61.0205
GOTERM_MF_DIRECT	GO:0001105~RNA polymerase II transcription coactivator activity	4	0.711744	0.0564194	F1P4G3, P50211, E1BQY3, E1BVH0	361	21	8532	4.50178	1	0.598375	55.203
GOTERM_BP_DIRECT	GO:0043433~negative regulation of sequence-specific DNA binding transcription factor activity	5	0.88968	0.0571281	A0A1D5PVD7, F1P568, F1NRP9, F1NP26, F1NYG9, P83038	414	32	8994	3.39447	1	0.925565	62.7497
GOTERM_BP_DIRECT	GO:0000082~G1/S transition of mitotic cell cycle	5	0.88968	0.0571281	E1C2F1, F1N8N7, R9PXQ8, Q5ZMH4, A0A1D5NV71	414	32	8994	3.39447	1	0.925565	62.7497
GOTERM_BP_DIRECT	GO:0001570~vasculogenesis	5	0.88968	0.0571281	A0A1D5NZ11, E1BQY3, F1N973, F1NFB5, E1C5Z2	414	32	8994	3.39447	1	0.925565	62.7497
UP_KEYWORDS	Mitosis	6	1.06762	0.057492	E1C214, F1NK30, R9PXQ8, F1P2I6, F1NXK0, P0CB05, E1BW90	499	49	11626	2.85289	0.999978	0.65758	51.8092
GOTERM_CC_DIRECT	GO:0016235~aggresome	4	0.711744	0.0583047	Q5ZIP4, F1NLF0, E1BUF4, Q4JIM4	431	21	10057	4.44459	1	0.66791	56.2817
GOTERM_MF_DIRECT	GO:0003743~translation initiation factor activity	5	0.88968	0.0583312	Q5ZLE6, F1NDA1, E1BVP1, Q5ZJ64, Q5F428, A0A1L1RKL9	361	35	8532	3.37634	1	0.595997	56.4419
GOTERM_BP_DIRECT	GO:0030220~platelet formation	3	0.533808	0.0611407	E1BSS0, Q90687, F1N843	414	9	8994	7.24155	1	0.933653	65.3234
GOTERM_CC_DIRECT	GO:0032039~integrator complex	3	0.533808	0.06539	F1NPA4, F1P4X9, A0A1I7Q410	431	10	10057	7.00023	1	0.693287	60.6008
GOTERM_CC_DIRECT	GO:0033290~eukaryotic 48S preinitiation complex	3	0.533808	0.06539	Q5ZLE6, Q5ZJ64, Q5F428, A0A1L1RKL9	431	10	10057	7.00023	1	0.693287	60.6008
GOTERM_CC_DIRECT	GO:0016282~eukaryotic 43S preinitiation complex	3	0.533808	0.06539	Q5ZLE6, Q5ZJ64, Q5F428, A0A1L1RKL9	431	10	10057	7.00023	1	0.693287	60.6008
GOTERM_CC_DIRECT	GO:0005801~cis-Golgi network	4	0.711744	0.0654476	E1C947, A0A1D5PNE9, F1NXB9, E1C1F2	431	22	10057	4.24256	1	0.676693	60.6343
UP_KEYWORDS	Thiol protease	6	1.06762	0.0661545	R4GJH4, Q9W689, E1C214, R9PXQ8, E1C3M0, F1P541	499	51	11626	2.74101	0.999996	0.675743	56.9944
GOTERM_MF_DIRECT	GO:0001077~transcriptional activator activity, RNA polymerase II core promoter proximal region sequence-specific binding	10	1.77936	0.0666362	A0A167VDT2, Q90979, F1NM26, E1C473, E1BQY3, F1NXG3, A0A1L1RKP9, A0A1D5PIB1, Q8JHU1, F1NBU3	361	120	8532	1.96953	1	0.632092	61.4637
GOTERM_BP_DIRECT	GO:0001756~somitogenesis	5	0.88968	0.0686567	E1BSS0, Q01795, E1C2G3, P32760, A0A1I7Q431, Q4JIM4	414	34	8994	3.1948	1	0.94921	69.7004
GOTERM_MF_DIRECT	GO:0000979~RNA polymerase II core promoter sequence-specific DNA binding	5	0.88968	0.0689724	E1BSS0, Q5ZJK3, F1NXG0, Q6JLB1, A0A1D5P919	361	37	8532	3.19383	1	0.631341	62.7763
GOTERM_CC_DIRECT	GO:0005794~Golgi apparatus	22	3.91459	0.0690499	F1NG40, F1NAU7, R4GH92, F1NCP5, F1NPP8, E1AP05, A0A1D5PYK1, E1C1F2, F1NEL5, F1NYG9, F1NK30, F1NT94, A0A1D5PXB5, A0A1D5PVD7, E1C3Z8, A0A1D5PLX3, A0A1D5P6Q5, A0A1L1RZA5, F1NNJ0, Q4JIM4, F1NV02, Q7T2H2, F1P5I8	431	347	10057	1.4794	1	0.680719	62.6735
GOTERM_CC_DIRECT	GO:0031965~nuclear membrane	9	1.60142	0.0702021	F1NV23, F1NIE8, E1BV94, A0A1D5PCG0, A0A1D5PXQ1, A0A1D5PQK8, A0A1D5NW24, Q8AV28, F1NH28	431	102	10057	2.05889	1	0.671445	63.3048
GOTERM_MF_DIRECT	GO:0004402~histone acetyltransferase activity	4	0.711744	0.0706709	E1BSS0, F1NT94, A0A1D5PQK8, F1N8A3	361	23	8532	4.11032	1	0.627243	63.7044
GOTERM_BP_DIRECT	GO:0000042~protein targeting to Golgi	3	0.533808	0.074161	F1P4P9, A0A1D5PYK1, E1C1F2	414	10	8994	6.51739	1	0.957049	72.5703
GOTERM_BP_DIRECT	GO:0002092~positive regulation of receptor internalization	3	0.533808	0.074161	F1NWS5, O73755, F1NT80	414	10	8994	6.51739	1	0.957049	72.5703
GOTERM_BP_DIRECT	GO:0016180~snRNA processing	3	0.533808	0.074161	F1NPA4, F1P4X9, A0A1I7Q410	414	10	8994	6.51739	1	0.957049	72.5703
GOTERM_BP_DIRECT	GO:0035855~megakaryocyte development	3	0.533808	0.074161	E1BSS0, Q90687, F1N843	414	10	8994	6.51739	1	0.957049	72.5703
GOTERM_MF_DIRECT	GO:0000980~RNA polymerase II distal enhancer sequence-specific DNA binding	5	0.88968	0.0746424	Q5ZIZ5, F1NM26, F1NWA0, Q9DEB6, E1BS39	361	38	8532	3.10978	1	0.635225	65.7914
GOTERM_BP_DIRECT	GO:0045665~negative regulation of neuron differentiation	5	0.88968	0.0748368	E1C2G3, Q5ZKB9, P50211, A0A1D5PYW2, A0A1D5P775	414	35	8994	3.10352	1	0.954952	72.9045
GOTERM_BP_DIRECT	GO:0006367~transcription initiation from RNA polymerase II promoter	4	0.711744	0.0775544	F1NZ23, E1BWJ3, A0A1D5P8W2, A1IIE6	414	22	8994	3.94993	1	0.956746	74.2101
GOTERM_BP_DIRECT	GO:0034644~cellular response to UV	4	0.711744	0.0775544	E1BSS0, A0A167VDT2, R4GJH4, F1NC77	414	22	8994	3.94993	1	0.956746	74.2101
GOTERM_BP_DIRECT	GO:0042752~regulation of circadian rhythm	4	0.711744	0.0775544	Q5ZIZ5, Q98934, A0A1D5PMT9, F1P568	414	22	8994	3.94993	1	0.956746	74.2101
GOTERM_BP_DIRECT	GO:0035264~multicellular organism growth	6	1.06762	0.0834166	A0A1D5PEZ2, Q90687, Q0ZM14, E1C8H5, A0A1D5PV32, F1NUX4	414	51	8994	2.55584	1	0.96348	76.8276
GOTERM_CC_DIRECT	GO:0000922~spindle pole	5	0.88968	0.0837099	F1P2I6, E1C951, F1NW64, E1C625, P0CB05, E1BW90	431	39	10057	2.99155	1	0.722895	70.0033
GOTERM_BP_DIRECT	GO:0008285~negative regulation of cell proliferation	12	2.13523	0.0840579	R9PXM9, A0A1D5NTL9, E1C066, Q5ZI70, F1P568, Q9PWE8, F1NP26, P83038, E1BVM2, E1BQY3, A0A1D5PXB5, E1C837, A0A1D5NV71, A0A1D5P775, Q7T2H2	414	150	8994	1.73797	1	0.961637	77.0983
GOTERM_MF_DIRECT	GO:0044212~transcription regulatory region DNA binding	7	1.24555	0.0869171	A0A167VDT2, F1NWA0, A0A1D5NXI5, Q9DEB6, E1C1W0, A0A1D5PE92, A0A1D5NTG3	361	73	8532	2.26631	1	0.681034	71.5591
GOTERM_BP_DIRECT	GO:0048844~artery morphogenesis	3	0.533808	0.0879661	F1NFB5, A0A1L1RZA5, F1NV02	414	11	8994	5.9249	1	0.964685	78.6847
GOTERM_BP_DIRECT	GO:0048745~smooth muscle tissue development	3	0.533808	0.0879661	A0A167VDT2, F1N973, F1NY57	414	11	8994	5.9249	1	0.964685	78.6847
GOTERM_BP_DIRECT	GO:0043488~regulation of mRNA stability	3	0.533808	0.0879661	F1NV23, A0A1D5P778, F1NTY0	414	11	8994	5.9249	1	0.964685	78.6847
GOTERM_MF_DIRECT	GO:0017056~structural constituent of nuclear pore	3	0.533808	0.0886441	A0A1D5PXQ1, A0A1L1RVY5, F1NPS0	361	12	8532	5.90859	1	0.676589	72.294
GOTERM_BP_DIRECT	GO:0001838~embryonic epithelial tube formation	2	0.355872	0.0897353	A0A1L1RML1, P49337	414	2	8994	21.7246	1	0.964554	79.3682
GOTERM_BP_DIRECT	GO:0061005~cell differentiation involved in kidney development	2	0.355872	0.0897353	F1NYG9, A0A1D5P775	414	2	8994	21.7246	1	0.964554	79.3682
GOTERM_BP_DIRECT	GO:0036228~protein targeting to nuclear inner membrane	2	0.355872	0.0897353	A0A1L1RVY5, F1NPS0	414	2	8994	21.7246	1	0.964554	79.3682
GOTERM_BP_DIRECT	GO:0033277~abortive mitotic cell cycle	2	0.355872	0.0897353	Q90687, F1N843	414	2	8994	21.7246	1	0.964554	79.3682
GOTERM_BP_DIRECT	GO:0003365~establishment of cell polarity involved in ameboidal cell migration	2	0.355872	0.0897353	E1C5Z2, A0A1D5P206	414	2	8994	21.7246	1	0.964554	79.3682
GOTERM_CC_DIRECT	GO:0048471~perinuclear region of cytoplasm	16	2.84698	0.0937983	Q5ZJK3, F1NV23, Q5ZL19, Q5ZI20, F1N8N7, A0A1D5PZ01, E1C625, F1NYG9, F1P0S2, F1NIE8, E1BVM2, Q5ZK19, Q5ZM26, F1NE32, A0A1D5NV71, Q5ZMP2	431	241	10057	1.54915	1	0.750992	74.2457
GOTERM_MF_DIRECT	GO:0008270~zinc ion binding	37	6.58363	0.0948503	A0A1D5PXQ1, Q98934, E1BVH0, E1BVY1, E1BY42, P83038, E1BRG3, A0A1D5PLW9, E1C2G3, F1N973, E1C7R9, E1BV31, A0A1D5NWT1, E1BSS0, P53413, E1C214, F1NME8, F1NIT2, F1P1F3, E1C3M0, F1P0K3, A0A1D5PSM7, F1NLJ7, F1NB68, F1P2F7, F1NFB5, A0A1D5PIB1, F1NP26, Q8JHU1, A0A1D5PDJ5, E1BZI9, F1NT94, P50211, E1C3S2, F1NYR2, A0A1D5PCU3, E1C0E8, F1NS44	361	681	8532	1.2841	1	0.69089	74.792
GOTERM_BP_DIRECT	GO:0048813~dendrite morphogenesis	4	0.711744	0.0953978	F1N8N7, F1NI11, E1BVH0, Q5ZKM0	414	24	8994	3.62077	1	0.969366	81.4202
GOTERM_CC_DIRECT	GO:0000932~cytoplasmic mRNA processing body	5	0.88968	0.0965773	A0A1D5P778, Q5ZKB9, F1NAU7, A0A1D5NZF2, E1BZI9	431	41	10057	2.84562	1	0.748554	75.3125
GOTERM_MF_DIRECT	GO:0000981~RNA polymerase II transcription factor activity, sequence-specific DNA binding	8	1.42349	0.0972539	A0A1D5P1Y1, E1C135, A0A1D5PLW4, E1C4U8, F1NY57, F1NXG3, P10157, E1C7U9	361	93	8532	2.03306	1	0.689279	75.702

## Sheet: Gga-Cat2
Category	Term	Count	%	PValue	Genes	List Total	Pop Hits	Pop Total	Fold Enrichment	Bonferroni	Benjamini	FDR
UP_KEYWORDS	Coiled coil	36	26.2774	2.56044e-06	F1NB79, A0A1D5NWV4, A0A1D5NTL9, Q5ZIZ5, E1BZQ5, A0A1D5P8I3, F1NBD8, E1BY08, A0A1D5PLD2, B6UV99, F1NJJ8, F1N9Y2, F1N8T0, E1BU31, E1BVP9, A0A1D5PFG2, A0A1D5PFI3, A0A1D5P000, E1C0J0, Q5ZLC2, A0A1D5PKL6, A0A1L1RMT7, F1N8N1, E1BSG7, E1C250, O73700, R4GJL4, F1NHR6, F1NY57, F1N8C9, A0A1D5NVH3, A0A1D5P919, F1N9T8, F1NQY0, A0A1D5NXI5, E1C3B3, F1P3K6	108	1728	11626	2.24267	0.000225294	0.000225294	0.00277333
GOTERM_BP_DIRECT	GO:0006355~regulation of transcription, DNA-templated	11	8.0292	0.00345121	A0A1D5NWV4, Q5ZLC2, Q5ZIZ5, A0A1D5NTL9, O42108, A0A1D5P8I3, A0A1D5NXI5, F1NCY8, Q9I9R0, F1N9P6, A0A1D5PV61	90	370	8994	2.97099	0.733958	0.733958	4.67863
GOTERM_MF_DIRECT	GO:0003682~chromatin binding	8	5.83942	0.00352982	F1NB79, Q5ZIZ5, A0A1D5NTL9, A0A1D5P8I3, A0A1D5PKY6, F1NE59, F1NE18, A0A1D5PV61	81	211	8532	3.99368	0.312589	0.312589	3.89014
GOTERM_CC_DIRECT	GO:0005634~nucleus	30	21.8978	0.00364729	F1NB79, A0A1D5NWV4, Q5ZIZ5, A0A1D5NTL9, A0A1D5P8I3, E1BZK0, B6UV99, F1N9Y2, O93582, F1NXG9, O42108, E1BU31, F1P3U3, Q8UVG3, F1NE18, Q5ZLC2, F1P2L8, A0A1D5PXT4, A0A1D5PPD3, F1NY57, A0A1D5P919, F1NCY8, F1N9P6, A0A1D5PV61, F1NBI4, F1NU06, F1NJI2, F1NP42, F1NJM1, A0A1D5NXI5	95	1905	10057	1.66714	0.335847	0.335847	4.05744
GOTERM_CC_DIRECT	GO:0016363~nuclear matrix	4	2.91971	0.00744804	Q5ZIZ5, A0A1L1RMT7, A0A1D5P8I3, A0A1D5PV61	95	43	10057	9.84774	0.567123	0.342066	8.12538
GOTERM_CC_DIRECT	GO:0000785~chromatin	4	2.91971	0.0106813	A0A1D5P8I3, F1NTQ0, A0A1D5P326, F1N9P6	95	49	10057	8.64189	0.699631	0.330292	11.4615
GOTERM_CC_DIRECT	GO:0016605~PML body	4	2.91971	0.0125581	E1BUN6, A0A1D5PPD3, F1NC77, A0A1D5PV61	95	52	10057	8.14332	0.757175	0.298022	13.3469
GOTERM_MF_DIRECT	GO:0000976~transcription regulatory region sequence-specific DNA binding	3	2.18978	0.0133895	Q5ZIZ5, A0A1D5P8I3, F1N9P6	81	19	8532	16.6316	0.760422	0.510533	14.0375
GOTERM_MF_DIRECT	GO:0001227~transcriptional repressor activity, RNA polymerase II transcription regulatory region sequence-specific binding	3	2.18978	0.0226554	F1NB79, A0A1D5P8S9, A0A1D5PV61	81	25	8532	12.64	0.911883	0.555007	22.6741
GOTERM_CC_DIRECT	GO:0005730~nucleolus	9	6.56934	0.0307613	F1NXQ1, A0A1D5PXT4, F1NJM1, F1NQY0, A0A1D5PKY6, A0A1D5P8S9, B6UV99, F1NC77, F1NV53	95	394	10057	2.41819	0.969784	0.503353	29.8251
GOTERM_BP_DIRECT	GO:0042297~vocal learning	2	1.45985	0.0390047	F1NY57, E1BZK0	90	4	8994	49.9667	1	0.999509	42.3872
GOTERM_MF_DIRECT	GO:0000980~RNA polymerase II distal enhancer sequence-specific DNA binding	3	2.18978	0.0491114	Q5ZIZ5, A0A1D5P8I3, A0A1D5PKY6	81	38	8532	8.31579	0.995194	0.736709	43.1681
GOTERM_CC_DIRECT	GO:0042382~paraspeckles	2	1.45985	0.0547994	Q5ZIZ5, A0A1D5P8I3	95	6	10057	35.2877	0.998186	0.650768	47.2108
GOTERM_CC_DIRECT	GO:0097539~ciliary transition fiber	2	1.45985	0.0636392	A0A1L1RMT7, A0A1D5PFI3	95	7	10057	30.2466	0.999367	0.650786	52.5445
GOTERM_CC_DIRECT	GO:0005737~cytoplasm	26	18.9781	0.0641451	A0A1D5PL72, A0A1D5PJE1, F1NBD8, E1BZK0, Q9I9R0, B6UV99, F1N9Y2, F1NV53, F1P1T2, E1BUN6, F1N8F2, A0A1L1RMT7, F1P2L8, A0A1D5PXT4, E1BSG7, A0A1D5PPD3, Q5ZHN4, A0A1D5P8S9, A0A1D5P919, F1NI55, A0A1D5P7X1, F1NP42, F1NBI4, F1NJM1, A0A1D5NXI5, Q0ZM14	95	1984	10057	1.38732	0.999404	0.604707	52.8344
GOTERM_BP_DIRECT	GO:0001843~neural tube closure	3	2.18978	0.0646016	A0A1D5NWV4, A0A1D5PKY6, B6UV99	90	42	8994	7.1381	1	0.999802	60.3707
GOTERM_BP_DIRECT	GO:0010389~regulation of G2/M transition of mitotic cell cycle	2	1.45985	0.0672674	A0A1L1RMT7, F1NJI2	90	7	8994	28.5524	1	0.998729	61.9077
GOTERM_BP_DIRECT	GO:0060013~righting reflex	2	1.45985	0.0765045	F1NY57, Q0ZM14	90	8	8994	24.9833	1	0.997749	66.8159
GOTERM_CC_DIRECT	GO:0005814~centriole	3	2.18978	0.0793312	Q5ZHN4, E1BZK0, E1BZ70	95	50	10057	6.35179	0.999905	0.642491	60.8182
UP_KEYWORDS	S-adenosyl-L-methionine	3	2.18978	0.0910211	A0A1D5NWV4, Q5F484, F1NJM1	108	55	11626	5.87172	0.999775	0.98499	64.431
GOTERM_BP_DIRECT	GO:0000398~mRNA splicing, via spliceosome	3	2.18978	0.0934609	Q5ZIZ5, F1NHR6, F1P1G7	90	52	8994	5.76538	1	0.998095	74.3326
GOTERM_CC_DIRECT	GO:0030057~desmosome	2	1.45985	0.0981879	E1C2V3, A0A1D5PFI3	95	11	10057	19.2478	0.999991	0.685732	69.0112

## Sheet: Gga-Cat3
Category	Term	Count	%	PValue	Genes	List Total	Pop Hits	Pop Total	Fold Enrichment	Bonferroni	Benjamini	FDR
UP_KEYWORDS	Coiled coil	41	25.1534	0.000114756	F1NPV4, Q5F3Y0, R9PXQ8, E1C8S5, A0A1D5P8I3, E1C530, F1P1R2, E1BXS1, E1BY42, A0A1D5PB27, F1NHL0, E1BSP2, E1BWW3, F1NLZ2, E1BWM0, E1C8T8, A0A1D5PSQ9, F1P542, E1C9D7, A0A1D5PL93, A0A1D5PPB2, E1C3K2, A0A1D5P000, A0A1D5PRW0, E1C250, A0A1L1RRB7, F1P0I3, F1NDM5, F1NM59, F1N8A6, E1C3R6, E1C2F1, E1BR49, A0A1D5PTW0, Q1G7G9, F1NAH9, E1C1Y9, F1NGR2, E1C4Y2, F1NRH7, F1NK46	151	1728	11626	1.82681	0.0142429	0.0142429	0.132625
GOTERM_CC_DIRECT	GO:0005654~nucleoplasm	24	14.7239	0.00103395	E1C6S7, F1P0W6, A0A1D5PBY4, F1NDM5, F1NFB8, F1P1R2, Q5ZK82, P24342, F1P0X4, E1BTL2, F1NRP9, E1C3R6, F1NMF0, F1NB13, F1NTX9, E1C2F1, A0A1D5P447, Q5ZJL9, A0A1D5PTW0, F1P0F6, E1C3Q9, Q8AWW1, E1C3K2, A0A1D5PRW0	126	932	10057	2.05539	0.116742	0.116742	1.1805
GOTERM_MF_DIRECT	GO:0003723~RNA binding	9	5.52147	0.0017506	Q5ZJL9, E1C0L7, A0A1D5PKQ5, F1P0I3, F1P1R2, A0A1L1RJI4, F1NM59, F1NRP9, F1NXG9	100	193	8532	3.97865	0.237826	0.237826	2.08221
GOTERM_MF_DIRECT	GO:0044822~poly(A) RNA binding	16	9.81595	0.00396256	F1P4R6, F1NXQ1, A0A1D5P8I3, F1P0I3, F1P1R2, F1NTK9, A0A1D5P778, A0A1D5PTW0, F1NHV1, Q5ZHK9, A0A1L1RJI4, A0A1D5PEJ1, A0A1L1S091, Q5ZLB0, A0A1D5P000, F1NK46	100	605	8532	2.2564	0.459585	0.264871	4.65635
GOTERM_CC_DIRECT	GO:0005814~centriole	4	2.45399	0.0240434	Q1G7G9, E1C8S5, F1NGR2, E1BSP2	126	50	10057	6.3854	0.946091	0.767817	24.3743
GOTERM_CC_DIRECT	GO:0005730~nucleolus	11	6.74847	0.0247655	F1P4R6, E1C2F1, F1NXQ1, F1NIH3, E1C8T8, F1NHV1, Q5ZHK9, F1P1R2, F1NTK9, Q5ZLB0, F1NMF0	126	394	10057	2.22841	0.950673	0.633257	25.0142
GOTERM_CC_DIRECT	GO:0005813~centrosome	8	4.90798	0.0276868	F1P3H8, Q1G7G9, F1P3W6, E1C530, A0A1D5PL93, E1C3K2, A0A1D5PPB2, A0A1D5PRW0	126	236	10057	2.70568	0.965585	0.569289	27.5525
GOTERM_BP_DIRECT	GO:0000462~maturation of SSU-rRNA from tricistronic rRNA transcript (SSU-rRNA, 5.8S rRNA, LSU-rRNA)	3	1.84049	0.0277988	F1P4R6, F1NHV1, A0A1D5P000	119	20	8994	11.337	0.999994	0.999994	32.7554
GOTERM_BP_DIRECT	GO:0000724~double-strand break repair via homologous recombination	4	2.45399	0.0320778	E1C2F1, A0A1D5P8I3, F1NTX9, E1BWW3	119	53	8994	5.70414	0.999999	0.999036	36.8036
GOTERM_CC_DIRECT	GO:0032040~small-subunit processome	3	1.84049	0.0327041	E1C8T8, F1NHV1, A0A1D5P000	126	23	10057	10.411	0.981502	0.54978	31.7298
GOTERM_BP_DIRECT	GO:0010501~RNA secondary structure unwinding	3	1.84049	0.0484049	F1P0I3, F1NTK9, Q5ZLB0	119	27	8994	8.39776	1	0.999129	50.261
GOTERM_CC_DIRECT	GO:0030141~secretory granule	3	1.84049	0.050022	A0A1D5P2R3, F1NNU1, F1NLZ2	126	29	10057	8.25698	0.997883	0.64168	44.5161
GOTERM_MF_DIRECT	GO:0000049~tRNA binding	3	1.84049	0.0527739	F1P0F6, E1BY42, F1NMF0	100	32	8532	7.99875	0.999776	0.939265	47.8537
GOTERM_MF_DIRECT	GO:0004004~ATP-dependent RNA helicase activity	3	1.84049	0.0782329	F1P0I3, F1NTK9, Q5ZLB0	100	40	8532	6.399	0.999997	0.957433	62.4056
GOTERM_BP_DIRECT	GO:0007601~visual perception	4	2.45399	0.0801727	E1C1F4, F1NZF1, Q9W7C6, F1NQG0	119	77	8994	3.92623	1	0.999864	69.1585
GOTERM_BP_DIRECT	GO:0007275~multicellular organism development	6	3.68098	0.0846079	A0A0D9SEG7, F1NHV1, E1C3Q9, A6N7Y9, P24342, E1BSP2	119	178	8994	2.54763	1	0.999464	71.187
GOTERM_BP_DIRECT	GO:0030324~lung development	3	1.84049	0.0884218	Q703P0, Q9W7C6, E1C9D7	119	38	8994	5.96683	1	0.998602	72.8315
GOTERM_BP_DIRECT	GO:0007160~cell-matrix adhesion	3	1.84049	0.09649	A0A1D5PJ08, A0A1D5NY33, F1NSQ3	119	40	8994	5.66849	1	0.997919	76.0272

## Sheet: Dre-Cat1
Category	Term	Count	%	PValue	Genes	List Total	Pop Hits	Pop Total	Fold Enrichment	Bonferroni	Benjamini	FDR
UP_KEYWORDS	Coiled coil	316	32.3108	4.37377e-49	F1R446, F1Q9K1, Q6NWC9, Q5RIV1, F1QXR3, E7FEM8, A5WUN7, E7FAB6, A0A0R4I9I4, Q6PE21, F6P0E6, F1R651, B0S5H0, E7F065, C5J7W8, F1QS48, E7F186, A0A0R4IGM2, B0UY40, B3DKN1, F1QAE1, B8JL46, E9QEX7, A0A0R4IVJ5, F1QS51, B8A4N9, A0A0A0MPL4, F1Q4X8, F1QUC5, Q1MT43, B0UYE9, F1Q5X0, F1QQ50, E7EZM2, F1Q8E5, E7F513, E7F789, F1RBF5, Q5RGW0, X1WCA2, A0A0R4IRV6, F8W411, F1R3Q3, Q5TYR3, A8WI00, F1QZ57, F1R839, F1R…	971	3222	22487	2.2713	9.09743e-47	9.09743e-47	5.51726e-46
GOTERM_CC_DIRECT	GO:0005634~nucleus	236	24.1309	1.28961e-24	F1Q9K1, E9QHZ7, Q5RIV1, F1RE03, F1QEW3, F1R0J2, Q8JFE3, C5J7W8, F1QS48, A0A0R4IGM2, B0S576, F1QDM3, F1QAE1, E9QEX7, P83758, A2BGL0, F1QUC5, Q5RIW8, F1R4T3, A2A121, F1QI01, F1Q8E5, Q8AXV6, F1Q7J8, Q1LXH3, A0A0R4IRV6, P53405, Q8JFT7, F1QKM6, F8W411, P53406, Q1ECZ4, F1Q9H9, F1QE20, E7F165, A2CF54, E7FAA3, F1QB53, Q9PWM6, F1QVQ9, I3ISM5, E7FGP3, A5WVQ0, E7FH14, F1QYS9, A5PLE8, A4QNU9, F1Q5Z1, F1RE13,…	657	2933	15208	1.86254	3.71408e-22	3.71408e-22	1.71258e-21
GOTERM_BP_DIRECT	GO:0006355~regulation of transcription, DNA-templated	137	14.0082	2.67484e-19	Q5RIV1, E7FEM8, F1R0J2, P79746, Q8JFE3, F1QAV3, F1QS48, F1QQZ3, Q802Z5, B0S576, F1QFN7, F1QDM3, A5WWE3, B0S8H2, Q6W2J8, E9QEX7, F6NI81, P83758, F1QUC5, Q5RIW8, B3DGV3, F1QI01, F1QDF2, Q8UVK2, F6NIQ9, F1QL52, Q8AXV6, F1Q7J8, Q1LXH3, A0A0R4IJ07, P53405, Q1L8R2, P53406, F1R6M2, Q7ZVX7, Q8JIG3, Q1L8R8, F6NKE2, F1QE20, F1QGF8, Q9PWM6, A2CEM8, F1QVQ9, E7FGP3, E7FH14, Q4U3K9, A0A0R4ICZ3, F1QRR4, B3DFT3,…	708	1310	14912	2.20268	2.84603e-16	2.84603e-16	4.25958e-16
GOTERM_MF_DIRECT	GO:0003677~DNA binding	123	12.5767	1.90926e-15	F1Q9K1, Q5RIV1, Q6DHN2, F1QGS2, A1L287, P79746, F2Z4S1, Q8JFE3, F6PCB5, F1QS48, B0S576, K7DY74, F1QFN7, F1QDM3, F1QAE1, F6NI81, P83758, F1QI01, A7MCR5, Q8UVK2, F1QL52, Q8AXV6, Q1LXH3, P53405, A3KPX4, E7FDC5, P53406, F1R6M2, Q7ZVX7, F1R019, F1QXL1, Q8JIG3, Q1L8R8, F6NKE2, F1QE20, E7F165, F1QGF8, Q1ED17, Q9PWM6, A2CEM8, F1QVQ9, E7FGP3, Q4U3K9, B3DFT3, F1QYS9, A5PLE8, F8W3I2, F1Q819, F1Q6P5, E7FCF7,…	665	1393	15797	2.09752	1.22868e-12	1.22868e-12	2.81997e-12
UP_KEYWORDS	Nucleus	139	14.2127	7.77195e-13	B0S8I3, F1Q9K1, Q5RIV1, Q6P5J9, F1R0J2, P79746, F1QH50, F2Z4S1, Q8JFE3, Q9I9N5, F1QS48, B0S576, A0A0R4IGM2, F1QFN7, F1QDM3, E7FEV4, Q08BR1, F6NI81, P83758, F1QUC5, Q5RIW8, B3DGV3, F1QI01, Q8UVK2, F1R8L7, Q8AXV6, F1Q7J8, Q1LXH3, A0A0R4IJ07, P53405, A0A0R4IW61, P53406, F1R6M2, A0A0R4IB26, P0CH95, Q8JIG3, Q1ECZ4, Q1L8R8, F6NKE2, F1QE20, F1QGF8, Q9PWM6, F1QVQ9, E7FGP3, A5WVQ0, Q4U3K9, A0A0R4ICZ3, B3D…	971	1726	22487	1.86503	1.61648e-10	8.08242e-11	9.80338e-10
GOTERM_MF_DIRECT	GO:0043565~sequence-specific DNA binding	66	6.74847	1.17475e-11	Q90VY7, Q91430, O42368, F1QS04, A0A1D5NSQ7, A0A0R4IKW7, Q4JNX5, P79746, E7FFR4, Q5BJ08, O42370, Q8JFE3, Q90X27, Q9I9B4, F1QS48, L0ANA2, K7DY74, B0S576, F1QFN7, F6NI81, P83758, B3DKL9, A5WW89, Q91994, F1QTW3, F1R982, Q4L1M6, F1QDF2, F6NIQ9, E7F138, A2BGM5, P53405, Q8JI10, P53406, Q8AWZ2, F1R6M2, F1R8Z9, Q7ZVX7, Q91981, A0A0G2KUW7, Q6DG75, F1QLY4, F6NKE2, F1QI36, E7F226, A2CEM8, Q9PWM6, B0S5T0, F1Q…	665	625	15797	2.50852	7.64762e-09	3.82381e-09	1.75438e-08
UP_KEYWORDS	Transcription regulation	67	6.85072	4.07495e-11	F1QA30, O42368, Q5RIV1, Q91430, F1QFA6, F1QS04, F1R0J2, P79746, F1R041, F1QMF7, O42370, F1QGP2, A4QP78, Q8JFE3, F1QS48, L0ANA2, F1QDM3, P83758, Q5RGA4, F1QUC5, Q5RIW8, F1R685, F1QI01, F1QTW3, Q8UVK2, Q8AXV6, A2BGM5, F1Q7J8, Q1LXH3, A0A0R4IJ07, Q8JI10, Q1LYE3, Q6DH26, Q8AWZ2, F1R6M2, F1R8Z9, P0CH95, F1R739, F1QZ88, Q8JIG3, Q1L8R8, F1QLY4, F1QE20, F1QGF8, Z4YI11, Q9PWM6, A8HAL1, F1QVQ9, A0A0R4ICZ3,…	971	636	22487	2.43966	8.4759e-09	2.8253e-09	5.14032e-08
UP_KEYWORDS	Transcription	70	7.15746	4.53113e-11	F1QA30, Q91430, O42368, Q5RIV1, F1QFA6, F1QS04, Q4JNX5, F1R0J2, P79746, F1R041, F1QMF7, O42370, F1QGP2, A4QP78, Q8JFE3, F1QS48, L0ANA2, F1QDM3, P83758, Q5RGA4, F1QUC5, Q5RIW8, F1R685, F1QI01, F1QTW3, Q8UVK2, Q8AXV6, A2BGM5, F1Q7J8, Q1LXH3, A0A0R4IJ07, Q8JI10, Q1LYE3, Q6DH26, Q8AWZ2, F1R6M2, F1R8Z9, P0CH95, F1R739, F1QZ88, Q8JIG3, Q1L8R8, F1QLY4, F1QE20, F1QGF8, Z4YI11, Q9PWM6, A8HAL1, F1QVQ9, A0A…	971	682	22487	2.37698	9.42475e-09	2.35619e-09	5.71576e-08
GOTERM_MF_DIRECT	GO:0003700~transcription factor activity, sequence-specific DNA binding	66	6.74847	1.49967e-10	Q91430, O42368, Q5RIV1, F1QS04, A0A1D5NSQ7, Q4JNX5, F1QGS2, P79746, E7FFR4, F2Z4S1, F1R041, Q6DH99, F1QSH8, F1QMF7, O42370, Q8JFE3, Q1LWL8, Q90X27, Q9I9B4, F1QS48, L0ANA2, B0S576, E9QEX7, P83758, E7F9Z5, F1QI01, E7FFQ2, Q91994, F1Q8E5, F1R982, Q8UVK2, F1QDF2, F6NIQ9, E7F138, A2BGM5, A0A0R4IRV6, Q1L887, Q8AWZ2, F1R6M2, F1R8Z9, Q7ZVX7, E7FBZ0, Q91981, F1QZ88, Q6DG75, Q8JIG3, Q1L8R8, F1QLY4, F1QI36,…	665	663	15797	2.36474	9.76283e-08	3.25428e-08	2.23961e-07
GOTERM_BP_DIRECT	GO:0006351~transcription, DNA-templated	75	7.66871	1.1215e-09	F1QA30, Q91430, O42368, Q5RIV1, F1QFA6, A0A1D5NSQ7, F1QS04, F1R0J2, Q4JNX5, P79746, F1R041, F1QMF7, O42370, F1QGP2, A4QP78, Q8JFE3, F1QS48, L0ANA2, F1QDM3, P83758, Q5RGA4, F1QUC5, Q5RIW8, F1R685, F1QI01, F1QTW3, Q8UVK2, Q8AXV6, A2BGM5, F1Q7J8, Q1LXH3, A0A0R4IJ07, Q8JI10, Q1LYE3, A3KPX4, Q6DH26, Q8AWZ2, F1R6M2, F1R8Z9, P0CH95, F1R739, F1QZ88, Q8JIG3, M9MM95, Q1L8R8, F1QLY4, F1QE20, A2CF54, F1QGF8,…	708	747	14912	2.11467	1.19327e-06	5.96637e-07	1.78594e-06
UP_KEYWORDS	DNA-binding	83	8.48671	1.27441e-09	Q90VY7, F1QA30, Q91430, O42368, Q5RIV1, F1QS04, Q4JNX5, P79746, F2Z4S1, F1R041, F1QMF7, Q5BJ08, O42370, Q8JFE3, Q1LWL8, Q9I9B4, L0ANA2, F1QS48, F1QFN7, F1QDM3, F1QAE1, F6NI81, P83758, Q5RGA4, A5WW89, B3DKL9, F1R685, F1QI01, Q91994, F1QTW3, Q4L1M6, F1R982, Q6NY74, Q8AXV6, E7F138, A2BGM5, Q1LXH3, P53405, Q8JI10, Q1LYE3, E7FDC5, P53406, Q8AWZ2, F1R6M2, F1R8Z9, Q7ZVX7, Q91981, A0A0G2KUW7, F1QZ88, Q6D…	971	944	22487	2.03619	2.65076e-07	5.30153e-08	1.60759e-06
GOTERM_CC_DIRECT	GO:0005643~nuclear pore	13	1.32924	5.02859e-08	Q8JFT7, B0S8I3, B0S5C8, F1QEW3, E9QFS6, F1QPP5, Q6NYN9, F1R2H0, Q5RI09, F1R606, F1Q953, F1RDC5, F1QB53	657	39	15208	7.71588	1.44822e-05	7.24114e-06	6.67787e-05
UP_KEYWORDS	Homeobox	34	3.47648	1.17945e-06	P53405, Q8JI10, Q90VY7, O42368, P53406, Q8AWZ2, Q91981, P79746, F2Z4S1, O42370, A0A0G2KUW7, Q5BJ08, F6NKE2, Q9I9B4, Q9PWM6, F1QFN7, B0S5T0, F1QAE1, E7FGP3, B3DGA5, B3DFT3, F1QYS9, F6NI81, A5PLE8, F1Q6P5, B3DKL9, A5WW89, E7FCF7, B3DH68, Q91994, A0A0R4ISP1, F1QTW3, F1R982, Q4L1M6	971	304	22487	2.59011	0.000245296	4.08868e-05	0.0014878
UP_KEYWORDS	Activator	22	2.24949	1.77111e-06	A8HAL1, F1QDM3, Q1LYE3, F1QS04, Q6DH26, F1Q6L6, Q5RGA4, F1R0J2, F1R8Z9, Q5RIW8, P0CH95, F1R739, Q9YHE8, F1QGP2, F1QZ88, E7F5J8, Q8JFE3, F1QLC4, Q6IQ63, F1RC21, Q5RJ20, F1Q7J8	971	149	22487	3.41939	0.000368323	5.26259e-05	0.00223413
GOTERM_MF_DIRECT	GO:0004843~thiol-dependent ubiquitin-specific protease activity	11	1.12474	3.38357e-06	Q08BW0, E7EZD6, A0A0R4IB93, A8HAL1, A0A0R4ITP2, E7FCR5, X1WEZ5, Q5RGA4, F1RBY0, A3KQS4, E7F165	665	39	15797	6.7001	0.00220028	0.000550525	0.00505293
GOTERM_MF_DIRECT	GO:0003713~transcription coactivator activity	14	1.43149	4.22144e-06	A8HAL1, B0S8H2, Q6DH26, A0A0R4IPF3, Q5RGA4, A0A0R4IKI2, F1QN94, Q5TYT6, E7FBZ0, F1QAN3, E7FFQ2, E7F5J8, E9QDE2, B8A4R6	665	68	15797	4.89071	0.00274439	0.000549481	0.00630414
GOTERM_BP_DIRECT	GO:0006357~regulation of transcription from RNA polymerase II promoter	31	3.16973	9.72784e-06	A0A0R4IRV6, F1QKM6, Q6DH26, F1R9C9, Q7ZVX7, P79746, F2Z4S1, F1QMF7, A0A0G2KUW7, F1R739, F1QGP2, Q6NWH7, E7FFZ4, L0ANA2, A2CEM8, R4GDN4, E7FGP3, B8A5G8, A0A0R4ICZ3, A5PF33, A5PLE8, F1QN94, E7EZ03, Q9YHE8, F1QI01, Q7T351, U3JAU7, F1QN70, F1Q8E5, Q6IQ63, Q8UVK2	708	266	14912	2.45461	0.0102971	0.00344421	0.0154901
GOTERM_BP_DIRECT	GO:0016579~protein deubiquitination	13	1.32924	3.38094e-05	Q08BW0, A0A0R4IB93, E7EZD6, F1Q6K1, A0A0R4IPU7, A0A0R4ITP2, E7FCR5, E9QG68, F1RBA1, E7F165, F8W4Z8, A0A0R4IFT8, F1QUS9	708	63	14912	4.34616	0.0353344	0.00895313	0.0538265
GOTERM_MF_DIRECT	GO:0046983~protein dimerization activity	21	2.14724	4.76382e-05	A0A0R4IRV6, F1QVQ9, Q5RIV1, Q4U3K9, E7FEM8, Q6TA36, F1RDU4, F2Z4S1, F1QMF7, E7F5J8, Q1LWL8, Q8JIG3, M9MM95, Q6NY50, F1QC71, Q8AXV6, F1RC21, F1QE20, A0A0R4IX50, Q6QB00, Q1LXH3	665	175	15797	2.85059	0.0305372	0.00515553	0.0711196
GOTERM_BP_DIRECT	GO:0045893~positive regulation of transcription, DNA-templated	16	1.63599	7.89449e-05	A8HAL1, Q1LYE3, F1QVQ9, Q5RIV1, E7FEM8, A5PLE8, N0A274, P0CH95, F2Z4S1, Q6NWH7, E9QDE2, F1R982, M9MM95, F1QBS1, A2BGM5, L0ANA2	708	101	14912	3.33658	0.0805693	0.0166598	0.125643
GOTERM_MF_DIRECT	GO:0036459~thiol-dependent ubiquitinyl hydrolase activity	11	1.12474	8.48152e-05	Q08BW0, E7EZD6, A0A0R4IB93, F1Q6K1, A0A0R4IPU7, E7FCR5, E9QG68, F1RBA1, F8W4Z8, A0A0R4IFT8, F1QUS9	665	55	15797	4.75098	0.0537203	0.00785712	0.126589
GOTERM_MF_DIRECT	GO:0000149~SNARE binding	10	1.02249	8.83276e-05	Q7SZZ5, E7EY87, Q7T361, A0A0A0MPL4, A5PMJ7, E7EXN4, Q567Y3, A2AV37, Q6IQK3, Q7SXP0	665	45	15797	5.27886	0.0558817	0.00716221	0.131828
GOTERM_MF_DIRECT	GO:0008139~nuclear localization sequence binding	7	0.715746	0.000126028	Q8JFT7, A0A0R4IVZ0, F1R2H0, F1R606, F1QEW3, B8JHR9, F1QB53	665	20	15797	8.31421	0.0787734	0.00907516	0.188046
GOTERM_BP_DIRECT	GO:0006606~protein import into nucleus	9	0.920245	0.000227712	Q8JFT7, A0A0R4IVZ0, F1R2H0, Q5RI09, Q6P5J9, F1Q953, F1R606, F1QEW3, F1QB53	708	36	14912	5.26554	0.21519	0.0395809	0.362007
UP_KEYWORDS	Cell cycle	17	1.73824	0.00033372	A0A0R4IGM2, A8HAL1, A5WWB6, F1QDM3, F1QCU5, Q7SXL7, A0A0R4IU07, P0CH95, F1R041, B0S729, Q3LGD4, Q2KN93, Q5RII9, F1QZ88, Q8JFE3, E9QIC1, F1QY75	971	139	22487	2.83235	0.0670703	0.00864063	0.420154
GOTERM_MF_DIRECT	GO:0004407~histone deacetylase activity	6	0.613497	0.00038348	Q7ZZ36, E7FH14, F1QRR4, F1QUC5, B8JJJ1, E7F0R9	665	16	15797	8.90808	0.22096	0.0246602	0.571165
GOTERM_MF_DIRECT	GO:0003723~RNA binding	36	3.68098	0.00040125	A0A0R4IW61, F1QXP8, A5WWH4, Q4QRG0, X2BQ53, Q6P5J9, F1QUB8, F1QZ57, A0A0R4J8E6, Q90X41, E7EYA8, F1QSU2, F1QH50, F1Q949, A0A0B4J1A6, Q7ZUG6, Q1ECZ4, Q76LC6, E9QJ33, Q6P0B1, I3ISM5, E7FEV4, B8JL46, Q802Z0, B5DE31, A0A0R4I9C3, A2BGL0, F1Q6L6, F1QUN2, Q6NV05, A9C3V8, F1QPP5, Q9IBD1, F8W3D4, A0A0R4IY44, F1QBS4, F1RD88	665	453	15797	1.88781	0.229924	0.0234716	0.597557
UP_KEYWORDS	Repressor	15	1.53374	0.00043543	Q8JI10, Q6P0B1, F1QDM3, F1R041, F1QI01, F1QH25, Q9YHE8, E7FEV4, F1QZ88, E7FH14, F1QRR4, F1QA30, F1QFA6, Q8AXV6, F1QUC5, Q6QB00	971	115	22487	3.02069	0.0866071	0.010015	0.547883
GOTERM_BP_DIRECT	GO:0006511~ubiquitin-dependent protein catabolic process	15	1.53374	0.000520053	A0A0R4IZ33, E7EZD6, A8HAL1, F1Q6K1, E9QG68, E7FCR5, E7F6E1, F1RBA1, F1R1Z0, F8W4Z8, A0A0R4IB93, A0A0R4IPU7, F1Q5A9, A0A0R4IFT8, F1QUS9	708	107	14912	2.95264	0.425055	0.0760234	0.824958
GOTERM_BP_DIRECT	GO:0000122~negative regulation of transcription from RNA polymerase II promoter	16	1.63599	0.000651334	B0S576, E7FF48, Q7ZZ36, F1QAE1, Q1L887, F1QFA6, F8W3I2, F1Q6M9, B8JJJ1, F1R041, F1RBV9, F1QZ88, Q8JFE3, F6NIQ9, F1QXU7, E7F0R9	708	122	14912	2.76225	0.500049	0.0830071	1.0322
GOTERM_MF_DIRECT	GO:0005484~SNAP receptor activity	9	0.920245	0.000687125	Q7SZZ5, Q7T361, A0A0A0MPL4, A5PMJ7, E7EXN4, Q567Y3, Q6IQK3, Q7SXP0, F1Q5X0	665	47	15797	4.54881	0.360758	0.0366027	1.02126
GOTERM_MF_DIRECT	GO:0044212~transcription regulatory region DNA binding	11	1.12474	0.00125442	B0S576, F1QI01, Q9YHE8, Q8JFE3, F1QTW3, F1QDF2, E9QIC1, A0A0R4IKW7, E7F726, F1QI36, A0A0R4IKT3	665	76	15797	3.43821	0.558308	0.0609224	1.85708
GOTERM_CC_DIRECT	GO:0070847~core mediator complex	4	0.408998	0.00144897	F1R739, Q6DH26, F1R9C9, Q6IQ63	657	6	15208	15.4318	0.341379	0.129948	1.90718
GOTERM_BP_DIRECT	GO:0007049~cell cycle	18	1.84049	0.00177826	A0A0R4IGM2, A5WWB6, F1QDM3, F1QCU5, B8A5G8, F1QY72, A0A0G2KLX0, Q7SXL7, A0A0R4IU07, F1R041, B0S729, Q3LGD4, Q2KN93, Q5RII9, F1QZ88, Q8JFE3, E9QIC1, F1QY75	708	162	14912	2.34024	0.849494	0.189753	2.79454
GOTERM_MF_DIRECT	GO:0016874~ligase activity	17	1.73824	0.0019384	Q7T321, F1QX65, Q804S5, N0A274, F1Q9U6, A5WVY0, F1R041, A9JRZ0, F1QL68, A9JTG5, A0A0G2KGL2, F1QAW5, F1QIM8, A9C3S0, Q568F6, F1QVW1, F1QGC8	665	168	15797	2.40377	0.717231	0.0862727	2.85605
GOTERM_CC_DIRECT	GO:0031201~SNARE complex	9	0.920245	0.00206485	Q7SZZ5, Q7T361, A0A0A0MPL4, A5PMJ7, E7EXN4, Q567Y3, Q6IQK3, Q7SXP0, F1Q5X0	657	54	15208	3.85794	0.448597	0.138278	2.70758
GOTERM_CC_DIRECT	GO:0031410~cytoplasmic vesicle	9	0.920245	0.00364549	Q3LGD4, F1R5G5, F1QZJ9, A2AV37, Q566V9, F1RC21, Q804S5, A0A0R4ITX6, Q6P0C7	657	59	15208	3.531	0.650699	0.189711	4.73426
GOTERM_CC_DIRECT	GO:0005871~kinesin complex	9	0.920245	0.00364549	A0A0R4IM96, F1QH25, F1QV34, F1QK82, Q1LW14, Q08CF1, E7FDX9, A0A0R4IFA2, F1QPR6	657	59	15208	3.531	0.650699	0.189711	4.73426
GOTERM_CC_DIRECT	GO:0005654~nucleoplasm	9	0.920245	0.00364549	F1R7N4, Q8JFT7, B0UY40, F1R041, Q5XJM4, M9MM95, F1R606, F1QEW3, F1QB53	657	59	15208	3.531	0.650699	0.189711	4.73426
GOTERM_CC_DIRECT	GO:0005737~cytoplasm	127	12.9857	0.00377775	E7F8G5, A0A0R4IZ33, B0S8I3, Q5RIV1, E9QHZ7, A5WUN7, Q6P5J9, F1RE03, F1QEW3, F1R1Z0, Q1RM03, F1QH50, A4IGD2, Q8JFE3, F1QDV8, F1Q9Z1, Q9I9N5, F1QS48, A0A0R4ITX6, F1QTC6, F1RE85, E7FEV4, R4GEI9, A2A121, E7FCN8, F1QAW5, F1QGC8, A0A0R4IJ07, Q8JFT7, A0A0R4IW61, F1QCU5, B1NA68, Q804S5, A0A0R4IRV1, A0A0R4IB19, N0A274, F1QSU2, A0A0R4IB26, F1QR62, Q8JIG3, F1Q8Q4, F1QL68, Q1ECZ4, A0A0G2KGL2, X1WGA8, Q1L8R8,…	657	2335	15208	1.25899	0.663801	0.166128	4.90205
GOTERM_BP_DIRECT	GO:0048278~vesicle docking	6	0.613497	0.00389694	Q7T361, A0A0A0MPL4, A5PMJ7, E7EXN4, Q567Y3, A0A0R4IVY9	708	23	14912	5.49447	0.984305	0.339953	6.02849
GOTERM_CC_DIRECT	GO:0005856~cytoskeleton	25	2.55624	0.00401046	A0A0R4IIA7, F1QCU5, Q5TZ80, F1QKJ4, F1RBS8, F1Q4X8, A0A0R4IDZ8, A0A0R4IVY9, Q804S5, A0A0R4IB19, Q1RM03, Q7T2P8, F1Q6T9, F1QH25, Q2KN93, Q5RII9, E9QCV2, A0A0R4I9H0, Q9I9N5, A0A0R4II01, A0A0R4IXQ3, F8W425, A0A0R4IAS2, A1L1Q2, A0A0R4IB77	657	309	15208	1.87279	0.685677	0.152389	5.19662
UP_KEYWORDS	Ligase	14	1.43149	0.00410637	Q7T321, F1QX65, Q804S5, N0A274, F1Q9U6, F1R041, A5WVY0, A9JTG5, A0A0G2KGL2, F1QAW5, F1QIM8, Q568F6, F1QVW1, F1QGC8	971	130	22487	2.494	0.575092	0.0820279	5.0582
GOTERM_BP_DIRECT	GO:0046580~negative regulation of Ras protein signal transduction	5	0.511247	0.00449738	F1R3X3, A5PF31, E7F1U4, B1PBZ7, F1QX32	708	15	14912	7.02072	0.991737	0.353383	6.92649
GOTERM_BP_DIRECT	GO:0006607~NLS-bearing protein import into nucleus	5	0.511247	0.00449738	Q8JFT7, F1R606, F1QEW3, B8JHR9, F1QB53	708	15	14912	7.02072	0.991737	0.353383	6.92649
GOTERM_BP_DIRECT	GO:0016575~histone deacetylation	5	0.511247	0.00449738	Q7ZZ36, A5PF33, E7FH14, B8JJJ1, E7F0R9	708	15	14912	7.02072	0.991737	0.353383	6.92649
UP_KEYWORDS	Alternative splicing	17	1.73824	0.00452256	Q8JI10, Q5RFW2, Q08BW0, A0A0R4IW61, F1QCU5, Q6P0B1, E7FEV4, F1QUC5, Q5RIW8, A0A0R4IRG9, Q3LGD4, F1QGP2, Q6NZ07, E7EZ70, E7F5J8, Q6DHR8, Q8JGR7, F1R235	971	178	22487	2.21178	0.610475	0.0821411	5.5575
GOTERM_BP_DIRECT	GO:0045944~positive regulation of transcription from RNA polymerase II promoter	17	1.73824	0.00465248	K7DY74, B0S576, F1QAE1, Q4U3K9, F1QS04, A0A0R4IKI2, Q5RGA4, E7FBZ0, E7F726, F1QYY6, E7FFQ2, F1QZ88, E7F5J8, Q8JFE3, B8A4R6, F1QE20, Q1LXH3	708	163	14912	2.19667	0.993	0.338657	7.15714
GOTERM_BP_DIRECT	GO:0007067~mitotic nuclear division	11	1.12474	0.00483239	A8HAL1, Q1LYE3, A5WWB6, F1R041, F1QCU5, Q5RII9, F1QY72, Q4QRG0, F1QY75, Q5RIL6, A0A0R4IU07	708	81	14912	2.86029	0.994224	0.32731	7.42402
GOTERM_MF_DIRECT	GO:0003777~microtubule motor activity	10	1.02249	0.00488252	X1WGN9, E7EZB9, A0A0R4IM96, F1QH25, F1QV34, F1QK82, Q1LW14, Q08CF1, E7FDX9, F1QPR6	665	77	15797	3.08505	0.958676	0.191375	7.04871
GOTERM_MF_DIRECT	GO:0008270~zinc ion binding	73	7.46421	0.00514861	Q5SPB2, F1QA30, Q91430, F1Q4Q5, Q4QRG0, Q08BH9, X1WEZ5, F1QQ05, A4VCF7, F1Q949, F1QAM6, A0A0R4IX34, E7FEJ5, E7FEN5, B0UY40, E9QJ33, F1QFN7, E9QEX7, Q6IQH8, Q7T321, F1QFR1, F1Q6J9, X1WDM3, Q6NV05, E7F4T8, X1WCE5, Q4L1M6, F6NIQ9, F1QL52, P53405, Q5RFW2, F1QJ77, Q5U3J0, Q7SXI4, E7F2R2, P53406, E9QG68, A0A0R4IPF3, B1H1L9, F1R6M2, Q804S5, N0A274, P0CH95, A8DZI0, A0A0H2UKN4, F1QXL1, X1WCF3, F1QL68, Q5S…	665	1266	15797	1.36975	0.965279	0.189436	7.4192
GOTERM_CC_DIRECT	GO:0016607~nuclear speck	7	0.715746	0.00534687	F1QE31, B8A4R6, Q1ECZ4, F1Q6L6, A0A0R4IKI2, F1RD88, Q7SXL7	657	38	15208	4.26404	0.786481	0.175521	6.87206
GOTERM_CC_DIRECT	GO:0012505~endomembrane system	10	1.02249	0.006271	F1R5W8, Q7T361, A0A0A0MPL4, E7F513, A5PMJ7, E7FB23, F1Q5I0, E7EXN4, Q567Y3, E7EY32	657	78	15208	2.96765	0.83663	0.182336	8.01456
GOTERM_BP_DIRECT	GO:0007420~brain development	17	1.73824	0.00657291	Q8JI10, F6PBE4, Q1L8R2, Q6TA36, F1R9C9, A0A0R4IT86, A0A0R4IDN1, Q804S5, Q1MT43, P0CH95, P79746, F1QQ50, F8W3X3, E7F1D2, F8W381, Q9I9B4, Q6AXJ2	708	169	14912	2.11868	0.999103	0.394191	9.96904
GOTERM_MF_DIRECT	GO:0001104~RNA polymerase II transcription cofactor activity	6	0.613497	0.00663567	F1R739, F1QGP2, R4GDN4, Q6DH26, F1R9C9, Q6IQ63	665	29	15797	4.9148	0.986888	0.225048	9.46448
GOTERM_MF_DIRECT	GO:0008017~microtubule binding	14	1.43149	0.00728427	F1Q515, A5WUN7, Q1LW14, A0A0R4IFA2, A0A0R4IJ30, A0A0R4IB19, X1WGN9, F1QH25, A0A0R4IM96, F1QV34, Q5RII9, F1QK82, E7FDX9, F1QPR6	665	143	15797	2.32565	0.991429	0.232343	10.3433
GOTERM_CC_DIRECT	GO:0016592~mediator complex	6	0.613497	0.0073865	F1R739, F1QGP2, R4GDN4, Q6DH26, F1R9C9, Q6IQ63	657	29	15208	4.78917	0.88178	0.192265	9.37639
UP_KEYWORDS	Phosphoprotein	20	2.04499	0.00826645	F1RE85, A0A0R4IW61, F1QDM3, E7EZG7, F1QD52, F1Q6L6, F1QE38, P79746, F1QQ02, J9JI09, E7F5J8, A0A0B4J1A6, Q8JFE3, Q1ECZ4, Q6NY74, Q8UVK2, Q7SZY0, Q7ZUQ3, A0A0R4IB77, Q7ZTS4	971	240	22487	1.92988	0.822106	0.134009	9.94143
UP_KEYWORDS	TPR repeat	7	0.715746	0.00882162	F6PBE4, P0CI65, F1R498, F1R7L2, Q6NXA1, F1QQI6, F1QSU2	971	42	22487	3.85977	0.841664	0.132181	10.5753
GOTERM_MF_DIRECT	GO:0000976~transcription regulatory region sequence-specific DNA binding	6	0.613497	0.00886199	X1WHA2, Q1L8R2, F1QE20, L0ANA2, Q802Z5, Q1LXH3	665	31	15797	4.59772	0.996957	0.262872	12.4478
UP_KEYWORDS	Cell division	11	1.12474	0.00903537	A8HAL1, B0S729, A5WWB6, F1R041, F1QCU5, Q2KN93, Q3LGD4, Q5RII9, E9QIC1, F1QY75, A0A0R4IU07	971	97	22487	2.62623	0.84861	0.126153	10.8183
GOTERM_MF_DIRECT	GO:0000977~RNA polymerase II regulatory region sequence-specific DNA binding	10	1.02249	0.00998986	F2Z4S1, F1R041, F1RBV9, A0A0R4IZF6, A5PLE8, F6NIQ9, Q90X27, F1QE20, Q5RJ20, Q1LXH3	665	86	15797	2.7622	0.99855	0.278776	13.924
UP_KEYWORDS	Cytoplasmic vesicle	8	0.817996	0.0100032	Q3LGD4, F1R5G5, F1QZJ9, A2AV37, Q566V9, F1RC21, A0A0R4ITX6, Q6P0C7	971	56	22487	3.30837	0.876454	0.130128	11.9108
GOTERM_MF_DIRECT	GO:0008565~protein transporter activity	8	0.817996	0.010507	Q8JFT7, A0A0R4IW43, Q6P5J9, A4VCH4, F1R606, F1QEW3, B8JHR9, F1QB53	665	58	15797	3.27654	0.998968	0.279235	14.5931
GOTERM_BP_DIRECT	GO:0007275~multicellular organism development	40	4.08998	0.0106644	P53405, Q8JI10, F1R5K1, O42368, P53406, A0A0R4IKW7, Q8AWZ2, Q804S5, E7F5R3, Q91981, P79746, F1QMF7, F1RBV9, Q5BJ08, O42370, Q6NZ07, F1QE65, E9QD84, F6NKE2, Q8JGR7, F1QGF8, Q9PWM6, Q9PTH3, E7FGP3, A5PLE8, F1Q819, F1RE13, A0A0R4IKT3, F1R7N4, Q9YHE8, F1QI01, Q91994, E7F5J8, F1QTW3, F1R982, B1PBZ7, Q8AXV6, A2BGM5, F1QVN9, F1Q7J8	708	560	14912	1.50444	0.999989	0.532577	15.6958
GOTERM_BP_DIRECT	GO:0072015~glomerular visceral epithelial cell development	5	0.511247	0.0109855	F1QBX4, X1WE18, Q4L1M6, A0A0R4IT86, F8W3L6	708	19	14912	5.54267	0.999992	0.520293	16.1305
GOTERM_MF_DIRECT	GO:0003676~nucleic acid binding	76	7.77096	0.011253	F1QH89, Q4QRG0, A0A0G2KPV8, Q6PE21, Q567F5, F1RE03, A0A0R4IKW7, F1QUB8, B0UYL3, F1Q5Q7, F1QQ02, E7FFR4, F1R041, F1QSH8, Q6NWH7, F1Q949, F1RE12, F6PCB5, A0A0R4IJ19, Q76LC6, Q802Z5, F1RCY7, F1QRT7, E9QJ33, E7FEV4, A0A0R4IA21, B5DE31, Q1LVH7, F1QCB1, Q6NV05, Q49TU3, A9C3V8, F1R4T3, F1QM98, Q9IBD1, F8W3D4, F1QDF2, Q6NY74, Q8UVK2, F1RD88, F1QBS1, X1WH58, X1WCA2, A0A0R4IW61, F1QXP8, Q1LYE3, F1RBQ7, Q1L…	665	1375	15797	1.313	0.999368	0.284572	15.5496
GOTERM_BP_DIRECT	GO:0060027~convergent extension involved in gastrulation	9	0.920245	0.0113905	Q5RFW2, F1QQ50, E7EZG7, E9QB24, B0UY93, F1QE38, F1Q6J9, B0S7W7, Q5RIL6	708	65	14912	2.9163	0.999995	0.511787	16.6757
GOTERM_MF_DIRECT	GO:0070736~protein-glycine ligase activity, initiating	8	0.817996	0.011502	F1R041, A9JRZ0, Q7T321, A9JTG5, F1QX65, F1QIM8, Q804S5, N0A274	665	59	15797	3.221	0.999464	0.279235	15.8666
GOTERM_MF_DIRECT	GO:0043774~coenzyme F420-2 alpha-glutamyl ligase activity	8	0.817996	0.011502	F1R041, A9JRZ0, Q7T321, A9JTG5, F1QX65, F1QIM8, Q804S5, N0A274	665	59	15797	3.221	0.999464	0.279235	15.8666
GOTERM_MF_DIRECT	GO:0018169~ribosomal S6-glutamic acid ligase activity	8	0.817996	0.011502	F1R041, A9JRZ0, Q7T321, A9JTG5, F1QX65, F1QIM8, Q804S5, N0A274	665	59	15797	3.221	0.999464	0.279235	15.8666
GOTERM_MF_DIRECT	GO:0070735~protein-glycine ligase activity	8	0.817996	0.011502	F1R041, A9JRZ0, Q7T321, A9JTG5, F1QX65, F1QIM8, Q804S5, N0A274	665	59	15797	3.221	0.999464	0.279235	15.8666
GOTERM_MF_DIRECT	GO:0070737~protein-glycine ligase activity, elongating	8	0.817996	0.011502	F1R041, A9JRZ0, Q7T321, A9JTG5, F1QX65, F1QIM8, Q804S5, N0A274	665	59	15797	3.221	0.999464	0.279235	15.8666
GOTERM_MF_DIRECT	GO:0043773~coenzyme F420-0 gamma-glutamyl ligase activity	8	0.817996	0.011502	F1R041, A9JRZ0, Q7T321, A9JTG5, F1QX65, F1QIM8, Q804S5, N0A274	665	59	15797	3.221	0.999464	0.279235	15.8666
GOTERM_MF_DIRECT	GO:0008766~UDP-N-acetylmuramoylalanyl-D-glutamyl-2,6-diaminopimelate-D-alanyl-D-alanine ligase activity	8	0.817996	0.011502	F1R041, A9JRZ0, Q7T321, A9JTG5, F1QX65, F1QIM8, Q804S5, N0A274	665	59	15797	3.221	0.999464	0.279235	15.8666
GOTERM_BP_DIRECT	GO:0051301~cell division	12	1.22699	0.0117184	A8HAL1, B0S729, A5WWB6, F1R041, F1QCU5, Q2KN93, Q3LGD4, Q5RII9, E9QIC1, F1QY75, R4GEI9, A0A0R4IU07	708	106	14912	2.38439	0.999996	0.501813	17.1148
GOTERM_CC_DIRECT	GO:0000139~Golgi membrane	16	1.63599	0.0118284	F1Q8M3, Q5RFV2, F1REP6, B8A4N9, B0UYD3, Q7SXP0, Q6P0C7, F1RBV9, Q6DHI8, F8W381, L7YAI7, E9QF32, F1R429, F1RC21, F1R7M5, B8JLR8	657	181	15208	2.0462	0.967512	0.267678	14.6163
GOTERM_MF_DIRECT	GO:0070738~tubulin-glycine ligase activity	8	0.817996	0.0125633	F1R041, A9JRZ0, Q7T321, A9JTG5, F1QX65, F1QIM8, Q804S5, N0A274	665	60	15797	3.16732	0.999734	0.290317	17.2056
GOTERM_MF_DIRECT	GO:0070739~protein-glutamic acid ligase activity	8	0.817996	0.0125633	F1R041, A9JRZ0, Q7T321, A9JTG5, F1QX65, F1QIM8, Q804S5, N0A274	665	60	15797	3.16732	0.999734	0.290317	17.2056
GOTERM_BP_DIRECT	GO:0043124~negative regulation of I-kappaB kinase/NF-kappaB signaling	3	0.306748	0.0126348	X1WEZ5, E7F165, A0A0R4IPR2	708	4	14912	15.7966	0.999999	0.509366	18.3302
GOTERM_BP_DIRECT	GO:0006396~RNA processing	9	0.920245	0.0135588	A0A140LFU1, Q6P6E4, Q803R7, A5WWH4, X2BQ53, E7F365, F1QCB1, F1Q5Q7, Q90X41	708	67	14912	2.82924	1	0.516288	19.5389
GOTERM_MF_DIRECT	GO:0070740~tubulin-glutamic acid ligase activity	8	0.817996	0.0136933	F1R041, A9JRZ0, Q7T321, A9JTG5, F1QX65, F1QIM8, Q804S5, N0A274	665	61	15797	3.1154	0.999874	0.301651	18.6093
UP_KEYWORDS	Developmental protein	32	3.27198	0.0154918	P53405, Q8JI10, F1R5K1, O42368, P53406, Q8AWZ2, Q804S5, Q91981, P79746, F1QMF7, O42370, Q6NZ07, F1QE65, E9QD84, F6NKE2, Q8JGR7, F1QGF8, Q9PWM6, E7FGP3, Q9PTH3, F1Q819, F1RE13, Q9YHE8, F1QI01, Q91994, E7F5J8, F1QTW3, E7FCN8, Q8AXV6, F1QVN9, A2BGM5, F1Q7J8	971	476	22487	1.55688	0.96113	0.183698	17.8769
UP_KEYWORDS	Cytoplasm	56	5.72597	0.0160243	B0S8I3, A0A0R4IZ33, F1R5G5, F1QA30, F1QFA6, A5WUN7, B0S5C8, Q1RM03, F1QH50, A4IGD2, F1R041, Q2KN93, A9JRZ0, A4QP78, Q8JFE3, F1QDV8, Q9I9N5, Q7ZUQ3, Q76LC6, Q568F6, Q7T2A5, A0A0R4ITX6, F1QS48, E7FEV4, F1REW2, F1QE31, J9JI09, Q5RII9, Q9IBD1, E7FCN8, A0A0R4IJ07, A0A0R4IW61, F1QCU5, F1R9G6, Q804S5, A0A0R4IVY9, A0A0R4IB19, A0A0R4IRV1, F1QSU2, A0A0R4IB26, A0A0B4J1A6, F1QE65, Q1ECZ4, Q1L8R8, Q6AXJ2, Q6P…	971	947	22487	1.36946	0.965266	0.179343	18.4354
GOTERM_MF_DIRECT	GO:0017070~U6 snRNA binding	3	0.306748	0.0162095	Q6P6E4, Q6PH45, A0A0R4J8E6	665	5	15797	14.2529	0.999976	0.33581	21.6558
UP_KEYWORDS	Protein transport	15	1.53374	0.0163833	Q8JFT7, F1RE85, B0S8I3, F1R5G5, Q5TZ80, B0S5C8, A4VCH4, F1R9G6, F1QEW3, Q7SXP0, Q6P0C7, B0S5H0, Q6DI32, F1R606, A0A0R4ITX6	971	171	22487	2.03146	0.967805	0.173773	18.81
GOTERM_CC_DIRECT	GO:0031235~intrinsic component of the cytoplasmic side of the plasma membrane	4	0.408998	0.0165275	F1R3X3, A5PF31, E7F1U4, F1QX32	657	13	15208	7.12235	0.991768	0.329664	19.8537
GOTERM_BP_DIRECT	GO:0051225~spindle assembly	4	0.408998	0.0169349	F1QCU5, F1RCL4, F1RBF5, E7FFW3	708	12	14912	7.02072	1	0.579109	23.8139
GOTERM_CC_DIRECT	GO:0005675~holo TFIIH complex	3	0.306748	0.017032	F1R685, A5WWE3, B8A5G8	657	5	15208	13.8886	0.992899	0.316532	20.398
UP_KEYWORDS	RNA-binding	16	1.63599	0.0172003	A0A0R4IW61, Q6P0B1, I3ISM5, E7FEV4, F1Q6L6, A0A0R4I9C3, Q6P5J9, F1QUB8, Q6NV05, F1QZ57, F1QSU2, F1QH50, A0A0B4J1A6, Q9IBD1, Q1ECZ4, F8W3D4, Q76LC6	971	189	22487	1.96052	0.972915	0.172988	19.6565
GOTERM_BP_DIRECT	GO:0006366~transcription from RNA polymerase II promoter	9	0.920245	0.017355	F1QAN3, F1R685, F1QDF2, A0A0R4IKW7, Q90X27, Q5TYT6, F1QI36, E9QES8, A0A0R4IKT3	708	70	14912	2.70799	1	0.571182	24.3308
GOTERM_BP_DIRECT	GO:0006906~vesicle fusion	8	0.817996	0.0176248	Q7SZZ5, Q7T361, A0A0A0MPL4, A5PMJ7, E7EXN4, Q567Y3, Q6IQK3, X1WDZ6	708	57	14912	2.95609	1	0.560716	24.6609
GOTERM_MF_DIRECT	GO:0032947~protein complex scaffold	4	0.408998	0.0190246	Q0P3X8, F1Q897, F1QFA6, Q66HX5	665	14	15797	6.78711	0.999996	0.370685	24.9377
GOTERM_MF_DIRECT	GO:0003682~chromatin binding	13	1.32924	0.0193104	B0S576, A0A0R4IGM2, X1WHA2, Q66HY6, P0CH95, Q8JFE3, F1QTW3, F1QDF2, F1R8L7, F1QXU7, A2BGM5, U3JA58, E7F226	665	145	15797	2.12975	0.999997	0.36451	25.2637
UP_KEYWORDS	Zinc-finger	46	4.70348	0.0203992	Q5RFW2, Q1LYE3, B8JKJ8, Q5U3J0, Q7SXI4, Q91430, F1QA30, F1Q4Q5, Q4QRG0, A0A0R4IPF3, E9QG68, F1R6M2, Q804S5, E7FE23, P0CH95, F1R041, A4VCF7, A8DZI0, F1QXL1, F1QAM6, E9QCS7, I3IS56, Q5SP49, A0A0R4IX34, F1QLY4, A0A0R4IXX0, Z4YI11, E9QJ33, A8HAL1, A0A0R4IVZ0, Q7T321, Q6IQH8, F1QS51, F1QX65, F1QFR1, A0A0R4IRG9, Q7T355, Q5RHY1, A9JTG5, F1QLC4, Q6NY74, F1QIM8, B0S5T9, F1QL52, F1QCH3, A0A0R4IF41	971	760	22487	1.4017	0.986253	0.19293	22.8937
GOTERM_BP_DIRECT	GO:0031571~mitotic G1 DNA damage checkpoint	3	0.306748	0.0203996	B0S576, E7F5P0, Q8JFE3	708	5	14912	12.6373	1	0.598975	27.9791
GOTERM_BP_DIRECT	GO:0051642~centrosome localization	3	0.306748	0.0203996	F1QE08, A0A0R4I9H0, A0A0R4IFA2	708	5	14912	12.6373	1	0.598975	27.9791
GOTERM_BP_DIRECT	GO:0000301~retrograde transport, vesicle recycling within Golgi	3	0.306748	0.0203996	A0A0R4IXT6, A0A0R4IW43, B8A4N9	708	5	14912	12.6373	1	0.598975	27.9791
GOTERM_MF_DIRECT	GO:0000166~nucleotide binding	88	8.99796	0.0223787	A0A0R4IPH9, E7FAB6, F1Q4Q5, Q4QRG0, Q7T3L5, Q1LW14, Q6PE21, F1RE03, F1QUB8, B0UYL3, F1Q5Q7, F1QH50, A5WVY0, Q6NWH7, F1QU92, F1QKS1, Q7ZUQ3, R4GEF5, C5J7W8, Q76LC6, Q568F6, Q802Z5, Q1LYG2, F1RCY7, F1QN99, F1Q693, E7FEV4, F1REW2, Q1LVH7, F1QCB1, E7FDV3, Q6NV05, A0A0R4IJ30, A9C3V8, F1QMM1, F1R685, A2A121, J9JI09, Q5RII9, Q9IBD1, B3DFS9, F8W3D4, Q7ZUN7, Q503W7, F1QVW1, X1WCA2, A0A0R4IW61, Q1LYE3, Q7T…	665	1678	15797	1.24579	1	0.398344	28.6806
GOTERM_CC_DIRECT	GO:0005813~centrosome	10	1.02249	0.022638	X1WBK2, F1QCU5, Q5RII9, F1QE08, X1WH62, A0A0R4I9H0, E9QBC3, A0A0R4IXQ3, A0A0R4IFA2, A0A0R4IQI9	657	96	15208	2.41121	0.998632	0.375653	26.2201
GOTERM_MF_DIRECT	GO:0032041~NAD-dependent histone deacetylase activity (H3-K14 specific)	3	0.306748	0.0236422	E7FH14, F1QRR4, F1QUC5	665	6	15797	11.8774	1	0.405002	30.0448
GOTERM_CC_DIRECT	GO:0000118~histone deacetylase complex	4	0.408998	0.0246659	E7FF48, A5PF33, E7FH14, F1QRR4	657	15	15208	6.1727	0.999248	0.380922	28.2273
GOTERM_CC_DIRECT	GO:0001726~ruffle	3	0.306748	0.0248236	A0A0R4IIA7, F1QE65, A0A0R4IDZ8	657	6	15208	11.5738	0.999282	0.363941	28.3812
GOTERM_BP_DIRECT	GO:0007219~Notch signaling pathway	7	0.715746	0.0274731	Q6DI32, F8W381, Q6TA36, B8A4R6, A0A0R4IKI2, Q8AXV6, Q804S5	708	49	14912	3.00888	1	0.694443	35.8292
GOTERM_MF_DIRECT	GO:0008408~3'-5' exonuclease activity	4	0.408998	0.0275049	F8W411, E7FDC5, E7FB68, F1Q5Q7	665	16	15797	5.93872	1	0.443282	34.066
GOTERM_MF_DIRECT	GO:0005096~GTPase activator activity	16	1.63599	0.0286368	F1R3X3, Q1LXU3, F1R9R7, A0A0R4IXD9, A5PF31, E7F1U4, A0A0G2KLX0, E7FB23, F1R651, Q1LXG3, F1R5W8, E7F513, E7FE99, F1QX32, E7F065, E7EY32	665	207	15797	1.83613	1	0.446273	35.2027
GOTERM_BP_DIRECT	GO:0000042~protein targeting to Golgi	3	0.306748	0.0296465	Q5RGI3, F1REE8, E7FEK9	708	6	14912	10.5311	1	0.708167	38.0751
GOTERM_BP_DIRECT	GO:0006886~intracellular protein transport	18	1.84049	0.0305191	A0A0R4IW43, A0A0A0MPL4, Q6IQJ1, E7FB23, A8WI00, Q567Y3, A5PMY5, F1QQ05, F1R5W8, Q6DI32, E9QCS7, Q7T361, E7F513, A5PMJ7, E7EXN4, F1RDC5, E7EY32, A0A0R4ITX6	708	218	14912	1.73908	1	0.705187	38.956
UP_KEYWORDS	SH2 domain	6	0.613497	0.0306527	F1R3X3, F1R6R9, F1QBJ1, F1QSC3, F6P9Y8, A0A0R4IB77	971	41	22487	3.38906	0.998459	0.265348	32.478
UP_KEYWORDS	Zinc	61	6.23722	0.0312129	Q91430, F1QA30, F1Q4Q5, Q4QRG0, E7FE23, F1R041, A4VCF7, Q8JFE3, F1QAM6, A0A0R4IX34, X1WHZ5, Q1LYG2, E9QJ33, F1QFN7, Q7T321, Q6IQH8, F1QS51, P83758, F1QFR1, F1Q6J9, Q5RGA4, X1WCE5, Q4L1M6, Q6NY74, F1QL52, P53405, Q5RFW2, Q1LYE3, B8JKJ8, Q5U3J0, Q7SXI4, E7F2R2, P53406, E9QG68, A0A0R4IPF3, F1R6M2, Q804S5, P0CH95, A8DZI0, F1QXL1, E9QCS7, I3IS56, Q5SP49, F1QLY4, A0A0R4IXX0, Z4YI11, A8HAL1, A0A0R4IVZ0,…	971	1088	22487	1.29841	0.998634	0.259039	32.9686
GOTERM_BP_DIRECT	GO:0048193~Golgi vesicle transport	4	0.408998	0.0315196	F1RBV9, B8A4N9, E7EXN4, Q567Y3	708	15	14912	5.61657	1	0.703891	39.9516
GOTERM_BP_DIRECT	GO:0006915~apoptotic process	12	1.22699	0.0317999	B0S576, F1R685, Q8JFE3, Q5TZI3, U3JAJ5, F1QA30, Q9I9N5, Q7ZUQ3, A0A0R4IJ30, A0A0R4IKR8, Q66HX5, A0A0R4IRG9	708	123	14912	2.05484	1	0.694462	40.2277
GOTERM_MF_DIRECT	GO:0003714~transcription corepressor activity	7	0.715746	0.031843	E7FF48, Q6W2J8, F1QZ88, A5PF33, F8W3I2, F1QXU7, A2CF54	665	57	15797	2.91727	1	0.471861	38.3244
GOTERM_BP_DIRECT	GO:0048675~axon extension	5	0.511247	0.0326454	P53405, Q5RII9, F1R9L1, F1QE65, P53406	708	26	14912	4.05041	1	0.691842	41.0535
GOTERM_BP_DIRECT	GO:0007018~microtubule-based movement	9	0.920245	0.0332325	X1WGN9, E7EZB9, A0A0R4IM96, F1QH25, F1QV34, F1QK82, Q1LW14, E7FDX9, F1QPR6	708	79	14912	2.39949	1	0.686517	41.6207
GOTERM_BP_DIRECT	GO:0006397~mRNA processing	11	1.12474	0.0358874	F1QQ02, F1QH50, Q6P0B1, E7FEV4, Q5RKQ0, Q9IBD1, F1QYL2, Q1ECZ4, Q76LC6, F1RD88, A0A0R4IRV1, Q7SXL7	708	110	14912	2.10621	1	0.703348	44.1221
GOTERM_MF_DIRECT	GO:0002039~p53 binding	4	0.408998	0.0376748	B0S576, E9QJ33, Q8JFE3, Q5TZI3	665	18	15797	5.27886	1	0.520639	43.6457
GOTERM_BP_DIRECT	GO:0007099~centriole replication	3	0.306748	0.040218	X1WBK2, F1QCU5, X1WC30	708	7	14912	9.02663	1	0.733804	47.9877
GOTERM_BP_DIRECT	GO:0021884~forebrain neuron development	3	0.306748	0.040218	F1QAE1, B3DGA5, F1QRM5	708	7	14912	9.02663	1	0.733804	47.9877
GOTERM_MF_DIRECT	GO:0016887~ATPase activity	12	1.22699	0.0422593	F1QMM1, F8W411, E7EZB9, A0A0R4IM96, F1QH25, B0S640, A0A0R4IJ25, Q1LW14, F1QCK2, F1QPR6, Q503W7, F1R651	665	145	15797	1.96592	1	0.552069	47.5247
UP_KEYWORDS	SH3 domain	14	1.43149	0.0433899	F1R3X3, E9QF66, B5DE36, E7FE08, F1R446, A8WI00, A8WHZ5, A5PMY5, Q1LX61, F1QBX4, J9JI09, Q5TZI3, X1WFJ8, E7EXQ0	971	177	22487	1.83175	0.999902	0.330459	42.8545
GOTERM_CC_DIRECT	GO:0005847~mRNA cleavage and polyadenylation specificity factor complex	3	0.306748	0.0437609	F6NXE7, F1Q949, F1QJZ5	657	8	15208	8.68037	0.999997	0.531431	44.8016
GOTERM_CC_DIRECT	GO:0070822~Sin3-type complex	3	0.306748	0.0437609	Q7ZZ36, B0S8H2, B8JJJ1	657	8	15208	8.68037	0.999997	0.531431	44.8016
GOTERM_CC_DIRECT	GO:0016514~SWI/SNF complex	3	0.306748	0.0437609	F1Q9K1, A0A0R4IJ25, E7EYW7	657	8	15208	8.68037	0.999997	0.531431	44.8016
GOTERM_BP_DIRECT	GO:0071542~dopaminergic neuron differentiation	4	0.408998	0.0439299	F1R469, F1QMF7, B3DGA5, Q7SX92	708	17	14912	4.9558	1	0.754843	51.1003
GOTERM_BP_DIRECT	GO:0061053~somite development	5	0.511247	0.0464301	Q802C8, F8W381, A0A0R4IDN1, A0A0R4IXX0, Q802Z5	708	29	14912	3.6314	1	0.764323	53.0974
GOTERM_CC_DIRECT	GO:0005667~transcription factor complex	10	1.02249	0.0481249	B0S576, F1QVQ9, Q9YHE8, F1QZ88, Q5RIV1, Q8JFE3, Q8JIG3, Q1L8R8, F1QXU7, F1QS48	657	110	15208	2.10433	0.999999	0.545766	48.0547
UP_KEYWORDS	mRNA processing	8	0.817996	0.0481446	F1QQ02, F1QH50, Q6P0B1, E7FEV4, Q5RKQ0, Q9IBD1, Q1ECZ4, A0A0R4IRV1, Q7SXL7	971	77	22487	2.40609	0.999965	0.347949	46.3357
GOTERM_MF_DIRECT	GO:0003690~double-stranded DNA binding	5	0.511247	0.0482346	F1QPP5, B0S576, Q8JFE3, Q8JIG3, Q1L8H2	665	33	15797	3.59923	1	0.590975	52.207
UP_KEYWORDS	Mitosis	7	0.715746	0.0504338	A8HAL1, A5WWB6, F1R041, F1QCU5, Q5RII9, F1QY75, A0A0R4IU07	971	62	22487	2.61468	0.999979	0.349855	47.9412
GOTERM_BP_DIRECT	GO:0032836~glomerular basement membrane development	3	0.306748	0.051968	X1WE18, A0A0R4IT86, F8W3L6	708	8	14912	7.89831	1	0.793466	57.2521
GOTERM_BP_DIRECT	GO:0048592~eye morphogenesis	3	0.306748	0.051968	Q3LGD4, Q7SX76, A0A0R4IDN1	708	8	14912	7.89831	1	0.793466	57.2521
GOTERM_CC_DIRECT	GO:0071013~catalytic step 2 spliceosome	5	0.511247	0.0521658	Q803R7, Q5RKQ0, E7F365, Q90X41, A0A0R4J8E6	657	33	15208	3.50722	1	0.556073	50.908
GOTERM_CC_DIRECT	GO:0019005~SCF ubiquitin ligase complex	5	0.511247	0.0521658	E7F5P0, Q1LXS8, H9KUW9, F1Q6J6, F1R1Z0	657	33	15208	3.50722	1	0.556073	50.908
GOTERM_MF_DIRECT	GO:0017137~Rab GTPase binding	8	0.817996	0.0537312	Q1LXG3, F1R5W8, Q3LGD4, Q6DHI8, E7F513, E7FB23, A0A0R4IY52, E7EY32	665	81	15797	2.34616	1	0.62157	56.1672
UP_KEYWORDS	Purine biosynthesis	3	0.306748	0.0547044	F1Q9U6, A0A0G2KGL2, Q568F6	971	9	22487	7.71953	0.999992	0.36241	50.8187
GOTERM_BP_DIRECT	GO:0042472~inner ear morphogenesis	4	0.408998	0.0584017	A0A0G2KGS0, Q91994, Q4L1M6, B3DKL9	708	19	14912	4.43414	1	0.822801	61.6451
GOTERM_MF_DIRECT	GO:0008134~transcription factor binding	6	0.613497	0.0621168	E7FF48, E7FFQ2, Q5TZI3, F8W3I2, F1Q819, E7FBZ0	665	51	15797	2.79469	1	0.666678	61.6233
GOTERM_BP_DIRECT	GO:0006887~exocytosis	7	0.715746	0.0639572	Q7SZZ5, Q6PC63, A2AV37, Q6IQK3, Q7SXP0, Q6P0C7, X1WDZ6	708	60	14912	2.45725	1	0.842862	65.0944
GOTERM_BP_DIRECT	GO:0006913~nucleocytoplasmic transport	3	0.306748	0.0647614	F1R2H0, Q5RI09, F1Q953	708	9	14912	7.02072	1	0.839045	65.5689
UP_KEYWORDS	Cytoskeleton	16	1.63599	0.0656635	F1QCU5, A5WUN7, Q5TZ80, A0A0R4IVY9, Q804S5, A0A0R4IB19, Q1RM03, F1QH25, Q2KN93, Q5RII9, A0A0R4I9H0, E7FCN8, Q9I9N5, A0A0R4IXQ3, F8W425, A0A0R4IB77	971	226	22487	1.63955	0.999999	0.407394	57.5463
GOTERM_BP_DIRECT	GO:0042462~eye photoreceptor cell development	4	0.408998	0.0663738	F1QV34, F1Q949, Q9DGJ4, B3DKL9	708	20	14912	4.21243	1	0.839083	66.5021
UP_KEYWORDS	mRNA transport	4	0.408998	0.0669644	F1QH50, A0A0B4J1A6, Q1ECZ4, B0S5C8	971	22	22487	4.21065	0.999999	0.402433	58.2859
UP_KEYWORDS	Ubl conjugation pathway	15	1.53374	0.0671546	Q08BW0, A8HAL1, H9KUW9, Q7T321, F1QX65, E9QG68, Q5RGA4, Q804S5, B0S5H0, F1R041, A9JRZ0, F1QL68, A9JTG5, F1QIM8, A3KQS4	971	208	22487	1.67009	0.999999	0.392617	58.393
GOTERM_CC_DIRECT	GO:0048471~perinuclear region of cytoplasm	6	0.613497	0.0725343	A0A0B4J1A6, F1QE65, Q1ECZ4, A0A0R4IDN1, E7F8A0, Q804S5	657	52	15208	2.67088	1	0.661866	63.2107
GOTERM_CC_DIRECT	GO:0030496~midbody	4	0.408998	0.074586	Q3LGD4, Q5RII9, F1R9G6, Q502I3	657	23	15208	4.02568	1	0.654599	64.2769
GOTERM_BP_DIRECT	GO:0000381~regulation of alternative mRNA splicing, via spliceosome	4	0.408998	0.0748128	I3ISM5, Q6NWH7, Q7SXL7, Q90X41	708	21	14912	4.01184	1	0.867072	71.0119
GOTERM_MF_DIRECT	GO:0008568~microtubule-severing ATPase activity	3	0.306748	0.0754691	Q5RII9, A0A0R4IB19, Q503W7	665	11	15797	6.47861	1	0.730133	69.021
GOTERM_BP_DIRECT	GO:0043087~regulation of GTPase activity	6	0.613497	0.0757804	E7F8G5, E7FBD5, F1R3X3, A5PF31, E7F1U4, F1QX32	708	48	14912	2.63277	1	0.864178	71.491
GOTERM_BP_DIRECT	GO:0015031~protein transport	15	1.53374	0.0778609	Q6P0B3, Q8JFT7, F1RE85, B0S8I3, F1R5G5, Q5TZ80, B0S5C8, A4VCH4, F1R9G6, F1QEW3, Q7SXP0, Q6P0C7, B0S5H0, F1R606, A0A0R4ITX6	708	194	14912	1.62852	1	0.86544	72.4959
GOTERM_BP_DIRECT	GO:0000165~MAPK cascade	3	0.306748	0.0784732	Q7T2F2, F1QE20, Q1LXH3	708	10	14912	6.31864	1	0.861408	72.7853
GOTERM_BP_DIRECT	GO:0048665~neuron fate specification	3	0.306748	0.0784732	P53405, P53406, Q804S5	708	10	14912	6.31864	1	0.861408	72.7853
GOTERM_BP_DIRECT	GO:0032922~circadian regulation of gene expression	3	0.306748	0.0784732	Q5RIV1, F1R982, Q6NY50	708	10	14912	6.31864	1	0.861408	72.7853
GOTERM_BP_DIRECT	GO:0006265~DNA topological change	3	0.306748	0.0784732	F1R685, X1WCF3, Q1ED17	708	10	14912	6.31864	1	0.861408	72.7853
GOTERM_CC_DIRECT	GO:0000776~kinetochore	5	0.511247	0.0797311	A5WWB6, D9IWE2, A0A0R4IFA2, R4GEI9, A0A0R4IQI9	657	38	15208	3.04574	1	0.663014	66.8262
GOTERM_BP_DIRECT	GO:0048666~neuron development	6	0.613497	0.0812699	P53405, Q6DG75, F1QTW3, B0S5C8, F1QXU7, Q804S5	708	49	14912	2.57904	1	0.865228	74.0712
GOTERM_MF_DIRECT	GO:1990380~Lys48-specific deubiquitinase activity	2	0.204499	0.0823023	F1RBY0, A3KQS4	665	2	15797	23.7549	1	0.752864	72.2698
GOTERM_CC_DIRECT	GO:0000151~ubiquitin ligase complex	6	0.613497	0.0824239	Q7T355, E9QHZ7, E7F6E1, Q804S5, F1Q5A9, F1QB63	657	54	15208	2.57196	1	0.659424	68.0924
GOTERM_MF_DIRECT	GO:0005515~protein binding	15	1.53374	0.0832843	Q5RIV1, F1Q6J9, Q804S5, A9JRH0, F1RE13, B3DGV3, F6NLH0, F1R4T3, E2DGP8, A4VCF7, F1QH25, Q6DI32, Q7SX76, B3DIP9, F1QS48	665	221	15797	1.61232	1	0.748603	72.7096
GOTERM_CC_DIRECT	GO:0035371~microtubule plus-end	2	0.204499	0.0844125	R4GEI9, A0A0R4IQI9	657	2	15208	23.1476	1	0.652945	68.9986
GOTERM_MF_DIRECT	GO:0008574~ATP-dependent microtubule motor activity, plus-end-directed	3	0.306748	0.0881151	F1QV34, F1QK82, E7FDX9	665	12	15797	5.93872	1	0.76063	74.7802
GOTERM_MF_DIRECT	GO:0005487~nucleocytoplasmic transporter activity	3	0.306748	0.0881151	A0A0R4IVZ0, F1R2H0, Q5RI09	665	12	15797	5.93872	1	0.76063	74.7802
GOTERM_BP_DIRECT	GO:0006449~regulation of translational termination	2	0.204499	0.0925781	F1QTC6, B0S5C8	708	2	14912	21.0621	1	0.894292	78.7123
GOTERM_BP_DIRECT	GO:0070536~protein K63-linked deubiquitination	3	0.306748	0.0929876	Q08BW0, X1WEZ5, E7F165	708	11	14912	5.74422	1	0.890242	78.8648
GOTERM_BP_DIRECT	GO:0035329~hippo signaling	3	0.306748	0.0929876	Q7ZUQ3, Q5RIL6, Q66HX5	708	11	14912	5.74422	1	0.890242	78.8648
GOTERM_BP_DIRECT	GO:0051289~protein homotetramerization	3	0.306748	0.0929876	A8HAL1, F1QYY6, A0A0R4II01	708	11	14912	5.74422	1	0.890242	78.8648
GOTERM_BP_DIRECT	GO:0009648~photoperiodism	3	0.306748	0.0929876	Q5RIV1, Q8JIG3, Q7SZY0	708	11	14912	5.74422	1	0.890242	78.8648
GOTERM_BP_DIRECT	GO:0071108~protein K48-linked deubiquitination	3	0.306748	0.0929876	Q08BW0, X1WEZ5, E7F165	708	11	14912	5.74422	1	0.890242	78.8648
GOTERM_BP_DIRECT	GO:0048854~brain morphogenesis	4	0.408998	0.0930122	F8W3X3, A5WVY0, E7F1U4, A0A0R4IDN1	708	23	14912	3.66298	1	0.885141	78.8739
GOTERM_BP_DIRECT	GO:0000398~mRNA splicing, via spliceosome	8	0.817996	0.093662	Q5RKQ0, Q6PH45, E7F3I8, F1QUB8, E7FAA3, Q802Z5, F1RCY7, A0A0R4J8E6	708	82	14912	2.05484	1	0.881808	79.1136
UP_KEYWORDS	Apoptosis	6	0.613497	0.09865	Q8JFE3, F1QA30, Q9I9N5, Q7ZUQ3, A0A0R4IJ30, A0A0R4IRG9	971	57	22487	2.43775	1	0.5133	73.0222
GOTERM_CC_DIRECT	GO:0000932~cytoplasmic mRNA processing body	5	0.511247	0.0991105	A0A0R4IB26, Q6P6E4, Q1LXS8, F1QFA6, Q6DBW5	657	41	15208	2.82288	1	0.69952	74.9939

## Sheet: Dre-Cat2
Category	Term	Count	%	PValue	Genes	List Total	Pop Hits	Pop Total	Fold Enrichment	Bonferroni	Benjamini	FDR
UP_KEYWORDS	Coiled coil	176	31.3167	1.18646e-25	F8W3F2, X1WBH4, B8JL34, Q5RIV1, Q1LXX4, A0A0R4I9I4, F1QGD0, F1QWT9, Q1LW14, Q6PE21, A0A0R4J6S2, Q1LUQ0, F1RBY2, F1QGS2, F1QM04, A0A0R4IK88, F6NJC6, F1QM84, E7F9F6, F8W2E8, E7EZ31, E7EZ30, E7F064, E7F065, A0A0R4IUB2, E7F049, F1QAE1, X1WDQ3, A2CG09, F1R3B9, Q1LY09, A0A140LH83, R4GEI9, E7F8P9, E7F170, U3JAU0, F1R7S0, A0A0G2KLK6, Q7ZUN2, E7FD72, F1QL50, F1QKJ7, A0A0R4ISB9, E9QEY0, Q5RFW2, F1R420, Q1L…	558	3222	22487	2.20133	1.92206e-23	1.92206e-23	1.43567e-22
GOTERM_CC_DIRECT	GO:0005634~nucleus	137	24.3772	6.95295e-20	F1R9R4, Q8JFV5, Q5RIV1, Q1LXX4, A4IG26, X1WEV9, F1RE03, A0A0R4IUS2, F1R0J2, A0A0R4J6S2, Q1LV27, Q1LUQ0, A0A0R4IK88, F1QM04, P79746, B0S576, K7DY74, A3RK74, A8WIP2, A8E5L7, F1QAE1, B3DKN2, F1QP25, A2CG09, F1Q598, A0A0N4STX9, F1R4T3, Q7ZUN2, F1QL50, E7FD72, A0A0R4IU34, F1QKJ7, A0A0R4ISJ3, A0A0R4ISB9, F1Q7J8, A0A0R4IJ07, Q9DFH2, F1QKM6, Q1L8R2, A0A0R4IFS2, A5WV15, F1R6E0, Q9PVE4, F1QIN2, F1RA39, E7F…	337	2933	15208	2.1079	1.14028e-17	1.14028e-17	8.43101e-17
GOTERM_BP_DIRECT	GO:0006355~regulation of transcription, DNA-templated	78	13.879	4.80528e-13	F1QI87, A8HAM3, Q90YX8, Q1LXX4, Q5RIV1, Q8JHI6, A4IG26, E7F5T6, F1QFA9, A0A0R4J6S2, Q1LV27, F1R0J2, F1QM04, P79746, F1Q5H5, B0S576, F1R0U6, A8E5L7, A3RK74, B3DKN2, F1QP25, F1R598, F1R5H6, A2CG09, F6NQ00, F6NXG0, Q7T177, A0A0R4IPA3, A0A0R4IPR3, A0A0G2KLK6, A0A0R4IJ25, A0A0R4IU34, F1QKJ7, E7F138, A0A0R4ISB9, F1Q7J8, A0A0R4IJ07, Q9DFH2, Q1L8R2, F1QZP2, F1R8Z9, F1R6E0, Q9PVE4, Q1LYM8, A0A0R4ILL4, E7F…	371	1310	14912	2.39323	3.22899e-10	3.22899e-10	7.20668e-10
GOTERM_MF_DIRECT	GO:0003677~DNA binding	68	12.0996	8.70807e-08	F1QI87, A8HAM3, Q90YX8, Q1LXX4, Q5RIV1, A4IG26, A0A0R4J6S2, Q1LV27, F1QGS2, P79746, E7EYR8, F1Q5H5, E7FFR7, K7DY74, B0S576, A8WIP2, A3RK74, F1QJS3, A0A0R4IVN8, F1QAE1, B3DKN2, F1QP25, A0A0R4IQE7, A2CG09, F1QN94, A0A0N4STX9, F6NXG0, A0A0R4IPA3, A0A0G2KLK6, F1R983, A2BGG2, E7F138, I3ISP1, E7FF48, F1R8Z9, Q9PVE4, Q568V0, A0A0R4IIR4, E7F2F7, Q1L8R8, P09014, F1QE20, Q4V9P2, A5PMR0, B7ZD46, A2CEM5, B3D…	392	1393	15797	1.96719	3.55283e-05	3.55283e-05	0.000121811
GOTERM_BP_DIRECT	GO:0006351~transcription, DNA-templated	40	7.11744	9.21066e-06	A0A0R4IJ07, A8HAM3, Q5RIV1, Q8JHI6, B8A483, F1QFA9, Q1LV27, A0A0R4J6S2, F1R0J2, F1R8Z9, F1QM04, P79746, B8A521, F1Q5H5, Q9PVE4, M9MM95, Q1L8R8, P09014, F1QE20, A3RK74, Q32PW3, F1QYS9, B3DKN2, F1R5H6, F1Q5Z1, Q7SXL3, F1R6J3, A0A0R4IH45, A0A0R4IPA3, A0A0R4IPR3, F8W3X2, E7F5J8, A0A0J9YJ42, B3DJK9, F1R3E6, Q1L8S9, A0A0R4IU34, F1RC21, Q1JPY8, F1Q7J8	371	747	14912	2.15229	0.00617047	0.00309001	0.0138134
UP_KEYWORDS	Nucleus	71	12.6335	3.0713e-05	A8HAM3, Q90YX8, Q5RIV1, Q8JHI6, A4IG26, F1QFA9, A0A0R4J6S2, Q1LV27, F1R0J2, Q1LUQ0, F1QM04, A0A0R4IK88, P79746, E7FFR7, B0S576, A3RK74, F1QJS3, B3DKN2, F1R598, F1R5H6, A2CG09, F1QHB8, A0A0R4IPA3, A0A0R4IPR3, F1R983, F1QL50, A0A0R4IU34, A2BGG2, Q6P0U9, F1Q7J8, A0A0R4IJ07, E7FF48, F1QQ92, A0JMQ9, F1R8Z9, Q9PVE4, F1QIN2, F1RA39, Q1ECZ4, A0A0R4IIR4, E7F2F7, Q1JPZ7, Q1L8R8, P09014, F1QE20, A0A0R4IYD9,…	558	1726	22487	1.65773	0.00496323	0.0024847	0.0371579
UP_KEYWORDS	Transcription	36	6.40569	4.41248e-05	A0A0R4IJ07, A8HAM3, Q5RIV1, Q8JHI6, F1QFA9, Q1LV27, A0A0R4J6S2, F1R0J2, F1R8Z9, F1QM04, P79746, Q9PVE4, Q1L8R8, P09014, F1QE20, A3RK74, Q32PW3, F1QYS9, B3DKN2, F1R5H6, F1Q5Z1, Q7SXL3, F1R6J3, A0A0R4IH45, A0A0R4IPA3, A0A0R4IPR3, F8W3X2, E7F5J8, A0A0J9YJ42, B3DJK9, F1R3E6, Q1L8S9, A0A0R4IU34, F1RC21, Q1JPY8, F1Q7J8	558	682	22487	2.12723	0.00712289	0.00237996	0.0533801
GOTERM_BP_DIRECT	GO:0045944~positive regulation of transcription from RNA polymerase II promoter	15	2.66904	5.58538e-05	K7DY74, B0S576, F1QAE1, Q32PW3, A8HAM3, B3DKN2, F1R5H6, F1QXB5, Q1LV27, E7F2Z9, E7FE16, B8A521, E7F5J8, E7F958, F1QE20	371	163	14912	3.69884	0.0368391	0.0124336	0.0837378
GOTERM_MF_DIRECT	GO:0043565~sequence-specific DNA binding	32	5.69395	0.000194466	Q90YX8, F1QZP2, Q1LXX4, A4IG26, A0A0R4J6S2, Q1LV27, F1R8Z9, P79746, F1R6E0, F1QQA8, Q9PVE4, Q568V0, P09014, K7DY74, B0S576, A3RK74, X1WBP4, Q32PW3, B3DGA5, A2CEM5, F1QYS9, B3DKN2, F1QP25, F6NWW8, F1R6J3, F8W3X2, B3DJK9, F1R2J1, F1R3E6, F1QKJ7, Q6YI96, E7F138	392	625	15797	2.06328	0.0762832	0.0388981	0.27168
GOTERM_MF_DIRECT	GO:0046872~metal ion binding	90	16.0142	0.000265705	Q1LUU8, Q8JFV5, E7F3S4, B8JL34, F1QH89, X1WCH5, Q1LUQ0, X1WHY2, E7F350, A0A0R4IK88, E7FFR7, F1QLB1, F1Q949, F8W2E8, F1QW97, E9QG09, F1QPU2, A8E7I7, A0A0R4IVN8, B0S5D8, A0A0R4IA21, B3DKN2, A0A0R4IQE7, F1R598, A2CG09, F6NIE2, B0UXW1, F1QHB8, F6NXG0, F1R4T3, E7FE34, Q7T177, A0A0R4IPA3, A0A0R4IPR3, F1R7S0, X1WGH7, F1RCS0, A0A0G2KIM8, B8K0C8, A2BGG2, Q6P0U9, A0A0R4ISB9, X1WH58, F1QI44, F1R2T0, F6PBE4,…	392	2528	15797	1.43468	0.102751	0.0354954	0.371034
UP_KEYWORDS	Transcription regulation	32	5.69395	0.00029052	A0A0R4IJ07, A8HAM3, Q5RIV1, Q8JHI6, F1QFA9, Q1LV27, F1R0J2, F1R8Z9, F1QM04, P79746, Q9PVE4, Q1L8R8, P09014, F1QE20, A3RK74, Q32PW3, B3DKN2, F1R5H6, F1Q5Z1, Q7SXL3, F1R6J3, A0A0R4IH45, A0A0R4IPA3, A0A0R4IPR3, F8W3X2, E7F5J8, A0A0J9YJ42, Q1L8S9, A0A0R4IU34, F1RC21, Q1JPY8, F1Q7J8	558	636	22487	2.02764	0.0459804	0.0116988	0.350977
GOTERM_MF_DIRECT	GO:0003700~transcription factor activity, sequence-specific DNA binding	32	5.69395	0.000538461	Q1LXX4, Q5RIV1, F1QZP2, A0A0R4J6S2, F1R8Z9, F1QGS2, P79746, F1R6E0, Q9PVE4, E7FFR7, Q568V0, A0A0R4IIR4, Q1L8R8, P09014, B0S576, A3RK74, X1WBP4, A2CEM5, F1QYS9, B3DKN2, A0A0R4IQE7, Q6TEL2, E7F2Z9, E7EYK0, F1R6J3, E7FE16, Q7T177, F8W3X2, B3DJK9, F1R3E6, F1QKJ7, E7F138	392	663	15797	1.94502	0.197282	0.053456	0.750584
GOTERM_MF_DIRECT	GO:0044212~transcription regulatory region DNA binding	9	1.60142	0.00056924	B0S576, F1R6E0, F1QQA8, E7FFR7, Q32PW3, X1WBP4, F1QP25, E7F2Z9, E7FE16	392	76	15797	4.77219	0.207304	0.0454003	0.79333
GOTERM_MF_DIRECT	GO:0003676~nucleic acid binding	54	9.60854	0.000791827	A0A0G2L234, Q1LUU8, B8JL34, F1QH89, Q6PE21, F1RE03, X1WHY2, E7EYR8, Q6NWH7, F1Q949, F8W2E8, F1QW97, E9QG09, A0A0R4IUB2, A0A0R4IA21, A0A0R4IQE7, F6NIE2, F1QHB8, F1R4T3, F1R4G7, Q7T177, A0A0R4IBT0, E9QEE4, A0A0R4ISJ3, A2BGG2, X1WH58, F1QBS1, F1R2T0, A0A0R4IN50, Q1L8R2, F1R6E0, F1QQA8, B8A688, F1QAP4, A2BIA1, I3IS56, I3IT94, F1QTN3, Q6P0F4, G1K2G6, A2BFS7, X1WBP4, A0A0R4IUL8, H0WE41, E7F342, F1QAC0,…	392	1375	15797	1.58263	0.276166	0.0524405	1.10195
GOTERM_MF_DIRECT	GO:0008017~microtubule binding	12	2.13523	0.00086527	B0S8J1, F1QXP6, E7FCT0, E7F084, E7FCQ1, Q1LW14, A0A140LGY7, E7F064, E7FDX9, F1QPR6, A0A0R4IJ30, A3KPT4	392	143	15797	3.38169	0.297551	0.049203	1.20358
GOTERM_MF_DIRECT	GO:0000981~RNA polymerase II transcription factor activity, sequence-specific DNA binding	14	2.4911	0.000962146	A3RK74, Q9DFH2, F1QP25, F1R6J3, Q1LV27, F1R8Z9, E7EYR8, Q568V0, B3DJK9, F1R3E6, M9MM95, F1QW97, E7F138, Q4V9P2	392	191	15797	2.95381	0.324799	0.0479075	1.3375
GOTERM_BP_DIRECT	GO:0030705~cytoskeleton-dependent intracellular transport	5	0.88968	0.00107563	B0S8J1, E7FCT0, E7F084, Q1LW14, E7FDX9	371	19	14912	10.5774	0.51481	0.165401	1.60117
GOTERM_MF_DIRECT	GO:0008270~zinc ion binding	50	8.8968	0.00116636	A0A0G2L234, E9QCD3, F1QQ05, X1WHY2, Q1LUQ0, A0A0R4IK88, E7FEA4, E7F5K6, F1Q949, F1QXU6, F1QV96, A8E7I7, A0A0R4IVN8, B3DKN2, F1R598, A2CG09, F1QHB8, B0UXW1, A0A0R4IPA3, A0A0R4ICL5, A0A0R4IPR3, A0A0R4IBT0, F1R984, B8K0C8, A2BGG2, A0A0R4ISB9, X1WHI6, F1QYM0, Q5RFW2, Q5RFW5, A0JMQ9, B8A483, F1R833, F6P2R0, Q9PVE4, A0A0H2UKN4, F1RA39, E7F2F7, A0A0R4IXX0, A5PMR0, B7ZD46, Q32PW3, E7F2S4, A4IFZ0, E7FE16,…	392	1266	15797	1.59157	0.37883	0.0515305	1.61923
UP_KEYWORDS	Activator	12	2.13523	0.00124327	E7F5J8, A0A0J9YJ42, Q8JHI6, F1QFA9, F1R0J2, F1R6J3, F1RC21, F1R8Z9, F1Q7J8, Q1JPY8, A0A0R4IH45, F1QM04	558	149	22487	3.24558	0.182525	0.0395055	1.49408
UP_KEYWORDS	Zinc-finger	33	5.87189	0.00263035	Q5RFW2, Q5RFW5, B8JL34, A0JMQ9, B8A483, Q1LUQ0, X1WHY2, Q9PVE4, A0A0R4IQ67, I3IS56, F8W2E8, E7F2F7, A0A0R4IXX0, A8E7I7, B7ZD46, A0A0R4IVN8, B3DKN2, A4IFZ0, F1R598, A2CG09, A0A0R4IR19, F1QHB8, E7FE34, A0A0R4IPR3, F8W3X2, F1RCS0, Q1L8S9, Q5RHY8, F1QV68, A0A0R4ISB9, Q6P0U9, Q5TYQ8, E7F6V1	558	760	22487	1.74984	0.347327	0.0686435	3.1368
GOTERM_BP_DIRECT	GO:0007018~microtubule-based movement	8	1.42349	0.00342688	E7F170, B0S8J1, E7F049, E7FCT0, E7F084, Q1LW14, E7FDX9, F1QPR6	371	79	14912	4.07029	0.900423	0.369577	5.01824
GOTERM_BP_DIRECT	GO:0000398~mRNA splicing, via spliceosome	8	1.42349	0.00422002	F1R4G7, A0A0R4IBT0, F1QAP4, F1QQV6, E9QEE4, A7YT51, Q1JPY8, A5WV15	371	82	14912	3.92137	0.941683	0.37727	6.1457
GOTERM_BP_DIRECT	GO:0006357~regulation of transcription from RNA polymerase II promoter	15	2.66904	0.00676618	A8E5L7, F1QKM6, Q1LXX4, F1QFA9, F1R6J3, Q1LV27, F1QN94, F1QM04, P79746, E7F640, E7FFR7, Q6NWH7, F1QW97, Q6YI96, A0A0R4IYD9	371	266	14912	2.26658	0.989562	0.478872	9.68127
GOTERM_MF_DIRECT	GO:0018024~histone-lysine N-methyltransferase activity	5	0.88968	0.0068555	A0A0R4IPA3, F1QJI9, F1R598, E7F2F7, F1QV68	392	31	15797	6.49975	0.939595	0.244721	9.17419
GOTERM_BP_DIRECT	GO:0006366~transcription from RNA polymerase II promoter	7	1.24555	0.00773493	F1R6E0, F1QQA8, X1WBP4, A0A0R4IIR4, Q7SXL3, F1R3R6, A0A0R4J6S2	371	70	14912	4.01941	0.994582	0.479133	10.9935
UP_KEYWORDS	Zinc	41	7.29537	0.00852073	Q5RFW2, Q5RFW5, B8JL34, A0JMQ9, B8A483, F1R833, Q1LUQ0, X1WHY2, A0A0R4IK88, Q9PVE4, F1RA39, A0A0R4IQ67, I3IS56, F8W2E8, E7F2F7, A0A0R4IXX0, A8E7I7, B7ZD46, A0A0R4IVN8, B3DKN2, A4IFZ0, F1R598, A0A0R4IBF6, A2CG09, A0A0R4IR19, F1QHB8, B0UXW1, E7FE34, A0A0R4IPA3, A0A0R4IPR3, F8W3X2, F1R7S0, F8W4U4, F1RCS0, Q1L8S9, Q5RHY8, B8K0C8, F1QV68, Q6P0U9, A0A0R4ISB9, Q5TYQ8, E7F6V1	558	1088	22487	1.51863	0.749995	0.179662	9.83662
GOTERM_BP_DIRECT	GO:0006281~DNA repair	11	1.9573	0.00923796	F1QPU2, F1QJS3, F1QJB6, F1R983, E7F6Y7, F1Q5Z1, B0V1A9, A0A0R4IU34, F1R3B9, A0A0R4IR19, Q4U0V3	371	168	14912	2.63175	0.998044	0.499913	12.9943
GOTERM_CC_DIRECT	GO:0005871~kinesin complex	6	1.06762	0.00965184	B0S8J1, E7FCT0, E7F084, Q1LW14, E7FDX9, F1QPR6	337	59	15208	4.58925	0.796195	0.548552	11.0953
GOTERM_MF_DIRECT	GO:0003682~chromatin binding	10	1.77936	0.0100882	B0S576, Q9DFH2, Q1L8E1, Q32PW3, B3DKN2, F1R5H6, A0A0R4ISB9, A2VCY3, F1R935, A0A0G2LAQ7	392	145	15797	2.7792	0.984027	0.313452	13.2233
GOTERM_MF_DIRECT	GO:0003777~microtubule motor activity	7	1.24555	0.0119956	E7F170, B0S8J1, E7FCT0, E7F084, Q1LW14, E7FDX9, F1QPR6	392	77	15797	3.6635	0.992729	0.33656	15.5332
GOTERM_BP_DIRECT	GO:0007005~mitochondrion organization	4	0.711744	0.0126254	E7F2S4, F1R310, Q6PBS8, A0A0R4IJ30	371	20	14912	8.03881	0.999804	0.574219	17.3507
GOTERM_MF_DIRECT	GO:0005096~GTPase activator activity	12	2.13523	0.0142312	E7FD67, E9QFT2, E7EXM8, E7FBF9, E9QJB3, E7FA51, A0JMP3, F1QXM3, E7F065, X1WES7, E7F8P9, Q6T9C3	392	207	15797	2.33614	0.997114	0.362276	18.1678
GOTERM_BP_DIRECT	GO:0051216~cartilage development	7	1.24555	0.015284	Q9DFH2, B6V3E1, F1QQ92, B7ZDE9, A2CG09, Q1LWH3, A0A0R4IYD9	371	81	14912	3.47356	0.999968	0.609732	20.6262
GOTERM_CC_DIRECT	GO:0005814~centriole	4	0.711744	0.030433	Q8JGS1, F1R310, F1QL50, F1RB74	337	31	15208	5.82292	0.993708	0.815391	31.2543
UP_KEYWORDS	DNA-binding	34	6.04982	0.0307653	A8HAM3, Q90YX8, Q1LXX4, Q5RIV1, A4IG26, Q1LV27, A0A0R4J6S2, F1R8Z9, P79746, Q9PVE4, Q568V0, Q1L8R8, P09014, F1QE20, A3RK74, F1QAE1, B3DGA5, A2CEM5, F1QYS9, B3DKN2, E7F342, F6NWW8, Q7SXL3, F1R6J3, F8W3X2, F1R983, B3DJK9, F1R2J1, F1R3E6, Q1L8S9, Q6YI96, A2BGG2, F1RC21, E7F138	558	944	22487	1.45146	0.993669	0.468888	31.4853
GOTERM_BP_DIRECT	GO:0007519~skeletal muscle tissue development	5	0.88968	0.0308097	F1Q9J0, F1QXB5, F1Q6P3, A0A0R4IXX0, E7FH53	371	48	14912	4.18688	1	0.826657	37.4597
GOTERM_BP_DIRECT	GO:0000122~negative regulation of transcription from RNA polymerase II promoter	8	1.42349	0.0323608	B0S576, E7FF48, A8WIP2, F1QQA8, Q1LYM8, F1QAE1, F8W4E9, F1R6J3	371	122	14912	2.63568	1	0.817403	38.9441
GOTERM_MF_DIRECT	GO:0003723~RNA binding	19	3.38078	0.0335105	B8JL34, Q802Z0, E7F981, E7FB74, A5WV15, E7F350, F1R4G7, F1QIN2, A0A0R4IBT0, E9QEE6, F1Q949, F8W2E8, Q1ECZ4, E9QEE4, A2BGG2, A0A0R4IUB2, F1R9I0, Q1JPY8, Q5TYQ8	392	453	15797	1.69022	0.999999	0.629659	37.9226
GOTERM_MF_DIRECT	GO:0008574~ATP-dependent microtubule motor activity, plus-end-directed	3	0.533808	0.0342324	B0S8J1, E7FCT0, E7FDX9	392	12	15797	10.0746	0.999999	0.612265	38.568
GOTERM_BP_DIRECT	GO:0021551~central nervous system morphogenesis	3	0.533808	0.0343834	F1RCS0, A0JMQ9, E7FD72	371	12	14912	10.0485	1	0.813522	40.8304
GOTERM_CC_DIRECT	GO:0005694~chromosome	8	1.42349	0.0347518	A0A0R4IPA3, A0A0J9YJ42, F1QJI9, E7F342, F1R5H6, E7F2F7, A0A0R4IR19, A3KPT4	337	139	15208	2.59727	0.996974	0.765469	34.8768
GOTERM_BP_DIRECT	GO:0048701~embryonic cranial skeleton morphogenesis	5	0.88968	0.0373705	B0S576, B6V3E1, F1QNY7, F1QQ92, F1R0Z0	371	51	14912	3.9406	1	0.81846	43.517
GOTERM_BP_DIRECT	GO:0043009~chordate embryonic development	8	1.42349	0.0375672	Q5RFW2, E7F640, E7F5J8, F1QQ92, F1QP25, F1R7R1, A0A0R4IGP2, A0A0R4IJ30	371	126	14912	2.552	1	0.799757	43.6899
GOTERM_BP_DIRECT	GO:0045893~positive regulation of transcription, DNA-templated	7	1.24555	0.0397722	Q6NWH7, Q5RIV1, A2CEM5, F1QP25, M9MM95, Q1LV27, F1QBS1	371	101	14912	2.78573	1	0.798968	45.5941
GOTERM_MF_DIRECT	GO:0000976~transcription regulatory region sequence-specific DNA binding	4	0.711744	0.0405496	Q1L8R2, B3DKN2, F1QE20, Q1JPY8	392	31	15797	5.1998	1	0.652004	43.9564
UP_KEYWORDS	Bromodomain	4	0.711744	0.0440815	A0A0R4IVN8, F1RCN2, A0A0R4IJ25, F1R5H6	558	32	22487	5.03741	0.999327	0.555803	42.0461
GOTERM_MF_DIRECT	GO:0032947~protein complex scaffold	3	0.533808	0.0456953	F1Q897, A0A0R4IGT8, Q66HX5	392	14	15797	8.63539	1	0.674546	48.0174
GOTERM_MF_DIRECT	GO:0001078~transcriptional repressor activity, RNA polymerase II core promoter proximal region sequence-specific binding	4	0.711744	0.0474867	F1QQA8, F1QAE1, F1QZP2, F1R4T3	392	33	15797	4.88466	1	0.668047	49.3659
GOTERM_MF_DIRECT	GO:0003779~actin binding	12	2.13523	0.0483892	A0A0R4IGJ6, Q5RHD8, E7EZ28, F8W4U4, F1RA39, F1R7P5, F1R833, E7EZ30, B0S6V2, A0A0R4IS11, A0A0R4IXX0, Q6GQN5, A0A0R4IK88	392	251	15797	1.92662	1	0.655299	50.0329
GOTERM_MF_DIRECT	GO:0005515~protein binding	11	1.9573	0.0486919	Q8JGS1, E7FCY1, A0A0R4IZE2, Q9PVE4, Q9DFH2, Q8UWD5, Q5RIV1, A0A0R4J6S2, F1QNH9, Q2Q551, F1R4T3	392	221	15797	2.00581	1	0.638796	50.2548
GOTERM_MF_DIRECT	GO:0032051~clathrin light chain binding	2	0.355872	0.048892	Q6P4P6, B8JIP8	392	2	15797	40.2985	1	0.622396	50.4009
GOTERM_CC_DIRECT	GO:0016607~nuclear speck	4	0.711744	0.0510712	F1QIN2, Q1ECZ4, Q1JPY8, Q5TYQ8	337	38	15208	4.75027	0.999815	0.820831	47.041
GOTERM_BP_DIRECT	GO:0050727~regulation of inflammatory response	3	0.533808	0.0521045	F1R5H6, E7F5T6, A0A0R4IPR2	371	15	14912	8.03881	1	0.864359	55.1824
GOTERM_BP_DIRECT	GO:0006397~mRNA processing	7	1.24555	0.056087	F8W2E8, Q1ECZ4, F8W2E1, Q1JPZ7, G1K2G6, Q5TYQ8, A5WV15	371	110	14912	2.5578	1	0.870167	57.9249
GOTERM_BP_DIRECT	GO:0006974~cellular response to DNA damage stimulus	7	1.24555	0.0581151	F1R4R4, F1QJB6, F1R983, F1Q5Z1, A0A0R4IU34, A0A0R4IR19, Q6DBR4	371	111	14912	2.53476	1	0.86624	59.2606
GOTERM_BP_DIRECT	GO:0001947~heart looping	7	1.24555	0.0581151	B0BF33, F1RA39, F1QQ92, F1QX08, F1R6J3, F1Q654, F1R8Z9, A0A0R4IK88	371	111	14912	2.53476	1	0.86624	59.2606
GOTERM_MF_DIRECT	GO:0051087~chaperone binding	3	0.533808	0.0583457	F1QVZ5, F1Q9J0, F1QGM6	392	16	15797	7.55596	1	0.672051	56.8692
UP_KEYWORDS	Mitosis	5	0.88968	0.0675458	F1QAL7, F1R983, Q6DBR4, E7F350, A3KPT4	558	62	22487	3.24994	0.999988	0.677919	57.098
UP_KEYWORDS	Methyltransferase	7	1.24555	0.0687201	A0A0R4IPA3, F1R1K5, F1QJI9, F1R598, E7F2F7, A0A0A0MPU6, F1QV68	558	116	22487	2.43185	0.99999	0.649542	57.7472
GOTERM_MF_DIRECT	GO:0046983~protein dimerization activity	9	1.60142	0.0697654	E7F5J8, A8HAM3, Q5RIV1, M9MM95, Q1LV27, F1QE20, F1RC21, Q9IAJ4, A0A0R4IX50	392	175	15797	2.07249	1	0.722759	63.6367
GOTERM_BP_DIRECT	GO:0031338~regulation of vesicle fusion	4	0.711744	0.0718803	E7FBF9, E7FA51, F1QXM3, E7F8P9	371	39	14912	4.12247	1	0.908097	67.3323
GOTERM_MF_DIRECT	GO:0004534~5'-3' exoribonuclease activity	2	0.355872	0.0724363	A0A0R4ISJ3, E7F350	392	3	15797	26.8656	1	0.721488	65.0702
GOTERM_BP_DIRECT	GO:0051294~establishment of spindle orientation	2	0.355872	0.0726098	E7FD67, R4GEI9	371	3	14912	26.796	1	0.899996	67.7153
GOTERM_BP_DIRECT	GO:0008104~protein localization	3	0.533808	0.0795685	B0S8J1, E7FCT0, E7FDX9	371	19	14912	6.34643	1	0.9113	71.1639
GOTERM_BP_DIRECT	GO:0042462~eye photoreceptor cell development	3	0.533808	0.0870066	F1Q949, Q8JHI6, F1QEZ1	371	20	14912	6.02911	1	0.92182	74.4679
GOTERM_BP_DIRECT	GO:0090630~activation of GTPase activity	4	0.711744	0.0953426	E7FBF9, E7FA51, F1QXM3, E7F8P9	371	44	14912	3.65401	1	0.932346	77.7495
GOTERM_BP_DIRECT	GO:0001502~cartilage condensation	2	0.355872	0.095625	A2CG09, G1K2E7	371	4	14912	20.097	1	0.925565	77.8534
GOTERM_BP_DIRECT	GO:0060088~auditory receptor cell stereocilium organization	2	0.355872	0.095625	F1R8Z9, G1K2E7	371	4	14912	20.097	1	0.925565	77.8534
GOTERM_MF_DIRECT	GO:0042393~histone binding	4	0.711744	0.0998306	A0A0R4IJ25, F1R5H6, A0A0R4ISB9, F1R935	392	45	15797	3.58209	1	0.82029	77.0345

## Sheet: Dre-Cat3
Category	Term	Count	%	PValue	Genes	List Total	Pop Hits	Pop Total	Fold Enrichment	Bonferroni	Benjamini	FDR
UP_KEYWORDS	Coiled coil	237	26.6292	2.10138e-23	F1QS46, A0A0R4IED0, F1QUB9, Q5RJ79, F1QT45, E7FFM2, E7F0W1, Q9DGG8, E7F6G2, A2BDR7, F1QNW4, C5J7W8, F1QNW2, E7F186, A0A0R4IGM2, F1Q8F1, F1Q4X8, F1QPC4, A0A140LH83, B0UYE9, F1QQ50, F1QGK5, F1QGK3, F1QRC1, A0A0R4IM77, E9QC10, Q66ID3, F1QYU0, E7F513, Q5RGW0, F1QQ52, Q7ZVR1, A0A0R4IRV6, F1R6V5, E7F9W4, F1Q793, F1QGN5, F1RE30, E9QCS7, F1QK82, F1R7R1, X1WEJ1, E7F3M3, F1QRR4, F1QE08, F1R5A6, E7FF14, A2R…	881	3222	22487	1.87749	4.32884e-21	4.32884e-21	2.64661e-20
GOTERM_CC_DIRECT	GO:0005634~nucleus	170	19.1011	2.0663e-09	F1QEM2, F1QS46, Q1LYP4, Q7ZVI2, F1R1Z6, Q6PBM7, Q1LUQ0, A0A0R4IKA2, Q7ZTI0, F1QVT3, F1R345, P79741, F8W381, A0A140LG17, C5J7W8, F1QNW2, Q802Z5, F1R7K2, Q30JB6, A0A0R4IGM2, Q6P984, F1QDF8, Q503J8, E7FDD8, F6NI81, F1RCC6, F1R1C2, A0A0R4IDE2, F1Q618, A2CF49, F1QJX1, E9QC10, F1QBW6, Q6DGE6, Q8UVK2, F1RCC9, B0V3D1, F1QQ52, Q7ZVR1, A0A0R4IRV6, A0A0R4IW61, P59723, Q6GMI3, E7F4J7, B8A5S8, F1QGN5, E7F525,…	577	2933	15208	1.52768	4.91779e-07	4.91779e-07	2.66354e-06
UP_KEYWORDS	Methyltransferase	17	1.91011	1.17881e-05	F1R9X2, F1R9N4, B8JIA4, A0A0G2L2R7, E7FDI9, A5WW99, A0A0R4IPA3, F1QJX1, F1QUR9, Q5U3H2, Q58EM4, A0A0A0MPU6, F1QXL2, F1QY85, F1R7U4, A9C3Q7, A8WHR1	881	116	22487	3.74065	0.00242543	0.00121345	0.0148457
GOTERM_CC_DIRECT	GO:0005814~centriole	9	1.01124	1.47043e-05	F1R3P9, F1QCU5, Q1LV44, F1QE08, F1R310, Q6GQN0, F1QNW2, A2CEH0, F1RB74	577	31	15208	7.65204	0.00349354	0.0017483	0.0189528
GOTERM_MF_DIRECT	GO:0008168~methyltransferase activity	18	2.02247	4.27684e-05	F1R9X2, F1R9N4, B8JIA4, A0A0G2L2R7, E7FDI9, A5WW99, A0A0R4IPA3, F1QJX1, A0A0R4IJY0, F1QUR9, Q5U3H2, Q58EM4, A0A0A0MPU6, F1QXL2, F1QY85, F1R7U4, A9C3Q7, A8WHR1	584	151	15797	3.22446	0.030532	0.030532	0.0647808
GOTERM_MF_DIRECT	GO:0003677~DNA binding	80	8.98876	7.39764e-05	Q90477, F1QP75, Q1LYP4, F1R9N4, Q7ZVI2, F1QS04, Q6DC85, Q4JNX5, Q6P013, A0A0R4I9V4, F1QQ02, E9QDD4, B0R147, Q1LWL8, F1R345, A1L2F3, Q30JB6, F1QQC9, Q6P984, F1QDF8, Q5TYS1, F6NI81, A0A0R4IRI6, A0A0R4IQE7, Q5TZC4, A0A0R4IDE2, E7FFJ6, B3DHZ4, A0A0R4IPA3, F6NN58, F1QK90, Q0II00, A0A0R4ILV6, Q6DGE6, F1QTW3, F1R983, Q8UVK2, B0V3D1, F1QQ52, I3ISP1, Q9DGM8, Q6GMI3, E7F4J7, B8A5S8, F1QJ31, A1L224, E7FCK8,…	584	1393	15797	1.55346	0.0522219	0.026461	0.112026
UP_KEYWORDS	Cytoskeleton	23	2.58427	8.44585e-05	F1R3P9, F1R764, F1QFM8, F1QCU5, Q1LV44, Q6PHE8, R4GEM8, Q6GQN0, E9QFU9, A0A0G2L8X4, A2CEH0, Q1RM03, F1RB74, A0A0R4IPT9, F1QRC1, Q5RII9, A0A140LH62, F1R345, F1QZA3, F1R310, E7FCN8, A1L2F3, F1QNW2	881	226	22487	2.59762	0.0172487	0.00578294	0.10632
GOTERM_MF_DIRECT	GO:0018024~histone-lysine N-methyltransferase activity	8	0.898876	0.000109204	A0A0R4IPA3, F1QJX1, Q5U3H2, Q503J8, B8JIA4, E7FDI9, F1QXL2, F1QY85	584	31	15797	6.98056	0.0761239	0.0260472	0.165332
GOTERM_BP_DIRECT	GO:0032259~methylation	16	1.79775	0.000112577	F1R9X2, F1R9N4, B8JIA4, A0A0G2L2R7, E7FDI9, A5WW99, A0A0R4IPA3, F1QJX1, F1QUR9, Q5U3H2, Q58EM4, F1QXL2, F1QY85, F1R7U4, A9C3Q7, A8WHR1	586	125	14912	3.25723	0.114588	0.114588	0.179483
GOTERM_MF_DIRECT	GO:0003700~transcription factor activity, sequence-specific DNA binding	45	5.05618	0.000123666	A0A0R4IRV6, Q7ZVI2, F1QZP2, F1QS04, Q6DC85, Q6GMI3, F1R1Z6, Q4JNX5, C4XVB5, A1L224, E7FCK8, F1QVT3, Q1LWL8, A0A0R4IIR4, F1QEY1, B8A606, Q8AV71, F1QRF9, A0A140LG17, Q68EL6, Q30JB6, Q5RFV1, F1QVQ9, F1QDF8, B7SEE0, Q5TYS1, A0A0R4IRI6, A0A0R4IQE7, Q5TZC4, F1R0K1, B3DG99, F1Q573, A2RUX8, X1WBC8, E7EZ03, Q1LV18, A0A0R4IB37, Q0II00, Q6DGE6, F1R609, Q8UVZ0, Q8UVK2, E7FA97, F1QLZ5, F1QPF2, F1QQ52	584	663	15797	1.83595	0.0857613	0.0221665	0.187208
GOTERM_BP_DIRECT	GO:0042384~cilium assembly	15	1.68539	0.000134058	F8W5U4, F1R764, F1QFM8, F1QDF8, F1RBQ8, F1QX08, F1QZA3, F1R310, E7FCN8, Q6GQN0, F1Q654, F1QIK5, A2CEH0, F1QNW2, A0A0R4IFG5	586	113	14912	3.37793	0.134914	0.0698999	0.213695
UP_KEYWORDS	S-adenosyl-L-methionine	14	1.57303	0.00017303	F1R9X2, F1R9N4, B8JIA4, E7FDI9, A5WW99, A0A0R4IPA3, F1QUR9, Q5U3H2, Q58EM4, A0A0A0MPU6, F1QXL2, F1RB14, F1QY85, F1R7U4	881	102	22487	3.50335	0.0350194	0.00887224	0.217706
GOTERM_CC_DIRECT	GO:0005930~axoneme	7	0.786517	0.000215927	E7F630, F1R764, F1QRC1, F1QZA3, A0A0G2L8X4, F1Q654, A0A0R4IFG5	577	24	15208	7.68746	0.0500977	0.0169861	0.277981
GOTERM_BP_DIRECT	GO:0045944~positive regulation of transcription from RNA polymerase II promoter	18	2.02247	0.00023018	E7F3Z5, Q90477, Q4U3K9, F1QS04, F1QXB5, A0A0R4IKI2, E7FDI9, B8A5S8, C4XVB5, X1WBC8, A1L224, B8A521, A0A0R4IB37, E7F958, F1QYY6, Q0II00, Q6DGE6, B8A606, Q802D2	586	163	14912	2.81011	0.220305	0.0796038	0.366655
GOTERM_CC_DIRECT	GO:0005856~cytoskeleton	26	2.92135	0.000309341	F1QCU5, F1QFM8, Q1LV44, E9QFU9, Q6GQN0, Q1RM03, A2CEH0, F1Q733, F1Q6T9, Q9DGG8, F8W4H3, F1QNW2, A1L2F3, F1R764, B0V237, Q6PHE8, F1R5C7, F1Q4X8, F1RB74, A0A0R4IPT9, F1QRC1, Q5RII9, A0A140LH62, F1QZA3, A0A0R4IG34, F1R310	577	309	15208	2.21774	0.0709888	0.0182402	0.39802
GOTERM_CC_DIRECT	GO:0005730~nucleolus	15	1.68539	0.000806588	F1R9W2, A0A0R4IXF1, A2CEY8, E7F0U9, F1RB74, A0A0R4IH55, Q1LVK9, P79741, F1QGN5, F1QRH4, B8JLP0, A1L2F3, Q1JPY8, Q7ZVR1, Q503Z6	577	139	15208	2.84428	0.174731	0.0376808	1.03475
GOTERM_BP_DIRECT	GO:0035082~axoneme assembly	5	0.561798	0.00090211	E7F630, F1QZA3, Q6GQN0, F1Q654, F1QNW2	586	12	14912	10.603	0.623042	0.216438	1.42978
GOTERM_CC_DIRECT	GO:0005813~centrosome	12	1.34831	0.000998505	F8W5U4, E7F0K2, F1QCU5, Q1LV44, Q5RII9, E7FDD8, F1QE08, F1QW15, F1R310, E9QFU9, Q5TZ43, F1QVM8	577	96	15208	3.29463	0.21161	0.0388523	1.2795
GOTERM_BP_DIRECT	GO:0007099~centriole replication	4	0.449438	0.00186775	F1R3P9, F1QCU5, Q1LV44, F1RB74	586	7	14912	14.5412	0.867468	0.33248	2.93902
GOTERM_MF_DIRECT	GO:0043021~ribonucleoprotein complex binding	4	0.449438	0.00243723	P79741, A0A0R4IZ84, F1R7R1, F1R3N8	584	8	15797	13.5248	0.829521	0.298005	3.62974
GOTERM_MF_DIRECT	GO:0016971~flavin-linked sulfhydryl oxidase activity	3	0.337079	0.00397931	B0UXN0, A4QNU9, F1QJL3	584	3	15797	27.0497	0.944466	0.382325	5.8624
GOTERM_BP_DIRECT	GO:0007067~mitotic nuclear division	10	1.1236	0.0043695	A0A0R4IPT9, F1QCU5, A5PMM5, Q5RII9, F1R983, B0V123, Q5RIL6, A1L2F3, A0A0R4IU07, E7F350	586	81	14912	3.14162	0.991207	0.545684	6.74894
GOTERM_BP_DIRECT	GO:0006355~regulation of transcription, DNA-templated	71	7.97753	0.00477518	Q90477, E9QGK5, Q1LYP4, Q7ZVI2, F1QS04, Q6DC85, F1R1Z6, E7FDI9, Q4JNX5, A0A0R4IKA2, F1QQ02, F1QVT3, A0A0R4IR86, Q1LWL8, A0A140LG17, Q802Z5, Q30JB6, Q6P984, F1QDF8, B0S8H2, B7SEE0, Q5TYS1, Q1L8H2, F6NI81, Q5TZC4, A0A0R4IDE2, E7FFJ6, B3DHZ4, A0A0R4IPA3, Q0II00, Q6DGE6, F1QTW3, F1R609, Q8UVK2, B0V3D1, B8A4W5, P59723, F1QZP2, Q6GMI3, F1QQB3, A1L224, E7FCK8, A0A0R4IIR4, F1QEY1, F1QRF9, Q68EL6, F1QXL2,…	586	1310	14912	1.37919	0.99434	0.5225	7.35339
GOTERM_BP_DIRECT	GO:0061053~somite development	6	0.674157	0.0049644	F1QEZ3, A0A0R4II20, F8W381, B0S5Q0, A0A0R4IDN1, Q802Z5	586	29	14912	5.26492	0.995392	0.489562	7.63406
GOTERM_BP_DIRECT	GO:0007634~optokinetic behavior	4	0.449438	0.00586284	A0A0R4II20, P59015, A0A0R4IDN1, A2CEH0	586	10	14912	10.1788	0.998264	0.506516	8.95587
UP_KEYWORDS	Nucleus	89	10	0.00643312	Q90477, F1QEM2, Q1LYP4, F1R9N4, F1QS04, Q6DC85, B8JIA4, B0S5C8, E7FDI9, Q4JNX5, Q1LUQ0, A0A0R4IKA2, A0A0R4IU07, F1QQ02, A0A0R4IR86, P79741, F1R345, Q1LWL8, Q6DGX3, F1QNW2, A1L2F3, Q30JB6, A0A0R4IGM2, Q6P984, F1QDF8, Q5TYS1, F6NI81, Q5TZC4, A0A0R4IDE2, B3DHZ4, F1QEZ3, A0A0R4IPA3, F1QJX1, E9QC10, F6NN58, Q1LVK9, Q6DGE6, F1R983, F1QTW3, Q8UVK2, B0V3D1, F1QQ52, Q7ZVR1, F1R9W2, A0A0R4IW61, R4GEM8, P59…	881	1726	22487	1.31615	0.735391	0.233485	7.80685
GOTERM_BP_DIRECT	GO:0006281~DNA repair	15	1.68539	0.00644487	F1QPU2, R4GEM8, E7F4J7, A0A0R4IU07, E7F0W1, F1QK90, F1R983, B3DJT4, E7F6Y7, E7F6N8, A0A0R4IAE0, C5J7W8, F1QQM4, U3JAR8, F1QQC9	586	168	14912	2.27206	0.999078	0.50289	9.80268
GOTERM_MF_DIRECT	GO:0003690~double-stranded DNA binding	6	0.674157	0.00678584	E9QC10, Q503J8, Q1L8H2, A0A0R4IAE0, F1QQB3, F1QQC9	584	33	15797	4.91812	0.99282	0.505997	9.80225
GOTERM_BP_DIRECT	GO:0001755~neural crest cell migration	10	1.1236	0.00699048	F1QNC4, F1QQ50, E7FBE1, F1QRR4, E9QD84, F1QGW9, Q90XD1, F1R5S1, F1QR50, A1L2F3	586	87	14912	2.92495	0.999491	0.498116	10.5898
UP_KEYWORDS	Cilium	8	0.898876	0.0072703	F1R764, F1QRC1, F1QZA3, Q6GQN0, A0A0G2L8X4, F1RB29, F1Q654, F1QNW2	881	58	22487	3.52061	0.777572	0.221608	8.78047
GOTERM_MF_DIRECT	GO:0003676~nucleic acid binding	69	7.75281	0.00759683	Q1LUU8, Q1LYP4, E7F2K0, F1QUB8, Q5RGB7, A0A0R4IKA2, Q7ZTI0, F1QQ02, F1Q8Z0, F1QLW8, Q6DG94, F1R345, F1RE12, F8W2E8, F1R1S6, A0A0R4IU95, B8JII5, Q802Z5, A0A0R4IEE5, F1QI96, F1Q8J0, A0A0R4IQE7, F1Q4P2, Q5TZC4, E7FD35, I3IS00, F1QLY2, F1Q618, A0A0R4IWF3, A0A0R4IA19, F6NN58, F1QBW6, X1WGP5, Q6JAA4, F1R609, Q8UVK2, B0S8G9, B8JLP0, F1R9W2, E7F8Q2, A0A0R4IW61, Q1LV47, F1RBQ7, A0A0R4ILC0, C4XVB5, F1QQB3,…	584	1375	15797	1.3574	0.996029	0.498971	10.9117
GOTERM_CC_DIRECT	GO:0031513~nonmotile primary cilium	3	0.337079	0.00816626	F1R764, B0S6T1, F1QNW2	577	4	15208	19.7678	0.857946	0.243303	10.0304
GOTERM_BP_DIRECT	GO:0043487~regulation of RNA stability	3	0.337079	0.00874527	A0A0R4IZ84, F1R7R1, A0A0R4IAU8	586	4	14912	19.0853	0.999925	0.54673	13.0779
GOTERM_BP_DIRECT	GO:0034968~histone lysine methylation	4	0.449438	0.0101376	A0A0R4IPA3, F1QJX1, Q503J8, F1QXL2	586	12	14912	8.48237	0.999984	0.57142	15.0057
UP_KEYWORDS	Mitosis	8	0.898876	0.0104032	A0A0R4IPT9, F1QCU5, Q5RII9, F1R983, B0V123, A1L2F3, A0A0R4IU07, E7F350	881	62	22487	3.29347	0.884015	0.264905	12.3406
UP_KEYWORDS	Cilium biogenesis/degradation	7	0.786517	0.0117761	F1R764, F1QFM8, F1QDF8, E7FCN8, F1R310, Q6GQN0, A2CEH0	881	49	22487	3.64634	0.912863	0.262902	13.8599
GOTERM_MF_DIRECT	GO:0003774~motor activity	8	0.898876	0.0124639	E7F263, F1R764, E7F3F0, Q9DGG8, X1WCS2, F1R1I5, B0S6F2, F8W3L6	584	68	15797	3.18231	0.999888	0.635908	17.3068
GOTERM_MF_DIRECT	GO:0070034~telomerase RNA binding	3	0.337079	0.0126248	F1QE52, A0A0R4IZ84, F1R7R1	584	5	15797	16.2298	0.9999	0.601928	17.5107
GOTERM_BP_DIRECT	GO:0050919~negative chemotaxis	5	0.561798	0.0133355	F1QNC4, E7FBE1, E9QD84, F1QGW9, F1QR50	586	24	14912	5.30148	1	0.645348	19.2829
GOTERM_MF_DIRECT	GO:0000166~nucleotide binding	80	8.98876	0.0134818	B0V360, F1QUB8, Q5RGB7, Q7ZTI0, F1Q8Z0, F1QLW8, A0A0R4IYB8, A5WVY0, Q9DGG8, X1WCS2, F1R345, F8W2E8, C5J7W8, Q802Z5, Q8JFR5, F1RAK1, B0V237, F1R5C7, Q6IQS9, F8W3K2, F1Q8J0, E7FD35, B0UXW2, F1R5S1, F1R3X9, F1Q618, F1RB74, F6NN58, A0A0R4IA19, Q5RII9, Q90ZY5, A0A140LH45, B8JLP0, F1QIK5, F1R9W2, A0A0R4IW61, E7F3F0, Q1LV47, A0A0R4ILC0, Q5U3W1, E7FFK0, E7F4J7, F1QXC3, Q6NX09, A0A0R4IRV1, F8W3L6, Q9PW80,…	584	1678	15797	1.28961	0.999947	0.591237	18.5889
GOTERM_BP_DIRECT	GO:0031290~retinal ganglion cell axon guidance	6	0.674157	0.0141014	A0A0R4II20, E9QD84, A0A0R4IDN1, F1QHY7, B0S6T1, F1QNW2	586	37	14912	4.12656	1	0.640655	20.2769
GOTERM_BP_DIRECT	GO:0050684~regulation of mRNA processing	3	0.337079	0.014198	Q8UVK2, F1QQL7, F1QJ31	586	5	14912	15.2683	1	0.619447	20.4015
GOTERM_BP_DIRECT	GO:0060285~cilium-dependent cell motility	3	0.337079	0.014198	F1QRC1, A0A0G2L8X4, F1RB29	586	5	14912	15.2683	1	0.619447	20.4015
UP_KEYWORDS	Laminin EGF-like domain	5	0.561798	0.0152984	A9C3S7, A0A0R4II20, F1QD37, F1QYU0, A0A0R4IDN1	881	25	22487	5.10488	0.95824	0.29733	17.6479
GOTERM_MF_DIRECT	GO:0003723~RNA binding	27	3.03371	0.0174428	F1R9W2, F1QEM2, A0A0R4IW61, E7F981, F1QUB8, Q1LY17, E7F350, F1Q8Z0, Q7ZTI0, F1QLW8, Q9PW80, P79741, F1RC56, F8W2E8, A0A0R4ING3, Q503Z6, Q6IQS9, Z4YHP6, E7F1H9, Q1LVK9, Q4KMD2, F1QXG2, X1WGP5, E7F6H3, F1QVW5, F1R7U4, Q5TYQ8, Q1JPY8	584	453	15797	1.61223	0.999997	0.654628	23.4032
GOTERM_BP_DIRECT	GO:0006298~mismatch repair	4	0.449438	0.0192132	B8A6F5, A0A0R4IAE0, E7F558, F1QQM4	586	15	14912	6.78589	1	0.708765	26.623
GOTERM_MF_DIRECT	GO:0004004~ATP-dependent RNA helicase activity	7	0.786517	0.0196449	F1R9W2, F1QLW8, F6NN58, A0A0R4IA19, E7F525, Q5RGB7, B8JLP0	584	58	15797	3.26461	0.999999	0.66928	25.9634
GOTERM_BP_DIRECT	GO:0014037~Schwann cell differentiation	3	0.337079	0.0207474	B0S5C8, Q90XD1, F1R5S1	586	6	14912	12.7235	1	0.716091	28.4332
GOTERM_BP_DIRECT	GO:0007004~telomere maintenance via telomerase	3	0.337079	0.0207474	F1QE52, A0A0R4IZ84, F1R7R1	586	6	14912	12.7235	1	0.716091	28.4332
GOTERM_BP_DIRECT	GO:0007096~regulation of exit from mitosis	3	0.337079	0.0207474	A0A0R4IXF1, Q1LYE0, F1QGN5	586	6	14912	12.7235	1	0.716091	28.4332
UP_KEYWORDS	Cell cycle	12	1.34831	0.0208002	A0A0R4IGM2, A0A0R4IPT9, F1QCU5, Q1LV44, Q6PHE8, Q5RII9, F1R983, B0V123, A1L2F3, A0A0R4IU07, E7F350, Q5SPR8	881	139	22487	2.20355	0.986833	0.351441	23.2589
GOTERM_MF_DIRECT	GO:0044212~transcription regulatory region DNA binding	8	0.898876	0.0218972	A1L224, A0A0R4IB37, E9QDD4, Q503J8, F1QTW3, F1R609, B8A606, E7FFJ6, C4XVB5	584	76	15797	2.84733	1	0.682273	28.4992
GOTERM_CC_DIRECT	GO:0005819~spindle	5	0.561798	0.0228145	A0A0R4IPT9, R4GEM8, Q5RII9, E9QFU9, A1L2F3	577	29	15208	4.54431	0.995884	0.496713	25.7323
GOTERM_MF_DIRECT	GO:0000981~RNA polymerase II transcription factor activity, sequence-specific DNA binding	14	1.57303	0.0250505	F1QDF8, Q4U3K9, Q5TYS1, F1R0K1, Q4JNX5, A0A0R4IKA2, E7FFJ6, Q1LV18, Q0II00, E9QDD4, Q6DGE6, F1QRF9, E7FA97, Q30JB6	584	191	15797	1.9827	1	0.706594	31.9132
GOTERM_BP_DIRECT	GO:0003007~heart morphogenesis	6	0.674157	0.0257337	F1Q6T9, A0A0R4IRI6, A0A0R4IFW4, F1QXL2, Z4YID0, Q30JB6	586	43	14912	3.55076	1	0.773107	34.0317
GOTERM_MF_DIRECT	GO:0030215~semaphorin receptor binding	5	0.561798	0.026225	F1QNC4, E7FBE1, E9QD84, F1QGW9, F1QR50	584	31	15797	4.36285	1	0.700062	33.1454
GOTERM_MF_DIRECT	GO:0045499~chemorepellent activity	5	0.561798	0.026225	F1QNC4, E7FBE1, E9QD84, F1QGW9, F1QR50	584	31	15797	4.36285	1	0.700062	33.1454
UP_KEYWORDS	FAD	7	0.786517	0.0273929	B0UXN0, F1R9Y7, A3KQR0, A4QNU9, A0A0R4I9Q1, E7F022, F1QJL3	881	59	22487	3.02832	0.996726	0.405569	29.5182
GOTERM_MF_DIRECT	GO:0004386~helicase activity	8	0.898876	0.0281003	F1R9W2, F1QLW8, F6NN58, A0A0R4IA19, F1R345, B7ZDD5, Q5RGB7, B8JLP0	584	80	15797	2.70497	1	0.703454	35.0697
GOTERM_BP_DIRECT	GO:0030030~cell projection organization	6	0.674157	0.0281284	F1R764, F1QFM8, F1QDF8, F1R310, Q6GQN0, A2CEH0	586	44	14912	3.47006	1	0.786075	36.572
GOTERM_BP_DIRECT	GO:0042663~regulation of endodermal cell fate specification	3	0.337079	0.0282992	Q9DGM8, A0A0R4IRI6, Q8AV71	586	7	14912	10.9059	1	0.771849	36.7497
GOTERM_BP_DIRECT	GO:0006351~transcription, DNA-templated	41	4.60674	0.0284337	Q90477, P59723, Q7ZVI2, F1QS04, Q6GMI3, E7FDI9, Q4JNX5, A0A0R4IKA2, F1QJ31, A0A0R4I9V4, B8A521, A1L224, Q68EL6, F1QXL2, Z4YID0, Q6P984, F1QVQ9, F1QDF8, Q4U3K9, A0A0R4ICZ3, F1QRR4, Q5TYS1, Q6TA36, Q5TZC4, A0A0R4IDE2, B3DG99, B3DHZ4, A1A5T6, A0A0R4IH55, A0A0R4IPA3, A3KQ57, A0A0R4IB37, Q5U3H2, A0A0J9YJ42, A0A0R4ILV6, F1QTW3, Q8UVZ0, Q8UVK2, Q1L8S9, Q1JPY8, B0V3D1, Q802D2	586	747	14912	1.39669	1	0.757651	36.8892
GOTERM_CC_DIRECT	GO:0005739~mitochondrion	29	3.25843	0.0350038	B8A4W5, A2BEV1, Q287T7, A3KQR0, A5WVY0, F8W381, E7F525, A0A0R4ING3, B8A5D8, F1QD40, A0A0R4IJF5, Q6DH29, F1RB14, E7F9N5, F1QSV0, F1R9X2, Q6IQS9, Q5TYQ3, Q1L8H2, Q5RH02, A4QNU9, A0A0R4IFK5, A5WW99, Q1LV19, A0A0R4IJY0, B8JM40, F1R310, A0A0H2UKX4, F1R7U4, F1QQL7	577	514	15208	1.48707	0.999792	0.610248	36.8273
UP_KEYWORDS	RNA-binding	14	1.57303	0.0352441	F1Q8Z0, F1R9W2, F1QEM2, F1QLW8, A0A0R4IW61, Q9PW80, F1R345, F1QXG2, Z4YHP6, F8W2E8, F1QUB8, Q1JPY8, Q5TYQ8, E7F350	881	189	22487	1.8907	0.999383	0.459868	36.358
GOTERM_BP_DIRECT	GO:0048843~negative regulation of axon extension involved in axon guidance	5	0.561798	0.0353247	F1QNC4, E7FBE1, E9QD84, F1QGW9, F1QR50	586	32	14912	3.97611	1	0.815535	43.6651
GOTERM_CC_DIRECT	GO:0005929~cilium	8	0.898876	0.0356149	F1R764, F1QRC1, F1QX08, F1QZA3, Q6GQN0, F1RB29, F1Q654, F1QNW2	577	82	15208	2.57142	0.999822	0.578147	37.3411
UP_KEYWORDS	Flavoprotein	7	0.786517	0.0362934	B0UXN0, F1R9Y7, A3KQR0, A4QNU9, A0A0R4I9Q1, E7F022, F1QJL3	881	63	22487	2.83604	0.999507	0.443343	37.2243
UP_KEYWORDS	Cell division	9	1.01124	0.0363654	A0A0R4IPT9, F1QCU5, Q6PHE8, Q5RII9, F1R983, B0V123, A1L2F3, A0A0R4IU07, E7F350	881	97	22487	2.36824	0.999515	0.420195	37.2834
GOTERM_BP_DIRECT	GO:0000184~nuclear-transcribed mRNA catabolic process, nonsense-mediated decay	4	0.449438	0.0364534	Q5TYW4, A0A0R4IZ84, F1R7R1, C5J7W8	586	19	14912	5.35728	1	0.812241	44.7077
UP_KEYWORDS	Magnesium	12	1.34831	0.0368144	A9JRU2, F1R5C7, Q6DG94, Q6NYW1, F1QMA1, F1QJQ5, E7FFK0, F1QQM4, A0A0R4IRV1, Q8JFR5, E7F350, B3IWJ8	881	152	22487	2.01508	0.999559	0.402575	37.6504
GOTERM_CC_DIRECT	GO:0016459~myosin complex	7	0.786517	0.0384511	E7F263, E7F3F0, Q9DGG8, X1WCS2, F1R1I5, B0S6F2, F8W3L6	577	66	15208	2.79544	0.999911	0.571883	39.6754
UP_KEYWORDS	Helicase	7	0.786517	0.0387762	F1R9W2, F1QLW8, F6NN58, A0A0R4IA19, F1R345, B7ZDD5, Q5RGB7	881	64	22487	2.79173	0.99971	0.399012	39.2311
GOTERM_MF_DIRECT	GO:0008017~microtubule binding	11	1.23596	0.0392224	A0A0R4IEV2, F1Q733, X1WGN9, A0A0R4IM96, Q5RII9, F1QK82, A0A140LH45, Q5TZ43, A1L2F3, F1RAK1, F1QVM8	584	143	15797	2.08074	1	0.800434	45.4605
GOTERM_MF_DIRECT	GO:0000977~RNA polymerase II regulatory region sequence-specific DNA binding	8	0.898876	0.0394758	X1WBC8, Q5RFV1, F1QVT3, Q0II00, Q6DGE6, F1QLZ5, F1QEY1, B8A5S8	584	86	15797	2.51625	1	0.784943	45.678
UP_KEYWORDS	Immunoglobulin domain	11	1.23596	0.0395186	F1QNC4, E7EZ01, E9QD84, B3DKP1, A0A0R4IFS9, F1QPU8, E9QEG4, F1QR50, Q58EG3, Q8JFR5, E7FGC6	881	135	22487	2.07977	0.999753	0.38651	39.8196
UP_KEYWORDS	Cytoplasm	49	5.50562	0.0408791	F1QFM8, B0S5C8, E7F3D4, Q6GQN0, F1Q9C7, Q1RM03, E7F350, F1R9Y7, F1R345, F1QDV8, Q6DGX3, A1L2F3, F1QNW2, F1R3P9, F1RB74, F1QEZ3, A2CF49, F1QRC1, F6NN58, Q5RII9, F1R310, E7FCN8, F1QQ57, Q6DC53, A0A0R4IW61, F1QCU5, R4GEM8, Q1LV44, P59723, E9QFU9, A0A0R4IRV1, A2CEH0, Q9PW80, F1QUR9, F8W2P6, A5WWI2, Q68EL6, F1QSV0, F1R764, Q6PHE8, A0A0G2L8X4, G1K2K5, F1RE13, Q1LV19, A0A0R4IPT9, A0A140LH62, F1QXG2, F1Q…	881	947	22487	1.32069	0.999816	0.379773	40.8844
UP_KEYWORDS	Transcription	37	4.1573	0.0435003	Q90477, P59723, Q7ZVI2, F1QS04, Q6GMI3, E7FDI9, Q4JNX5, A0A0R4IKA2, A0A0R4I9V4, A1L224, F1R345, Q68EL6, F1QXL2, Z4YID0, Q6P984, F1QVQ9, F1QDF8, Q4U3K9, F1QRR4, A0A0R4ICZ3, Q5TYS1, Q6TA36, Q5TZC4, A0A0R4IDE2, B3DG99, B3DHZ4, A0A0R4IH55, A0A0R4IPA3, A3KQ57, A0A0R4IB37, Q5U3H2, A0A0J9YJ42, A0A0R4ILV6, F1QTW3, Q8UVK2, Q1L8S9, Q1JPY8, B0V3D1	881	682	22487	1.38476	0.999895	0.382577	42.8873
GOTERM_MF_DIRECT	GO:0004518~nuclease activity	7	0.786517	0.0441722	A0A0R4IW61, F1QK90, Q6DG94, F1R983, E7F6N8, F1QQM4, E7F350	584	70	15797	2.70497	1	0.805571	49.566
GOTERM_MF_DIRECT	GO:0038191~neuropilin binding	4	0.449438	0.0457301	F1QNC4, E7FBE1, E9QD84, F1QGW9	584	22	15797	4.91812	1	0.801311	50.7972
GOTERM_MF_DIRECT	GO:0008026~ATP-dependent helicase activity	4	0.449438	0.0457301	Q1LYP4, F1R345, B7ZDD5, B8JLP0	584	22	15797	4.91812	1	0.801311	50.7972
GOTERM_MF_DIRECT	GO:0016773~phosphotransferase activity, alcohol group as acceptor	4	0.449438	0.0457301	F1RC65, F8W3I0, Q5U3W1, Q6NX09	584	22	15797	4.91812	1	0.801311	50.7972
GOTERM_BP_DIRECT	GO:0043966~histone H3 acetylation	3	0.337079	0.0460619	Q90477, B0S8H2, Q6P013	586	9	14912	8.48237	1	0.869848	52.8791
GOTERM_BP_DIRECT	GO:0000712~resolution of meiotic recombination intermediates	3	0.337079	0.0460619	F1QPU2, F1QK90, E7F6N8	586	9	14912	8.48237	1	0.869848	52.8791
GOTERM_BP_DIRECT	GO:0007169~transmembrane receptor protein tyrosine kinase signaling pathway	9	1.01124	0.0470732	B0V237, A0A0R4IYB8, F1R5C7, B3DKP1, F8W4H3, A0A0R4IFS9, B8A4I5, F1R5S1, Q8JFR5	586	102	14912	2.24533	1	0.865303	53.6699
GOTERM_BP_DIRECT	GO:0006396~RNA processing	7	0.786517	0.0471933	Q7ZTI0, F1RB48, F1RC56, E7F525, Q5XJQ5, E7F365, F1R7U4	586	67	14912	2.65865	1	0.855651	53.763
GOTERM_MF_DIRECT	GO:0030983~mismatched DNA binding	3	0.337079	0.0502778	B8A6F5, A0A0R4IAE0, E7F558	584	10	15797	8.1149	1	0.817314	54.2326
GOTERM_MF_DIRECT	GO:0042162~telomeric DNA binding	3	0.337079	0.0502778	F1QE52, A0A0R4IZ84, F1R7R1	584	10	15797	8.1149	1	0.817314	54.2326
GOTERM_BP_DIRECT	GO:0007283~spermatogenesis	5	0.561798	0.0512551	Q1LV44, B8A557, B8A6F5, F1QE52, E9QES8	586	36	14912	3.53432	1	0.868839	56.8099
UP_KEYWORDS	Motor protein	8	0.898876	0.0514202	F1R764, E7F3F0, Q9DGG8, X1WCS2, B0S6F2, F1QK82, F1RAK1, F8W3L6	881	86	22487	2.37436	0.999981	0.419422	48.5655
GOTERM_MF_DIRECT	GO:0016740~transferase activity	61	6.85393	0.0521732	F1QFM7, F1R9N4, B0V360, Q6P3J0, B8JIA4, A0A0G2L2R7, A8Y5S5, E7FDI9, A0A0R4I9V4, B8JMH0, A0A0R4IYB8, Q58EM4, C5J7W8, Q8JFR5, B0V237, F1R5C7, B0UXW2, F1R5S1, F1R3X9, A5WW99, F1RB74, A0A0R4IPA3, F1QJX1, Q90ZY5, A0A0R4ILV6, A0A0R4IZ84, F1R3Y5, Q6NX01, Q5U3W1, E7F4J7, Q6NX09, A0A0R4IRV1, F1QUR9, Q6NYW1, E9QCS7, F8W4H3, F8W2P6, F1QXL2, A5WWI2, Q5RIL6, F1QY85, A9C3Q7, B3IWJ8, E9QIB7, F1R9X2, B3DKP1, B8J…	584	1319	15797	1.25097	1	0.815304	55.5972
GOTERM_CC_DIRECT	GO:0000151~ubiquitin ligase complex	6	0.674157	0.0529435	E7F0K2, T1ECU8, F1QD86, E7F6E1, Q6PFV0, A0A0H2UKX4	577	54	15208	2.92856	0.999998	0.660018	50.4006
GOTERM_MF_DIRECT	GO:0005524~ATP binding	75	8.42697	0.0532622	Q1LYP4, B0V360, F1QQ79, A8Y5S5, Q5RGB7, F1QLW8, A0A0R4IYB8, A5WVY0, Q9DGG8, A0A0R4IR86, B8A6F5, X1WCS2, A0A0R4IV01, F1R345, A8DZG7, C5J7W8, Q8JFR5, F1QQC9, F1RAK1, B0V237, F1R5C7, F8W3K2, B8A4A1, E7F2L1, F1Q4P2, B0UXW2, F1R5S1, E7F558, A0A140LH83, F1R3X9, F1RB74, A0A0R4IA19, F6NN58, Q5RII9, Q90ZY5, A0A140LH45, B8JLP0, F1QIK5, E7F092, F1R3Y5, F1R9W2, E7F3F0, Q5U3W1, E7FFK0, E7F4J7, Q6NX09, A0A0R4I…	584	1668	15797	1.21626	1	0.808601	56.3639
GOTERM_BP_DIRECT	GO:0007049~cell cycle	12	1.34831	0.0543527	A0A0R4IGM2, A0A0R4IPT9, F1QCU5, Q1LV44, Q6PHE8, Q5RII9, F1R983, B0V123, A1L2F3, A0A0R4IU07, E7F350, Q5SPR8	586	162	14912	1.88497	1	0.875467	59.0058
GOTERM_CC_DIRECT	GO:0030496~midbody	4	0.449438	0.0545469	Q6PHE8, Q5RII9, Q6DGX3, Q502I3	577	23	15208	4.58383	0.999998	0.641884	51.4723
GOTERM_BP_DIRECT	GO:0010501~RNA secondary structure unwinding	5	0.561798	0.0557586	F1R9W2, F1QLW8, F6NN58, A0A0R4IA19, Q5RGB7	586	37	14912	3.4388	1	0.87348	59.9676
GOTERM_BP_DIRECT	GO:0006139~nucleobase-containing compound metabolic process	5	0.561798	0.0557586	F1QBW6, F1R345, B7ZDD5, Q8UVK2, A5WWI2	586	37	14912	3.4388	1	0.87348	59.9676
GOTERM_BP_DIRECT	GO:0070286~axonemal dynein complex assembly	3	0.337079	0.0561117	F1QRC1, A0A0G2L8X4, F1RB29	586	10	14912	7.63413	1	0.866507	60.2058
GOTERM_BP_DIRECT	GO:0033077~T cell differentiation in thymus	3	0.337079	0.0561117	B0V237, F1R5C7, B8A606	586	10	14912	7.63413	1	0.866507	60.2058
GOTERM_BP_DIRECT	GO:0051301~cell division	9	1.01124	0.0566887	A0A0R4IPT9, F1QCU5, Q6PHE8, Q5RII9, F1R983, B0V123, A1L2F3, A0A0R4IU07, E7F350	586	106	14912	2.1606	1	0.860744	60.5922
UP_KEYWORDS	Cell projection	10	1.1236	0.0569656	F1R764, F1QRC1, A0A140LH62, F1QZA3, E7FCN8, Q6GQN0, A0A0G2L8X4, F1RB29, F1Q654, F1QNW2	881	125	22487	2.04195	0.999994	0.437494	52.2268
GOTERM_BP_DIRECT	GO:0060271~cilium morphogenesis	10	1.1236	0.0622333	F8W5U4, F1QDF8, F1RBQ8, F1R310, F1QPC2, F1RB29, F1Q654, F1QNW2, A2CEH0, A0A0R4IFG5	586	127	14912	2.00371	1	0.878131	64.1301
UP_KEYWORDS	Tyrosine-protein kinase	8	0.898876	0.0657977	B0V237, A0A0R4IYB8, F1R5C7, B3DKP1, F8W4H3, A0A0R4IFS9, F1R5S1, Q8JFR5	881	91	22487	2.2439	0.999999	0.471288	57.5659
UP_KEYWORDS	Activator	11	1.23596	0.0681456	Q90477, A0A0R4IH55, A1L224, A0A0R4IB37, F1QDF8, A0A0J9YJ42, F1R345, F1QS04, E7FDI9, F1QXL2, Q68EL6, Q1JPY8	881	149	22487	1.88435	1	0.468547	58.8897
GOTERM_MF_DIRECT	GO:0003697~single-stranded DNA binding	5	0.561798	0.068206	Q5RHY1, F1QK90, B8A6F5, E7F558, F1QQC9	584	42	15797	3.2202	1	0.871093	65.7112
GOTERM_MF_DIRECT	GO:0008425~2-polyprenyl-6-methoxy-1,4-benzoquinone methyltransferase activity	4	0.449438	0.0693602	F1R9X2, Q58EM4, F1R7U4, A5WW99	584	26	15797	4.16149	1	0.865263	66.3491
GOTERM_MF_DIRECT	GO:0016972~thiol oxidase activity	2	0.224719	0.0724517	B0UXN0, A4QNU9	584	2	15797	27.0497	1	0.867283	68.0036
GOTERM_BP_DIRECT	GO:0032543~mitochondrial translation	4	0.449438	0.0729011	A5WVY0, Q6IQS9, Q1L8H2, A0A0R4ING3, A0A0R4IRT6	586	25	14912	4.07154	1	0.909884	70.1155
GOTERM_CC_DIRECT	GO:0031234~extrinsic component of cytoplasmic side of plasma membrane	5	0.561798	0.0735229	B0V237, A0A0R4IYB8, F1R5C7, F8W4H3, A3KNJ9	577	42	15208	3.13774	1	0.726983	62.6332
GOTERM_CC_DIRECT	GO:0044614~nuclear pore cytoplasmic filaments	2	0.224719	0.0743175	E7F981, B0S5C8	577	2	15208	26.357	1	0.706327	63.0442
GOTERM_CC_DIRECT	GO:0071008~U2-type post-mRNA release spliceosomal complex	2	0.224719	0.0743175	F1QQ02, E7FCK8	577	2	15208	26.357	1	0.706327	63.0442
GOTERM_CC_DIRECT	GO:0015629~actin cytoskeleton	6	0.674157	0.0763352	Q6DC73, F1QES8, F1QR96, F1RCC9, E7F7V3, E9QFY4	577	60	15208	2.6357	1	0.693079	64.0691
GOTERM_BP_DIRECT	GO:0070124~mitochondrial translational initiation	2	0.224719	0.0769238	A2BEV1, F1QD40	586	2	14912	25.4471	1	0.915601	72.1188
GOTERM_BP_DIRECT	GO:0010452~histone H3-K36 methylation	2	0.224719	0.0769238	B8JIA4, E7FDI9	586	2	14912	25.4471	1	0.915601	72.1188
GOTERM_BP_DIRECT	GO:0034454~microtubule anchoring at centrosome	2	0.224719	0.0769238	F8W5U4, F1QE08	586	2	14912	25.4471	1	0.915601	72.1188
GOTERM_BP_DIRECT	GO:0000390~spliceosomal complex disassembly	2	0.224719	0.0769238	F1QQ02, E7FCK8	586	2	14912	25.4471	1	0.915601	72.1188
UP_KEYWORDS	Biological rhythms	3	0.337079	0.0778699	A0A0R4IH55, Q68EL6, Q1JPY8	881	12	22487	6.3811	1	0.501346	63.9777
GOTERM_BP_DIRECT	GO:0048511~rhythmic process	3	0.337079	0.078182	A0A0R4IH55, Q68EL6, Q1JPY8	586	12	14912	6.36177	1	0.913229	72.719
GOTERM_BP_DIRECT	GO:0060287~epithelial cilium movement involved in determination of left/right asymmetry	3	0.337079	0.078182	A0A0G2L8X4, A2CEH0, A0A0R4IFG5	586	12	14912	6.36177	1	0.913229	72.719
GOTERM_MF_DIRECT	GO:0017137~Rab GTPase binding	7	0.786517	0.0785346	F1R5W8, E7F513, F1QNW4, F1QYJ2, E7FBH3, E7FE32, R4GE71	584	81	15797	2.33762	1	0.879701	71.0395
UP_KEYWORDS	ANK repeat	16	1.79775	0.0793288	X1WCZ6, Q1LXR6, F1R5A6, B0UZD1, E7FE71, E7FEM0, F1QCY5, A0A0R4I9V6, F1QJX1, Q0II00, E7F984, Q6DGX3, F1Q5W6, F1R254, A0A0R4J8R8, A0A0R4IXB1	881	256	22487	1.59528	1	0.493917	64.689
GOTERM_MF_DIRECT	GO:0016818~hydrolase activity, acting on acid anhydrides, in phosphorus-containing anhydrides	3	0.337079	0.0810663	Q1LYP4, F1R345, B7ZDD5	584	13	15797	6.24223	1	0.87919	72.2219
GOTERM_CC_DIRECT	GO:0005874~microtubule	9	1.01124	0.0855074	F1R764, A0A0R4IPT9, Q5RII9, F1QK82, F1QZA3, F1QNW4, B2ZZ14, A1L2F3, F1RAK1	577	120	15208	1.97678	1	0.713897	68.4065
UP_KEYWORDS	Transferase	66	7.41573	0.0868124	A0A0G2L3Z2, F1QFM7, F1R9N4, B0V360, Q6P3J0, B8JIA4, A0A0G2L2R7, A8Y5S5, E7FDI9, A0A0R4I9V4, B8JMH0, A0A0R4IYB8, Q58EM4, C5J7W8, Q8JFR5, B0V237, F1R5C7, B0UXW2, F1R5S1, F1R3X9, A5WW99, F1RB74, A0A0R4IPA3, F1QJX1, Q90ZY5, A0A0R4ILV6, T1ECU8, A0A0R4IZ84, F1R7W6, F1R3Y5, Q6NX01, Q5U3W1, E7F4J7, Q6NX09, A0A0R4IRV1, Q8AW58, F1QUR9, Q6NYW1, E9QCS7, F8W4H3, F8W2P6, A0A0A0MPU6, F1QXL2, A5WWI2, Q5RIL6, F1Q…	881	1398	22487	1.20501	1	0.513017	68.1383
UP_KEYWORDS	Transcription regulation	33	3.70787	0.0884713	Q90477, P59723, Q7ZVI2, F1QS04, Q6GMI3, E7FDI9, A0A0R4IKA2, A1L224, F1R345, Q68EL6, F1QXL2, Z4YID0, Q6P984, F1QDF8, F1QVQ9, Q4U3K9, F1QRR4, A0A0R4ICZ3, Q6TA36, Q5TZC4, A0A0R4IDE2, B3DG99, B3DHZ4, A0A0R4IH55, A0A0R4IPA3, A3KQ57, A0A0R4IB37, Q5U3H2, A0A0J9YJ42, F1QTW3, Q8UVK2, Q1L8S9, Q1JPY8, B0V3D1	881	636	22487	1.32438	1	0.506755	68.8597
GOTERM_MF_DIRECT	GO:0003682~chromatin binding	10	1.1236	0.0885441	A0A0R4IGM2, F1QVT3, Q503J8, Q0II00, F1QTW3, Q6DGE6, Q6JAA4, F1QEY1, F1QY85, B8A5S8	584	145	15797	1.86549	1	0.893599	75.4565
GOTERM_MF_DIRECT	GO:0008757~S-adenosylmethionine-dependent methyltransferase activity	4	0.449438	0.0900054	F1R9X2, Q58EM4, A0A0A0MPU6, A5WW99	584	29	15797	3.73099	1	0.889837	76.0459
GOTERM_BP_DIRECT	GO:0000281~mitotic cytokinesis	3	0.337079	0.0900697	A5PMM5, Q502I3, A1L2F3	586	13	14912	5.87241	1	0.936559	77.8225
GOTERM_BP_DIRECT	GO:0021984~adenohypophysis development	3	0.337079	0.0900697	F1QHY7, B0S6T1, F1QNW2	586	13	14912	5.87241	1	0.936559	77.8225
GOTERM_BP_DIRECT	GO:0090630~activation of GTPase activity	5	0.561798	0.0929092	F1R5W8, E7F513, E7FBH3, E7F520, E7FE32	586	44	14912	2.89172	1	0.937587	78.9014
GOTERM_BP_DIRECT	GO:0007368~determination of left/right symmetry	8	0.898876	0.094053	F1QDF8, A0A0N9E2K8, F1QX08, A0A0R4IRI6, A0A0G2L8X4, F1RB29, F1Q654, F1QNW2	586	99	14912	2.05633	1	0.935289	79.322
GOTERM_BP_DIRECT	GO:0006364~rRNA processing	6	0.674157	0.0954818	F1R9W2, A2CEY8, P79741, F1R7U4, E7F350, A0A0R4IAU8	586	62	14912	2.46262	1	0.933599	79.8362
GOTERM_MF_DIRECT	GO:0031624~ubiquitin conjugating enzyme binding	4	0.449438	0.0973941	E7F0K2, T1ECU8, F1QD86, A0A0H2UKX4	584	30	15797	3.60662	1	0.90188	78.8294

## Sheet: Dme-Cat1
Category	Term	Count	%	PValue	Genes	List Total	Pop Hits	Pop Total	Fold Enrichment	Bonferroni	Benjamini	FDR
UP_KEYWORDS	Coiled coil	237	26.6292	2.10138e-23	F1QS46, A0A0R4IED0, F1QUB9, Q5RJ79, F1QT45, E7FFM2, E7F0W1, Q9DGG8, E7F6G2, A2BDR7, F1QNW4, C5J7W8, F1QNW2, E7F186, A0A0R4IGM2, F1Q8F1, F1Q4X8, F1QPC4, A0A140LH83, B0UYE9, F1QQ50, F1QGK5, F1QGK3, F1QRC1, A0A0R4IM77, E9QC10, Q66ID3, F1QYU0, E7F513, Q5RGW0, F1QQ52, Q7ZVR1, A0A0R4IRV6, F1R6V5, E7F9W4, F1Q793, F1QGN5, F1RE30, E9QCS7, F1QK82, F1R7R1, X1WEJ1, E7F3M3, F1QRR4, F1QE08, F1R5A6, E7FF14, A2R…	881	3222	22487	1.87749	4.32884e-21	4.32884e-21	2.64661e-20
GOTERM_CC_DIRECT	GO:0005634~nucleus	170	19.1011	2.0663e-09	F1QEM2, F1QS46, Q1LYP4, Q7ZVI2, F1R1Z6, Q6PBM7, Q1LUQ0, A0A0R4IKA2, Q7ZTI0, F1QVT3, F1R345, P79741, F8W381, A0A140LG17, C5J7W8, F1QNW2, Q802Z5, F1R7K2, Q30JB6, A0A0R4IGM2, Q6P984, F1QDF8, Q503J8, E7FDD8, F6NI81, F1RCC6, F1R1C2, A0A0R4IDE2, F1Q618, A2CF49, F1QJX1, E9QC10, F1QBW6, Q6DGE6, Q8UVK2, F1RCC9, B0V3D1, F1QQ52, Q7ZVR1, A0A0R4IRV6, A0A0R4IW61, P59723, Q6GMI3, E7F4J7, B8A5S8, F1QGN5, E7F525,…	577	2933	15208	1.52768	4.91779e-07	4.91779e-07	2.66354e-06
UP_KEYWORDS	Methyltransferase	17	1.91011	1.17881e-05	F1R9X2, F1R9N4, B8JIA4, A0A0G2L2R7, E7FDI9, A5WW99, A0A0R4IPA3, F1QJX1, F1QUR9, Q5U3H2, Q58EM4, A0A0A0MPU6, F1QXL2, F1QY85, F1R7U4, A9C3Q7, A8WHR1	881	116	22487	3.74065	0.00242543	0.00121345	0.0148457
GOTERM_CC_DIRECT	GO:0005814~centriole	9	1.01124	1.47043e-05	F1R3P9, F1QCU5, Q1LV44, F1QE08, F1R310, Q6GQN0, F1QNW2, A2CEH0, F1RB74	577	31	15208	7.65204	0.00349354	0.0017483	0.0189528
GOTERM_MF_DIRECT	GO:0008168~methyltransferase activity	18	2.02247	4.27684e-05	F1R9X2, F1R9N4, B8JIA4, A0A0G2L2R7, E7FDI9, A5WW99, A0A0R4IPA3, F1QJX1, A0A0R4IJY0, F1QUR9, Q5U3H2, Q58EM4, A0A0A0MPU6, F1QXL2, F1QY85, F1R7U4, A9C3Q7, A8WHR1	584	151	15797	3.22446	0.030532	0.030532	0.0647808
GOTERM_MF_DIRECT	GO:0003677~DNA binding	80	8.98876	7.39764e-05	Q90477, F1QP75, Q1LYP4, F1R9N4, Q7ZVI2, F1QS04, Q6DC85, Q4JNX5, Q6P013, A0A0R4I9V4, F1QQ02, E9QDD4, B0R147, Q1LWL8, F1R345, A1L2F3, Q30JB6, F1QQC9, Q6P984, F1QDF8, Q5TYS1, F6NI81, A0A0R4IRI6, A0A0R4IQE7, Q5TZC4, A0A0R4IDE2, E7FFJ6, B3DHZ4, A0A0R4IPA3, F6NN58, F1QK90, Q0II00, A0A0R4ILV6, Q6DGE6, F1QTW3, F1R983, Q8UVK2, B0V3D1, F1QQ52, I3ISP1, Q9DGM8, Q6GMI3, E7F4J7, B8A5S8, F1QJ31, A1L224, E7FCK8,…	584	1393	15797	1.55346	0.0522219	0.026461	0.112026
UP_KEYWORDS	Cytoskeleton	23	2.58427	8.44585e-05	F1R3P9, F1R764, F1QFM8, F1QCU5, Q1LV44, Q6PHE8, R4GEM8, Q6GQN0, E9QFU9, A0A0G2L8X4, A2CEH0, Q1RM03, F1RB74, A0A0R4IPT9, F1QRC1, Q5RII9, A0A140LH62, F1R345, F1QZA3, F1R310, E7FCN8, A1L2F3, F1QNW2	881	226	22487	2.59762	0.0172487	0.00578294	0.10632
GOTERM_MF_DIRECT	GO:0018024~histone-lysine N-methyltransferase activity	8	0.898876	0.000109204	A0A0R4IPA3, F1QJX1, Q5U3H2, Q503J8, B8JIA4, E7FDI9, F1QXL2, F1QY85	584	31	15797	6.98056	0.0761239	0.0260472	0.165332
GOTERM_BP_DIRECT	GO:0032259~methylation	16	1.79775	0.000112577	F1R9X2, F1R9N4, B8JIA4, A0A0G2L2R7, E7FDI9, A5WW99, A0A0R4IPA3, F1QJX1, F1QUR9, Q5U3H2, Q58EM4, F1QXL2, F1QY85, F1R7U4, A9C3Q7, A8WHR1	586	125	14912	3.25723	0.114588	0.114588	0.179483
GOTERM_MF_DIRECT	GO:0003700~transcription factor activity, sequence-specific DNA binding	45	5.05618	0.000123666	A0A0R4IRV6, Q7ZVI2, F1QZP2, F1QS04, Q6DC85, Q6GMI3, F1R1Z6, Q4JNX5, C4XVB5, A1L224, E7FCK8, F1QVT3, Q1LWL8, A0A0R4IIR4, F1QEY1, B8A606, Q8AV71, F1QRF9, A0A140LG17, Q68EL6, Q30JB6, Q5RFV1, F1QVQ9, F1QDF8, B7SEE0, Q5TYS1, A0A0R4IRI6, A0A0R4IQE7, Q5TZC4, F1R0K1, B3DG99, F1Q573, A2RUX8, X1WBC8, E7EZ03, Q1LV18, A0A0R4IB37, Q0II00, Q6DGE6, F1R609, Q8UVZ0, Q8UVK2, E7FA97, F1QLZ5, F1QPF2, F1QQ52	584	663	15797	1.83595	0.0857613	0.0221665	0.187208
GOTERM_BP_DIRECT	GO:0042384~cilium assembly	15	1.68539	0.000134058	F8W5U4, F1R764, F1QFM8, F1QDF8, F1RBQ8, F1QX08, F1QZA3, F1R310, E7FCN8, Q6GQN0, F1Q654, F1QIK5, A2CEH0, F1QNW2, A0A0R4IFG5	586	113	14912	3.37793	0.134914	0.0698999	0.213695
UP_KEYWORDS	S-adenosyl-L-methionine	14	1.57303	0.00017303	F1R9X2, F1R9N4, B8JIA4, E7FDI9, A5WW99, A0A0R4IPA3, F1QUR9, Q5U3H2, Q58EM4, A0A0A0MPU6, F1QXL2, F1RB14, F1QY85, F1R7U4	881	102	22487	3.50335	0.0350194	0.00887224	0.217706
GOTERM_CC_DIRECT	GO:0005930~axoneme	7	0.786517	0.000215927	E7F630, F1R764, F1QRC1, F1QZA3, A0A0G2L8X4, F1Q654, A0A0R4IFG5	577	24	15208	7.68746	0.0500977	0.0169861	0.277981
GOTERM_BP_DIRECT	GO:0045944~positive regulation of transcription from RNA polymerase II promoter	18	2.02247	0.00023018	E7F3Z5, Q90477, Q4U3K9, F1QS04, F1QXB5, A0A0R4IKI2, E7FDI9, B8A5S8, C4XVB5, X1WBC8, A1L224, B8A521, A0A0R4IB37, E7F958, F1QYY6, Q0II00, Q6DGE6, B8A606, Q802D2	586	163	14912	2.81011	0.220305	0.0796038	0.366655
GOTERM_CC_DIRECT	GO:0005856~cytoskeleton	26	2.92135	0.000309341	F1QCU5, F1QFM8, Q1LV44, E9QFU9, Q6GQN0, Q1RM03, A2CEH0, F1Q733, F1Q6T9, Q9DGG8, F8W4H3, F1QNW2, A1L2F3, F1R764, B0V237, Q6PHE8, F1R5C7, F1Q4X8, F1RB74, A0A0R4IPT9, F1QRC1, Q5RII9, A0A140LH62, F1QZA3, A0A0R4IG34, F1R310	577	309	15208	2.21774	0.0709888	0.0182402	0.39802
GOTERM_CC_DIRECT	GO:0005730~nucleolus	15	1.68539	0.000806588	F1R9W2, A0A0R4IXF1, A2CEY8, E7F0U9, F1RB74, A0A0R4IH55, Q1LVK9, P79741, F1QGN5, F1QRH4, B8JLP0, A1L2F3, Q1JPY8, Q7ZVR1, Q503Z6	577	139	15208	2.84428	0.174731	0.0376808	1.03475
GOTERM_BP_DIRECT	GO:0035082~axoneme assembly	5	0.561798	0.00090211	E7F630, F1QZA3, Q6GQN0, F1Q654, F1QNW2	586	12	14912	10.603	0.623042	0.216438	1.42978
GOTERM_CC_DIRECT	GO:0005813~centrosome	12	1.34831	0.000998505	F8W5U4, E7F0K2, F1QCU5, Q1LV44, Q5RII9, E7FDD8, F1QE08, F1QW15, F1R310, E9QFU9, Q5TZ43, F1QVM8	577	96	15208	3.29463	0.21161	0.0388523	1.2795
GOTERM_BP_DIRECT	GO:0007099~centriole replication	4	0.449438	0.00186775	F1R3P9, F1QCU5, Q1LV44, F1RB74	586	7	14912	14.5412	0.867468	0.33248	2.93902
GOTERM_MF_DIRECT	GO:0043021~ribonucleoprotein complex binding	4	0.449438	0.00243723	P79741, A0A0R4IZ84, F1R7R1, F1R3N8	584	8	15797	13.5248	0.829521	0.298005	3.62974
GOTERM_MF_DIRECT	GO:0016971~flavin-linked sulfhydryl oxidase activity	3	0.337079	0.00397931	B0UXN0, A4QNU9, F1QJL3	584	3	15797	27.0497	0.944466	0.382325	5.8624
GOTERM_BP_DIRECT	GO:0007067~mitotic nuclear division	10	1.1236	0.0043695	A0A0R4IPT9, F1QCU5, A5PMM5, Q5RII9, F1R983, B0V123, Q5RIL6, A1L2F3, A0A0R4IU07, E7F350	586	81	14912	3.14162	0.991207	0.545684	6.74894
GOTERM_BP_DIRECT	GO:0006355~regulation of transcription, DNA-templated	71	7.97753	0.00477518	Q90477, E9QGK5, Q1LYP4, Q7ZVI2, F1QS04, Q6DC85, F1R1Z6, E7FDI9, Q4JNX5, A0A0R4IKA2, F1QQ02, F1QVT3, A0A0R4IR86, Q1LWL8, A0A140LG17, Q802Z5, Q30JB6, Q6P984, F1QDF8, B0S8H2, B7SEE0, Q5TYS1, Q1L8H2, F6NI81, Q5TZC4, A0A0R4IDE2, E7FFJ6, B3DHZ4, A0A0R4IPA3, Q0II00, Q6DGE6, F1QTW3, F1R609, Q8UVK2, B0V3D1, B8A4W5, P59723, F1QZP2, Q6GMI3, F1QQB3, A1L224, E7FCK8, A0A0R4IIR4, F1QEY1, F1QRF9, Q68EL6, F1QXL2,…	586	1310	14912	1.37919	0.99434	0.5225	7.35339
GOTERM_BP_DIRECT	GO:0061053~somite development	6	0.674157	0.0049644	F1QEZ3, A0A0R4II20, F8W381, B0S5Q0, A0A0R4IDN1, Q802Z5	586	29	14912	5.26492	0.995392	0.489562	7.63406
GOTERM_BP_DIRECT	GO:0007634~optokinetic behavior	4	0.449438	0.00586284	A0A0R4II20, P59015, A0A0R4IDN1, A2CEH0	586	10	14912	10.1788	0.998264	0.506516	8.95587
UP_KEYWORDS	Nucleus	89	10	0.00643312	Q90477, F1QEM2, Q1LYP4, F1R9N4, F1QS04, Q6DC85, B8JIA4, B0S5C8, E7FDI9, Q4JNX5, Q1LUQ0, A0A0R4IKA2, A0A0R4IU07, F1QQ02, A0A0R4IR86, P79741, F1R345, Q1LWL8, Q6DGX3, F1QNW2, A1L2F3, Q30JB6, A0A0R4IGM2, Q6P984, F1QDF8, Q5TYS1, F6NI81, Q5TZC4, A0A0R4IDE2, B3DHZ4, F1QEZ3, A0A0R4IPA3, F1QJX1, E9QC10, F6NN58, Q1LVK9, Q6DGE6, F1R983, F1QTW3, Q8UVK2, B0V3D1, F1QQ52, Q7ZVR1, F1R9W2, A0A0R4IW61, R4GEM8, P59…	881	1726	22487	1.31615	0.735391	0.233485	7.80685
GOTERM_BP_DIRECT	GO:0006281~DNA repair	15	1.68539	0.00644487	F1QPU2, R4GEM8, E7F4J7, A0A0R4IU07, E7F0W1, F1QK90, F1R983, B3DJT4, E7F6Y7, E7F6N8, A0A0R4IAE0, C5J7W8, F1QQM4, U3JAR8, F1QQC9	586	168	14912	2.27206	0.999078	0.50289	9.80268
GOTERM_MF_DIRECT	GO:0003690~double-stranded DNA binding	6	0.674157	0.00678584	E9QC10, Q503J8, Q1L8H2, A0A0R4IAE0, F1QQB3, F1QQC9	584	33	15797	4.91812	0.99282	0.505997	9.80225
GOTERM_BP_DIRECT	GO:0001755~neural crest cell migration	10	1.1236	0.00699048	F1QNC4, F1QQ50, E7FBE1, F1QRR4, E9QD84, F1QGW9, Q90XD1, F1R5S1, F1QR50, A1L2F3	586	87	14912	2.92495	0.999491	0.498116	10.5898
UP_KEYWORDS	Cilium	8	0.898876	0.0072703	F1R764, F1QRC1, F1QZA3, Q6GQN0, A0A0G2L8X4, F1RB29, F1Q654, F1QNW2	881	58	22487	3.52061	0.777572	0.221608	8.78047
GOTERM_MF_DIRECT	GO:0003676~nucleic acid binding	69	7.75281	0.00759683	Q1LUU8, Q1LYP4, E7F2K0, F1QUB8, Q5RGB7, A0A0R4IKA2, Q7ZTI0, F1QQ02, F1Q8Z0, F1QLW8, Q6DG94, F1R345, F1RE12, F8W2E8, F1R1S6, A0A0R4IU95, B8JII5, Q802Z5, A0A0R4IEE5, F1QI96, F1Q8J0, A0A0R4IQE7, F1Q4P2, Q5TZC4, E7FD35, I3IS00, F1QLY2, F1Q618, A0A0R4IWF3, A0A0R4IA19, F6NN58, F1QBW6, X1WGP5, Q6JAA4, F1R609, Q8UVK2, B0S8G9, B8JLP0, F1R9W2, E7F8Q2, A0A0R4IW61, Q1LV47, F1RBQ7, A0A0R4ILC0, C4XVB5, F1QQB3,…	584	1375	15797	1.3574	0.996029	0.498971	10.9117
GOTERM_CC_DIRECT	GO:0031513~nonmotile primary cilium	3	0.337079	0.00816626	F1R764, B0S6T1, F1QNW2	577	4	15208	19.7678	0.857946	0.243303	10.0304
GOTERM_BP_DIRECT	GO:0043487~regulation of RNA stability	3	0.337079	0.00874527	A0A0R4IZ84, F1R7R1, A0A0R4IAU8	586	4	14912	19.0853	0.999925	0.54673	13.0779
GOTERM_BP_DIRECT	GO:0034968~histone lysine methylation	4	0.449438	0.0101376	A0A0R4IPA3, F1QJX1, Q503J8, F1QXL2	586	12	14912	8.48237	0.999984	0.57142	15.0057
UP_KEYWORDS	Mitosis	8	0.898876	0.0104032	A0A0R4IPT9, F1QCU5, Q5RII9, F1R983, B0V123, A1L2F3, A0A0R4IU07, E7F350	881	62	22487	3.29347	0.884015	0.264905	12.3406
UP_KEYWORDS	Cilium biogenesis/degradation	7	0.786517	0.0117761	F1R764, F1QFM8, F1QDF8, E7FCN8, F1R310, Q6GQN0, A2CEH0	881	49	22487	3.64634	0.912863	0.262902	13.8599
GOTERM_MF_DIRECT	GO:0003774~motor activity	8	0.898876	0.0124639	E7F263, F1R764, E7F3F0, Q9DGG8, X1WCS2, F1R1I5, B0S6F2, F8W3L6	584	68	15797	3.18231	0.999888	0.635908	17.3068
GOTERM_MF_DIRECT	GO:0070034~telomerase RNA binding	3	0.337079	0.0126248	F1QE52, A0A0R4IZ84, F1R7R1	584	5	15797	16.2298	0.9999	0.601928	17.5107
GOTERM_BP_DIRECT	GO:0050919~negative chemotaxis	5	0.561798	0.0133355	F1QNC4, E7FBE1, E9QD84, F1QGW9, F1QR50	586	24	14912	5.30148	1	0.645348	19.2829
GOTERM_MF_DIRECT	GO:0000166~nucleotide binding	80	8.98876	0.0134818	B0V360, F1QUB8, Q5RGB7, Q7ZTI0, F1Q8Z0, F1QLW8, A0A0R4IYB8, A5WVY0, Q9DGG8, X1WCS2, F1R345, F8W2E8, C5J7W8, Q802Z5, Q8JFR5, F1RAK1, B0V237, F1R5C7, Q6IQS9, F8W3K2, F1Q8J0, E7FD35, B0UXW2, F1R5S1, F1R3X9, F1Q618, F1RB74, F6NN58, A0A0R4IA19, Q5RII9, Q90ZY5, A0A140LH45, B8JLP0, F1QIK5, F1R9W2, A0A0R4IW61, E7F3F0, Q1LV47, A0A0R4ILC0, Q5U3W1, E7FFK0, E7F4J7, F1QXC3, Q6NX09, A0A0R4IRV1, F8W3L6, Q9PW80,…	584	1678	15797	1.28961	0.999947	0.591237	18.5889
GOTERM_BP_DIRECT	GO:0031290~retinal ganglion cell axon guidance	6	0.674157	0.0141014	A0A0R4II20, E9QD84, A0A0R4IDN1, F1QHY7, B0S6T1, F1QNW2	586	37	14912	4.12656	1	0.640655	20.2769
GOTERM_BP_DIRECT	GO:0050684~regulation of mRNA processing	3	0.337079	0.014198	Q8UVK2, F1QQL7, F1QJ31	586	5	14912	15.2683	1	0.619447	20.4015
GOTERM_BP_DIRECT	GO:0060285~cilium-dependent cell motility	3	0.337079	0.014198	F1QRC1, A0A0G2L8X4, F1RB29	586	5	14912	15.2683	1	0.619447	20.4015
UP_KEYWORDS	Laminin EGF-like domain	5	0.561798	0.0152984	A9C3S7, A0A0R4II20, F1QD37, F1QYU0, A0A0R4IDN1	881	25	22487	5.10488	0.95824	0.29733	17.6479
GOTERM_MF_DIRECT	GO:0003723~RNA binding	27	3.03371	0.0174428	F1R9W2, F1QEM2, A0A0R4IW61, E7F981, F1QUB8, Q1LY17, E7F350, F1Q8Z0, Q7ZTI0, F1QLW8, Q9PW80, P79741, F1RC56, F8W2E8, A0A0R4ING3, Q503Z6, Q6IQS9, Z4YHP6, E7F1H9, Q1LVK9, Q4KMD2, F1QXG2, X1WGP5, E7F6H3, F1QVW5, F1R7U4, Q5TYQ8, Q1JPY8	584	453	15797	1.61223	0.999997	0.654628	23.4032
GOTERM_BP_DIRECT	GO:0006298~mismatch repair	4	0.449438	0.0192132	B8A6F5, A0A0R4IAE0, E7F558, F1QQM4	586	15	14912	6.78589	1	0.708765	26.623
GOTERM_MF_DIRECT	GO:0004004~ATP-dependent RNA helicase activity	7	0.786517	0.0196449	F1R9W2, F1QLW8, F6NN58, A0A0R4IA19, E7F525, Q5RGB7, B8JLP0	584	58	15797	3.26461	0.999999	0.66928	25.9634
GOTERM_BP_DIRECT	GO:0014037~Schwann cell differentiation	3	0.337079	0.0207474	B0S5C8, Q90XD1, F1R5S1	586	6	14912	12.7235	1	0.716091	28.4332
GOTERM_BP_DIRECT	GO:0007004~telomere maintenance via telomerase	3	0.337079	0.0207474	F1QE52, A0A0R4IZ84, F1R7R1	586	6	14912	12.7235	1	0.716091	28.4332
GOTERM_BP_DIRECT	GO:0007096~regulation of exit from mitosis	3	0.337079	0.0207474	A0A0R4IXF1, Q1LYE0, F1QGN5	586	6	14912	12.7235	1	0.716091	28.4332
UP_KEYWORDS	Cell cycle	12	1.34831	0.0208002	A0A0R4IGM2, A0A0R4IPT9, F1QCU5, Q1LV44, Q6PHE8, Q5RII9, F1R983, B0V123, A1L2F3, A0A0R4IU07, E7F350, Q5SPR8	881	139	22487	2.20355	0.986833	0.351441	23.2589
GOTERM_MF_DIRECT	GO:0044212~transcription regulatory region DNA binding	8	0.898876	0.0218972	A1L224, A0A0R4IB37, E9QDD4, Q503J8, F1QTW3, F1R609, B8A606, E7FFJ6, C4XVB5	584	76	15797	2.84733	1	0.682273	28.4992
GOTERM_CC_DIRECT	GO:0005819~spindle	5	0.561798	0.0228145	A0A0R4IPT9, R4GEM8, Q5RII9, E9QFU9, A1L2F3	577	29	15208	4.54431	0.995884	0.496713	25.7323
GOTERM_MF_DIRECT	GO:0000981~RNA polymerase II transcription factor activity, sequence-specific DNA binding	14	1.57303	0.0250505	F1QDF8, Q4U3K9, Q5TYS1, F1R0K1, Q4JNX5, A0A0R4IKA2, E7FFJ6, Q1LV18, Q0II00, E9QDD4, Q6DGE6, F1QRF9, E7FA97, Q30JB6	584	191	15797	1.9827	1	0.706594	31.9132
GOTERM_BP_DIRECT	GO:0003007~heart morphogenesis	6	0.674157	0.0257337	F1Q6T9, A0A0R4IRI6, A0A0R4IFW4, F1QXL2, Z4YID0, Q30JB6	586	43	14912	3.55076	1	0.773107	34.0317
GOTERM_MF_DIRECT	GO:0030215~semaphorin receptor binding	5	0.561798	0.026225	F1QNC4, E7FBE1, E9QD84, F1QGW9, F1QR50	584	31	15797	4.36285	1	0.700062	33.1454
GOTERM_MF_DIRECT	GO:0045499~chemorepellent activity	5	0.561798	0.026225	F1QNC4, E7FBE1, E9QD84, F1QGW9, F1QR50	584	31	15797	4.36285	1	0.700062	33.1454
UP_KEYWORDS	FAD	7	0.786517	0.0273929	B0UXN0, F1R9Y7, A3KQR0, A4QNU9, A0A0R4I9Q1, E7F022, F1QJL3	881	59	22487	3.02832	0.996726	0.405569	29.5182
GOTERM_MF_DIRECT	GO:0004386~helicase activity	8	0.898876	0.0281003	F1R9W2, F1QLW8, F6NN58, A0A0R4IA19, F1R345, B7ZDD5, Q5RGB7, B8JLP0	584	80	15797	2.70497	1	0.703454	35.0697
GOTERM_BP_DIRECT	GO:0030030~cell projection organization	6	0.674157	0.0281284	F1R764, F1QFM8, F1QDF8, F1R310, Q6GQN0, A2CEH0	586	44	14912	3.47006	1	0.786075	36.572
GOTERM_BP_DIRECT	GO:0042663~regulation of endodermal cell fate specification	3	0.337079	0.0282992	Q9DGM8, A0A0R4IRI6, Q8AV71	586	7	14912	10.9059	1	0.771849	36.7497
GOTERM_BP_DIRECT	GO:0006351~transcription, DNA-templated	41	4.60674	0.0284337	Q90477, P59723, Q7ZVI2, F1QS04, Q6GMI3, E7FDI9, Q4JNX5, A0A0R4IKA2, F1QJ31, A0A0R4I9V4, B8A521, A1L224, Q68EL6, F1QXL2, Z4YID0, Q6P984, F1QVQ9, F1QDF8, Q4U3K9, A0A0R4ICZ3, F1QRR4, Q5TYS1, Q6TA36, Q5TZC4, A0A0R4IDE2, B3DG99, B3DHZ4, A1A5T6, A0A0R4IH55, A0A0R4IPA3, A3KQ57, A0A0R4IB37, Q5U3H2, A0A0J9YJ42, A0A0R4ILV6, F1QTW3, Q8UVZ0, Q8UVK2, Q1L8S9, Q1JPY8, B0V3D1, Q802D2	586	747	14912	1.39669	1	0.757651	36.8892
GOTERM_CC_DIRECT	GO:0005739~mitochondrion	29	3.25843	0.0350038	B8A4W5, A2BEV1, Q287T7, A3KQR0, A5WVY0, F8W381, E7F525, A0A0R4ING3, B8A5D8, F1QD40, A0A0R4IJF5, Q6DH29, F1RB14, E7F9N5, F1QSV0, F1R9X2, Q6IQS9, Q5TYQ3, Q1L8H2, Q5RH02, A4QNU9, A0A0R4IFK5, A5WW99, Q1LV19, A0A0R4IJY0, B8JM40, F1R310, A0A0H2UKX4, F1R7U4, F1QQL7	577	514	15208	1.48707	0.999792	0.610248	36.8273
UP_KEYWORDS	RNA-binding	14	1.57303	0.0352441	F1Q8Z0, F1R9W2, F1QEM2, F1QLW8, A0A0R4IW61, Q9PW80, F1R345, F1QXG2, Z4YHP6, F8W2E8, F1QUB8, Q1JPY8, Q5TYQ8, E7F350	881	189	22487	1.8907	0.999383	0.459868	36.358
GOTERM_BP_DIRECT	GO:0048843~negative regulation of axon extension involved in axon guidance	5	0.561798	0.0353247	F1QNC4, E7FBE1, E9QD84, F1QGW9, F1QR50	586	32	14912	3.97611	1	0.815535	43.6651
GOTERM_CC_DIRECT	GO:0005929~cilium	8	0.898876	0.0356149	F1R764, F1QRC1, F1QX08, F1QZA3, Q6GQN0, F1RB29, F1Q654, F1QNW2	577	82	15208	2.57142	0.999822	0.578147	37.3411
UP_KEYWORDS	Flavoprotein	7	0.786517	0.0362934	B0UXN0, F1R9Y7, A3KQR0, A4QNU9, A0A0R4I9Q1, E7F022, F1QJL3	881	63	22487	2.83604	0.999507	0.443343	37.2243
UP_KEYWORDS	Cell division	9	1.01124	0.0363654	A0A0R4IPT9, F1QCU5, Q6PHE8, Q5RII9, F1R983, B0V123, A1L2F3, A0A0R4IU07, E7F350	881	97	22487	2.36824	0.999515	0.420195	37.2834
GOTERM_BP_DIRECT	GO:0000184~nuclear-transcribed mRNA catabolic process, nonsense-mediated decay	4	0.449438	0.0364534	Q5TYW4, A0A0R4IZ84, F1R7R1, C5J7W8	586	19	14912	5.35728	1	0.812241	44.7077
UP_KEYWORDS	Magnesium	12	1.34831	0.0368144	A9JRU2, F1R5C7, Q6DG94, Q6NYW1, F1QMA1, F1QJQ5, E7FFK0, F1QQM4, A0A0R4IRV1, Q8JFR5, E7F350, B3IWJ8	881	152	22487	2.01508	0.999559	0.402575	37.6504
GOTERM_CC_DIRECT	GO:0016459~myosin complex	7	0.786517	0.0384511	E7F263, E7F3F0, Q9DGG8, X1WCS2, F1R1I5, B0S6F2, F8W3L6	577	66	15208	2.79544	0.999911	0.571883	39.6754
UP_KEYWORDS	Helicase	7	0.786517	0.0387762	F1R9W2, F1QLW8, F6NN58, A0A0R4IA19, F1R345, B7ZDD5, Q5RGB7	881	64	22487	2.79173	0.99971	0.399012	39.2311
GOTERM_MF_DIRECT	GO:0008017~microtubule binding	11	1.23596	0.0392224	A0A0R4IEV2, F1Q733, X1WGN9, A0A0R4IM96, Q5RII9, F1QK82, A0A140LH45, Q5TZ43, A1L2F3, F1RAK1, F1QVM8	584	143	15797	2.08074	1	0.800434	45.4605
GOTERM_MF_DIRECT	GO:0000977~RNA polymerase II regulatory region sequence-specific DNA binding	8	0.898876	0.0394758	X1WBC8, Q5RFV1, F1QVT3, Q0II00, Q6DGE6, F1QLZ5, F1QEY1, B8A5S8	584	86	15797	2.51625	1	0.784943	45.678
UP_KEYWORDS	Immunoglobulin domain	11	1.23596	0.0395186	F1QNC4, E7EZ01, E9QD84, B3DKP1, A0A0R4IFS9, F1QPU8, E9QEG4, F1QR50, Q58EG3, Q8JFR5, E7FGC6	881	135	22487	2.07977	0.999753	0.38651	39.8196
UP_KEYWORDS	Cytoplasm	49	5.50562	0.0408791	F1QFM8, B0S5C8, E7F3D4, Q6GQN0, F1Q9C7, Q1RM03, E7F350, F1R9Y7, F1R345, F1QDV8, Q6DGX3, A1L2F3, F1QNW2, F1R3P9, F1RB74, F1QEZ3, A2CF49, F1QRC1, F6NN58, Q5RII9, F1R310, E7FCN8, F1QQ57, Q6DC53, A0A0R4IW61, F1QCU5, R4GEM8, Q1LV44, P59723, E9QFU9, A0A0R4IRV1, A2CEH0, Q9PW80, F1QUR9, F8W2P6, A5WWI2, Q68EL6, F1QSV0, F1R764, Q6PHE8, A0A0G2L8X4, G1K2K5, F1RE13, Q1LV19, A0A0R4IPT9, A0A140LH62, F1QXG2, F1Q…	881	947	22487	1.32069	0.999816	0.379773	40.8844
UP_KEYWORDS	Transcription	37	4.1573	0.0435003	Q90477, P59723, Q7ZVI2, F1QS04, Q6GMI3, E7FDI9, Q4JNX5, A0A0R4IKA2, A0A0R4I9V4, A1L224, F1R345, Q68EL6, F1QXL2, Z4YID0, Q6P984, F1QVQ9, F1QDF8, Q4U3K9, F1QRR4, A0A0R4ICZ3, Q5TYS1, Q6TA36, Q5TZC4, A0A0R4IDE2, B3DG99, B3DHZ4, A0A0R4IH55, A0A0R4IPA3, A3KQ57, A0A0R4IB37, Q5U3H2, A0A0J9YJ42, A0A0R4ILV6, F1QTW3, Q8UVK2, Q1L8S9, Q1JPY8, B0V3D1	881	682	22487	1.38476	0.999895	0.382577	42.8873
GOTERM_MF_DIRECT	GO:0004518~nuclease activity	7	0.786517	0.0441722	A0A0R4IW61, F1QK90, Q6DG94, F1R983, E7F6N8, F1QQM4, E7F350	584	70	15797	2.70497	1	0.805571	49.566
GOTERM_MF_DIRECT	GO:0038191~neuropilin binding	4	0.449438	0.0457301	F1QNC4, E7FBE1, E9QD84, F1QGW9	584	22	15797	4.91812	1	0.801311	50.7972
GOTERM_MF_DIRECT	GO:0008026~ATP-dependent helicase activity	4	0.449438	0.0457301	Q1LYP4, F1R345, B7ZDD5, B8JLP0	584	22	15797	4.91812	1	0.801311	50.7972
GOTERM_MF_DIRECT	GO:0016773~phosphotransferase activity, alcohol group as acceptor	4	0.449438	0.0457301	F1RC65, F8W3I0, Q5U3W1, Q6NX09	584	22	15797	4.91812	1	0.801311	50.7972
GOTERM_BP_DIRECT	GO:0043966~histone H3 acetylation	3	0.337079	0.0460619	Q90477, B0S8H2, Q6P013	586	9	14912	8.48237	1	0.869848	52.8791
GOTERM_BP_DIRECT	GO:0000712~resolution of meiotic recombination intermediates	3	0.337079	0.0460619	F1QPU2, F1QK90, E7F6N8	586	9	14912	8.48237	1	0.869848	52.8791
GOTERM_BP_DIRECT	GO:0007169~transmembrane receptor protein tyrosine kinase signaling pathway	9	1.01124	0.0470732	B0V237, A0A0R4IYB8, F1R5C7, B3DKP1, F8W4H3, A0A0R4IFS9, B8A4I5, F1R5S1, Q8JFR5	586	102	14912	2.24533	1	0.865303	53.6699
GOTERM_BP_DIRECT	GO:0006396~RNA processing	7	0.786517	0.0471933	Q7ZTI0, F1RB48, F1RC56, E7F525, Q5XJQ5, E7F365, F1R7U4	586	67	14912	2.65865	1	0.855651	53.763
GOTERM_MF_DIRECT	GO:0030983~mismatched DNA binding	3	0.337079	0.0502778	B8A6F5, A0A0R4IAE0, E7F558	584	10	15797	8.1149	1	0.817314	54.2326
GOTERM_MF_DIRECT	GO:0042162~telomeric DNA binding	3	0.337079	0.0502778	F1QE52, A0A0R4IZ84, F1R7R1	584	10	15797	8.1149	1	0.817314	54.2326
GOTERM_BP_DIRECT	GO:0007283~spermatogenesis	5	0.561798	0.0512551	Q1LV44, B8A557, B8A6F5, F1QE52, E9QES8	586	36	14912	3.53432	1	0.868839	56.8099
UP_KEYWORDS	Motor protein	8	0.898876	0.0514202	F1R764, E7F3F0, Q9DGG8, X1WCS2, B0S6F2, F1QK82, F1RAK1, F8W3L6	881	86	22487	2.37436	0.999981	0.419422	48.5655
GOTERM_MF_DIRECT	GO:0016740~transferase activity	61	6.85393	0.0521732	F1QFM7, F1R9N4, B0V360, Q6P3J0, B8JIA4, A0A0G2L2R7, A8Y5S5, E7FDI9, A0A0R4I9V4, B8JMH0, A0A0R4IYB8, Q58EM4, C5J7W8, Q8JFR5, B0V237, F1R5C7, B0UXW2, F1R5S1, F1R3X9, A5WW99, F1RB74, A0A0R4IPA3, F1QJX1, Q90ZY5, A0A0R4ILV6, A0A0R4IZ84, F1R3Y5, Q6NX01, Q5U3W1, E7F4J7, Q6NX09, A0A0R4IRV1, F1QUR9, Q6NYW1, E9QCS7, F8W4H3, F8W2P6, F1QXL2, A5WWI2, Q5RIL6, F1QY85, A9C3Q7, B3IWJ8, E9QIB7, F1R9X2, B3DKP1, B8J…	584	1319	15797	1.25097	1	0.815304	55.5972
GOTERM_CC_DIRECT	GO:0000151~ubiquitin ligase complex	6	0.674157	0.0529435	E7F0K2, T1ECU8, F1QD86, E7F6E1, Q6PFV0, A0A0H2UKX4	577	54	15208	2.92856	0.999998	0.660018	50.4006
GOTERM_MF_DIRECT	GO:0005524~ATP binding	75	8.42697	0.0532622	Q1LYP4, B0V360, F1QQ79, A8Y5S5, Q5RGB7, F1QLW8, A0A0R4IYB8, A5WVY0, Q9DGG8, A0A0R4IR86, B8A6F5, X1WCS2, A0A0R4IV01, F1R345, A8DZG7, C5J7W8, Q8JFR5, F1QQC9, F1RAK1, B0V237, F1R5C7, F8W3K2, B8A4A1, E7F2L1, F1Q4P2, B0UXW2, F1R5S1, E7F558, A0A140LH83, F1R3X9, F1RB74, A0A0R4IA19, F6NN58, Q5RII9, Q90ZY5, A0A140LH45, B8JLP0, F1QIK5, E7F092, F1R3Y5, F1R9W2, E7F3F0, Q5U3W1, E7FFK0, E7F4J7, Q6NX09, A0A0R4I…	584	1668	15797	1.21626	1	0.808601	56.3639
GOTERM_BP_DIRECT	GO:0007049~cell cycle	12	1.34831	0.0543527	A0A0R4IGM2, A0A0R4IPT9, F1QCU5, Q1LV44, Q6PHE8, Q5RII9, F1R983, B0V123, A1L2F3, A0A0R4IU07, E7F350, Q5SPR8	586	162	14912	1.88497	1	0.875467	59.0058
GOTERM_CC_DIRECT	GO:0030496~midbody	4	0.449438	0.0545469	Q6PHE8, Q5RII9, Q6DGX3, Q502I3	577	23	15208	4.58383	0.999998	0.641884	51.4723
GOTERM_BP_DIRECT	GO:0010501~RNA secondary structure unwinding	5	0.561798	0.0557586	F1R9W2, F1QLW8, F6NN58, A0A0R4IA19, Q5RGB7	586	37	14912	3.4388	1	0.87348	59.9676
GOTERM_BP_DIRECT	GO:0006139~nucleobase-containing compound metabolic process	5	0.561798	0.0557586	F1QBW6, F1R345, B7ZDD5, Q8UVK2, A5WWI2	586	37	14912	3.4388	1	0.87348	59.9676
GOTERM_BP_DIRECT	GO:0070286~axonemal dynein complex assembly	3	0.337079	0.0561117	F1QRC1, A0A0G2L8X4, F1RB29	586	10	14912	7.63413	1	0.866507	60.2058
GOTERM_BP_DIRECT	GO:0033077~T cell differentiation in thymus	3	0.337079	0.0561117	B0V237, F1R5C7, B8A606	586	10	14912	7.63413	1	0.866507	60.2058
GOTERM_BP_DIRECT	GO:0051301~cell division	9	1.01124	0.0566887	A0A0R4IPT9, F1QCU5, Q6PHE8, Q5RII9, F1R983, B0V123, A1L2F3, A0A0R4IU07, E7F350	586	106	14912	2.1606	1	0.860744	60.5922
UP_KEYWORDS	Cell projection	10	1.1236	0.0569656	F1R764, F1QRC1, A0A140LH62, F1QZA3, E7FCN8, Q6GQN0, A0A0G2L8X4, F1RB29, F1Q654, F1QNW2	881	125	22487	2.04195	0.999994	0.437494	52.2268
GOTERM_BP_DIRECT	GO:0060271~cilium morphogenesis	10	1.1236	0.0622333	F8W5U4, F1QDF8, F1RBQ8, F1R310, F1QPC2, F1RB29, F1Q654, F1QNW2, A2CEH0, A0A0R4IFG5	586	127	14912	2.00371	1	0.878131	64.1301
UP_KEYWORDS	Tyrosine-protein kinase	8	0.898876	0.0657977	B0V237, A0A0R4IYB8, F1R5C7, B3DKP1, F8W4H3, A0A0R4IFS9, F1R5S1, Q8JFR5	881	91	22487	2.2439	0.999999	0.471288	57.5659
UP_KEYWORDS	Activator	11	1.23596	0.0681456	Q90477, A0A0R4IH55, A1L224, A0A0R4IB37, F1QDF8, A0A0J9YJ42, F1R345, F1QS04, E7FDI9, F1QXL2, Q68EL6, Q1JPY8	881	149	22487	1.88435	1	0.468547	58.8897
GOTERM_MF_DIRECT	GO:0003697~single-stranded DNA binding	5	0.561798	0.068206	Q5RHY1, F1QK90, B8A6F5, E7F558, F1QQC9	584	42	15797	3.2202	1	0.871093	65.7112
GOTERM_MF_DIRECT	GO:0008425~2-polyprenyl-6-methoxy-1,4-benzoquinone methyltransferase activity	4	0.449438	0.0693602	F1R9X2, Q58EM4, F1R7U4, A5WW99	584	26	15797	4.16149	1	0.865263	66.3491
GOTERM_MF_DIRECT	GO:0016972~thiol oxidase activity	2	0.224719	0.0724517	B0UXN0, A4QNU9	584	2	15797	27.0497	1	0.867283	68.0036
GOTERM_BP_DIRECT	GO:0032543~mitochondrial translation	4	0.449438	0.0729011	A5WVY0, Q6IQS9, Q1L8H2, A0A0R4ING3, A0A0R4IRT6	586	25	14912	4.07154	1	0.909884	70.1155
GOTERM_CC_DIRECT	GO:0031234~extrinsic component of cytoplasmic side of plasma membrane	5	0.561798	0.0735229	B0V237, A0A0R4IYB8, F1R5C7, F8W4H3, A3KNJ9	577	42	15208	3.13774	1	0.726983	62.6332
GOTERM_CC_DIRECT	GO:0044614~nuclear pore cytoplasmic filaments	2	0.224719	0.0743175	E7F981, B0S5C8	577	2	15208	26.357	1	0.706327	63.0442
GOTERM_CC_DIRECT	GO:0071008~U2-type post-mRNA release spliceosomal complex	2	0.224719	0.0743175	F1QQ02, E7FCK8	577	2	15208	26.357	1	0.706327	63.0442
GOTERM_CC_DIRECT	GO:0015629~actin cytoskeleton	6	0.674157	0.0763352	Q6DC73, F1QES8, F1QR96, F1RCC9, E7F7V3, E9QFY4	577	60	15208	2.6357	1	0.693079	64.0691
GOTERM_BP_DIRECT	GO:0070124~mitochondrial translational initiation	2	0.224719	0.0769238	A2BEV1, F1QD40	586	2	14912	25.4471	1	0.915601	72.1188
GOTERM_BP_DIRECT	GO:0010452~histone H3-K36 methylation	2	0.224719	0.0769238	B8JIA4, E7FDI9	586	2	14912	25.4471	1	0.915601	72.1188
GOTERM_BP_DIRECT	GO:0034454~microtubule anchoring at centrosome	2	0.224719	0.0769238	F8W5U4, F1QE08	586	2	14912	25.4471	1	0.915601	72.1188
GOTERM_BP_DIRECT	GO:0000390~spliceosomal complex disassembly	2	0.224719	0.0769238	F1QQ02, E7FCK8	586	2	14912	25.4471	1	0.915601	72.1188
UP_KEYWORDS	Biological rhythms	3	0.337079	0.0778699	A0A0R4IH55, Q68EL6, Q1JPY8	881	12	22487	6.3811	1	0.501346	63.9777
GOTERM_BP_DIRECT	GO:0048511~rhythmic process	3	0.337079	0.078182	A0A0R4IH55, Q68EL6, Q1JPY8	586	12	14912	6.36177	1	0.913229	72.719
GOTERM_BP_DIRECT	GO:0060287~epithelial cilium movement involved in determination of left/right asymmetry	3	0.337079	0.078182	A0A0G2L8X4, A2CEH0, A0A0R4IFG5	586	12	14912	6.36177	1	0.913229	72.719
GOTERM_MF_DIRECT	GO:0017137~Rab GTPase binding	7	0.786517	0.0785346	F1R5W8, E7F513, F1QNW4, F1QYJ2, E7FBH3, E7FE32, R4GE71	584	81	15797	2.33762	1	0.879701	71.0395
UP_KEYWORDS	ANK repeat	16	1.79775	0.0793288	X1WCZ6, Q1LXR6, F1R5A6, B0UZD1, E7FE71, E7FEM0, F1QCY5, A0A0R4I9V6, F1QJX1, Q0II00, E7F984, Q6DGX3, F1Q5W6, F1R254, A0A0R4J8R8, A0A0R4IXB1	881	256	22487	1.59528	1	0.493917	64.689
GOTERM_MF_DIRECT	GO:0016818~hydrolase activity, acting on acid anhydrides, in phosphorus-containing anhydrides	3	0.337079	0.0810663	Q1LYP4, F1R345, B7ZDD5	584	13	15797	6.24223	1	0.87919	72.2219
GOTERM_CC_DIRECT	GO:0005874~microtubule	9	1.01124	0.0855074	F1R764, A0A0R4IPT9, Q5RII9, F1QK82, F1QZA3, F1QNW4, B2ZZ14, A1L2F3, F1RAK1	577	120	15208	1.97678	1	0.713897	68.4065
UP_KEYWORDS	Transferase	66	7.41573	0.0868124	A0A0G2L3Z2, F1QFM7, F1R9N4, B0V360, Q6P3J0, B8JIA4, A0A0G2L2R7, A8Y5S5, E7FDI9, A0A0R4I9V4, B8JMH0, A0A0R4IYB8, Q58EM4, C5J7W8, Q8JFR5, B0V237, F1R5C7, B0UXW2, F1R5S1, F1R3X9, A5WW99, F1RB74, A0A0R4IPA3, F1QJX1, Q90ZY5, A0A0R4ILV6, T1ECU8, A0A0R4IZ84, F1R7W6, F1R3Y5, Q6NX01, Q5U3W1, E7F4J7, Q6NX09, A0A0R4IRV1, Q8AW58, F1QUR9, Q6NYW1, E9QCS7, F8W4H3, F8W2P6, A0A0A0MPU6, F1QXL2, A5WWI2, Q5RIL6, F1Q…	881	1398	22487	1.20501	1	0.513017	68.1383
UP_KEYWORDS	Transcription regulation	33	3.70787	0.0884713	Q90477, P59723, Q7ZVI2, F1QS04, Q6GMI3, E7FDI9, A0A0R4IKA2, A1L224, F1R345, Q68EL6, F1QXL2, Z4YID0, Q6P984, F1QDF8, F1QVQ9, Q4U3K9, F1QRR4, A0A0R4ICZ3, Q6TA36, Q5TZC4, A0A0R4IDE2, B3DG99, B3DHZ4, A0A0R4IH55, A0A0R4IPA3, A3KQ57, A0A0R4IB37, Q5U3H2, A0A0J9YJ42, F1QTW3, Q8UVK2, Q1L8S9, Q1JPY8, B0V3D1	881	636	22487	1.32438	1	0.506755	68.8597
GOTERM_MF_DIRECT	GO:0003682~chromatin binding	10	1.1236	0.0885441	A0A0R4IGM2, F1QVT3, Q503J8, Q0II00, F1QTW3, Q6DGE6, Q6JAA4, F1QEY1, F1QY85, B8A5S8	584	145	15797	1.86549	1	0.893599	75.4565
GOTERM_MF_DIRECT	GO:0008757~S-adenosylmethionine-dependent methyltransferase activity	4	0.449438	0.0900054	F1R9X2, Q58EM4, A0A0A0MPU6, A5WW99	584	29	15797	3.73099	1	0.889837	76.0459
GOTERM_BP_DIRECT	GO:0000281~mitotic cytokinesis	3	0.337079	0.0900697	A5PMM5, Q502I3, A1L2F3	586	13	14912	5.87241	1	0.936559	77.8225
GOTERM_BP_DIRECT	GO:0021984~adenohypophysis development	3	0.337079	0.0900697	F1QHY7, B0S6T1, F1QNW2	586	13	14912	5.87241	1	0.936559	77.8225
GOTERM_BP_DIRECT	GO:0090630~activation of GTPase activity	5	0.561798	0.0929092	F1R5W8, E7F513, E7FBH3, E7F520, E7FE32	586	44	14912	2.89172	1	0.937587	78.9014
GOTERM_BP_DIRECT	GO:0007368~determination of left/right symmetry	8	0.898876	0.094053	F1QDF8, A0A0N9E2K8, F1QX08, A0A0R4IRI6, A0A0G2L8X4, F1RB29, F1Q654, F1QNW2	586	99	14912	2.05633	1	0.935289	79.322
GOTERM_BP_DIRECT	GO:0006364~rRNA processing	6	0.674157	0.0954818	F1R9W2, A2CEY8, P79741, F1R7U4, E7F350, A0A0R4IAU8	586	62	14912	2.46262	1	0.933599	79.8362
GOTERM_MF_DIRECT	GO:0031624~ubiquitin conjugating enzyme binding	4	0.449438	0.0973941	E7F0K2, T1ECU8, F1QD86, A0A0H2UKX4	584	30	15797	3.60662	1	0.90188	78.8294

[truncated: 2 more sheets: Dme-Cat2, Dme-Cat3]
